# Supplementary material for: Isolation and Characteristics of Extracellular Vesicles Produced by Probiotics: Yeast Saccharomyces boulardii CNCM I-745 and Bacterium Streptococcus salivarius K12
Source: PubMed Central journal article supplement (PMC11126510; doi:10.1007/s12602-023-10085-3), 2023-05-20
Supplement: 12602_2023_10085_MOESM1_ESM.pdf [file 12602_2023_10085_MOESM1_ESM.pdf]

# **Isolation and characteristics of extracellular vesicles produced by probiotics: yeast *Saccharomyces boulardii* CNCM I-745 and bacterium *Streptococcus salivarius* K12**

Kamila Kulig<sup>1</sup>, Katarzyna Kowalik<sup>1</sup>, Magdalena Surowiec<sup>1,2</sup>, Elzbieta Karnas<sup>3</sup>, Olga Barczyk-Woznicka<sup>4</sup>, Ewa Zuba-Surma<sup>3</sup>, Elzbieta Pyza<sup>4</sup>, Andrzej Kozik<sup>5</sup>, Maria Rapala-Kozik<sup>1</sup>, Justyna Karkowska-Kuleta<sup>1\*</sup>

<sup>1</sup> Department of Comparative Biochemistry and Bioanalytics, Faculty of Biochemistry, Biophysics and Biotechnology, Jagiellonian University, Kraków, Poland

<sup>2</sup> Doctoral School of Exact and Natural Sciences, Jagiellonian University, Kraków, Poland

<sup>3</sup> Department of Cell Biology, Faculty of Biochemistry, Biophysics and Biotechnology, Jagiellonian University, Kraków, Poland

<sup>4</sup> Department of Cell Biology and Imaging, Institute of Zoology and Biomedical Research, Jagiellonian University, Kraków, Poland

<sup>5</sup> Department of Analytical Biochemistry, Faculty of Biochemistry, Biophysics and Biotechnology, Jagiellonian University, Kraków, Poland

\*Corresponding author: justyna.karkowska@uj.edu.pl

**Supplementary Table 1. Mass spectrometry identification of *Saccharomyces boulardii* proteins in EVs.** The proteomic analysis of extracellular vesicles was performed with samples prepared with a total amount of proteins equal to 11 µg. After digestion with Trypsin/Lys-C Mix the resulting peptides were analyzed using UltiMate 3000 RSLCnano System coupled with Q-Exactive mass spectrometer with DPV-550 Digital PicoView nanospray source. The obtained lists of peaks were searched against the NCBI protein database with the locally installed MASCOT search engine using the taxonomy restrictions: *Saccharomyces boulardii*. The Target Decoy PSM Validator was applied with the maximum false discovery rate (FDR) for peptides set to 0.01. Proteins identified with a score > 19 and a number of identified peptides ≥ 1 are only listed.

| Accession number | Description                                                                                              | Molecular mass [kDa] | Score    | Coverage | # Proteins | # Unique Peptides | # Peptides | # PSMs | # AAs | calc. pI |
|------------------|----------------------------------------------------------------------------------------------------------|----------------------|----------|----------|------------|-------------------|------------|--------|-------|----------|
| KQC43708.1       | Bifunctional alcohol dehydrogenase and formaldehyde dehydrogenase [ <i>Saccharomyces boulardii</i> ]     | 35.7                 | 11091.31 | 62.65    | 1          | 4                 | 22         | 309    | 332   | 6.74     |
| KQC42965.1       | Glyceraldehyde-3-phosphate dehydrogenase (GAPDH), isozyme 2 [ <i>Saccharomyces boulardii</i> ]           | 35.8                 | 10400.92 | 68.98    | 1          | 4                 | 22         | 309    | 332   | 6.96     |
| KQC40410.1       | Alpha subunit of fatty acid synthetase [ <i>Saccharomyces boulardii</i> ]                                | 206.9                | 8413.64  | 45.10    | 1          | 68                | 68         | 216    | 1887  | 5.50     |
| KQC43016.1       | Glyceraldehyde-3-phosphate dehydrogenase (GAPDH), isozyme 1 [ <i>Saccharomyces boulardii</i> ]           | 35.7                 | 7428.09  | 68.67    | 1          | 1                 | 21         | 210    | 332   | 8.51     |
| KOH49774.1       | TDH1p Glyceraldehyde-3-phosphate dehydrogenase (GAPDH), isozyme 1 [ <i>Saccharomyces boulardii</i> ]     | 35.7                 | 7397.10  | 66.57    | 1          | 1                 | 20         | 208    | 332   | 8.51     |
| KQC42790.1       | Beta subunit of fatty acid synthetase [ <i>Saccharomyces boulardii</i> ]                                 | 228.5                | 7050.62  | 38.81    | 1          | 63                | 63         | 184    | 2051  | 5.96     |
| KQC45527.1       | Translational elongation factor EF-1 alpha [ <i>Saccharomyces boulardii</i> ]                            | 50.0                 | 7022.61  | 41.70    | 1          | 15                | 16         | 223    | 458   | 9.04     |
| KQC41085.1       | Ribosomal 60S subunit protein L3 [ <i>Saccharomyces boulardii</i> ]                                      | 43.7                 | 5335.31  | 38.50    | 1          | 14                | 14         | 136    | 387   | 10.29    |
| KQC42168.1       | PDC1p [ <i>Saccharomyces boulardii</i> ]                                                                 | 61.5                 | 4491.80  | 43.16    | 2          | 17                | 20         | 98     | 563   | 6.19     |
| KQC45164.1       | Shmoo tip protein, substrate of Hub1p ubiquitin-like protein [ <i>Saccharomyces boulardii</i> ]          | 254.2                | 4134.69  | 28.26    | 2          | 40                | 40         | 78     | 2293  | 6.67     |
| AGZ13685.1       | pyruvate kinase [ <i>Saccharomyces boulardii</i> ]                                                       | 54.5                 | 4053.91  | 61.00    | 1          | 22                | 23         | 117    | 500   | 7.68     |
| KQC41338.1       | Acetyl-CoA carboxylase, biotin containing enzyme [ <i>Saccharomyces boulardii</i> ]                      | 250.2                | 3978.62  | 31.21    | 2          | 54                | 54         | 129    | 2233  | 6.28     |
| KQC43665.1       | Alpha subunit of heterooctameric phosphofructokinase [ <i>Saccharomyces boulardii</i> ]                  | 107.9                | 3737.42  | 41.95    | 1          | 30                | 31         | 72     | 987   | 6.39     |
| KQC42352.1       | Tetradecameric mitochondrial chaperonin [ <i>Saccharomyces boulardii</i> ]                               | 60.7                 | 3703.25  | 52.62    | 1          | 24                | 24         | 77     | 572   | 5.31     |
| KQC44614.1       | Elongation factor 2 (EF-2), also encoded by EFT1 [ <i>Saccharomyces boulardii</i> ]                      | 93.2                 | 3701.22  | 45.13    | 2          | 34                | 34         | 84     | 842   | 6.32     |
| KQC42344.1       | Translation elongation factor 3 [ <i>Saccharomyces boulardii</i> ]                                       | 115.9                | 3524.79  | 29.89    | 2          | 19                | 27         | 97     | 1044  | 6.05     |
| KQC43088.1       | Bifunctional carbamoylphosphate synthetase/aspartate transcarbamylase [ <i>Saccharomyces boulardii</i> ] | 244.9                | 3197.91  | 29.45    | 3          | 55                | 56         | 89     | 2214  | 5.81     |
| KQC41533.1       | Cytoplasmic ATPase that is a ribosome-associated molecular chaperone [ <i>Saccharomyces boulardii</i> ]  | 66.6                 | 3083.71  | 48.12    | 1          | 1                 | 20         | 65     | 613   | 5.44     |
| KOH50682.1       | PMA1p Plasma membrane P2-type H <sup>+</sup> -ATPase [ <i>Saccharomyces boulardii</i> ]                  | 99.6                 | 3077.84  | 34.10    | 2          | 9                 | 22         | 77     | 918   | 5.11     |
| KQC41701.1       | Cortical ER protein involved in ER-plasma membrane tethering [ <i>Saccharomyces boulardii</i> ]          | 196.4                | 3065.27  | 14.46    | 3          | 15                | 22         | 90     | 1770  | 8.63     |
| KQC40590.1       | Plasma membrane H <sup>+</sup> -ATPase [ <i>Saccharomyces boulardii</i> ]                                | 102.1                | 3050.84  | 31.05    | 1          | 8                 | 21         | 71     | 947   | 5.06     |
| KQC40502.1       | Ribosomal 60S subunit protein L5 [ <i>Saccharomyces boulardii</i> ]                                      | 33.7                 | 2961.79  | 51.18    | 2          | 12                | 12         | 85     | 297   | 6.83     |
| KQC45169.1       | Cytoplasmic ATPase that is a ribosome-associated molecular chaperone [ <i>Saccharomyces boulardii</i> ]  | 66.6                 | 2863.35  | 48.12    | 1          | 1                 | 20         | 62     | 613   | 5.44     |
| KQC45754.1       | ATPase involved in protein folding and NLS-directed nuclear transport [ <i>Saccharomyces boulardii</i> ] | 69.6                 | 2744.17  | 50.16    | 1          | 8                 | 22         | 70     | 642   | 5.11     |
| KQC42108.1       | hypothetical protein AB282_03288 [ <i>Saccharomyces boulardii</i> ]                                      | 69.5                 | 2719.09  | 39.44    | 1          | 4                 | 19         | 67     | 639   | 5.08     |

|            |                                                                                                        |       |         |       |   |    |    |    |      |       |
|------------|--------------------------------------------------------------------------------------------------------|-------|---------|-------|---|----|----|----|------|-------|
| KQC43516.1 | Peptidyl-prolyl cis-trans isomerase (cyclophilin) [ <i>Saccharomyces boulardii</i> ]                   | 22.8  | 2711.42 | 50.73 | 1 | 8  | 8  | 53 | 205  | 6.13  |
| KQC42685.1 | Fructose 1,6-bisphosphate aldolase [ <i>Saccharomyces boulardii</i> ]                                  | 39.6  | 2636.56 | 42.06 | 1 | 11 | 11 | 59 | 359  | 5.78  |
| KQC43404.1 | Enolase II, a phosphopyruvate hydratase [ <i>Saccharomyces boulardii</i> ]                             | 46.9  | 2601.09 | 47.83 | 1 | 8  | 18 | 60 | 437  | 6.00  |
| KQC41711.1 | Ribosomal protein 10 (rp10) of the small (40S) subunit [ <i>Saccharomyces boulardii</i> ]              | 28.8  | 2576.28 | 51.37 | 1 | 2  | 12 | 89 | 255  | 10.02 |
| KQC42509.1 | Ribosomal protein 10 (rp10) of the small (40S) subunit [ <i>Saccharomyces boulardii</i> ]              | 28.7  | 2561.01 | 54.51 | 1 | 3  | 13 | 90 | 255  | 9.99  |
| KQC45706.1 | Acetyl-coA synthetase isoform [ <i>Saccharomyces boulardii</i> ]                                       | 79.1  | 2546.64 | 39.69 | 1 | 22 | 23 | 66 | 713  | 6.62  |
| KQC45448.1 | Ribosomal 60S subunit protein L4A [ <i>Saccharomyces boulardii</i> ]                                   | 39.1  | 2534.13 | 44.75 | 1 | 12 | 12 | 57 | 362  | 10.64 |
| KQC43803.1 | Eisosome core component [ <i>Saccharomyces boulardii</i> ]                                             | 38.3  | 2495.60 | 52.51 | 1 | 11 | 13 | 66 | 339  | 4.63  |
| KQC42998.1 | ATPase involved in protein import into the ER [ <i>Saccharomyces boulardii</i> ]                       | 74.4  | 2493.48 | 41.20 | 1 | 21 | 22 | 62 | 682  | 4.93  |
| KQC42515.1 | Ribosomal 60S subunit protein L6B [ <i>Saccharomyces boulardii</i> ]                                   | 20.0  | 2323.48 | 51.70 | 1 | 3  | 10 | 78 | 176  | 10.08 |
| KQC45484.1 | Small heat shock protein (sHSP) with chaperone activity [ <i>Saccharomyces boulardii</i> ]             | 23.9  | 2279.98 | 55.61 | 1 | 12 | 12 | 63 | 214  | 5.53  |
| KQC43357.1 | Invertase [ <i>Saccharomyces boulardii</i> ]                                                           | 58.6  | 2277.61 | 29.10 | 1 | 13 | 13 | 58 | 512  | 4.73  |
| KQC44194.1 | Actin [ <i>Saccharomyces boulardii</i> ]                                                               | 41.7  | 2177.71 | 47.20 | 2 | 14 | 14 | 56 | 375  | 5.68  |
| KQC45076.1 | Component of the Mcm2-7 hexameric helicase complex [ <i>Saccharomyces boulardii</i> ]                  | 92.0  | 2174.09 | 40.72 | 1 | 28 | 28 | 60 | 835  | 4.94  |
| KQC41936.1 | Cytoplasmic chaperone of the Hsp90 family [ <i>Saccharomyces boulardii</i> ]                           | 80.8  | 2102.00 | 37.87 | 2 | 5  | 26 | 58 | 705  | 4.83  |
| AGZ13686.1 | phosphopyruvate hydratase enolase i [ <i>Saccharomyces boulardii</i> ]                                 | 46.8  | 2095.63 | 44.62 | 1 | 7  | 17 | 46 | 437  | 6.62  |
| KQC42421.1 | FK506 Sensitivity [ <i>Saccharomyces boulardii</i> ]                                                   | 214.9 | 2075.72 | 19.83 | 2 | 17 | 26 | 45 | 1876 | 7.11  |
| KQC42090.1 | Ribosomal 60S subunit protein L8B [ <i>Saccharomyces boulardii</i> ]                                   | 28.1  | 2051.29 | 50.00 | 3 | 2  | 14 | 53 | 256  | 10.02 |
| KQC41678.1 | Large subunit of trehalose 6-phosphate synthase/phosphatase complex [ <i>Saccharomyces boulardii</i> ] | 122.9 | 1982.96 | 24.95 | 1 | 22 | 23 | 51 | 1098 | 6.70  |
| KQC40810.1 | Mitochondrial aldehyde dehydrogenase [ <i>Saccharomyces boulardii</i> ]                                | 56.7  | 1975.13 | 56.07 | 1 | 20 | 20 | 53 | 519  | 6.74  |
| KQC41955.1 | Beta subunit of heterooctameric phosphofructokinase [ <i>Saccharomyces boulardii</i> ]                 | 104.5 | 1970.81 | 33.06 | 1 | 23 | 24 | 46 | 959  | 6.52  |
| KQC42114.1 | Mitochondrial aspartyl-tRNA synthetase [ <i>Saccharomyces boulardii</i> ]                              | 63.5  | 1935.08 | 44.52 | 2 | 22 | 22 | 43 | 557  | 6.58  |
| KQC40402.1 | Hsp90 chaperone [ <i>Saccharomyces boulardii</i> ]                                                     | 81.3  | 1868.09 | 37.38 | 2 | 4  | 25 | 53 | 709  | 4.91  |
| KQC45443.1 | P-loop ATPase [ <i>Saccharomyces boulardii</i> ]                                                       | 44.1  | 1864.36 | 37.06 | 1 | 13 | 13 | 44 | 394  | 7.43  |
| KQC40782.1 | Subunit 2 of ubiquinol cytochrome-c reductase (Complex III) [ <i>Saccharomyces boulardii</i> ]         | 40.4  | 1858.02 | 58.42 | 1 | 17 | 17 | 65 | 368  | 7.96  |
| AGZ13684.1 | phosphoglycerate kinase [ <i>Saccharomyces boulardii</i> ]                                             | 44.7  | 1853.79 | 49.04 | 1 | 18 | 18 | 50 | 416  | 7.61  |
| KQC43395.1 | 6-phosphogluconate dehydrogenase (decarboxylating) [ <i>Saccharomyces boulardii</i> ]                  | 53.5  | 1838.94 | 34.15 | 1 | 11 | 14 | 42 | 489  | 6.64  |
| KQC40526.1 | ATPase component of heat shock protein Hsp90 chaperone complex [ <i>Saccharomyces boulardii</i> ]      | 77.3  | 1779.72 | 28.72 | 5 | 14 | 17 | 47 | 693  | 5.22  |
| KQC43968.1 | ARC1p that binds tRNA and methionyl- and glutamyl-tRNA synthetase [ <i>Saccharomyces boulardii</i> ]   | 42.1  | 1745.54 | 36.70 | 1 | 11 | 11 | 58 | 376  | 7.88  |
| KQC43478.1 | Hexose transporter with moderate affinity for glucose [ <i>Saccharomyces boulardii</i> ]               | 66.2  | 1714.05 | 24.49 | 5 | 10 | 14 | 37 | 592  | 7.61  |

|            |                                                                                                                  |       |         |       |   |    |    |    |      |       |
|------------|------------------------------------------------------------------------------------------------------------------|-------|---------|-------|---|----|----|----|------|-------|
| KQC41353.1 | Citrate synthase [ <i>Saccharomyces boulardii</i> ]                                                              | 53.3  | 1699.10 | 31.94 | 1 | 14 | 14 | 42 | 479  | 8.29  |
| KQC42866.1 | Beta subunit of the F1 sector of mitochondrial F1F0 ATP synthase [ <i>Saccharomyces boulardii</i> ]              | 54.8  | 1658.55 | 39.73 | 1 | 13 | 13 | 42 | 511  | 5.71  |
| KQC45617.1 | Pyruvate carboxylase isoform [ <i>Saccharomyces boulardii</i> ]                                                  | 130.1 | 1612.39 | 23.90 | 1 | 5  | 24 | 47 | 1180 | 6.51  |
| KQC43108.1 | Inositol-3-phosphate synthase [ <i>Saccharomyces boulardii</i> ]                                                 | 59.6  | 1578.60 | 27.39 | 1 | 13 | 13 | 35 | 533  | 5.92  |
| KQC42106.1 | Disaggregase [ <i>Saccharomyces boulardii</i> ]                                                                  | 102.0 | 1554.39 | 35.13 | 1 | 29 | 30 | 46 | 908  | 5.45  |
| KQC45263.1 | Acetate transporter required for normal sporulation [ <i>Saccharomyces boulardii</i> ]                           | 30.7  | 1525.78 | 13.07 | 1 | 2  | 2  | 26 | 283  | 5.15  |
| KQC44347.1 | ATPase of the ATP-binding cassette (ABC) family [ <i>Saccharomyces boulardii</i> ]                               | 68.3  | 1522.76 | 36.07 | 1 | 19 | 19 | 28 | 610  | 6.51  |
| KQC43605.1 | Ribosomal 60S subunit protein L8A [ <i>Saccharomyces boulardii</i> ]                                             | 28.1  | 1520.81 | 54.30 | 3 | 3  | 15 | 41 | 256  | 10.04 |
| KQC44379.1 | Isocitrate lyase [ <i>Saccharomyces boulardii</i> ]                                                              | 62.4  | 1519.38 | 32.85 | 1 | 14 | 14 | 37 | 557  | 6.42  |
| KQC41147.1 | Phospholipase B (lysophospholipase) involved in lipid metabolism [ <i>Saccharomyces boulardii</i> ]              | 75.0  | 1498.44 | 24.05 | 1 | 11 | 12 | 33 | 686  | 5.03  |
| KQC41652.1 | hypothetical protein AB282_03715 [ <i>Saccharomyces boulardii</i> ]                                              | 59.6  | 1476.90 | 38.21 | 1 | 18 | 18 | 36 | 513  | 7.97  |
| KQC44654.1 | High-affinity glucose transporter [ <i>Saccharomyces boulardii</i> ]                                             | 62.7  | 1456.45 | 23.86 | 9 | 6  | 10 | 37 | 570  | 7.75  |
| KQC43375.1 | RPS4Ap component of the small (40S) ribosomal subunit [ <i>Saccharomyces boulardii</i> ]                         | 29.4  | 1455.36 | 47.51 | 3 | 14 | 14 | 42 | 261  | 10.08 |
| KQC45535.1 | Subunit B of V1 peripheral membrane domain of vacuolar H <sup>+</sup> -ATPase [ <i>Saccharomyces boulardii</i> ] | 57.7  | 1449.93 | 44.29 | 1 | 18 | 18 | 35 | 517  | 5.07  |
| KQC41508.1 | RPS3p component of the small (40S) ribosomal subunit [ <i>Saccharomyces boulardii</i> ]                          | 26.5  | 1395.20 | 68.75 | 1 | 16 | 16 | 36 | 240  | 9.41  |
| KQC40619.1 | Eisosome core component [ <i>Saccharomyces boulardii</i> ]                                                       | 38.0  | 1392.26 | 43.99 | 1 | 11 | 12 | 30 | 341  | 4.70  |
| KQC41366.1 | Translational elongation factor EF-3 [ <i>Saccharomyces boulardii</i> ]                                          | 115.8 | 1377.32 | 17.05 | 2 | 7  | 15 | 38 | 1044 | 6.18  |
| KQC44055.1 | Clathrin heavy chain [ <i>Saccharomyces boulardii</i> ]                                                          | 187.0 | 1364.90 | 18.15 | 2 | 26 | 26 | 36 | 1653 | 5.27  |
| KQC41403.1 | Mitochondrial NADH kinase [ <i>Saccharomyces boulardii</i> ]                                                     | 30.4  | 1360.10 | 56.54 | 1 | 13 | 13 | 31 | 283  | 8.32  |
| KQC42537.1 | Phosphoenolpyruvate carboxykinase [ <i>Saccharomyces boulardii</i> ]                                             | 60.9  | 1357.41 | 33.33 | 1 | 14 | 14 | 33 | 549  | 6.34  |
| AML33326.1 | aldehyde dehydrogenase Ald6p [ <i>Saccharomyces boulardii</i> ]                                                  | 54.4  | 1354.23 | 54.00 | 2 | 19 | 19 | 41 | 500  | 5.44  |
| KQC43932.1 | Pyruvate carboxylase isoform [ <i>Saccharomyces boulardii</i> ]                                                  | 129.9 | 1347.18 | 23.34 | 1 | 4  | 23 | 40 | 1178 | 6.21  |
| KQC43849.1 | Catalytic subunit of 1,3-beta-glucan synthase [ <i>Saccharomyces boulardii</i> ]                                 | 216.9 | 1340.89 | 15.04 | 2 | 9  | 19 | 31 | 1895 | 6.98  |
| KOH52313.1 | RPG1p eIF3a subunit of the eukaryotic translation initiation factor 3 (eIF3) [ <i>Saccharomyces boulardii</i> ]  | 110.5 | 1339.27 | 27.07 | 2 | 25 | 25 | 42 | 964  | 6.38  |
| KQC42050.1 | Cell wall protein with similarity to glucanase [ <i>Saccharomyces boulardii</i> ]                                | 40.4  | 1329.62 | 25.96 | 1 | 9  | 9  | 24 | 389  | 4.65  |
| KQC41288.1 | Daughter cell-specific secreted protein with similarity to glucanase [ <i>Saccharomyces boulardii</i> ]          | 121.0 | 1319.11 | 14.68 | 1 | 9  | 9  | 22 | 1117 | 4.53  |
| KQC44127.1 | Ribosomal 60S subunit protein L2B [ <i>Saccharomyces boulardii</i> ]                                             | 27.4  | 1305.90 | 49.61 | 2 | 10 | 10 | 42 | 254  | 11.11 |
| KQC42864.1 | RPS5p component of the small (40S) ribosomal subunit [ <i>Saccharomyces boulardii</i> ]                          | 25.0  | 1278.12 | 32.44 | 1 | 7  | 7  | 27 | 225  | 8.59  |
| KQC44827.1 | Dihydrolipoyl transsuccinylase [ <i>Saccharomyces boulardii</i> ]                                                | 50.4  | 1263.35 | 41.04 | 1 | 13 | 13 | 37 | 463  | 8.85  |
| KQC42725.1 | Glutamine-fructose-6-phosphate amidotransferase [ <i>Saccharomyces boulardii</i> ]                               | 80.0  | 1258.34 | 33.05 | 1 | 19 | 19 | 31 | 717  | 6.43  |
| KQC42937.1 | Hsp70 family ATPase [ <i>Saccharomyces boulardii</i> ]                                                           | 70.8  | 1238.56 | 39.85 | 2 | 20 | 20 | 32 | 655  | 5.53  |

|            |                                                                                                          |       |         |       |   |    |    |    |      |       |
|------------|----------------------------------------------------------------------------------------------------------|-------|---------|-------|---|----|----|----|------|-------|
| KQC43284.1 | Threonyl-tRNA synthetase [ <i>Saccharomyces boulardii</i> ]                                              | 84.4  | 1237.19 | 37.19 | 1 | 25 | 25 | 35 | 734  | 6.93  |
| KQC45352.1 | Cytoplasmic isoleucine-tRNA synthetase [ <i>Saccharomyces boulardii</i> ]                                | 122.8 | 1229.05 | 24.07 | 1 | 20 | 20 | 31 | 1072 | 6.11  |
| KQC45353.1 | ATPase involved in protein folding and the response to stress [ <i>Saccharomyces boulardii</i> ]         | 70.5  | 1223.12 | 26.50 | 1 | 10 | 13 | 29 | 649  | 5.17  |
| KQC45082.1 | Homocitrate synthase isozyme [ <i>Saccharomyces boulardii</i> ]                                          | 48.6  | 1218.53 | 30.68 | 1 | 1  | 10 | 29 | 440  | 6.30  |
| KQC41895.1 | Ribosomal 60S subunit protein L13B [ <i>Saccharomyces boulardii</i> ]                                    | 22.5  | 1217.14 | 47.74 | 2 | 10 | 10 | 27 | 199  | 11.08 |
| KQC45300.1 | Member of the protein disulfide isomerase (PDI) family [ <i>Saccharomyces boulardii</i> ]                | 58.2  | 1211.27 | 29.50 | 1 | 2  | 10 | 22 | 522  | 4.53  |
| KQC45343.1 | Ribosomal 60S subunit protein L23B [ <i>Saccharomyces boulardii</i> ]                                    | 14.5  | 1197.14 | 47.45 | 1 | 6  | 6  | 30 | 137  | 10.33 |
| KQC41038.1 | ATPase of the 19S regulatory particle of the 26S proteasome [ <i>Saccharomyces boulardii</i> ]           | 48.2  | 1183.19 | 49.08 | 1 | 17 | 17 | 30 | 434  | 5.06  |
| KQC45096.1 | Alpha subunit of COPI vesicle coatomer complex [ <i>Saccharomyces boulardii</i> ]                        | 135.5 | 1157.72 | 21.65 | 1 | 19 | 19 | 33 | 1201 | 6.04  |
| KQC44892.1 | Phosphatase subunit of the trehalose-6-P synthase/phosphatase complex [ <i>Saccharomyces boulardii</i> ] | 102.9 | 1153.51 | 25.56 | 2 | 18 | 18 | 30 | 896  | 8.05  |
| KQC42629.1 | Dynamin-like GTPase required for vacuolar sorting [ <i>Saccharomyces boulardii</i> ]                     | 78.7  | 1138.44 | 26.99 | 2 | 17 | 18 | 27 | 704  | 7.91  |
| KQC41777.1 | Subunit of the eukaryotic translation initiation factor 3 (eIF3) [ <i>Saccharomyces boulardii</i> ]      | 145.0 | 1133.54 | 20.60 | 1 | 22 | 22 | 32 | 1277 | 6.39  |
| KQC42621.1 | 3-hydroxyacyl-CoA dehydrogenase and enoyl-CoA hydratase [ <i>Saccharomyces boulardii</i> ]               | 98.6  | 1126.09 | 29.78 | 1 | 22 | 22 | 30 | 900  | 9.00  |
| KQC45332.1 | Alpha subunit of the F1 sector of mitochondrial F1F0 ATP synthase [ <i>Saccharomyces boulardii</i> ]     | 58.6  | 1115.65 | 32.29 | 1 | 16 | 16 | 33 | 545  | 9.04  |
| KQC42705.1 | Gamma subunit of translational elongation factor eEF1B [ <i>Saccharomyces boulardii</i> ]                | 46.5  | 1110.36 | 32.04 | 1 | 10 | 12 | 29 | 412  | 7.87  |
| KQC42302.1 | Essential evolutionarily-conserved nucleolar protein [ <i>Saccharomyces boulardii</i> ]                  | 56.8  | 1108.30 | 35.71 | 1 | 14 | 14 | 27 | 504  | 8.90  |
| KQC40480.1 | Vacuolar aspartyl protease (proteinase A) [ <i>Saccharomyces boulardii</i> ]                             | 44.5  | 1102.45 | 28.64 | 1 | 8  | 8  | 25 | 405  | 4.84  |
| KQC43942.1 | Ribosomal 60S subunit protein L7A [ <i>Saccharomyces boulardii</i> ]                                     | 27.6  | 1093.58 | 48.77 | 1 | 13 | 13 | 29 | 244  | 10.15 |
| KQC45390.1 | Major ADP/ATP carrier of the mitochondrial inner membrane [ <i>Saccharomyces boulardii</i> ]             | 34.4  | 1084.95 | 35.53 | 2 | 11 | 12 | 40 | 318  | 9.77  |
| KQC42281.1 | Cytosolic NADP-specific isocitrate dehydrogenase [ <i>Saccharomyces boulardii</i> ]                      | 46.5  | 1084.07 | 40.78 | 1 | 12 | 14 | 29 | 412  | 6.19  |
| KQC42271.1 | Acetyl-coA synthetase isoform [ <i>Saccharomyces boulardii</i> ]                                         | 75.4  | 1075.66 | 31.19 | 1 | 17 | 18 | 27 | 683  | 6.71  |
| KQC44088.1 | Glutamyl-tRNA synthetase (GluRS) [ <i>Saccharomyces boulardii</i> ]                                      | 80.8  | 1071.82 | 28.53 | 1 | 22 | 22 | 29 | 708  | 7.53  |
| KOH51991.1 | PDI1p Protein disulfide isomerase [ <i>Saccharomyces boulardii</i> ]                                     | 56.8  | 1070.82 | 25.93 | 1 | 1  | 9  | 19 | 509  | 4.63  |
| KQC41457.1 | Malate synthase, enzyme of the glyoxylate cycle [ <i>Saccharomyces boulardii</i> ]                       | 62.7  | 1063.48 | 26.17 | 2 | 13 | 13 | 32 | 554  | 7.03  |
| KQC45432.1 | Alpha-1,2-mannosyltransferase [ <i>Saccharomyces boulardii</i> ]                                         | 67.7  | 1063.22 | 38.53 | 1 | 2  | 17 | 37 | 597  | 6.06  |
| KQC41637.1 | Glycosylphosphatidylinositol (GPI)-anchored cell wall endoglucanase [ <i>Saccharomyces boulardii</i> ]   | 108.3 | 1053.85 | 10.18 | 1 | 5  | 5  | 19 | 1041 | 4.81  |
| KOH52370.1 | MNN2p Alpha-1,2-mannosyltransferase [ <i>Saccharomyces boulardii</i> ]                                   | 67.7  | 1043.20 | 37.86 | 1 | 1  | 16 | 36 | 597  | 6.27  |
| KQC40574.1 | mannosylphosphate transferase [ <i>Saccharomyces boulardii</i> ]                                         | 48.2  | 1034.47 | 39.81 | 1 | 12 | 12 | 21 | 412  | 5.08  |
| KQC41173.1 | Ribosomal protein 51 (rp51) of the small (40s) subunit [ <i>Saccharomyces boulardii</i> ]                | 16.0  | 1033.85 | 33.80 | 5 | 4  | 4  | 28 | 142  | 10.70 |

|            |                                                                                                     |       |         |       |   |    |    |    |      |       |
|------------|-----------------------------------------------------------------------------------------------------|-------|---------|-------|---|----|----|----|------|-------|
| KQC44336.1 | hypothetical protein AB282_01592 [ <i>Saccharomyces boulardii</i> ]                                 | 157.3 | 1032.22 | 18.14 | 3 | 17 | 18 | 27 | 1417 | 6.21  |
| KQC42788.1 | Ribosomal 60S subunit protein L17A [ <i>Saccharomyces boulardii</i> ]                               | 20.5  | 1027.25 | 39.13 | 1 | 1  | 6  | 21 | 184  | 10.92 |
| KQC44406.1 | Cobalamin-independent methionine synthase [ <i>Saccharomyces boulardii</i> ]                        | 85.8  | 1015.94 | 31.16 | 1 | 21 | 21 | 28 | 767  | 6.47  |
| KQC45034.1 | RPS16Bp component of the small (40S) ribosomal subunit [ <i>Saccharomyces boulardii</i> ]           | 15.8  | 1010.12 | 45.45 | 1 | 6  | 6  | 23 | 143  | 10.26 |
| AGZ13687.1 | alcohol dehydrogenase [ <i>Saccharomyces boulardii</i> ]                                            | 32.9  | 1002.53 | 45.31 | 3 | 11 | 14 | 30 | 309  | 7.12  |
| KQC42724.1 | hypothetical protein AB282_03152 [ <i>Saccharomyces boulardii</i> ]                                 | 57.0  | 1001.97 | 27.82 | 1 | 9  | 9  | 20 | 514  | 5.74  |
| KQC42500.1 | Inosine monophosphate dehydrogenase [ <i>Saccharomyces boulardii</i> ]                              | 56.5  | 999.78  | 30.02 | 2 | 6  | 10 | 22 | 523  | 7.40  |
| KQC40753.1 | Glycogen phosphorylase required for the mobilization of glycogen [ <i>Saccharomyces boulardii</i> ] | 103.2 | 997.37  | 26.27 | 1 | 18 | 19 | 29 | 902  | 5.62  |
| KQC43802.1 | Minor isoform of pyruvate decarboxylase [ <i>Saccharomyces boulardii</i> ]                          | 61.5  | 984.26  | 17.76 | 1 | 5  | 8  | 16 | 563  | 6.19  |
| KQC44912.1 | RPS13p component of the small (40S) ribosomal subunit [ <i>Saccharomyces boulardii</i> ]            | 17.0  | 980.64  | 56.29 | 1 | 8  | 8  | 32 | 151  | 10.43 |
| KQC40902.1 | Subunit a of vacuolar-ATPase V0 domain [ <i>Saccharomyces boulardii</i> ]                           | 95.5  | 976.42  | 20.71 | 1 | 14 | 14 | 25 | 840  | 5.48  |
| KQC41056.1 | RPS7Ap component of the small (40S) ribosomal subunit [ <i>Saccharomyces boulardii</i> ]            | 21.6  | 975.23  | 35.26 | 1 | 4  | 7  | 32 | 190  | 9.83  |
| KQC40839.1 | RNA polymerase I largest subunit A190 [ <i>Saccharomyces boulardii</i> ]                            | 186.3 | 970.01  | 12.74 | 1 | 14 | 15 | 19 | 1664 | 7.08  |
| KQC44107.1 | Hexokinase isoenzyme 1 [ <i>Saccharomyces boulardii</i> ]                                           | 53.7  | 969.35  | 47.84 | 1 | 15 | 15 | 24 | 485  | 5.45  |
| KQC43630.1 | Cell wall protein with similarity to glucanase [ <i>Saccharomyces boulardii</i> ]                   | 40.1  | 960.18  | 10.62 | 1 | 3  | 3  | 13 | 386  | 4.79  |
| KQC45128.1 | Homocitrate synthase isozyme [ <i>Saccharomyces boulardii</i> ]                                     | 47.1  | 958.56  | 33.88 | 1 | 2  | 11 | 20 | 428  | 7.27  |
| KQC45299.1 | Glucokinase [ <i>Saccharomyces boulardii</i> ]                                                      | 55.4  | 956.43  | 28.80 | 1 | 11 | 11 | 26 | 500  | 6.25  |
| KQC45583.1 | RPS6Bp component of the small (40S) ribosomal subunit [ <i>Saccharomyces boulardii</i> ]            | 27.0  | 941.14  | 39.83 | 2 | 10 | 11 | 24 | 236  | 10.45 |
| KQC43717.1 | Ribonucleotide-diphosphate reductase (RNR) small subunit [ <i>Saccharomyces boulardii</i> ]         | 40.0  | 936.15  | 25.51 | 1 | 8  | 8  | 16 | 345  | 5.21  |
| KOH49880.1 | MIR1p Mitochondrial phosphate carrier [ <i>Saccharomyces boulardii</i> ]                            | 32.8  | 935.28  | 38.26 | 2 | 10 | 10 | 21 | 311  | 9.31  |
| KQC43350.1 | Mitochondrial glycerol-3-phosphate dehydrogenase [ <i>Saccharomyces boulardii</i> ]                 | 72.3  | 917.98  | 37.44 | 1 | 22 | 22 | 30 | 649  | 7.71  |
| KQC40474.1 | Cytosolic leucyl tRNA synthetase [ <i>Saccharomyces boulardii</i> ]                                 | 124.1 | 915.69  | 21.83 | 1 | 17 | 17 | 19 | 1090 | 5.90  |
| KQC45130.1 | Subunit A of the V1 peripheral membrane domain of V-ATPase [ <i>Saccharomyces boulardii</i> ]       | 118.5 | 914.53  | 19.33 | 1 | 17 | 17 | 24 | 1071 | 6.10  |
| KQC43332.1 | Mitochondrial outer membrane protein [ <i>Saccharomyces boulardii</i> ]                             | 44.6  | 914.21  | 38.68 | 1 | 15 | 15 | 25 | 393  | 8.75  |
| KQC44046.1 | Positive regulator of the Gcn2p kinase activity [ <i>Saccharomyces boulardii</i> ]                  | 296.5 | 906.01  | 9.09  | 1 | 21 | 21 | 23 | 2672 | 5.26  |
| KQC44985.1 | NAD-dependent glycerol-3-phosphate dehydrogenase [ <i>Saccharomyces boulardii</i> ]                 | 42.8  | 900.19  | 26.34 | 1 | 7  | 7  | 16 | 391  | 5.47  |
| KQC41253.1 | Ribosomal 60S subunit protein L25 [ <i>Saccharomyces boulardii</i> ]                                | 15.7  | 889.50  | 42.25 | 1 | 5  | 5  | 21 | 142  | 10.11 |
| KQC43251.1 | BAR domain protein [ <i>Saccharomyces boulardii</i> ]                                               | 36.6  | 883.60  | 28.83 | 1 | 8  | 8  | 15 | 326  | 4.97  |
| KQC43130.1 | Ribosomal 60S subunit protein L17B [ <i>Saccharomyces boulardii</i> ]                               | 20.5  | 883.24  | 39.13 | 1 | 1  | 6  | 18 | 184  | 10.92 |
| KQC42444.1 | RPS22Bp component of the small (40S) ribosomal subunit [ <i>Saccharomyces boulardii</i> ]           | 14.6  | 860.59  | 48.46 | 2 | 6  | 6  | 26 | 130  | 9.94  |
| KQC40990.1 | Glutamine tRNA synthetase [ <i>Saccharomyces boulardii</i> ]                                        | 93.1  | 860.34  | 21.76 | 1 | 16 | 16 | 22 | 809  | 8.41  |

|            |                                                                                                                 |       |        |       |   |    |    |    |      |       |
|------------|-----------------------------------------------------------------------------------------------------------------|-------|--------|-------|---|----|----|----|------|-------|
| KQC44013.1 | Vacuolar alpha mannosidase [ <i>Saccharomyces boulardii</i> ]                                                   | 124.4 | 853.01 | 22.25 | 7 | 19 | 20 | 31 | 1083 | 7.24  |
| KQC40960.1 | ATP-dependent DEAD (Asp-Glu-Ala-Asp)-box RNA helicase [ <i>Saccharomyces boulardii</i> ]                        | 65.5  | 852.10 | 26.99 | 1 | 10 | 14 | 25 | 604  | 7.83  |
| KOH49748.1 | SCP160p RNA-binding G protein effector of mating response pathway [ <i>Saccharomyces boulardii</i> ]            | 134.7 | 847.62 | 21.69 | 2 | 21 | 21 | 26 | 1222 | 5.85  |
| KQC44537.1 | Ribosomal 60S subunit protein L27A [ <i>Saccharomyces boulardii</i> ]                                           | 15.2  | 843.69 | 53.38 | 2 | 8  | 8  | 23 | 133  | 10.35 |
| KQC40863.1 | Ribosomal 60S subunit protein L20B [ <i>Saccharomyces boulardii</i> ]                                           | 20.7  | 835.11 | 45.40 | 2 | 9  | 9  | 21 | 174  | 10.26 |
| KQC45530.1 | Plasma membrane protein [ <i>Saccharomyces boulardii</i> ]                                                      | 75.3  | 820.98 | 34.03 | 1 | 20 | 20 | 26 | 667  | 5.81  |
| KQC43795.1 | Mitochondrial and cytoplasmic valyl-tRNA synthetase [ <i>Saccharomyces boulardii</i> ]                          | 120.1 | 813.11 | 21.36 | 1 | 20 | 20 | 26 | 1058 | 6.33  |
| KQC42182.1 | Cytosolic serine hydroxymethyltransferase [ <i>Saccharomyces boulardii</i> ]                                    | 52.2  | 809.79 | 33.90 | 1 | 14 | 15 | 27 | 469  | 7.43  |
| KQC43627.1 | Endo-beta-1,3-glucanase [ <i>Saccharomyces boulardii</i> ]                                                      | 34.1  | 801.30 | 23.32 | 1 | 6  | 6  | 17 | 313  | 4.51  |
| KQC45597.1 | Glycolytic enzyme phosphoglucose isomerase [ <i>Saccharomyces boulardii</i> ]                                   | 61.3  | 787.14 | 19.13 | 1 | 7  | 7  | 25 | 554  | 6.46  |
| KQC44232.1 | Poly(A) binding protein [ <i>Saccharomyces boulardii</i> ]                                                      | 64.3  | 787.13 | 25.82 | 1 | 11 | 11 | 18 | 577  | 5.97  |
| KQC44054.1 | Fatty-acyl coenzyme A oxidase [ <i>Saccharomyces boulardii</i> ]                                                | 83.9  | 786.94 | 21.12 | 1 | 13 | 13 | 20 | 748  | 8.38  |
| KQC44957.1 | Plasma membrane ATP-binding cassette (ABC) transporter [ <i>Saccharomyces boulardii</i> ]                       | 168.6 | 778.35 | 15.99 | 3 | 17 | 17 | 18 | 1501 | 7.69  |
| KOH51464.1 | NOP1p Histone glutamine methyltransferase, modifies H2A at Q105 in nucleolus [ <i>Saccharomyces boulardii</i> ] | 32.9  | 776.08 | 27.51 | 4 | 9  | 9  | 25 | 309  | 9.99  |
| KQC42345.1 | hypothetical protein AB282_03527 [ <i>Saccharomyces boulardii</i> ]                                             | 27.3  | 773.44 | 32.91 | 1 | 6  | 6  | 22 | 234  | 5.11  |
| KQC45600.1 | putative mannosyltransferase involved in protein glycosylation [ <i>Saccharomyces boulardii</i> ]               | 54.5  | 768.18 | 38.36 | 2 | 12 | 12 | 16 | 464  | 4.83  |
| KQC44388.1 | RPS24Ap component of the small (40S) ribosomal subunit [ <i>Saccharomyces boulardii</i> ]                       | 15.3  | 763.70 | 37.04 | 2 | 5  | 5  | 21 | 135  | 10.51 |
| KQC43994.1 | Ribosomal 60S subunit protein L1A [ <i>Saccharomyces boulardii</i> ]                                            | 24.5  | 763.61 | 31.80 | 1 | 8  | 8  | 20 | 217  | 9.72  |
| KQC45268.1 | hypothetical protein AB282_00540 [ <i>Saccharomyces boulardii</i> ]                                             | 26.3  | 762.80 | 46.56 | 1 | 7  | 7  | 14 | 247  | 8.19  |
| KQC43265.1 | hypothetical protein AB282_01341 [ <i>Saccharomyces boulardii</i> ]                                             | 19.2  | 762.65 | 62.80 | 1 | 9  | 9  | 29 | 164  | 7.39  |
| KQC42964.1 | ATP sulfurylase [ <i>Saccharomyces boulardii</i> ]                                                              | 57.7  | 758.96 | 14.87 | 1 | 6  | 6  | 21 | 511  | 5.82  |
| KOH52307.1 | RPL19Ap Ribosomal 60S subunit protein L19A [ <i>Saccharomyces boulardii</i> ]                                   | 21.5  | 755.99 | 32.09 | 4 | 6  | 6  | 16 | 187  | 11.12 |
| KQC41387.1 | Subunit of mitochondrial NAD(+)-dependent isocitrate dehydrogenase [ <i>Saccharomyces boulardii</i> ]           | 39.3  | 753.24 | 35.00 | 1 | 10 | 10 | 25 | 360  | 9.00  |
| KQC45244.1 | RPS14Ap component of the small (40S) ribosomal subunit [ <i>Saccharomyces boulardii</i> ]                       | 14.5  | 745.71 | 61.31 | 2 | 7  | 7  | 22 | 137  | 10.73 |
| KQC44220.1 | 14-3-3 protein, major isoform [ <i>Saccharomyces boulardii</i> ]                                                | 30.1  | 740.58 | 41.20 | 1 | 3  | 9  | 19 | 267  | 4.88  |
| KQC43740.1 | Cystathionine beta-synthase [ <i>Saccharomyces boulardii</i> ]                                                  | 56.0  | 738.85 | 38.26 | 1 | 15 | 15 | 25 | 507  | 6.70  |
| KQC45011.1 | GDP-mannose pyrophosphorylase (mannose-1-phosphate guanyltransferase) [ <i>Saccharomyces boulardii</i> ]        | 39.6  | 733.22 | 47.65 | 1 | 5  | 13 | 22 | 361  | 6.34  |
| KQC42759.1 | ATPase of the 19S regulatory particle of the 26S proteasome [ <i>Saccharomyces boulardii</i> ]                  | 52.0  | 729.72 | 37.26 | 1 | 14 | 15 | 31 | 467  | 5.47  |
| KQC44933.1 | Lysyl-tRNA synthetase [ <i>Saccharomyces boulardii</i> ]                                                        | 67.9  | 722.61 | 27.24 | 1 | 14 | 14 | 20 | 591  | 6.13  |
| KQC45026.1 | Ribosomal 60S subunit protein L31B [ <i>Saccharomyces boulardii</i> ]                                           | 12.9  | 721.79 | 31.86 | 1 | 1  | 3  | 25 | 113  | 9.99  |

|            |                                                                                                              |       |        |       |   |    |    |    |      |       |
|------------|--------------------------------------------------------------------------------------------------------------|-------|--------|-------|---|----|----|----|------|-------|
| KQC45850.1 | RPS4Ap component of the small (40S) ribosomal subunit<br>[ <i>Saccharomyces boulardii</i> ]                  | 48.8  | 719.83 | 24.03 | 1 | 7  | 7  | 13 | 437  | 6.04  |
| KQC43922.1 | ATPase of the 19S regulatory particle of the 26S proteasome<br>[ <i>Saccharomyces boulardii</i> ]            | 45.2  | 714.22 | 31.36 | 1 | 10 | 11 | 21 | 405  | 9.01  |
| KQC45376.1 | Core subunit of the ubiquinol-cytochrome c reductase complex<br>[ <i>Saccharomyces boulardii</i> ]           | 50.2  | 711.31 | 33.04 | 1 | 13 | 13 | 19 | 457  | 7.30  |
| KQC44701.1 | Translational repressor with a role in polar growth and wall integrity<br>[ <i>Saccharomyces boulardii</i> ] | 139.9 | 708.72 | 19.12 | 1 | 14 | 15 | 17 | 1250 | 7.64  |
| KQC44056.1 | Subunit of the heterodimeric FACT complex (Spt16p-Pob3p)<br>[ <i>Saccharomyces boulardii</i> ]               | 118.6 | 708.33 | 17.78 | 1 | 15 | 16 | 20 | 1035 | 5.12  |
| KQC43546.1 | Non-ATPase base subunit of the 19S RP of the 26S proteasome<br>[ <i>Saccharomyces boulardii</i> ]            | 109.5 | 705.34 | 15.91 | 1 | 13 | 13 | 19 | 993  | 4.63  |
| KQC43683.1 | Major karyopherin [ <i>Saccharomyces boulardii</i> ]                                                         | 124.1 | 701.38 | 19.19 | 1 | 18 | 18 | 21 | 1084 | 5.48  |
| KQC42388.1 | Aconitase [ <i>Saccharomyces boulardii</i> ]                                                                 | 85.3  | 701.22 | 27.76 | 9 | 16 | 17 | 21 | 778  | 7.93  |
| KQC44868.1 | 14-3-3 protein, minor isoform [ <i>Saccharomyces boulardii</i> ]                                             | 31.0  | 700.44 | 35.53 | 1 | 2  | 8  | 18 | 273  | 4.88  |
| KQC42156.1 | Ribosomal 60S subunit protein L15A [ <i>Saccharomyces boulardii</i> ]                                        | 24.4  | 698.96 | 43.63 | 1 | 2  | 10 | 23 | 204  | 11.39 |
| KQC43643.1 | Methionyl-tRNA synthetase [ <i>Saccharomyces boulardii</i> ]                                                 | 85.6  | 698.91 | 23.17 | 1 | 14 | 15 | 18 | 751  | 6.61  |
| KQC42663.1 | UDP-glucose pyrophosphorylase (UGPase) [ <i>Saccharomyces boulardii</i> ]                                    | 56.2  | 698.72 | 31.34 | 1 | 14 | 14 | 20 | 501  | 7.44  |
| KQC44417.1 | RPS8Bp component of the small (40S) ribosomal subunit<br>[ <i>Saccharomyces boulardii</i> ]                  | 22.5  | 698.51 | 43.00 | 2 | 8  | 8  | 17 | 200  | 10.74 |
| KQC44193.1 | Rab family GTPase [ <i>Saccharomyces boulardii</i> ]                                                         | 23.2  | 696.87 | 50.00 | 1 | 7  | 9  | 12 | 206  | 5.33  |
| KQC43687.1 | Ribosomal 40S subunit protein S0A [ <i>Saccharomyces boulardii</i> ]                                         | 28.0  | 687.54 | 56.35 | 1 | 2  | 8  | 20 | 252  | 4.72  |
| KQC45035.1 | Component of the TREX complex required for nuclear mRNA export<br>[ <i>Saccharomyces boulardii</i> ]         | 50.2  | 682.43 | 24.22 | 1 | 10 | 10 | 15 | 446  | 5.52  |
| KOH51201.1 | GLC3p Glycogen branching enzyme, involved in glycogen<br>accumulation [ <i>Saccharomyces boulardii</i> ]     | 81.1  | 679.18 | 15.48 | 2 | 10 | 10 | 19 | 704  | 6.28  |
| KQC44029.1 | Evolutionarily-conserved 5'-3' exonuclease [ <i>Saccharomyces boulardii</i> ]                                | 175.4 | 673.69 | 13.02 | 1 | 17 | 17 | 20 | 1528 | 7.55  |
| KQC44326.1 | Medium chain fatty acyl-CoA synthetase [ <i>Saccharomyces boulardii</i> ]                                    | 83.4  | 672.83 | 19.49 | 1 | 11 | 11 | 14 | 744  | 7.74  |
| KQC41875.1 | Ribosomal 60S subunit protein L15B [ <i>Saccharomyces boulardii</i> ]                                        | 24.4  | 671.01 | 38.73 | 1 | 1  | 9  | 21 | 204  | 11.39 |
| KQC43509.1 | Hsp70 protein that interacts with Zuo1p [ <i>Saccharomyces boulardii</i> ]                                   | 58.2  | 669.03 | 30.67 | 1 | 14 | 14 | 16 | 538  | 5.05  |
| KQC43671.1 | Nitric oxide oxidoreductase [ <i>Saccharomyces boulardii</i> ]                                               | 44.6  | 666.53 | 19.55 | 1 | 6  | 6  | 19 | 399  | 6.28  |
| KQC41247.1 | RPS19Ap component of the small (40S) ribosomal subunit<br>[ <i>Saccharomyces boulardii</i> ]                 | 15.9  | 665.04 | 46.53 | 2 | 6  | 6  | 14 | 144  | 9.61  |
| KQC42088.1 | Transporter of the ATP-binding cassette (ABC) family<br>[ <i>Saccharomyces boulardii</i> ]                   | 189.0 | 661.28 | 9.75  | 1 | 13 | 13 | 16 | 1661 | 8.09  |
| KQC45430.1 | Cytoplasmic inorganic pyrophosphatase (PPase) [ <i>Saccharomyces boulardii</i> ]                             | 32.3  | 656.38 | 52.61 | 1 | 10 | 11 | 17 | 287  | 5.58  |
| KQC44282.1 | Translation elongation factor eIF-5A [ <i>Saccharomyces boulardii</i> ]                                      | 17.1  | 653.28 | 29.30 | 2 | 4  | 4  | 13 | 157  | 4.96  |
| KQC40937.1 | Transcriptional modulator [ <i>Saccharomyces boulardii</i> ]                                                 | 48.4  | 647.14 | 25.63 | 1 | 8  | 8  | 13 | 437  | 5.36  |
| KQC40963.1 | Component of mRNP complex [ <i>Saccharomyces boulardii</i> ]                                                 | 54.6  | 645.32 | 28.30 | 1 | 12 | 12 | 17 | 470  | 9.19  |
| KQC45147.1 | Reticulon protein [ <i>Saccharomyces boulardii</i> ]                                                         | 44.3  | 644.96 | 30.53 | 1 | 10 | 10 | 16 | 393  | 9.22  |
| KQC41979.1 | RNA binding protein [ <i>Saccharomyces boulardii</i> ]                                                       | 193.0 | 643.65 | 12.38 | 1 | 19 | 20 | 23 | 1729 | 6.21  |
| KQC43321.1 | hypothetical protein AB282_01398 [ <i>Saccharomyces boulardii</i> ]                                          | 114.3 | 639.38 | 17.75 | 1 | 14 | 14 | 22 | 1014 | 7.14  |



|            |                                                                                                           |       |        |       |   |    |    |    |      |       |
|------------|-----------------------------------------------------------------------------------------------------------|-------|--------|-------|---|----|----|----|------|-------|
| KQC45139.1 | Component of the Sec13p-Sec31p complex of the COPII vesicle coat [ <i>Saccharomyces boulardii</i> ]       | 138.7 | 638.87 | 10.13 | 1 | 8  | 8  | 11 | 1273 | 5.72  |
| KQC42129.1 | Dynamin-related GTPase involved in mitochondrial organization [ <i>Saccharomyces boulardii</i> ]          | 84.9  | 637.20 | 23.78 | 2 | 12 | 13 | 14 | 757  | 5.52  |
| KQC41007.1 | RNA polymerase II second largest subunit B150 [ <i>Saccharomyces boulardii</i> ]                          | 138.7 | 633.66 | 10.87 | 1 | 9  | 9  | 17 | 1224 | 6.52  |
| KQC42432.1 | Transaldolase [ <i>Saccharomyces boulardii</i> ]                                                          | 37.0  | 633.30 | 41.79 | 1 | 12 | 12 | 15 | 335  | 6.11  |
| KQC40852.1 | Type V myosin motor [ <i>Saccharomyces boulardii</i> ]                                                    | 180.6 | 633.11 | 11.69 | 2 | 14 | 14 | 16 | 1574 | 6.32  |
| KOH51885.1 | RPS17Bp Ribosomal protein 51 (rp51) of the small (40s) subunit [ <i>Saccharomyces boulardii</i> ]         | 15.7  | 631.61 | 51.85 | 2 | 1  | 7  | 16 | 135  | 10.43 |
| KQC44945.1 | Cytosolic seryl-tRNA synthetase [ <i>Saccharomyces boulardii</i> ]                                        | 53.3  | 629.93 | 28.57 | 1 | 10 | 10 | 16 | 462  | 6.09  |
| KQC42048.1 | Glucose-repressible alcohol dehydrogenase II [ <i>Saccharomyces boulardii</i> ]                           | 36.7  | 627.59 | 27.30 | 2 | 6  | 9  | 16 | 348  | 6.74  |
| KQC42707.1 | Mitochondrial malate dehydrogenase [ <i>Saccharomyces boulardii</i> ]                                     | 35.6  | 626.71 | 35.03 | 1 | 8  | 8  | 14 | 334  | 8.47  |
| KQC40845.1 | Subunit of the APT subcomplex of cleavage and polyadenylation factor [ <i>Saccharomyces boulardii</i> ]   | 107.2 | 623.75 | 24.11 | 1 | 19 | 19 | 20 | 958  | 5.60  |
| KQC42198.1 | Ribosomal 60S subunit protein L10 [ <i>Saccharomyces boulardii</i> ]                                      | 25.3  | 623.09 | 19.91 | 1 | 5  | 5  | 29 | 221  | 10.02 |
| KQC41760.1 | Component of the universally conserved Spt4/5 complex (DSIF complex) [ <i>Saccharomyces boulardii</i> ]   | 114.4 | 620.65 | 13.96 | 1 | 10 | 10 | 13 | 1053 | 5.39  |
| KQC40881.1 | RPS10Ap component of the small (40S) ribosomal subunit [ <i>Saccharomyces boulardii</i> ]                 | 12.7  | 620.64 | 57.14 | 2 | 4  | 4  | 20 | 105  | 8.79  |
| KQC40911.1 | ATPase of the 19S regulatory particle of the 26S proteasome [ <i>Saccharomyces boulardii</i> ]            | 49.4  | 616.37 | 22.65 | 1 | 10 | 10 | 21 | 437  | 5.73  |
| KQC40859.1 | Long chain fatty acyl-CoA synthetase [ <i>Saccharomyces boulardii</i> ]                                   | 77.8  | 615.51 | 23.43 | 1 | 13 | 13 | 18 | 700  | 7.62  |
| KQC41360.1 | Type II HSP40 co-chaperone that interacts with the HSP70 protein Ssa1p [ <i>Saccharomyces boulardii</i> ] | 38.3  | 614.24 | 27.58 | 1 | 7  | 7  | 15 | 359  | 9.03  |
| KQC42172.1 | RPS0Bp component of the small (40S) ribosomal subunit [ <i>Saccharomyces boulardii</i> ]                  | 27.9  | 613.95 | 56.35 | 1 | 2  | 8  | 19 | 252  | 4.75  |
| KQC41761.1 | Delta(24)-sterol C-methyltransferase [ <i>Saccharomyces boulardii</i> ]                                   | 43.4  | 613.48 | 34.99 | 1 | 11 | 11 | 16 | 383  | 5.77  |
| KQC41811.1 | Constituent of 66S pre-ribosomal particle [ <i>Saccharomyces boulardii</i> ]                              | 91.6  | 607.27 | 18.84 | 1 | 11 | 11 | 18 | 807  | 5.16  |
| KQC44585.1 | Ribosomal 60S subunit protein L12A [ <i>Saccharomyces boulardii</i> ]                                     | 17.8  | 602.08 | 47.88 | 1 | 6  | 6  | 14 | 165  | 9.41  |
| KQC43996.1 | Essential beta'-coat protein of the COPI coatomer [ <i>Saccharomyces boulardii</i> ]                      | 99.4  | 601.84 | 24.52 | 9 | 17 | 18 | 19 | 889  | 4.74  |
| KQC41112.1 | Hsp90 cochaperone [ <i>Saccharomyces boulardii</i> ]                                                      | 66.3  | 599.42 | 25.98 | 1 | 11 | 11 | 14 | 589  | 5.59  |
| KQC45403.1 | Type I transmembrane sorting receptor for multiple vacuolar hydrolase [ <i>Saccharomyces boulardii</i> ]  | 177.4 | 597.03 | 10.46 | 3 | 15 | 15 | 19 | 1577 | 4.92  |
| KQC42478.1 | Ribosomal 60S subunit protein L31B [ <i>Saccharomyces boulardii</i> ]                                     | 13.0  | 595.85 | 31.86 | 1 | 1  | 3  | 19 | 113  | 9.99  |
| KQC43801.1 | Cytosolic catalase T [ <i>Saccharomyces boulardii</i> ]                                                   | 64.5  | 595.80 | 27.58 | 1 | 10 | 10 | 16 | 562  | 6.44  |
| KQC44177.1 | Alpha subunit of cytoplasmic phenylalanyl-tRNA synthetase [ <i>Saccharomyces boulardii</i> ]              | 57.4  | 593.64 | 24.25 | 1 | 9  | 9  | 12 | 503  | 5.78  |
| KQC44938.1 | PST2p with similarity to a family of flavodoxin-like protein [ <i>Saccharomyces boulardii</i> ]           | 20.9  | 591.49 | 45.45 | 1 | 5  | 5  | 10 | 198  | 5.49  |
| KQC44556.1 | RPS18Bp component of the small (40S) ribosomal subunit [ <i>Saccharomyces boulardii</i> ]                 | 17.0  | 583.54 | 43.84 | 1 | 7  | 7  | 15 | 146  | 10.27 |
| KQC41658.1 | NADH:ubiquinone oxidoreductase [ <i>Saccharomyces boulardii</i> ]                                         | 57.3  | 582.49 | 25.73 | 1 | 10 | 10 | 18 | 513  | 9.44  |

|            |                                                                                                           |       |        |       |   |    |    |    |      |       |
|------------|-----------------------------------------------------------------------------------------------------------|-------|--------|-------|---|----|----|----|------|-------|
| KOH48793.1 | RPS17Ap Ribosomal protein 51 (rp51) of the small (40s) subunit [ <i>Saccharomyces boulardii</i> ]         | 16.2  | 580.10 | 50.72 | 2 | 1  | 7  | 15 | 138  | 10.33 |
| KQC43697.1 | Cytoplasmic trifunctional enzyme C1-tetrahydrofolate synthase [ <i>Saccharomyces boulardii</i> ]          | 102.0 | 579.08 | 17.34 | 3 | 15 | 15 | 17 | 946  | 6.76  |
| KQC44410.1 | Beta 3 subunit of the 20S proteasome [ <i>Saccharomyces boulardii</i> ]                                   | 22.6  | 578.79 | 14.15 | 1 | 2  | 2  | 8  | 205  | 5.15  |
| KQC44728.1 | Oligomeric mitochondrial matrix chaperone [ <i>Saccharomyces boulardii</i> ]                              | 81.7  | 578.57 | 21.32 | 1 | 10 | 12 | 15 | 727  | 6.04  |
| KQC45808.1 | Outer mitochondrial carnitine acetyltransferase [ <i>Saccharomyces boulardii</i> ]                        | 77.7  | 572.32 | 14.56 | 1 | 8  | 8  | 15 | 687  | 6.93  |
| KQC43966.1 | Ribosomal 60S subunit protein L28 [ <i>Saccharomyces boulardii</i> ]                                      | 16.7  | 572.25 | 34.23 | 1 | 5  | 5  | 22 | 149  | 10.62 |
| KQC42287.1 | S-adenosylmethionine synthetase [ <i>Saccharomyces boulardii</i> ]                                        | 41.8  | 567.08 | 26.96 | 1 | 3  | 8  | 12 | 382  | 5.22  |
| KQC42485.1 | Plasma membrane protein with a role in cell wall integrity [ <i>Saccharomyces boulardii</i> ]             | 24.1  | 565.67 | 14.81 | 1 | 2  | 2  | 23 | 216  | 8.73  |
| KQC43650.1 | 6-phosphogluconate dehydrogenase (decarboxylating) [ <i>Saccharomyces boulardii</i> ]                     | 53.9  | 563.77 | 32.93 | 1 | 11 | 14 | 20 | 492  | 7.30  |
| KQC45620.1 | Oxalyl-CoA synthetase [ <i>Saccharomyces boulardii</i> ]                                                  | 60.4  | 563.69 | 20.63 | 3 | 10 | 10 | 15 | 543  | 9.20  |
| KQC44746.1 | Essential beta-coat protein of the COPI coatomer [ <i>Saccharomyces boulardii</i> ]                       | 108.9 | 563.12 | 16.24 | 1 | 13 | 13 | 16 | 973  | 5.68  |
| KQC44605.1 | ATPase of the 19S regulatory particle of the 26S proteasome [ <i>Saccharomyces boulardii</i> ]            | 47.9  | 558.00 | 16.59 | 1 | 6  | 6  | 15 | 428  | 5.53  |
| KQC41796.1 | Component of the eisosome required for proper eisosome assembly [ <i>Saccharomyces boulardii</i> ]        | 93.3  | 556.58 | 14.71 | 1 | 11 | 11 | 14 | 843  | 6.27  |
| KQC40392.1 | Ribosomal 60S subunit protein L36B [ <i>Saccharomyces boulardii</i> ]                                     | 11.1  | 550.32 | 46.00 | 2 | 5  | 5  | 15 | 100  | 11.59 |
| KQC41410.1 | Type I HSP40 co-chaperone [ <i>Saccharomyces boulardii</i> ]                                              | 44.6  | 549.29 | 26.41 | 1 | 9  | 9  | 18 | 409  | 6.30  |
| KQC44805.1 | Translation termination factor eRF3 [ <i>Saccharomyces boulardii</i> ]                                    | 76.6  | 547.62 | 17.23 | 1 | 9  | 10 | 14 | 685  | 6.86  |
| KQC44508.1 | S-adenosylmethionine synthetase [ <i>Saccharomyces boulardii</i> ]                                        | 42.2  | 547.36 | 30.99 | 1 | 4  | 9  | 13 | 384  | 5.38  |
| KQC42453.1 | Fructose-1,6-bisphosphatase [ <i>Saccharomyces boulardii</i> ]                                            | 38.2  | 546.88 | 27.59 | 1 | 8  | 8  | 12 | 348  | 6.01  |
| KQC44573.1 | eIF3g subunit of the eukaryotic translation initiation factor 3 (eIF3) [ <i>Saccharomyces boulardii</i> ] | 30.5  | 546.03 | 25.91 | 1 | 5  | 5  | 11 | 274  | 6.81  |
| KQC43553.1 | hypothetical protein AB282_02549 [ <i>Saccharomyces boulardii</i> ]                                       | 77.4  | 541.74 | 18.58 | 1 | 10 | 10 | 14 | 689  | 6.40  |
| KQC45029.1 | Peroxisomal malate dehydrogenase [ <i>Saccharomyces boulardii</i> ]                                       | 37.2  | 540.85 | 32.36 | 1 | 8  | 8  | 18 | 343  | 9.20  |
| KQC43604.1 | Glycerol kinase [ <i>Saccharomyces boulardii</i> ]                                                        | 75.7  | 537.60 | 18.20 | 1 | 12 | 12 | 19 | 676  | 6.98  |
| KQC41874.1 | Enzyme of 'de novo' purine biosynthesis [ <i>Saccharomyces boulardii</i> ]                                | 65.2  | 537.32 | 21.28 | 1 | 7  | 11 | 14 | 592  | 6.55  |
| KQC42761.1 | Flavoprotein subunit of succinate dehydrogenase [ <i>Saccharomyces boulardii</i> ]                        | 70.2  | 533.91 | 16.09 | 1 | 7  | 8  | 18 | 640  | 7.49  |
| KQC42993.1 | Ribonucleotide-diphosphate reductase (RNR), small subunit [ <i>Saccharomyces boulardii</i> ]              | 46.1  | 533.65 | 23.81 | 1 | 9  | 9  | 14 | 399  | 5.19  |
| KQC42297.1 | eIF3j component of translation initiation factor 3 (eIF3) [ <i>Saccharomyces boulardii</i> ]              | 29.5  | 533.34 | 31.32 | 1 | 6  | 6  | 11 | 265  | 5.16  |
| KQC44354.1 | S-adenosyl-L-homocysteine hydrolase [ <i>Saccharomyces boulardii</i> ]                                    | 49.1  | 529.28 | 26.73 | 1 | 10 | 10 | 17 | 449  | 6.24  |
| KQC43281.1 | Subunit of the 26S proteasome [ <i>Saccharomyces boulardii</i> ]                                          | 104.2 | 528.07 | 15.56 | 1 | 15 | 16 | 17 | 945  | 6.18  |
| KQC42850.1 | Sulfite reductase beta subunit [ <i>Saccharomyces boulardii</i> ]                                         | 161.1 | 528.00 | 11.23 | 2 | 10 | 11 | 14 | 1442 | 5.49  |
| KQC44656.1 | arginyl-tRNA synthetase [ <i>Saccharomyces boulardii</i> ]                                                | 69.5  | 527.67 | 26.03 | 2 | 14 | 15 | 18 | 607  | 6.74  |
| KQC41614.1 | Ribosomal 60S subunit protein L14B [ <i>Saccharomyces boulardii</i> ]                                     | 20.6  | 523.07 | 39.25 | 1 | 7  | 8  | 19 | 186  | 11.71 |

|            |                                                                                                                |       |        |       |   |    |    |    |      |       |
|------------|----------------------------------------------------------------------------------------------------------------|-------|--------|-------|---|----|----|----|------|-------|
| KOH51431.1 | PSA1p GDP-mannose pyrophosphorylase (mannose-1-phosphate guanyltransferase) [ <i>Saccharomyces boulardii</i> ] | 34.1  | 522.96 | 39.29 | 1 | 1  | 9  | 14 | 308  | 5.97  |
| KQC44438.1 | E3 ubiquitin ligase of NEDD4 family [ <i>Saccharomyces boulardii</i> ]                                         | 91.8  | 521.32 | 18.79 | 1 | 10 | 10 | 13 | 809  | 6.70  |
| KQC43096.1 | Translation initiation factor eIF4A [ <i>Saccharomyces boulardii</i> ]                                         | 44.7  | 521.25 | 27.09 | 1 | 8  | 8  | 13 | 395  | 5.12  |
| KQC40406.1 | ATP-dependent DNA helicase, also known as reptin [ <i>Saccharomyces boulardii</i> ]                            | 51.6  | 517.35 | 14.44 | 1 | 7  | 7  | 19 | 471  | 5.31  |
| KQC41413.1 | Ribosomal 60S subunit protein L9B [ <i>Saccharomyces boulardii</i> ]                                           | 21.6  | 513.39 | 42.93 | 2 | 9  | 9  | 15 | 191  | 9.66  |
| KQC42615.1 | Carboxy-terminal domain (CTD) phosphatase [ <i>Saccharomyces boulardii</i> ]                                   | 60.9  | 513.04 | 27.27 | 1 | 10 | 10 | 12 | 539  | 6.60  |
| KQC43337.1 | Subunit beta of the cytosolic chaperonin Cct ring complex [ <i>Saccharomyces boulardii</i> ]                   | 57.2  | 512.31 | 16.51 | 1 | 7  | 7  | 10 | 527  | 6.11  |
| KQC44575.1 | Non-ATPase regulatory subunit of the 26S proteasome [ <i>Saccharomyces boulardii</i> ]                         | 45.8  | 511.38 | 24.68 | 2 | 12 | 12 | 20 | 393  | 5.78  |
| KQC40682.1 | Transketolase [ <i>Saccharomyces boulardii</i> ]                                                               | 73.8  | 510.55 | 18.68 | 1 | 11 | 11 | 16 | 680  | 7.01  |
| KQC45428.1 | histone H4 [ <i>Saccharomyces boulardii</i> ]                                                                  | 11.4  | 508.74 | 40.78 | 1 | 4  | 4  | 15 | 103  | 11.36 |
| KQC41719.1 | Inosine monophosphate dehydrogenase [ <i>Saccharomyces boulardii</i> ]                                         | 56.4  | 507.88 | 17.56 | 1 | 2  | 6  | 11 | 524  | 8.00  |
| KQC44094.1 | Sensor of mitochondrial dysfunction [ <i>Saccharomyces boulardii</i> ]                                         | 65.6  | 502.79 | 15.14 | 1 | 7  | 7  | 10 | 588  | 8.12  |
| KQC40653.1 | Subunit H of the V1 peripheral membrane domain of V-ATPase [ <i>Saccharomyces boulardii</i> ]                  | 54.4  | 502.07 | 20.29 | 1 | 8  | 8  | 11 | 478  | 6.35  |
| KQC44838.1 | Vacuolar glutathione S-conjugate transporter [ <i>Saccharomyces boulardii</i> ]                                | 171.0 | 500.57 | 5.81  | 1 | 6  | 6  | 13 | 1515 | 8.41  |
| KQC44024.1 | High affinity Ca <sup>2+</sup> /Mn <sup>2+</sup> P-type ATPase [ <i>Saccharomyces boulardii</i> ]              | 104.5 | 499.37 | 12.53 | 1 | 10 | 11 | 14 | 950  | 5.68  |
| KQC42384.1 | Gamma-glutamyltranspeptidase [ <i>Saccharomyces boulardii</i> ]                                                | 69.6  | 498.43 | 13.22 | 1 | 9  | 9  | 22 | 628  | 5.60  |
| KQC43746.1 | Ribosomal 60S subunit protein L24B [ <i>Saccharomyces boulardii</i> ]                                          | 17.5  | 497.40 | 29.68 | 1 | 1  | 6  | 18 | 155  | 11.37 |
| KQC45405.1 | ACH1p with CoA transferase activity [ <i>Saccharomyces boulardii</i> ]                                         | 58.7  | 494.39 | 26.62 | 1 | 11 | 11 | 20 | 526  | 6.79  |
| KQC43774.1 | Ribosomal protein 28 (rp28) of the small (40S) ribosomal subunit [ <i>Saccharomyces boulardii</i> ]            | 16.0  | 489.69 | 35.86 | 1 | 4  | 4  | 9  | 145  | 10.73 |
| KQC40821.1 | eIF3b subunit of the eukaryotic translation initiation factor 3 (eIF3) [ <i>Saccharomyces boulardii</i> ]      | 83.6  | 486.89 | 19.42 | 1 | 12 | 12 | 16 | 726  | 5.59  |
| KQC41155.1 | hypothetical protein AB282_04597 [ <i>Saccharomyces boulardii</i> ]                                            | 60.9  | 486.31 | 24.14 | 1 | 9  | 9  | 10 | 551  | 6.47  |
| KQC41560.1 | Glucose-6-phosphate dehydrogenase (G6PD) [ <i>Saccharomyces boulardii</i> ]                                    | 57.4  | 486.15 | 18.85 | 1 | 7  | 7  | 10 | 504  | 6.43  |
| KQC41215.1 | hypothetical protein AB282_04657 [ <i>Saccharomyces boulardii</i> ]                                            | 112.5 | 483.36 | 9.89  | 1 | 7  | 7  | 13 | 991  | 8.56  |
| KQC42433.1 | Acetohydroxyacid reductoisomerase and mtDNA binding protein [ <i>Saccharomyces boulardii</i> ]                 | 44.3  | 483.30 | 30.89 | 1 | 10 | 10 | 13 | 395  | 9.04  |
| KQC41946.1 | hypothetical protein AB282_04010 [ <i>Saccharomyces boulardii</i> ]                                            | 126.5 | 483.24 | 11.67 | 1 | 10 | 10 | 14 | 1088 | 5.38  |
| KQC44110.1 | Beta 7 subunit of the 20S proteasome [ <i>Saccharomyces boulardii</i> ]                                        | 29.4  | 482.22 | 27.82 | 1 | 5  | 5  | 11 | 266  | 5.99  |
| KQC40809.1 | NADP(+)-dependent glutamate dehydrogenase [ <i>Saccharomyces boulardii</i> ]                                   | 49.5  | 481.30 | 22.47 | 1 | 4  | 7  | 11 | 454  | 5.69  |
| KQC43909.1 | Ribosomal 60S subunit protein L24A [ <i>Saccharomyces boulardii</i> ]                                          | 17.6  | 481.17 | 29.68 | 1 | 1  | 6  | 17 | 155  | 11.28 |
| KQC40382.1 | Translation initiation factor eIF5B [ <i>Saccharomyces boulardii</i> ]                                         | 53.1  | 479.60 | 23.77 | 1 | 8  | 8  | 15 | 488  | 8.25  |
| KQC42054.1 | eIF3c subunit of the eukaryotic translation initiation factor 3 (eIF3) [ <i>Saccharomyces boulardii</i> ]      | 93.2  | 477.40 | 12.93 | 1 | 9  | 9  | 11 | 812  | 5.00  |

|            |                                                                                                           |       |        |       |   |    |    |    |      |       |
|------------|-----------------------------------------------------------------------------------------------------------|-------|--------|-------|---|----|----|----|------|-------|
| KQC41870.1 | G-protein beta subunit and guanine dissociation inhibitor for Gpa2p [ <i>Saccharomyces boulardii</i> ]    | 34.8  | 477.27 | 27.59 | 1 | 10 | 10 | 14 | 319  | 6.24  |
| KQC41476.1 | CAP (cyclase-associated protein) [ <i>Saccharomyces boulardii</i> ]                                       | 57.5  | 475.58 | 24.52 | 1 | 9  | 9  | 11 | 526  | 5.64  |
| KQC42765.1 | Tetrameric phosphoglycerate mutase [ <i>Saccharomyces boulardii</i> ]                                     | 27.6  | 475.46 | 34.82 | 1 | 8  | 8  | 15 | 247  | 8.84  |
| KQC45337.1 | Ribosomal 60S subunit protein L32 [ <i>Saccharomyces boulardii</i> ]                                      | 14.8  | 474.10 | 33.85 | 1 | 5  | 5  | 13 | 130  | 11.17 |
| KQC44845.1 | Pentafunctional arom protein [ <i>Saccharomyces boulardii</i> ]                                           | 174.7 | 469.01 | 10.08 | 1 | 12 | 12 | 12 | 1588 | 6.28  |
| KQC45020.1 | Mitochondrial NADP-specific isocitrate dehydrogenase [ <i>Saccharomyces boulardii</i> ]                   | 48.2  | 463.84 | 28.50 | 1 | 8  | 10 | 13 | 428  | 8.76  |
| KQC45136.1 | ADP-ribosylation factor [ <i>Saccharomyces boulardii</i> ]                                                | 20.5  | 462.96 | 39.78 | 1 | 2  | 6  | 11 | 181  | 7.34  |
| KQC44095.1 | Hexokinase isoenzyme 2 [ <i>Saccharomyces boulardii</i> ]                                                 | 53.9  | 462.71 | 20.16 | 1 | 6  | 6  | 14 | 486  | 5.30  |
| KQC44526.1 | Alpha1,2-mannosyltransferase of the Golgi [ <i>Saccharomyces boulardii</i> ]                              | 51.4  | 462.46 | 26.47 | 1 | 10 | 11 | 14 | 442  | 5.40  |
| KQC45098.1 | Subunit of the CSN and 26S proteasome lid complex [ <i>Saccharomyces boulardii</i> ]                      | 51.8  | 460.56 | 22.70 | 1 | 9  | 9  | 10 | 445  | 6.13  |
| KQC41439.1 | RPS7Bp component of the small (40S) ribosomal subunit [ <i>Saccharomyces boulardii</i> ]                  | 21.6  | 459.66 | 38.95 | 1 | 4  | 7  | 14 | 190  | 9.95  |
| KQC40865.1 | NOP58p [ <i>Saccharomyces boulardii</i> ]                                                                 | 56.9  | 456.80 | 23.29 | 2 | 9  | 9  | 11 | 511  | 8.94  |
| KQC43984.1 | RPS2p component of the small (40S) subunit [ <i>Saccharomyces boulardii</i> ]                             | 27.4  | 448.76 | 43.31 | 1 | 8  | 8  | 15 | 254  | 10.43 |
| KQC43776.1 | Nucleosome remodeling protein [ <i>Saccharomyces boulardii</i> ]                                          | 168.2 | 448.04 | 8.75  | 1 | 10 | 10 | 13 | 1451 | 5.00  |
| KQC45491.1 | AAA ATPase and SNARE disassembly chaperone [ <i>Saccharomyces boulardii</i> ]                             | 84.0  | 447.19 | 19.26 | 2 | 10 | 11 | 11 | 758  | 7.99  |
| KQC44316.1 | GTPase [ <i>Saccharomyces boulardii</i> ]                                                                 | 57.6  | 446.59 | 23.85 | 1 | 10 | 10 | 15 | 520  | 8.88  |
| KQC44874.1 | Essential Fe-S protein [ <i>Saccharomyces boulardii</i> ]                                                 | 68.3  | 446.33 | 22.70 | 1 | 12 | 12 | 16 | 608  | 8.66  |
| KQC45118.1 | NAD(+)-dependent glutamate synthase (GOGAT) [ <i>Saccharomyces boulardii</i> ]                            | 238.0 | 443.63 | 5.92  | 2 | 9  | 11 | 14 | 2145 | 6.61  |
| KQC40630.1 | RNA polymerase I second largest subunit A135 [ <i>Saccharomyces boulardii</i> ]                           | 135.7 | 443.23 | 9.48  | 1 | 9  | 9  | 10 | 1203 | 7.65  |
| KQC43624.1 | Ribosome-associated chaperone [ <i>Saccharomyces boulardii</i> ]                                          | 49.0  | 441.47 | 24.71 | 1 | 8  | 8  | 10 | 433  | 8.25  |
| KQC44174.1 | Dihydroliipoamide dehydrogenase [ <i>Saccharomyces boulardii</i> ]                                        | 54.0  | 440.87 | 29.26 | 1 | 11 | 11 | 13 | 499  | 8.03  |
| KQC43839.1 | Transaldolase, enzyme in the non-oxidative pentose phosphate pathway [ <i>Saccharomyces boulardii</i> ]   | 37.2  | 433.22 | 27.93 | 1 | 8  | 8  | 10 | 333  | 6.38  |
| KQC41899.1 | eIF3i subunit of the eukaryotic translation initiation factor 3 (eIF3) [ <i>Saccharomyces boulardii</i> ] | 38.7  | 433.19 | 42.94 | 1 | 10 | 10 | 13 | 347  | 5.67  |
| KQC45462.1 | RPS11Bp component of the small (40S) ribosomal subunit [ <i>Saccharomyces boulardii</i> ]                 | 17.7  | 432.25 | 42.31 | 1 | 7  | 7  | 12 | 156  | 10.78 |
| KQC42419.1 | Conserved ribosomal protein P0 of the ribosomal stalk [ <i>Saccharomyces boulardii</i> ]                  | 33.7  | 432.06 | 29.49 | 1 | 9  | 9  | 14 | 312  | 4.79  |
| KQC40579.1 | One of two isoforms of the gamma subunit of eEF1B [ <i>Saccharomyces boulardii</i> ]                      | 47.1  | 425.02 | 20.72 | 1 | 5  | 7  | 12 | 415  | 8.38  |
| KQC40415.1 | ATP binding cassette protein [ <i>Saccharomyces boulardii</i> ]                                           | 134.3 | 423.38 | 12.63 | 1 | 12 | 12 | 16 | 1196 | 5.85  |
| KQC42387.1 | O-acetyl homoserine-O-acetyl serine sulfhydrylase [ <i>Saccharomyces boulardii</i> ]                      | 48.7  | 421.92 | 25.00 | 1 | 10 | 10 | 10 | 444  | 6.43  |
| KQC41998.1 | Glutamate decarboxylase [ <i>Saccharomyces boulardii</i> ]                                                | 65.9  | 421.79 | 12.14 | 1 | 5  | 5  | 15 | 585  | 6.62  |
| KQC42986.1 | Subunit of the cytosolic chaperonin Cct ring complex [ <i>Saccharomyces boulardii</i> ]                   | 58.8  | 421.05 | 22.47 | 1 | 10 | 10 | 12 | 534  | 6.11  |

|            |                                                                                                            |       |        |       |   |    |    |    |      |       |
|------------|------------------------------------------------------------------------------------------------------------|-------|--------|-------|---|----|----|----|------|-------|
| KQC42277.1 | ubiquitin-ribosomal 40S subunit protein S31 fusion protein<br>[ <i>Saccharomyces boulardii</i> ]           | 17.2  | 420.54 | 40.79 | 4 | 6  | 6  | 11 | 152  | 9.86  |
| KQC41589.1 | Glyoxylate reductase [ <i>Saccharomyces boulardii</i> ]                                                    | 38.8  | 420.26 | 35.71 | 1 | 9  | 9  | 11 | 350  | 6.34  |
| KQC45591.1 | RPS9Ap component of the small (40S) ribosomal subunit<br>[ <i>Saccharomyces boulardii</i> ]                | 22.3  | 417.15 | 32.31 | 1 | 1  | 7  | 16 | 195  | 10.05 |
| KQC40550.1 | RPS9Ap component of the small (40S) ribosomal subunit<br>[ <i>Saccharomyces boulardii</i> ]                | 23.0  | 415.11 | 32.18 | 1 | 1  | 7  | 15 | 202  | 9.85  |
| KQC41460.1 | Component of the TOM (translocase of outer membrane) complex<br>[ <i>Saccharomyces boulardii</i> ]         | 70.1  | 414.57 | 17.67 | 1 | 7  | 7  | 9  | 617  | 5.35  |
| KQC45088.1 | ADP-ribosylation factor [ <i>Saccharomyces boulardii</i> ]                                                 | 20.6  | 414.38 | 32.04 | 1 | 1  | 5  | 10 | 181  | 7.34  |
| KQC42007.1 | Regulatory subunit of trehalose-6-phosphate synthase/phosphatase<br>[ <i>Saccharomyces boulardii</i> ]     | 118.8 | 412.02 | 8.25  | 1 | 5  | 6  | 12 | 1054 | 6.33  |
| KQC43888.1 | Alpha 1 subunit of the 20S proteasome [ <i>Saccharomyces boulardii</i> ]                                   | 28.0  | 411.47 | 41.27 | 1 | 9  | 9  | 10 | 252  | 6.24  |
| KQC41721.1 | Cytochrome b2 (L-lactate cytochrome-c oxidoreductase)<br>[ <i>Saccharomyces boulardii</i> ]                | 65.5  | 409.90 | 19.63 | 2 | 9  | 10 | 16 | 591  | 8.41  |
| KQC41919.1 | Cytoplasmic aldehyde dehydrogenase [ <i>Saccharomyces boulardii</i> ]                                      | 55.4  | 408.31 | 21.74 | 1 | 4  | 9  | 9  | 506  | 5.76  |
| KQC44059.1 | Rab family GTPase involved in the exocytic pathway [ <i>Saccharomyces<br/>boulardii</i> ]                  | 24.5  | 403.60 | 38.74 | 1 | 3  | 7  | 9  | 222  | 5.49  |
| KQC45135.1 | Ribosomal 60S subunit protein L35A [ <i>Saccharomyces boulardii</i> ]                                      | 13.9  | 403.52 | 41.67 | 1 | 6  | 6  | 13 | 120  | 10.58 |
| KQC43322.1 | Catalytic subunit of the SWI/SNF chromatin remodeling complex<br>[ <i>Saccharomyces boulardii</i> ]        | 156.7 | 402.58 | 7.65  | 1 | 9  | 10 | 13 | 1359 | 6.71  |
| KQC45820.1 | Subunit of protein N-terminal acetyltransferase NatA [ <i>Saccharomyces<br/>boulardii</i> ]                | 98.9  | 401.67 | 13.58 | 1 | 12 | 12 | 13 | 854  | 8.78  |
| KQC45381.1 | Major CTP synthase isozyme (see also URA8) [ <i>Saccharomyces<br/>boulardii</i> ]                          | 64.7  | 401.53 | 13.99 | 1 | 6  | 6  | 8  | 579  | 6.01  |
| KQC40538.1 | putative GTPase [ <i>Saccharomyces boulardii</i> ]                                                         | 74.4  | 398.72 | 22.41 | 1 | 13 | 13 | 14 | 647  | 8.79  |
| KQC45267.1 | Citrate synthase [ <i>Saccharomyces boulardii</i> ]                                                        | 51.4  | 398.68 | 16.74 | 1 | 6  | 6  | 9  | 460  | 6.38  |
| KQC45574.1 | hypothetical protein AB282_00336 [ <i>Saccharomyces boulardii</i> ]                                        | 77.6  | 396.27 | 18.04 | 1 | 7  | 11 | 14 | 693  | 5.57  |
| KQC44400.1 | Threonine deaminase, catalyzes first step in isoleucine biosynthesis<br>[ <i>Saccharomyces boulardii</i> ] | 63.8  | 395.75 | 13.89 | 1 | 5  | 5  | 8  | 576  | 8.53  |
| KQC41864.1 | Hexadecenal dehydrogenase [ <i>Saccharomyces boulardii</i> ]                                               | 59.9  | 395.31 | 15.23 | 1 | 6  | 6  | 11 | 532  | 6.76  |
| KQC40513.1 | putative ATP-dependent RNA helicase of the DEAD-box protein<br>family [ <i>Saccharomyces boulardii</i> ]   | 67.9  | 394.62 | 13.94 | 1 | 4  | 8  | 12 | 617  | 8.87  |
| KQC41898.1 | Mitochondrial external NADH dehydrogenase [ <i>Saccharomyces<br/>boulardii</i> ]                           | 62.7  | 393.96 | 21.96 | 1 | 12 | 12 | 12 | 560  | 9.28  |
| KQC41862.1 | Acetolactate synthase [ <i>Saccharomyces boulardii</i> ]                                                   | 74.8  | 390.24 | 16.89 | 1 | 9  | 9  | 11 | 687  | 8.65  |
| KQC40551.1 | Ribosomal 60S subunit protein L21B [ <i>Saccharomyces boulardii</i> ]                                      | 18.3  | 390.15 | 40.00 | 2 | 9  | 9  | 15 | 160  | 10.39 |
| KQC44424.1 | Karyopherin beta [ <i>Saccharomyces boulardii</i> ]                                                        | 122.5 | 386.29 | 9.97  | 1 | 9  | 10 | 12 | 1113 | 4.63  |
| KQC43908.1 | Ribosomal 60S subunit protein L30 [ <i>Saccharomyces boulardii</i> ]                                       | 12.9  | 386.14 | 57.26 | 1 | 6  | 6  | 12 | 117  | 9.60  |
| KQC42816.1 | Phosphatidylinositol phosphate (PtdInsP) phosphatase [ <i>Saccharomyces<br/>boulardii</i> ]                | 71.1  | 385.76 | 17.82 | 1 | 8  | 8  | 10 | 623  | 7.71  |
| KQC45091.1 | RPS15p component of the small (40S) ribosomal subunit<br>[ <i>Saccharomyces boulardii</i> ]                | 187.0 | 381.52 | 7.70  | 3 | 11 | 12 | 12 | 1689 | 5.60  |
| KQC43536.1 | Delta-1-pyrroline-5-carboxylate dehydrogenase [ <i>Saccharomyces<br/>boulardii</i> ]                       | 64.4  | 376.50 | 24.87 | 1 | 12 | 12 | 14 | 575  | 7.49  |

|            |                                                                                                        |       |        |       |   |    |    |    |      |       |
|------------|--------------------------------------------------------------------------------------------------------|-------|--------|-------|---|----|----|----|------|-------|
| KQC42436.1 | Adenylosuccinate lyase [ <i>Saccharomyces boulardii</i> ]                                              | 54.5  | 376.39 | 19.29 | 1 | 9  | 9  | 9  | 482  | 6.43  |
| KQC44284.1 | P-type ATPase, ion transporter of the ER membrane [ <i>Saccharomyces boulardii</i> ]                   | 135.2 | 376.29 | 8.81  | 6 | 9  | 10 | 13 | 1215 | 6.60  |
| KQC45723.1 | Translation initiation factor eIF5B [ <i>Saccharomyces boulardii</i> ]                                 | 112.0 | 376.06 | 12.99 | 1 | 10 | 10 | 10 | 1001 | 5.80  |
| KQC44290.1 | Ubiquinol-cytochrome-c reductase [ <i>Saccharomyces boulardii</i> ]                                    | 23.3  | 373.73 | 33.02 | 1 | 4  | 4  | 8  | 215  | 8.07  |
| KQC43762.1 | hypothetical protein AB282_02018 [ <i>Saccharomyces boulardii</i> ]                                    | 92.6  | 373.46 | 10.54 | 1 | 7  | 7  | 9  | 816  | 5.03  |
| KQC45825.1 | NPC2p [ <i>Saccharomyces boulardii</i> ]                                                               | 19.0  | 371.78 | 22.54 | 1 | 3  | 3  | 8  | 173  | 4.44  |
| KQC43566.1 | Lanosterol 14-alpha-demethylase [ <i>Saccharomyces boulardii</i> ]                                     | 60.7  | 370.97 | 17.36 | 1 | 6  | 6  | 10 | 530  | 8.66  |
| KQC42380.1 | Ran GTPase [ <i>Saccharomyces boulardii</i> ]                                                          | 24.8  | 369.63 | 30.59 | 2 | 8  | 8  | 11 | 219  | 6.55  |
| KQC41447.1 | Alpha-isopropylmalate synthase (2-isopropylmalate synthase) [ <i>Saccharomyces boulardii</i> ]         | 68.4  | 368.23 | 15.83 | 2 | 7  | 7  | 8  | 619  | 6.01  |
| KQC42351.1 | Glycogen synthase [ <i>Saccharomyces boulardii</i> ]                                                   | 80.1  | 367.51 | 11.49 | 6 | 5  | 8  | 11 | 705  | 6.29  |
| KQC45555.1 | NADP+ dependent arabinose dehydrogenase [ <i>Saccharomyces boulardii</i> ]                             | 38.9  | 366.59 | 31.10 | 1 | 9  | 9  | 12 | 344  | 5.96  |
| KQC43477.1 | hypothetical protein AB282_02473 [ <i>Saccharomyces boulardii</i> ]                                    | 40.6  | 365.37 | 26.50 | 1 | 7  | 7  | 7  | 366  | 9.91  |
| KQC44199.1 | Phosphomannomutase [ <i>Saccharomyces boulardii</i> ]                                                  | 29.0  | 364.88 | 31.50 | 1 | 8  | 8  | 12 | 254  | 5.24  |
| KQC44759.1 | Histone H2B [ <i>Saccharomyces boulardii</i> ]                                                         | 14.2  | 364.69 | 25.95 | 2 | 4  | 4  | 11 | 131  | 10.10 |
| KQC41685.1 | Alpha 2 subunit of the 20S proteasome [ <i>Saccharomyces boulardii</i> ]                               | 27.1  | 364.59 | 21.60 | 1 | 4  | 4  | 8  | 250  | 5.72  |
| KQC41099.1 | ATP-dependent DEAD (Asp-Glu-Ala-Asp)-box RNA helicase [ <i>Saccharomyces boulardii</i> ]               | 53.9  | 364.42 | 15.15 | 1 | 6  | 6  | 8  | 482  | 7.43  |
| KQC45467.1 | hypothetical protein AB282_00229 [ <i>Saccharomyces boulardii</i> ]                                    | 38.7  | 363.99 | 16.57 | 1 | 3  | 5  | 10 | 344  | 9.19  |
| KQC40741.1 | SPN1p involved in RNA polymerase II transcription [ <i>Saccharomyces boulardii</i> ]                   | 46.1  | 363.83 | 22.44 | 1 | 6  | 6  | 7  | 410  | 7.52  |
| KQC43243.1 | Regulatory subunit of the cyclic AMP-dependent protein kinase (PKA) [ <i>Saccharomyces boulardii</i> ] | 47.2  | 363.51 | 23.56 | 1 | 7  | 7  | 9  | 416  | 7.94  |
| KQC41453.1 | ATP-dependent RNA helicase of the DEAD-box protein family [ <i>Saccharomyces boulardii</i> ]           | 60.8  | 360.25 | 18.93 | 1 | 9  | 10 | 14 | 544  | 8.66  |
| KQC42967.1 | Alpha subunit of the translation initiation factor eIF2 [ <i>Saccharomyces boulardii</i> ]             | 34.7  | 359.82 | 29.61 | 1 | 8  | 8  | 11 | 304  | 5.02  |
| KOH50702.1 | SCW11p Cell wall protein like glucanase [ <i>Saccharomyces boulardii</i> ]                             | 56.1  | 358.94 | 21.93 | 2 | 6  | 6  | 9  | 538  | 4.51  |
| KOH51324.1 | DLD1p D-lactate dehydrogenase [ <i>Saccharomyces boulardii</i> ]                                       | 65.2  | 358.05 | 17.21 | 2 | 7  | 7  | 10 | 587  | 6.83  |
| KQC42268.1 | STM1p required for optimal translation under nutrient stress [ <i>Saccharomyces boulardii</i> ]        | 30.0  | 356.53 | 29.30 | 1 | 5  | 5  | 9  | 273  | 9.66  |
| KQC45550.1 | Polypeptide release factor (eRF1) in translation termination [ <i>Saccharomyces boulardii</i> ]        | 49.0  | 355.83 | 19.91 | 1 | 6  | 6  | 9  | 437  | 5.05  |
| KQC44219.1 | E1 beta subunit of the pyruvate dehydrogenase (PDH) complex [ <i>Saccharomyces boulardii</i> ]         | 48.9  | 355.06 | 22.80 | 1 | 9  | 9  | 11 | 443  | 8.27  |
| KQC44487.1 | Subunit 7 of ubiquinol cytochrome-c reductase (Complex III) [ <i>Saccharomyces boulardii</i> ]         | 14.6  | 353.88 | 37.01 | 1 | 3  | 3  | 8  | 127  | 5.88  |
| KQC42718.1 | Cell wall mannoprotein [ <i>Saccharomyces boulardii</i> ]                                              | 24.3  | 352.72 | 32.22 | 1 | 6  | 6  | 7  | 239  | 4.67  |
| KQC44333.1 | Essential non-ATPase regulatory subunit of the 26S proteasome lid [ <i>Saccharomyces boulardii</i> ]   | 60.3  | 351.32 | 17.40 | 1 | 7  | 7  | 8  | 523  | 5.60  |
| KQC42588.1 | hypothetical protein AB282_03016 [ <i>Saccharomyces boulardii</i> ]                                    | 31.2  | 349.42 | 26.86 | 1 | 6  | 6  | 8  | 283  | 8.16  |

|            |                                                                                                                 |       |        |       |   |    |    |    |      |      |
|------------|-----------------------------------------------------------------------------------------------------------------|-------|--------|-------|---|----|----|----|------|------|
| KQC40399.1 | Core component of the signal recognition particle (SRP) complex [ <i>Saccharomyces boulardii</i> ]              | 68.9  | 346.22 | 18.20 | 1 | 8  | 8  | 8  | 599  | 8.75 |
| KQC43913.1 | Nicotinamidase that converts nicotinamide to nicotinic acid [ <i>Saccharomyces boulardii</i> ]                  | 25.0  | 344.18 | 29.63 | 1 | 5  | 5  | 9  | 216  | 6.27 |
| KQC41996.1 | Long chain fatty acyl-CoA synthetase [ <i>Saccharomyces boulardii</i> ]                                         | 77.2  | 342.96 | 14.12 | 2 | 9  | 9  | 11 | 694  | 6.55 |
| KQC42154.1 | Cytosolic aspartate aminotransferase involved in nitrogen metabolism [ <i>Saccharomyces boulardii</i> ]         | 46.0  | 342.21 | 19.86 | 1 | 7  | 7  | 7  | 418  | 8.32 |
| KQC45455.1 | Gamma subunit of the F1 sector of mitochondrial F1F0 ATP synthase [ <i>Saccharomyces boulardii</i> ]            | 34.3  | 341.38 | 28.30 | 1 | 7  | 7  | 8  | 311  | 9.31 |
| KQC40657.1 | Translation initiation factor eIF5 [ <i>Saccharomyces boulardii</i> ]                                           | 45.2  | 340.53 | 30.62 | 1 | 11 | 11 | 15 | 405  | 5.06 |
| KQC42093.1 | Iron-sulfur protein subunit of succinate dehydrogenase [ <i>Saccharomyces boulardii</i> ]                       | 30.2  | 339.69 | 27.44 | 1 | 7  | 7  | 8  | 266  | 8.82 |
| KQC42047.1 | Integral inner mitochondrial membrane protein [ <i>Saccharomyces boulardii</i> ]                                | 96.6  | 339.13 | 5.88  | 1 | 3  | 3  | 4  | 850  | 8.81 |
| KQC42155.1 | Enzyme of 'de novo' purine biosynthesis [ <i>Saccharomyces boulardii</i> ]                                      | 65.2  | 338.50 | 16.75 | 1 | 6  | 10 | 11 | 591  | 6.55 |
| KQC44803.1 | Chromatin associated high mobility group (HMG) family member [ <i>Saccharomyces boulardii</i> ]                 | 27.5  | 338.29 | 26.02 | 1 | 4  | 4  | 8  | 246  | 8.51 |
| KQC43719.1 | glucose deprivation induced stress granule component [ <i>Saccharomyces boulardii</i> ]                         | 78.8  | 337.43 | 14.96 | 1 | 7  | 7  | 8  | 722  | 6.90 |
| KQC44359.1 | Nuclear type II J heat shock protein [ <i>Saccharomyces boulardii</i> ]                                         | 44.8  | 337.30 | 21.23 | 1 | 6  | 6  | 7  | 391  | 5.80 |
| KQC41416.1 | Dihydrolipoamide acetyltransferase component (E2) of the PDC [ <i>Saccharomyces boulardii</i> ]                 | 51.8  | 335.34 | 17.63 | 1 | 8  | 8  | 11 | 482  | 7.80 |
| KQC44843.1 | Fimbrin, actin-bundling protein [ <i>Saccharomyces boulardii</i> ]                                              | 71.7  | 335.11 | 16.82 | 1 | 8  | 8  | 10 | 642  | 5.48 |
| KQC40847.1 | Subunit E of the V1 domain of the vacuolar H <sup>+</sup> -ATPase (V-ATPase) [ <i>Saccharomyces boulardii</i> ] | 26.5  | 334.87 | 36.48 | 1 | 8  | 8  | 9  | 233  | 5.36 |
| KQC41562.1 | Adaptor protein that links actin to clathrin and endocytosis [ <i>Saccharomyces boulardii</i> ]                 | 108.8 | 334.55 | 8.99  | 1 | 5  | 5  | 5  | 968  | 5.44 |
| KQC45361.1 | Mitochondrial peroxiredoxin with thioredoxin peroxidase activity [ <i>Saccharomyces boulardii</i> ]             | 29.5  | 334.55 | 38.31 | 1 | 7  | 7  | 8  | 261  | 8.87 |
| KQC41846.1 | Component of the RSC chromatin remodeling complex [ <i>Saccharomyces boulardii</i> ]                            | 49.6  | 333.25 | 19.77 | 1 | 7  | 7  | 9  | 435  | 4.96 |
| KQC42385.1 | Major exo-1,3-beta-glucanase of the cell wall [ <i>Saccharomyces boulardii</i> ]                                | 51.3  | 332.74 | 11.61 | 1 | 4  | 4  | 9  | 448  | 4.75 |
| KQC41863.1 | type I myosin motor [ <i>Saccharomyces boulardii</i> ]                                                          | 136.5 | 332.68 | 8.97  | 1 | 6  | 9  | 9  | 1215 | 9.28 |
| KQC43554.1 | Cytosolic asparaginyl-tRNA synthetase [ <i>Saccharomyces boulardii</i> ]                                        | 62.2  | 331.87 | 20.22 | 1 | 8  | 8  | 8  | 554  | 5.85 |
| KQC40775.1 | Glycogen debranching enzyme [ <i>Saccharomyces boulardii</i> ]                                                  | 174.9 | 331.47 | 7.29  | 1 | 9  | 9  | 10 | 1536 | 5.77 |
| KQC42282.1 | Pseudouridine synthase catalytic subunit of box H/ACA snoRNPs [ <i>Saccharomyces boulardii</i> ]                | 55.0  | 330.28 | 19.96 | 1 | 7  | 7  | 7  | 486  | 8.94 |
| KQC42568.1 | Glycerol-3-phosphate/dihydroxyacetone phosphate sn-1 acyltransferase [ <i>Saccharomyces boulardii</i> ]         | 83.6  | 330.26 | 13.59 | 1 | 8  | 8  | 12 | 743  | 9.48 |
| KQC45083.1 | Cullin [ <i>Saccharomyces boulardii</i> ]                                                                       | 94.0  | 329.74 | 12.88 | 1 | 8  | 8  | 14 | 815  | 8.32 |
| KQC41190.1 | Arginosuccinate synthetase [ <i>Saccharomyces boulardii</i> ]                                                   | 46.9  | 328.40 | 21.43 | 1 | 7  | 7  | 10 | 420  | 5.62 |
| KQC42052.1 | Beta-1,3-glucanosyltransferase [ <i>Saccharomyces boulardii</i> ]                                               | 59.5  | 327.04 | 8.23  | 1 | 4  | 4  | 6  | 559  | 4.67 |
| KQC41521.1 | membrane protein [ <i>Saccharomyces boulardii</i> ]                                                             | 25.1  | 325.80 | 41.26 | 1 | 7  | 7  | 11 | 223  | 9.72 |
| KQC45264.1 | Amphiphysin-like lipid raft protein [ <i>Saccharomyces boulardii</i> ]                                          | 30.2  | 325.36 | 23.02 | 1 | 5  | 5  | 7  | 265  | 6.62 |

|            |                                                                                                    |       |        |       |   |    |    |    |      |       |
|------------|----------------------------------------------------------------------------------------------------|-------|--------|-------|---|----|----|----|------|-------|
| KQC42814.1 | Ubiquitin activating enzyme (E1) [ <i>Saccharomyces boulardii</i> ]                                | 114.2 | 325.34 | 14.75 | 1 | 11 | 11 | 14 | 1024 | 5.11  |
| KQC41704.1 | Dihydroxyacetone kinase [ <i>Saccharomyces boulardii</i> ]                                         | 62.2  | 325.21 | 17.81 | 1 | 7  | 7  | 8  | 584  | 5.41  |
| KQC43587.1 | RPS20p component of the small (40S) ribosomal subunit [ <i>Saccharomyces boulardii</i> ]           | 13.9  | 324.91 | 29.75 | 1 | 3  | 3  | 10 | 121  | 9.52  |
| KQC41845.1 | hypothetical protein AB282_03909 [ <i>Saccharomyces boulardii</i> ]                                | 24.9  | 322.48 | 35.24 | 1 | 7  | 7  | 8  | 227  | 5.80  |
| KQC42231.1 | Thiol-specific peroxiredoxin [ <i>Saccharomyces boulardii</i> ]                                    | 19.1  | 322.15 | 22.16 | 1 | 3  | 3  | 6  | 176  | 5.16  |
| KQC41362.1 | Peroxisomal NADP-dependent isocitrate dehydrogenase [ <i>Saccharomyces boulardii</i> ]             | 47.8  | 322.14 | 13.57 | 1 | 3  | 5  | 7  | 420  | 9.22  |
| KQC45228.1 | Threonine synthase [ <i>Saccharomyces boulardii</i> ]                                              | 57.4  | 321.72 | 20.62 | 2 | 7  | 7  | 7  | 514  | 5.64  |
| KQC41654.1 | 3-hydroxy-3-methylglutaryl-CoA (HMG-CoA) synthase [ <i>Saccharomyces boulardii</i> ]               | 55.0  | 320.85 | 20.37 | 1 | 8  | 8  | 11 | 491  | 8.16  |
| KQC42980.1 | Subunit of the cytosolic chaperonin Cct ring complex [ <i>Saccharomyces boulardii</i> ]            | 61.6  | 320.42 | 19.72 | 1 | 10 | 10 | 11 | 568  | 5.64  |
| KQC45613.1 | Vacuolar membrane cation-chloride cotransporter (CCC) [ <i>Saccharomyces boulardii</i> ]           | 57.2  | 320.23 | 13.47 | 1 | 6  | 6  | 12 | 527  | 8.88  |
| KQC43733.1 | Translation initiation factor eIF4G [ <i>Saccharomyces boulardii</i> ]                             | 107.0 | 320.02 | 8.51  | 1 | 6  | 6  | 9  | 952  | 5.99  |
| KQC42934.1 | Cytochrome c, isoform 1 [ <i>Saccharomyces boulardii</i> ]                                         | 12.2  | 319.41 | 40.37 | 2 | 5  | 5  | 10 | 109  | 9.42  |
| KQC44822.1 | Cytoplasmic peptidyl-prolyl cis-trans isomerase (cyclophilin) [ <i>Saccharomyces boulardii</i> ]   | 17.4  | 317.95 | 22.22 | 1 | 2  | 2  | 7  | 162  | 7.44  |
| KQC43713.1 | TFIIIF (Transcription Factor II) largest subunit [ <i>Saccharomyces boulardii</i> ]                | 82.2  | 315.27 | 8.03  | 1 | 6  | 6  | 9  | 735  | 5.72  |
| KQC42042.1 | Vacuolar carboxypeptidase Y (proteinase C, CPY) [ <i>Saccharomyces boulardii</i> ]                 | 59.8  | 314.67 | 17.86 | 1 | 9  | 9  | 9  | 532  | 4.74  |
| KQC42746.1 | type I myosin [ <i>Saccharomyces boulardii</i> ]                                                   | 142.2 | 314.33 | 11.57 | 1 | 7  | 10 | 10 | 1270 | 9.36  |
| KQC40701.1 | Ribosomal 60S subunit protein L11A [ <i>Saccharomyces boulardii</i> ]                              | 19.7  | 313.58 | 21.26 | 2 | 4  | 4  | 8  | 174  | 9.92  |
| KQC41731.1 | Carnitine acetyl-CoA transferase [ <i>Saccharomyces boulardii</i> ]                                | 77.2  | 311.90 | 14.03 | 1 | 8  | 9  | 9  | 670  | 8.44  |
| KQC42184.1 | Beta subunit of cytoplasmic phenylalanyl-tRNA synthetase [ <i>Saccharomyces boulardii</i> ]        | 67.3  | 311.67 | 17.14 | 1 | 10 | 10 | 12 | 595  | 5.71  |
| KQC44964.1 | Neutral trehalase, degrades trehalose [ <i>Saccharomyces boulardii</i> ]                           | 85.9  | 311.01 | 13.98 | 3 | 9  | 10 | 10 | 751  | 7.77  |
| KQC43847.1 | Ribosomal 60S subunit protein L26A [ <i>Saccharomyces boulardii</i> ]                              | 14.2  | 309.44 | 42.52 | 1 | 6  | 7  | 10 | 127  | 10.46 |
| KQC43407.1 | NMD3p involved in nuclear export of the large ribosomal subunit [ <i>Saccharomyces boulardii</i> ] | 59.1  | 308.49 | 13.71 | 1 | 6  | 6  | 6  | 518  | 5.47  |
| KQC40820.1 | proteasome core particle subunit alpha 7 [ <i>Saccharomyces boulardii</i> ]                        | 31.5  | 307.63 | 22.92 | 1 | 6  | 6  | 12 | 288  | 5.19  |
| KQC40709.1 | RNA polymerase subunit AC40 [ <i>Saccharomyces boulardii</i> ]                                     | 37.7  | 306.82 | 28.36 | 1 | 7  | 7  | 8  | 335  | 5.52  |
| KQC44789.1 | Subunit of the cytosolic chaperonin Cct ring complex [ <i>Saccharomyces boulardii</i> ]            | 59.9  | 306.07 | 17.40 | 1 | 9  | 9  | 10 | 546  | 5.86  |
| KQC42459.1 | Subunit of Elongator complex [ <i>Saccharomyces boulardii</i> ]                                    | 150.9 | 305.64 | 8.71  | 1 | 8  | 8  | 8  | 1332 | 5.07  |
| KQC41836.1 | Phosphatidylinositol/phosphatidylcholine transfer protein [ <i>Saccharomyces boulardii</i> ]       | 34.7  | 304.84 | 19.54 | 2 | 5  | 5  | 11 | 302  | 5.49  |
| KQC44075.1 | SHE10p involved in outer spore wall assembly [ <i>Saccharomyces boulardii</i> ]                    | 67.3  | 304.70 | 17.01 | 1 | 9  | 9  | 11 | 582  | 5.86  |
| KQC41727.1 | Endoplasmic reticulum (ER) localized integral membrane protein [ <i>Saccharomyces boulardii</i> ]  | 45.8  | 304.40 | 23.57 | 1 | 8  | 8  | 9  | 403  | 7.12  |
| KQC45398.1 | ATP-dependent Lon protease [ <i>Saccharomyces boulardii</i> ]                                      | 127.1 | 303.82 | 6.62  | 2 | 6  | 6  | 7  | 1133 | 5.57  |



|            |                                                                                                           |       |        |       |   |   |   |    |     |       |
|------------|-----------------------------------------------------------------------------------------------------------|-------|--------|-------|---|---|---|----|-----|-------|
| KQC43768.1 | Asparagine synthetase [ <i>Saccharomyces boulardii</i> ]                                                  | 64.6  | 303.06 | 10.14 | 1 | 4 | 5 | 6  | 572 | 5.87  |
| KQC45681.1 | Vacuolar aminopeptidase Y [ <i>Saccharomyces boulardii</i> ]                                              | 60.1  | 302.53 | 17.13 | 1 | 7 | 7 | 10 | 537 | 5.31  |
| KQC43707.1 | E3-binding protein of the mitochondrial pyruvate dehydrogenase complex [ <i>Saccharomyces boulardii</i> ] | 45.3  | 301.85 | 9.02  | 1 | 2 | 2 | 5  | 410 | 5.73  |
| KQC44067.1 | hypothetical protein AB282_02323 [ <i>Saccharomyces boulardii</i> ]                                       | 31.9  | 301.84 | 21.88 | 1 | 5 | 5 | 8  | 288 | 7.46  |
| KQC44751.1 | Reticulon protein [ <i>Saccharomyces boulardii</i> ]                                                      | 32.9  | 300.51 | 24.07 | 1 | 6 | 6 | 8  | 295 | 9.17  |
| KQC40431.1 | Signal recognition particle (SRP) receptor beta subunit [ <i>Saccharomyces boulardii</i> ]                | 73.5  | 299.93 | 11.56 | 1 | 7 | 7 | 7  | 640 | 9.41  |
| KQC43831.1 | hypothetical protein AB282_02087 [ <i>Saccharomyces boulardii</i> ]                                       | 71.3  | 299.55 | 13.40 | 1 | 6 | 6 | 9  | 642 | 8.91  |
| KQC42889.1 | Mitochondrial succinate-fumarate transporter [ <i>Saccharomyces boulardii</i> ]                           | 35.3  | 297.65 | 20.19 | 1 | 6 | 6 | 7  | 322 | 9.76  |
| KQC41083.1 | Cytochrome c1 [ <i>Saccharomyces boulardii</i> ]                                                          | 34.0  | 296.32 | 27.83 | 1 | 5 | 5 | 6  | 309 | 8.12  |
| KQC43903.1 | Tryptophan synthase [ <i>Saccharomyces boulardii</i> ]                                                    | 76.6  | 292.26 | 13.30 | 1 | 7 | 7 | 8  | 707 | 6.51  |
| KQC42036.1 | ATP-dependent RNA helicase [ <i>Saccharomyces boulardii</i> ]                                             | 56.7  | 292.05 | 16.63 | 1 | 7 | 7 | 7  | 505 | 9.33  |
| KQC40650.1 | Cytoplasmic and mitochondrial histidine tRNA synthetase [ <i>Saccharomyces boulardii</i> ]                | 59.9  | 291.41 | 12.45 | 1 | 5 | 5 | 6  | 546 | 7.71  |
| KQC43131.1 | Type I membrane protein involved in autophagy and the Cvt pathway [ <i>Saccharomyces boulardii</i> ]      | 30.2  | 290.43 | 20.66 | 1 | 5 | 5 | 8  | 271 | 5.77  |
| KQC41028.1 | Phosphoribosylaminoimidazole carboxylase [ <i>Saccharomyces boulardii</i> ]                               | 62.2  | 289.97 | 12.96 | 1 | 7 | 7 | 7  | 571 | 7.17  |
| KQC41601.1 | Gamma subunit of coatomer [ <i>Saccharomyces boulardii</i> ]                                              | 104.8 | 289.24 | 11.98 | 1 | 9 | 9 | 9  | 935 | 5.12  |
| KQC43662.1 | Beta subunit of succinyl-CoA ligase [ <i>Saccharomyces boulardii</i> ]                                    | 46.9  | 288.77 | 21.08 | 1 | 6 | 6 | 6  | 427 | 7.47  |
| KQC41493.1 | Cell wall-related secretory glycoprotein [ <i>Saccharomyces boulardii</i> ]                               | 37.3  | 288.60 | 18.08 | 1 | 4 | 4 | 8  | 354 | 5.44  |
| KQC45270.1 | Component of the septin ring, required for cytokinesis [ <i>Saccharomyces boulardii</i> ]                 | 37.0  | 287.82 | 16.46 | 2 | 4 | 6 | 8  | 322 | 5.72  |
| KQC41016.1 | Non-essential component of U5 snRNP [ <i>Saccharomyces boulardii</i> ]                                    | 35.0  | 287.16 | 19.15 | 1 | 5 | 5 | 6  | 329 | 8.66  |
| KQC42789.1 | 5-phospho-ribosyl-1(alpha)-pyrophosphate synthetase [ <i>Saccharomyces boulardii</i> ]                    | 47.0  | 286.22 | 12.65 | 1 | 5 | 5 | 7  | 427 | 5.73  |
| KQC45674.1 | Component of the Paf1p complex involved in transcription elongation [ <i>Saccharomyces boulardii</i> ]    | 51.8  | 286.01 | 23.60 | 1 | 6 | 6 | 7  | 445 | 4.93  |
| KQC41965.1 | putative 1,3-beta-glucanosyltransferase [ <i>Saccharomyces boulardii</i> ]                                | 56.8  | 285.83 | 20.61 | 1 | 8 | 8 | 8  | 524 | 4.86  |
| KQC40815.1 | RPS12p component of the small (40S) ribosomal subunit [ <i>Saccharomyces boulardii</i> ]                  | 15.5  | 285.47 | 46.15 | 1 | 6 | 6 | 13 | 143 | 4.73  |
| KQC43520.1 | Essential protein [ <i>Saccharomyces boulardii</i> ]                                                      | 42.4  | 284.96 | 15.16 | 2 | 4 | 4 | 8  | 376 | 8.48  |
| KQC43981.1 | RNA helicase in the DEAH-box family [ <i>Saccharomyces boulardii</i> ]                                    | 87.5  | 284.91 | 11.34 | 1 | 8 | 8 | 9  | 767 | 6.42  |
| KQC42679.1 | RNAPII degradation factor [ <i>Saccharomyces boulardii</i> ]                                              | 82.2  | 284.42 | 10.51 | 1 | 4 | 4 | 5  | 723 | 4.94  |
| KOH51351.1 | CCT4p Subunit of the cytosolic chaperonin Cct ring complex [ <i>Saccharomyces boulardii</i> ]             | 57.6  | 283.16 | 5.49  | 2 | 2 | 2 | 6  | 528 | 7.93  |
| KQC41920.1 | Cytoplasmic aldehyde dehydrogenase [ <i>Saccharomyces boulardii</i> ]                                     | 55.2  | 282.24 | 16.80 | 1 | 2 | 7 | 7  | 506 | 5.60  |
| KQC41415.1 | Ribosomal 60S subunit protein L16B [ <i>Saccharomyces boulardii</i> ]                                     | 22.2  | 280.61 | 33.33 | 1 | 4 | 7 | 8  | 198 | 10.55 |
| KQC43606.1 | hypothetical protein AB282_02602 [ <i>Saccharomyces boulardii</i> ]                                       | 33.0  | 279.46 | 21.09 | 1 | 4 | 4 | 7  | 294 | 5.66  |
| KQC45115.1 | Glyceraldehyde-3-phosphate dehydrogenase (GAPDH), isozyme 3 [ <i>Saccharomyces boulardii</i> ]            | 41.1  | 279.33 | 13.73 | 1 | 4 | 4 | 6  | 386 | 6.61  |

|            |                                                                                                           |       |        |       |   |   |   |    |      |       |
|------------|-----------------------------------------------------------------------------------------------------------|-------|--------|-------|---|---|---|----|------|-------|
| KQC41566.1 | RNA polymerase I subunit A49 [ <i>Saccharomyces boulardii</i> ]                                           | 46.6  | 279.32 | 11.08 | 1 | 4 | 4 | 7  | 415  | 9.54  |
| KQC41487.1 | Palmitoylated plasma membrane-bound casein kinase I (CK1) isoform [ <i>Saccharomyces boulardii</i> ]      | 62.1  | 278.64 | 8.79  | 1 | 2 | 4 | 5  | 546  | 9.07  |
| AGZ13693.1 | Rep2 protein [ <i>Saccharomyces boulardii</i> ]                                                           | 29.8  | 278.11 | 20.60 | 2 | 5 | 5 | 7  | 267  | 9.32  |
| KQC41270.1 | Component of the Paf1p complex involved in transcription elongation [ <i>Saccharomyces boulardii</i> ]    | 124.7 | 277.23 | 6.59  | 1 | 7 | 7 | 8  | 1077 | 6.32  |
| KQC40758.1 | GTP-binding protein of the rho subfamily of Ras-like protein [ <i>Saccharomyces boulardii</i> ]           | 23.1  | 275.48 | 32.06 | 1 | 4 | 4 | 4  | 209  | 6.23  |
| KQC43329.1 | Ribosomal 60S subunit protein L16A [ <i>Saccharomyces boulardii</i> ]                                     | 22.3  | 275.41 | 38.69 | 1 | 5 | 8 | 9  | 199  | 10.55 |
| KQC43236.1 | hypothetical protein AB282_01312 [ <i>Saccharomyces boulardii</i> ]                                       | 48.8  | 275.02 | 13.23 | 8 | 5 | 6 | 9  | 431  | 9.44  |
| KQC40711.1 | Essential conserved small ribosomal subunit (40s) synthesis factor [ <i>Saccharomyces boulardii</i> ]     | 101.0 | 274.79 | 8.68  | 1 | 5 | 6 | 7  | 887  | 6.47  |
| KQC44383.1 | Acetylglutamate kinase and N-acetyl-gamma-glutamyl-phosphate reductase [ <i>Saccharomyces boulardii</i> ] | 94.8  | 274.28 | 6.95  | 1 | 5 | 5 | 13 | 863  | 8.15  |
| KQC40552.1 | Subunit b of the stator stalk of mitochondrial F1F0 ATP synthase [ <i>Saccharomyces boulardii</i> ]       | 26.5  | 274.03 | 26.25 | 1 | 7 | 7 | 7  | 240  | 9.13  |
| KQC44830.1 | Subunit (61/68 kDa) of TFIID and SAGA complex [ <i>Saccharomyces boulardii</i> ]                          | 60.1  | 271.54 | 14.47 | 1 | 6 | 6 | 6  | 532  | 9.55  |
| KQC41021.1 | Subunit of mitochondrial NAD(+)-dependent isocitrate dehydrogenase [ <i>Saccharomyces boulardii</i> ]     | 39.7  | 270.18 | 28.18 | 1 | 6 | 6 | 9  | 369  | 8.48  |
| KQC40596.1 | Acetyl-CoA C-acetyltransferase (acetoacetyl-CoA thiolase) [ <i>Saccharomyces boulardii</i> ]              | 41.7  | 268.82 | 24.12 | 1 | 8 | 8 | 8  | 398  | 7.39  |
| KQC43445.1 | putative metalloprotease with similarity to zinc carboxypeptidase [ <i>Saccharomyces boulardii</i> ]      | 49.8  | 268.81 | 10.00 | 1 | 3 | 3 | 7  | 430  | 5.24  |
| KQC43603.1 | v-SNARE protein involved in Golgi transport [ <i>Saccharomyces boulardii</i> ]                            | 25.4  | 268.37 | 31.84 | 1 | 5 | 5 | 6  | 223  | 9.44  |
| KQC44653.1 | Low affinity glucose transporter of the major facilitator superfamily [ <i>Saccharomyces boulardii</i> ]  | 62.5  | 266.81 | 16.23 | 5 | 3 | 6 | 7  | 567  | 7.08  |
| KQC42763.1 | Mitochondrial NADH-cytochrome b5 reductase [ <i>Saccharomyces boulardii</i> ]                             | 36.7  | 264.28 | 21.67 | 1 | 5 | 5 | 7  | 323  | 8.78  |
| KQC42373.1 | Endochitinase [ <i>Saccharomyces boulardii</i> ]                                                          | 58.0  | 262.20 | 5.98  | 1 | 3 | 3 | 6  | 552  | 4.51  |
| KQC43123.1 | Farnesyl pyrophosphate synthetase [ <i>Saccharomyces boulardii</i> ]                                      | 40.5  | 261.76 | 13.07 | 1 | 4 | 4 | 6  | 352  | 5.47  |
| KOH49895.1 | RPL43Ap Ribosomal 60S subunit protein L43A [ <i>Saccharomyces boulardii</i> ]                             | 10.9  | 261.76 | 27.55 | 3 | 2 | 2 | 7  | 98   | 10.40 |
| KQC40975.1 | Mitochondrial translation elongation factor Tu [ <i>Saccharomyces boulardii</i> ]                         | 48.0  | 260.83 | 15.79 | 1 | 5 | 5 | 5  | 437  | 6.65  |
| KQC40933.1 | Ribosomal Protein of the Large subunit [ <i>Saccharomyces boulardii</i> ]                                 | 12.2  | 260.74 | 37.38 | 1 | 1 | 4 | 7  | 107  | 11.08 |
| KOH48839.1 | FPR3p Nucleolar peptidyl-prolyl cis-trans isomerase (PPIase) [ <i>Saccharomyces boulardii</i> ]           | 46.1  | 260.54 | 18.38 | 2 | 4 | 5 | 7  | 408  | 4.49  |
| KOH49719.1 | UTP10p Nucleolar protein [ <i>Saccharomyces boulardii</i> ]                                               | 199.8 | 260.19 | 4.01  | 3 | 6 | 6 | 6  | 1769 | 6.38  |
| KQC44696.1 | Subunit 5 of the stator stalk of mitochondrial F1F0 ATP synthase [ <i>Saccharomyces boulardii</i> ]       | 22.8  | 259.83 | 30.19 | 1 | 5 | 5 | 10 | 212  | 9.57  |
| KQC45023.1 | hypothetical protein AB282_01101 [ <i>Saccharomyces boulardii</i> ]                                       | 22.9  | 258.35 | 17.24 | 1 | 3 | 3 | 4  | 203  | 7.14  |
| KQC41318.1 | Subunit of the ARP2/3 complex [ <i>Saccharomyces boulardii</i> ]                                          | 39.5  | 257.77 | 21.35 | 1 | 5 | 5 | 5  | 342  | 6.81  |
| KQC43786.1 | Component of several different pre-ribosomal particle [ <i>Saccharomyces boulardii</i> ]                  | 69.8  | 256.23 | 11.57 | 1 | 6 | 6 | 6  | 605  | 5.60  |

|            |                                                                                                                 |       |        |       |   |   |   |    |      |       |
|------------|-----------------------------------------------------------------------------------------------------------------|-------|--------|-------|---|---|---|----|------|-------|
| KQC43974.1 | Subunit (60 kDa) of TFIID and SAGA complex [ <i>Saccharomyces boulardii</i> ]                                   | 57.8  | 254.71 | 17.83 | 1 | 6 | 6 | 7  | 516  | 5.50  |
| KQC42329.1 | Small rho-like GTPase [ <i>Saccharomyces boulardii</i> ]                                                        | 21.3  | 254.49 | 14.66 | 1 | 2 | 2 | 5  | 191  | 6.74  |
| KQC44937.1 | MRH1p that localizes primarily to the plasma membrane [ <i>Saccharomyces boulardii</i> ]                        | 36.2  | 254.13 | 12.81 | 1 | 1 | 3 | 8  | 320  | 9.19  |
| KQC40624.1 | putative 2-methylcitrate dehydratase [ <i>Saccharomyces boulardii</i> ]                                         | 57.6  | 252.43 | 13.76 | 1 | 6 | 6 | 8  | 516  | 9.07  |
| KQC44787.1 | ATP-dependent DNA helicase, also known as pontin [ <i>Saccharomyces boulardii</i> ]                             | 50.4  | 251.35 | 15.98 | 1 | 6 | 6 | 7  | 463  | 5.87  |
| KQC40423.1 | GTPase, GTP-binding protein of the ARF family [ <i>Saccharomyces boulardii</i> ]                                | 21.4  | 250.32 | 28.95 | 1 | 4 | 4 | 8  | 190  | 5.38  |
| KQC45245.1 | Negative regulator of WASP-Arp23 complex [ <i>Saccharomyces boulardii</i> ]                                     | 96.1  | 250.03 | 7.82  | 1 | 6 | 6 | 6  | 870  | 8.59  |
| KQC42411.1 | Component of the exomer complex [ <i>Saccharomyces boulardii</i> ]                                              | 60.5  | 249.85 | 12.34 | 2 | 5 | 5 | 6  | 551  | 4.51  |
| KQC42415.1 | RPS25Bp component of the small (40S) ribosomal subunit [ <i>Saccharomyces boulardii</i> ]                       | 12.0  | 249.78 | 28.70 | 2 | 4 | 4 | 8  | 108  | 10.32 |
| KQC42743.1 | Serine/threonine protein kinase [ <i>Saccharomyces boulardii</i> ]                                              | 76.4  | 249.24 | 5.74  | 1 | 4 | 4 | 6  | 680  | 6.51  |
| KQC40957.1 | Second-largest subunit of RNA polymerase III [ <i>Saccharomyces boulardii</i> ]                                 | 129.4 | 249.14 | 8.18  | 1 | 7 | 7 | 7  | 1149 | 8.18  |
| KQC43388.1 | Farnesyl-diphosphate farnesyl transferase (squalene synthase) [ <i>Saccharomyces boulardii</i> ]                | 51.7  | 249.03 | 20.72 | 6 | 8 | 9 | 13 | 444  | 5.90  |
| KQC45759.1 | Member of the p24 family involved in ER to Golgi transport [ <i>Saccharomyces boulardii</i> ]                   | 24.7  | 248.41 | 17.81 | 1 | 3 | 3 | 4  | 219  | 7.43  |
| KQC45500.1 | Cortical ER protein involved in ER-plasma membrane tethering [ <i>Saccharomyces boulardii</i> ]                 | 105.6 | 247.95 | 7.51  | 1 | 6 | 6 | 7  | 945  | 8.95  |
| KQC41455.1 | hypothetical protein AB282_04316 [ <i>Saccharomyces boulardii</i> ]                                             | 74.1  | 247.15 | 10.71 | 1 | 6 | 6 | 6  | 644  | 6.71  |
| KQC40491.1 | Ribosomal 60S subunit protein L33A [ <i>Saccharomyces boulardii</i> ]                                           | 13.2  | 246.73 | 34.48 | 1 | 1 | 4 | 7  | 116  | 11.44 |
| KQC41565.1 | hypothetical protein AB282_04426 [ <i>Saccharomyces boulardii</i> ]                                             | 86.0  | 246.18 | 9.55  | 1 | 7 | 7 | 9  | 754  | 6.65  |
| KQC41039.1 | RNA polymerase III largest subunit C160 [ <i>Saccharomyces boulardii</i> ]                                      | 162.2 | 246.00 | 5.82  | 1 | 9 | 9 | 10 | 1460 | 8.38  |
| KQC44109.1 | Delta subunit of the coatomer complex (COPI) [ <i>Saccharomyces boulardii</i> ]                                 | 60.6  | 244.12 | 10.99 | 3 | 6 | 7 | 9  | 546  | 5.20  |
| KQC40774.1 | Dolichol phosphate mannose (Dol-P-Man) synthase of the ER membrane [ <i>Saccharomyces boulardii</i> ]           | 30.3  | 243.83 | 22.85 | 1 | 4 | 4 | 8  | 267  | 7.88  |
| KQC40383.1 | hypothetical protein AB282_05017 [ <i>Saccharomyces boulardii</i> ]                                             | 62.7  | 243.02 | 9.26  | 1 | 4 | 4 | 5  | 551  | 5.12  |
| KQC43173.1 | ER associated glutathione S-transferase capable of homodimerization [ <i>Saccharomyces boulardii</i> ]          | 26.8  | 241.14 | 27.78 | 1 | 6 | 6 | 7  | 234  | 6.65  |
| KQC44619.1 | Nuclear polyadenylated RNA-binding protein [ <i>Saccharomyces boulardii</i> ]                                   | 24.9  | 240.85 | 26.55 | 1 | 5 | 5 | 6  | 226  | 11.33 |
| KQC42185.1 | RPS22Ap component of the small (40S) ribosomal subunit [ <i>Saccharomyces boulardii</i> ]                       | 13.7  | 240.28 | 18.18 | 1 | 1 | 1 | 3  | 121  | 6.14  |
| KQC41392.1 | YIP3p [ <i>Saccharomyces boulardii</i> ]                                                                        | 19.4  | 239.51 | 30.68 | 1 | 5 | 5 | 7  | 176  | 8.41  |
| KOH49811.1 | OST1p Alpha subunit of the oligosaccharyltransferase complex of the ER lumen [ <i>Saccharomyces boulardii</i> ] | 54.1  | 237.95 | 7.77  | 2 | 2 | 2 | 3  | 476  | 5.12  |
| KOH50965.1 | GSY1p Glycogen synthase [ <i>Saccharomyces boulardii</i> ]                                                      | 80.4  | 237.60 | 11.30 | 2 | 4 | 6 | 7  | 708  | 6.02  |
| KQC40756.1 | Translation initiation factor eIF-4B [ <i>Saccharomyces boulardii</i> ]                                         | 48.5  | 237.50 | 28.21 | 1 | 8 | 8 | 9  | 436  | 5.29  |
| KQC45797.1 | Beta-isopropylmalate dehydrogenase (IMDH) [ <i>Saccharomyces boulardii</i> ]                                    | 38.9  | 237.47 | 17.58 | 2 | 4 | 4 | 5  | 364  | 5.76  |

|            |                                                                                                              |       |        |       |   |   |   |    |      |       |
|------------|--------------------------------------------------------------------------------------------------------------|-------|--------|-------|---|---|---|----|------|-------|
| KQC41252.1 | Cytoplasmic malate dehydrogenase [ <i>Saccharomyces boulardii</i> ]                                          | 40.7  | 237.17 | 15.12 | 2 | 6 | 6 | 7  | 377  | 7.09  |
| KQC44162.1 | Subunit of U3-containing Small Subunit (SSU) processome complex [ <i>Saccharomyces boulardii</i> ]           | 23.5  | 236.66 | 25.58 | 1 | 3 | 4 | 6  | 215  | 7.09  |
| KQC41653.1 | Component of the RSC chromatin remodeling complex [ <i>Saccharomyces boulardii</i> ]                         | 65.2  | 236.39 | 9.12  | 1 | 4 | 4 | 6  | 581  | 7.83  |
| KQC44129.1 | Subunit alpha of assimilatory sulfite reductase [ <i>Saccharomyces boulardii</i> ]                           | 114.8 | 235.64 | 8.89  | 1 | 7 | 7 | 8  | 1035 | 5.27  |
| KQC41304.1 | Saccharopine dehydrogenase (NADP+, L-glutamate-forming) [ <i>Saccharomyces boulardii</i> ]                   | 48.9  | 235.62 | 15.47 | 1 | 5 | 5 | 5  | 446  | 5.27  |
| KQC42406.1 | Ribosomal 60S subunit protein L38 [ <i>Saccharomyces boulardii</i> ]                                         | 8.8   | 235.39 | 51.28 | 1 | 4 | 4 | 7  | 78   | 10.93 |
| KQC41767.1 | Rab family GTPase [ <i>Saccharomyces boulardii</i> ]                                                         | 23.0  | 235.21 | 29.81 | 1 | 4 | 4 | 7  | 208  | 4.93  |
| KQC43138.1 | Alpha-1,2-mannosyltransferase [ <i>Saccharomyces boulardii</i> ]                                             | 67.7  | 234.07 | 17.09 | 1 | 7 | 7 | 7  | 591  | 6.87  |
| KQC43757.1 | Alpha 3 subunit of the 20S proteasome [ <i>Saccharomyces boulardii</i> ]                                     | 28.7  | 233.55 | 20.16 | 1 | 5 | 5 | 7  | 258  | 5.22  |
| KQC45606.1 | putative alpha-1,2-mannosyltransferase [ <i>Saccharomyces boulardii</i> ]                                    | 46.4  | 233.40 | 20.51 | 1 | 7 | 7 | 10 | 395  | 8.41  |
| KQC42917.1 | Essential component of the Arp2/3 complex [ <i>Saccharomyces boulardii</i> ]                                 | 49.5  | 232.41 | 22.27 | 1 | 8 | 8 | 8  | 449  | 5.80  |
| KQC44342.1 | Rab family GTPase [ <i>Saccharomyces boulardii</i> ]                                                         | 24.5  | 231.49 | 30.04 | 1 | 1 | 5 | 6  | 223  | 5.08  |
| KQC44122.1 | hypothetical protein AB282_01786 [ <i>Saccharomyces boulardii</i> ]                                          | 63.1  | 231.20 | 10.41 | 1 | 4 | 4 | 4  | 557  | 5.33  |
| KQC41407.1 | rRNA m5C methyltransferase [ <i>Saccharomyces boulardii</i> ]                                                | 69.7  | 230.61 | 9.87  | 1 | 5 | 5 | 5  | 618  | 5.07  |
| KQC40614.1 | TFIID subunit, involved in RNA pol II transcription initiation [ <i>Saccharomyces boulardii</i> ]            | 108.7 | 229.98 | 4.86  | 2 | 4 | 4 | 4  | 947  | 5.92  |
| KQC41303.1 | Ubiquitin protease cofactor [ <i>Saccharomyces boulardii</i> ]                                               | 57.6  | 227.97 | 15.92 | 1 | 5 | 5 | 6  | 515  | 9.11  |
| KQC44704.1 | hypothetical protein AB282_00750 [ <i>Saccharomyces boulardii</i> ]                                          | 46.3  | 227.70 | 17.16 | 1 | 5 | 5 | 5  | 408  | 4.96  |
| KQC42787.1 | Golgi membrane protein with similarity to mammalian CASP [ <i>Saccharomyces boulardii</i> ]                  | 77.3  | 227.27 | 9.57  | 1 | 4 | 5 | 6  | 679  | 6.05  |
| KQC42317.1 | Peptidyl-prolyl cis-trans isomerase (cyclophilin) [ <i>Saccharomyces boulardii</i> ]                         | 42.0  | 225.86 | 16.71 | 1 | 6 | 6 | 7  | 371  | 6.16  |
| KQC40646.1 | Gamma-adaptin [ <i>Saccharomyces boulardii</i> ]                                                             | 93.6  | 225.68 | 8.53  | 1 | 7 | 7 | 7  | 832  | 5.50  |
| KQC45580.1 | Acyl-coenzymeA:ethanol O-acyltransferase [ <i>Saccharomyces boulardii</i> ]                                  | 51.2  | 224.89 | 19.96 | 1 | 8 | 8 | 9  | 451  | 7.53  |
| KQC41619.1 | Dual-specificity kinase [ <i>Saccharomyces boulardii</i> ]                                                   | 43.1  | 221.86 | 17.87 | 1 | 7 | 7 | 9  | 375  | 8.65  |
| KOH47959.1 | SIN3p Component of both the Rpd3S and Rpd3L histone deacetylase complexes [ <i>Saccharomyces boulardii</i> ] | 174.8 | 220.15 | 5.14  | 2 | 7 | 7 | 8  | 1536 | 5.64  |
| KQC40611.1 | RRP12p [ <i>Saccharomyces boulardii</i> ]                                                                    | 137.3 | 218.45 | 5.94  | 1 | 5 | 6 | 6  | 1228 | 7.03  |
| KQC42228.1 | Huge dynein-related AAA-type ATPase (midasin) [ <i>Saccharomyces boulardii</i> ]                             | 558.9 | 217.08 | 1.57  | 3 | 6 | 7 | 7  | 4910 | 5.02  |
| KQC40729.1 | hypothetical protein AB282_05364 [ <i>Saccharomyces boulardii</i> ]                                          | 49.3  | 215.58 | 16.78 | 1 | 6 | 6 | 7  | 435  | 4.75  |
| KQC41742.1 | Thioredoxin peroxidase [ <i>Saccharomyces boulardii</i> ]                                                    | 21.6  | 215.24 | 29.59 | 2 | 5 | 5 | 6  | 196  | 5.14  |
| KQC44040.1 | Subunit IV of cytochrome c oxidase [ <i>Saccharomyces boulardii</i> ]                                        | 17.1  | 214.96 | 41.94 | 1 | 4 | 4 | 6  | 155  | 6.90  |
| KQC42646.1 | Subunit d of the stator stalk of mitochondrial F1F0 ATP synthase [ <i>Saccharomyces boulardii</i> ]          | 19.8  | 214.55 | 36.78 | 1 | 4 | 4 | 6  | 174  | 8.94  |
| KQC44405.1 | Anthranilate synthase [ <i>Saccharomyces boulardii</i> ]                                                     | 56.7  | 214.07 | 13.81 | 1 | 6 | 6 | 7  | 507  | 5.86  |
| KQC44264.1 | DNA polymerase phi [ <i>Saccharomyces boulardii</i> ]                                                        | 115.7 | 213.65 | 6.36  | 1 | 5 | 5 | 5  | 1022 | 5.30  |

|            |                                                                                                         |       |        |       |   |   |   |   |      |       |
|------------|---------------------------------------------------------------------------------------------------------|-------|--------|-------|---|---|---|---|------|-------|
| KQC40643.1 | Acid trehalase required for utilization of extracellular trehalose [ <i>Saccharomyces boulardii</i> ]   | 136.9 | 212.32 | 3.88  | 1 | 5 | 5 | 6 | 1211 | 5.40  |
| KQC45798.1 | Cysteine desulfurase [ <i>Saccharomyces boulardii</i> ]                                                 | 54.4  | 212.09 | 10.06 | 1 | 4 | 4 | 6 | 497  | 8.19  |
| KQC42482.1 | High-affinity copper transporter of the plasma membrane [ <i>Saccharomyces boulardii</i> ]              | 27.5  | 211.38 | 23.24 | 1 | 5 | 5 | 7 | 241  | 7.74  |
| KQC45289.1 | Multifunctional enzyme containing phosphoribosyl-ATP pyrophosphatase [ <i>Saccharomyces boulardii</i> ] | 84.4  | 211.34 | 8.17  | 3 | 5 | 5 | 6 | 771  | 5.24  |
| KQC42320.1 | Vacuolar Fe <sup>2+</sup> /Mn <sup>2+</sup> transporter [ <i>Saccharomyces boulardii</i> ]              | 34.2  | 210.93 | 15.84 | 1 | 4 | 4 | 5 | 322  | 5.10  |
| KOH52390.1 | SLA1p Cytoskeletal protein binding protein [ <i>Saccharomyces boulardii</i> ]                           | 135.8 | 210.78 | 4.98  | 2 | 4 | 4 | 4 | 1244 | 6.30  |
| KQC40404.1 | Beta subunit of the translation initiation factor eIF2 [ <i>Saccharomyces boulardii</i> ]               | 31.6  | 210.58 | 30.53 | 1 | 7 | 7 | 7 | 285  | 9.50  |
| KQC44041.1 | RPS26Ap component of the small (40S) ribosomal subunit [ <i>Saccharomyces boulardii</i> ]               | 13.5  | 210.41 | 20.17 | 2 | 2 | 2 | 6 | 119  | 10.76 |
| KQC44925.1 | Triose phosphate isomerase, abundant glycolytic enzyme [ <i>Saccharomyces boulardii</i> ]               | 26.8  | 209.99 | 22.18 | 1 | 4 | 4 | 4 | 248  | 6.01  |
| KQC40728.1 | hypothetical protein AB282_05363 [ <i>Saccharomyces boulardii</i> ]                                     | 19.0  | 209.94 | 38.15 | 1 | 5 | 5 | 6 | 173  | 9.39  |
| KQC42781.1 | Required for 25S rRNA maturation and 60S ribosomal subunit assembly [ <i>Saccharomyces boulardii</i> ]  | 49.6  | 209.57 | 11.03 | 1 | 4 | 4 | 4 | 426  | 6.54  |
| KQC43381.1 | Component of the Rix1 complex [ <i>Saccharomyces boulardii</i> ]                                        | 86.7  | 209.10 | 3.93  | 1 | 2 | 2 | 4 | 763  | 5.62  |
| KQC42367.1 | DEAD-box protein required for 27S rRNA processing [ <i>Saccharomyces boulardii</i> ]                    | 68.0  | 208.63 | 11.28 | 1 | 6 | 6 | 6 | 594  | 9.19  |
| KQC44571.1 | RNA-binding protein [ <i>Saccharomyces boulardii</i> ]                                                  | 45.4  | 208.04 | 15.70 | 1 | 5 | 5 | 5 | 414  | 5.54  |
| KQC44641.1 | Golgi-localized protein [ <i>Saccharomyces boulardii</i> ]                                              | 62.3  | 207.68 | 10.23 | 1 | 4 | 5 | 6 | 557  | 5.71  |
| KQC43074.1 | Subunit of the cytosolic chaperonin Cct ring complex [ <i>Saccharomyces boulardii</i> ]                 | 59.7  | 207.33 | 8.91  | 1 | 4 | 4 | 5 | 550  | 5.48  |
| KQC45701.1 | putative medium-chain alcohol dehydrogenase with similarity to BDH1 [ <i>Saccharomyces boulardii</i> ]  | 41.6  | 206.97 | 21.73 | 3 | 7 | 7 | 8 | 382  | 6.57  |
| KOH49776.1 | MTR4p ATP-dependent 3'-5' RNA helicase of the DEXD/H family [ <i>Saccharomyces boulardii</i> ]          | 118.8 | 206.75 | 5.84  | 2 | 5 | 5 | 5 | 1045 | 6.35  |
| KQC44990.1 | Essential component of the Arp2/3 complex [ <i>Saccharomyces boulardii</i> ]                            | 44.0  | 206.46 | 15.35 | 1 | 5 | 5 | 5 | 391  | 5.78  |
| KQC41171.1 | Alpha 4 subunit of the 20S proteasome [ <i>Saccharomyces boulardii</i> ]                                | 28.4  | 205.96 | 17.72 | 1 | 3 | 3 | 4 | 254  | 7.36  |
| KQC42045.1 | Phosphoribosylpyrophosphate amidotransferase (PRPPAT) [ <i>Saccharomyces boulardii</i> ]                | 56.7  | 205.81 | 19.41 | 1 | 7 | 7 | 9 | 510  | 6.28  |
| KQC44161.1 | Subunit of vacuolar transporter chaperone (VTC) complex [ <i>Saccharomyces boulardii</i> ]              | 91.2  | 203.99 | 8.10  | 2 | 5 | 5 | 6 | 790  | 8.32  |
| KQC44010.1 | Central component of the peroxisomal importomer complex [ <i>Saccharomyces boulardii</i> ]              | 38.4  | 203.98 | 13.78 | 2 | 4 | 4 | 4 | 341  | 4.88  |
| KQC44769.1 | Alpha subunit of chaperonin-containing T-complex [ <i>Saccharomyces boulardii</i> ]                     | 60.4  | 202.99 | 12.70 | 1 | 6 | 6 | 7 | 559  | 6.49  |
| KQC41903.1 | hypothetical protein AB282_03967 [ <i>Saccharomyces boulardii</i> ]                                     | 41.7  | 202.47 | 14.25 | 1 | 3 | 3 | 5 | 365  | 8.10  |
| KQC42111.1 | Component of the polarisome [ <i>Saccharomyces boulardii</i> ]                                          | 165.7 | 201.15 | 1.74  | 1 | 2 | 2 | 4 | 1493 | 5.15  |
| KQC43480.1 | High-affinity glucose transporter [ <i>Saccharomyces boulardii</i> ]                                    | 63.9  | 200.94 | 13.72 | 4 | 2 | 5 | 8 | 576  | 6.67  |
| KQC42587.1 | Histone chaperone [ <i>Saccharomyces boulardii</i> ]                                                    | 47.8  | 200.57 | 11.51 | 1 | 3 | 3 | 3 | 417  | 4.35  |
| KQC40731.1 | Asparagine synthetase [ <i>Saccharomyces boulardii</i> ]                                                | 64.4  | 198.53 | 13.11 | 1 | 6 | 7 | 7 | 572  | 6.11  |

|            |                                                                                                          |       |        |       |   |   |   |   |      |      |
|------------|----------------------------------------------------------------------------------------------------------|-------|--------|-------|---|---|---|---|------|------|
| KQC41033.1 | Component of the Paf1 complex [ <i>Saccharomyces boulardii</i> ]                                         | 53.9  | 198.00 | 15.73 | 1 | 5 | 5 | 6 | 464  | 4.45 |
| KQC43959.1 | Nexin-1 [ <i>Saccharomyces boulardii</i> ]                                                               | 66.9  | 197.47 | 5.55  | 1 | 3 | 3 | 4 | 577  | 6.27 |
| KQC40854.1 | Gamma-glutamyl phosphate reductase [ <i>Saccharomyces boulardii</i> ]                                    | 49.7  | 196.28 | 12.72 | 1 | 5 | 5 | 5 | 456  | 5.59 |
| KQC45533.1 | hypothetical protein AB282_00295 [ <i>Saccharomyces boulardii</i> ]                                      | 56.1  | 195.81 | 12.32 | 1 | 5 | 5 | 5 | 495  | 6.09 |
| KQC41005.1 | Plasma membrane ATP-binding cassette (ABC) transporter [ <i>Saccharomyces boulardii</i> ]                | 170.3 | 195.06 | 3.84  | 2 | 5 | 5 | 5 | 1511 | 7.88 |
| KQC45204.1 | General repressor of transcription [ <i>Saccharomyces boulardii</i> ]                                    | 78.2  | 194.78 | 9.40  | 1 | 6 | 6 | 6 | 713  | 5.60 |
| KQC44433.1 | Integral ER membrane protein, regulates phospholipid metabolism [ <i>Saccharomyces boulardii</i> ]       | 26.9  | 194.16 | 32.79 | 1 | 6 | 6 | 7 | 244  | 4.89 |
| KQC43484.1 | RPF1p involved in assembly and export of the large ribosomal subunit [ <i>Saccharomyces boulardii</i> ]  | 35.1  | 193.62 | 13.22 | 1 | 4 | 4 | 6 | 295  | 9.47 |
| KQC41690.1 | Alpha-tubulin [ <i>Saccharomyces boulardii</i> ]                                                         | 49.8  | 193.11 | 17.90 | 1 | 6 | 6 | 7 | 447  | 5.07 |
| KQC40916.1 | t-SNARE protein required for secretory vesicle-plasma membrane fusion [ <i>Saccharomyces boulardii</i> ] | 75.3  | 193.06 | 8.30  | 1 | 5 | 5 | 5 | 663  | 5.27 |
| KQC44820.1 | Aspartic beta semi-aldehyde dehydrogenase [ <i>Saccharomyces boulardii</i> ]                             | 39.5  | 192.83 | 16.44 | 1 | 5 | 5 | 5 | 365  | 6.73 |
| KQC42764.1 | dehydratase [ <i>Saccharomyces boulardii</i> ]                                                           | 37.3  | 192.62 | 10.39 | 1 | 4 | 4 | 5 | 337  | 7.55 |
| KQC42103.1 | FRA1p involved in negative regulation of iron regulon transcription [ <i>Saccharomyces boulardii</i> ]   | 84.8  | 191.50 | 6.81  | 1 | 4 | 4 | 4 | 749  | 6.87 |
| KQC43963.1 | putative GTPase involved in 60S ribosomal subunit biogenesis [ <i>Saccharomyces boulardii</i> ]          | 72.7  | 191.14 | 11.09 | 1 | 6 | 6 | 7 | 640  | 8.59 |
| KQC44823.1 | ENT5p containing an N-terminal epsin-like domain [ <i>Saccharomyces boulardii</i> ]                      | 47.3  | 190.84 | 16.55 | 1 | 6 | 6 | 7 | 411  | 6.49 |
| KQC44192.1 | Beta-tubulin [ <i>Saccharomyces boulardii</i> ]                                                          | 50.9  | 189.99 | 12.47 | 1 | 5 | 5 | 6 | 457  | 4.78 |
| KQC42613.1 | hypothetical protein AB282_03041 [ <i>Saccharomyces boulardii</i> ]                                      | 78.8  | 189.98 | 9.01  | 2 | 4 | 6 | 6 | 699  | 5.15 |
| KQC45619.1 | E1 beta subunit of the pyruvate dehydrogenase (PDH) complex [ <i>Saccharomyces boulardii</i> ]           | 40.0  | 189.91 | 16.94 | 1 | 5 | 5 | 5 | 366  | 5.30 |
| KQC45516.1 | putative membrane protein [ <i>Saccharomyces boulardii</i> ]                                             | 21.1  | 189.40 | 32.98 | 1 | 5 | 5 | 6 | 188  | 9.19 |
| KQC41469.1 | Component of the TOM (Translocase of Outer Membrane) complex [ <i>Saccharomyces boulardii</i> ]          | 16.8  | 188.56 | 19.74 | 1 | 2 | 2 | 3 | 152  | 4.16 |
| KQC40707.1 | Essential non-ATPase regulatory subunit of the 26S proteasome [ <i>Saccharomyces boulardii</i> ]         | 48.9  | 187.82 | 10.49 | 1 | 4 | 4 | 4 | 429  | 5.25 |
| KQC45774.1 | SWH1p [ <i>Saccharomyces boulardii</i> ]                                                                 | 134.9 | 186.95 | 4.38  | 2 | 4 | 4 | 5 | 1188 | 5.60 |
| KQC42681.1 | TMA19p [ <i>Saccharomyces boulardii</i> ]                                                                | 18.7  | 186.68 | 16.17 | 1 | 2 | 2 | 3 | 167  | 4.56 |
| KOH49812.1 | PRE3p Beta 1 subunit of the 20S proteasome [ <i>Saccharomyces boulardii</i> ]                            | 23.5  | 186.56 | 24.19 | 2 | 5 | 5 | 6 | 215  | 5.90 |
| KQC44502.1 | Mitochondrial protein involved in assembly of succinate dehydrogenase [ <i>Saccharomyces boulardii</i> ] | 23.8  | 185.39 | 19.51 | 1 | 3 | 3 | 4 | 205  | 6.05 |
| KQC41174.1 | Nucleolar protein involved in pre-25S rRNA processing [ <i>Saccharomyces boulardii</i> ]                 | 51.9  | 185.37 | 15.47 | 1 | 5 | 5 | 5 | 459  | 9.47 |
| KQC42665.1 | hypothetical protein AB282_03093 [ <i>Saccharomyces boulardii</i> ]                                      | 60.0  | 185.34 | 3.82  | 1 | 1 | 1 | 3 | 523  | 5.17 |
| KQC45737.1 | PMT2p O-mannosyltransferase of the ER membrane [ <i>Saccharomyces boulardii</i> ]                        | 86.8  | 184.97 | 8.30  | 1 | 5 | 5 | 5 | 759  | 7.71 |
| KQC40652.1 | GLutamiNe metabolism [ <i>Saccharomyces boulardii</i> ]                                                  | 41.7  | 184.32 | 13.51 | 1 | 4 | 4 | 4 | 370  | 6.34 |
| KQC42756.1 | hypothetical protein AB282_03184 [ <i>Saccharomyces boulardii</i> ]                                      | 25.1  | 183.86 | 28.31 | 1 | 4 | 4 | 4 | 219  | 4.79 |

|            |                                                                                                           |       |        |       |   |   |   |   |      |      |
|------------|-----------------------------------------------------------------------------------------------------------|-------|--------|-------|---|---|---|---|------|------|
| KQC44501.1 | Cytoplasmic glutaredoxin [ <i>Saccharomyces boulardii</i> ]                                               | 15.9  | 183.82 | 32.87 | 1 | 4 | 4 | 6 | 143  | 7.28 |
| KQC41828.1 | Integral membrane protein [ <i>Saccharomyces boulardii</i> ]                                              | 18.7  | 182.67 | 14.97 | 1 | 2 | 2 | 3 | 167  | 6.76 |
| KQC45748.1 | Cystathionine gamma-lyase [ <i>Saccharomyces boulardii</i> ]                                              | 42.5  | 182.50 | 12.44 | 1 | 4 | 4 | 4 | 394  | 6.54 |
| KQC45007.1 | RNA binding protein required for maturation of tRNA and U6 snRNA [ <i>Saccharomyces boulardii</i> ]       | 32.1  | 182.43 | 14.55 | 1 | 3 | 3 | 3 | 275  | 8.54 |
| KQC45566.1 | Cyclin-dependent kinase (CDK) catalytic subunit [ <i>Saccharomyces boulardii</i> ]                        | 34.0  | 182.37 | 26.17 | 2 | 8 | 8 | 9 | 298  | 8.35 |
| KOH52280.1 | CYC8p General transcriptional co-repressor [ <i>Saccharomyces boulardii</i> ]                             | 106.8 | 181.63 | 5.71  | 2 | 4 | 4 | 4 | 964  | 5.05 |
| KQC44148.1 | Ubiquitin-specific protease [ <i>Saccharomyces boulardii</i> ]                                            | 57.1  | 181.57 | 11.02 | 1 | 4 | 4 | 4 | 499  | 7.14 |
| KQC41063.1 | Endosomal Rab family GTPase [ <i>Saccharomyces boulardii</i> ]                                            | 23.1  | 181.07 | 21.90 | 2 | 3 | 4 | 5 | 210  | 5.33 |
| KQC43714.1 | Cytoplasmic tyrosyl-tRNA synthetase [ <i>Saccharomyces boulardii</i> ]                                    | 44.0  | 181.06 | 15.48 | 1 | 7 | 7 | 8 | 394  | 8.27 |
| KQC43030.1 | Mitochondrial intermembrane space protein [ <i>Saccharomyces boulardii</i> ]                              | 28.5  | 180.91 | 13.49 | 1 | 2 | 2 | 3 | 252  | 5.92 |
| KQC41705.1 | Subunit of the heterodimeric FACT complex (Spt16p-Pob3p) [ <i>Saccharomyces boulardii</i> ]               | 63.0  | 180.71 | 8.51  | 1 | 4 | 5 | 6 | 552  | 4.86 |
| KQC44364.1 | Aspartate kinase (L-aspartate 4-P-transferase) [ <i>Saccharomyces boulardii</i> ]                         | 57.8  | 180.30 | 7.62  | 1 | 3 | 3 | 4 | 525  | 6.61 |
| KQC45526.1 | Transketolase [ <i>Saccharomyces boulardii</i> ]                                                          | 75.0  | 179.63 | 9.99  | 1 | 5 | 5 | 5 | 681  | 6.14 |
| KQC43441.1 | Palmitoylated plasma membrane-bound casein kinase I (CK1) isoform [ <i>Saccharomyces boulardii</i> ]      | 61.7  | 179.61 | 10.97 | 1 | 3 | 5 | 6 | 538  | 8.98 |
| KQC43642.1 | hypothetical protein AB282_01898 [ <i>Saccharomyces boulardii</i> ]                                       | 81.1  | 179.46 | 10.27 | 1 | 7 | 7 | 8 | 701  | 6.87 |
| KQC41991.1 | Citrate and oxoglutarate carrier protein [ <i>Saccharomyces boulardii</i> ]                               | 34.2  | 179.27 | 14.97 | 1 | 4 | 4 | 4 | 314  | 9.88 |
| KQC44916.1 | Constituent of 66S pre-ribosomal particle [ <i>Saccharomyces boulardii</i> ]                              | 116.6 | 179.14 | 5.27  | 1 | 4 | 4 | 4 | 1025 | 5.02 |
| KQC41993.1 | Vacuolar membrane zinc transporter [ <i>Saccharomyces boulardii</i> ]                                     | 48.3  | 178.35 | 11.09 | 1 | 3 | 3 | 5 | 442  | 6.35 |
| KQC40958.1 | NOC2p involved in ribosome biogenesis [ <i>Saccharomyces boulardii</i> ]                                  | 81.8  | 178.18 | 10.67 | 1 | 8 | 8 | 8 | 712  | 8.38 |
| KQC41080.1 | VPS45p of the Sec1p/Munc-18 family [ <i>Saccharomyces boulardii</i> ]                                     | 76.4  | 177.03 | 8.15  | 1 | 4 | 4 | 4 | 675  | 5.19 |
| KQC43462.1 | Cytoplasmic aspartyl aminopeptidase with possible vacuole function [ <i>Saccharomyces boulardii</i> ]     | 53.1  | 176.28 | 10.58 | 1 | 5 | 5 | 7 | 482  | 6.81 |
| KQC44233.1 | Chromatin remodeler that regulates various aspects of transcription [ <i>Saccharomyces boulardii</i> ]    | 168.1 | 175.77 | 3.41  | 1 | 4 | 4 | 4 | 1468 | 6.35 |
| KQC44149.1 | hypothetical protein AB282_01813 [ <i>Saccharomyces boulardii</i> ]                                       | 84.9  | 175.59 | 10.77 | 1 | 7 | 7 | 7 | 752  | 6.25 |
| KQC40752.1 | Type II integral membrane protein [ <i>Saccharomyces boulardii</i> ]                                      | 80.1  | 175.48 | 7.50  | 2 | 4 | 4 | 4 | 720  | 4.69 |
| KQC43467.1 | GGA2p that regulates Arf1p, Arf2p to facilitate Golgi trafficking [ <i>Saccharomyces boulardii</i> ]      | 64.3  | 175.42 | 7.01  | 1 | 3 | 4 | 5 | 585  | 6.49 |
| KOH49014.1 | EMP70p Protein with a role in cellular adhesion and filamentous growth [ <i>Saccharomyces boulardii</i> ] | 64.7  | 174.69 | 6.68  | 2 | 2 | 3 | 4 | 569  | 6.05 |
| KQC41432.1 | Topoisomerase II [ <i>Saccharomyces boulardii</i> ]                                                       | 164.1 | 174.48 | 4.41  | 1 | 7 | 7 | 7 | 1428 | 7.14 |
| KQC40540.1 | Cytosolic and mitochondrial glutathione oxidoreductase [ <i>Saccharomyces boulardii</i> ]                 | 51.5  | 174.25 | 13.92 | 1 | 3 | 3 | 6 | 467  | 7.40 |
| KQC45460.1 | NADPH-dependent quinone reductase [ <i>Saccharomyces boulardii</i> ]                                      | 37.0  | 174.17 | 14.37 | 1 | 4 | 4 | 6 | 334  | 8.95 |
| KQC45246.1 | ssDNA-binding protein essential for mitochondrial genome maintenance [ <i>Saccharomyces boulardii</i> ]   | 15.4  | 173.93 | 21.48 | 1 | 3 | 3 | 4 | 135  | 8.34 |

|            |                                                                                                                |       |        |       |   |   |   |   |      |       |
|------------|----------------------------------------------------------------------------------------------------------------|-------|--------|-------|---|---|---|---|------|-------|
| KQC45717.1 | Guanine nucleotide exchange factor for Cdc42p [ <i>Saccharomyces boulardii</i> ]                               | 96.9  | 172.48 | 7.03  | 1 | 5 | 5 | 6 | 854  | 8.46  |
| KQC45086.1 | Rho GDP dissociation inhibitor [ <i>Saccharomyces boulardii</i> ]                                              | 23.1  | 171.80 | 15.35 | 1 | 2 | 2 | 3 | 202  | 6.04  |
| KQC44275.1 | Guanosine diphosphatase located in the Golgi [ <i>Saccharomyces boulardii</i> ]                                | 56.8  | 171.53 | 13.71 | 1 | 4 | 4 | 4 | 518  | 5.35  |
| KQC44452.1 | COX15p required for the hydroxylation of heme O to form heme A [ <i>Saccharomyces boulardii</i> ]              | 54.6  | 171.51 | 9.26  | 1 | 3 | 3 | 4 | 486  | 10.17 |
| KQC41441.1 | GTP-binding protein [ <i>Saccharomyces boulardii</i> ]                                                         | 34.7  | 171.10 | 15.53 | 1 | 3 | 3 | 3 | 322  | 7.27  |
| KQC45162.1 | hypothetical protein AB282_01254 [ <i>Saccharomyces boulardii</i> ]                                            | 34.4  | 170.79 | 12.62 | 1 | 2 | 2 | 3 | 317  | 8.00  |
| KQC44466.1 | Rho GTPase activating protein (RhoGAP) [ <i>Saccharomyces boulardii</i> ]                                      | 245.2 | 170.78 | 2.68  | 2 | 5 | 5 | 5 | 2167 | 8.46  |
| KQC41208.1 | hypothetical protein AB282_04650 [ <i>Saccharomyces boulardii</i> ]                                            | 33.5  | 170.14 | 14.78 | 1 | 3 | 3 | 3 | 291  | 9.36  |
| KQC42308.1 | Epsin-like protein required for endocytosis and actin patch assembly [ <i>Saccharomyces boulardii</i> ]        | 72.0  | 169.95 | 6.18  | 1 | 3 | 3 | 3 | 615  | 5.54  |
| KQC40641.1 | Catalytic subunit of the i-AAA protease complex [ <i>Saccharomyces boulardii</i> ]                             | 81.7  | 169.55 | 4.69  | 1 | 3 | 3 | 3 | 747  | 7.08  |
| KQC43918.1 | General transcription elongation factor TFIIIS [ <i>Saccharomyces boulardii</i> ]                              | 34.8  | 169.11 | 17.48 | 1 | 5 | 5 | 5 | 309  | 8.87  |
| KOH48940.1 | NOC3p Subunit of a nuclear complex with Noc2p and pre-replicative complexes [ <i>Saccharomyces boulardii</i> ] | 75.5  | 169.02 | 4.83  | 2 | 2 | 3 | 4 | 663  | 5.95  |
| KQC40794.1 | Enolase, a phosphopyruvate hydratase [ <i>Saccharomyces boulardii</i> ]                                        | 47.3  | 168.79 | 9.15  | 2 | 4 | 4 | 5 | 437  | 5.24  |
| KQC44532.1 | Activating gamma subunit of the AMP-activated Snf1p kinase complex [ <i>Saccharomyces boulardii</i> ]          | 72.0  | 168.56 | 10.11 | 1 | 5 | 5 | 5 | 633  | 6.65  |
| KQC45379.1 | Beta 6 subunit of the 20S proteasome [ <i>Saccharomyces boulardii</i> ]                                        | 26.9  | 167.57 | 21.16 | 1 | 4 | 4 | 4 | 241  | 6.07  |
| KQC44202.1 | Integral membrane component of ER-derived COPII-coated vesicle [ <i>Saccharomyces boulardii</i> ]              | 50.4  | 167.31 | 6.29  | 1 | 2 | 2 | 2 | 445  | 5.97  |
| AGZ13692.1 | Rep1 protein, partial [ <i>Saccharomyces boulardii</i> ]                                                       | 42.9  | 167.18 | 11.89 | 2 | 3 | 3 | 3 | 370  | 6.54  |
| KQC43307.1 | metalloendopeptidase [ <i>Saccharomyces boulardii</i> ]                                                        | 77.4  | 166.42 | 9.20  | 1 | 6 | 6 | 6 | 696  | 7.50  |
| KQC44315.1 | Apyrase with wide substrate specificity [ <i>Saccharomyces boulardii</i> ]                                     | 71.8  | 165.55 | 3.81  | 1 | 1 | 1 | 2 | 630  | 6.24  |
| KQC40413.1 | RNA 5'-triphosphatase involved in mRNA 5' capping [ <i>Saccharomyces boulardii</i> ]                           | 61.8  | 165.54 | 5.46  | 1 | 2 | 2 | 5 | 549  | 5.60  |
| KQC44730.1 | Catalase A [ <i>Saccharomyces boulardii</i> ]                                                                  | 58.5  | 164.88 | 11.07 | 1 | 5 | 5 | 7 | 515  | 7.85  |
| KQC44047.1 | hypothetical protein AB282_02303 [ <i>Saccharomyces boulardii</i> ]                                            | 47.8  | 164.67 | 12.15 | 1 | 4 | 4 | 5 | 428  | 7.75  |
| KQC44053.1 | Cell death protease essential for hypochlorite-induced apoptosis [ <i>Saccharomyces boulardii</i> ]            | 83.1  | 164.62 | 6.24  | 1 | 4 | 4 | 4 | 737  | 4.50  |
| KOH49056.1 | DIP2p Nucleolar protein [ <i>Saccharomyces boulardii</i> ]                                                     | 106.2 | 164.31 | 5.41  | 2 | 4 | 4 | 4 | 943  | 6.13  |
| KQC45159.1 | NAD(+)-dependent glutamate dehydrogenase [ <i>Saccharomyces boulardii</i> ]                                    | 124.2 | 163.84 | 6.87  | 3 | 7 | 8 | 8 | 1092 | 5.78  |
| KQC44171.1 | Co-chaperone that stimulates HSP70 protein Ssc1p ATPase activity [ <i>Saccharomyces boulardii</i> ]            | 55.5  | 163.56 | 10.57 | 1 | 4 | 4 | 6 | 511  | 9.22  |
| KQC44673.1 | Subunit e of mitochondrial F1F0-ATPase [ <i>Saccharomyces boulardii</i> ]                                      | 10.9  | 162.76 | 30.21 | 1 | 2 | 2 | 3 | 96   | 6.10  |
| KQC42592.1 | Mitochondrial inner membrane protein [ <i>Saccharomyces boulardii</i> ]                                        | 36.8  | 162.74 | 9.12  | 1 | 2 | 2 | 2 | 362  | 4.74  |
| KQC42960.1 | hypothetical protein AB282_02745 [ <i>Saccharomyces boulardii</i> ]                                            | 22.5  | 162.63 | 13.64 | 1 | 2 | 2 | 2 | 198  | 8.60  |
| KQC43799.1 | Component of the small-subunit processome [ <i>Saccharomyces boulardii</i> ]                                   | 140.4 | 162.57 | 5.50  | 1 | 5 | 5 | 5 | 1237 | 8.46  |



|            |                                                                                                         |       |        |       |   |   |   |   |      |      |
|------------|---------------------------------------------------------------------------------------------------------|-------|--------|-------|---|---|---|---|------|------|
| KQC43262.1 | Cytoplasmic GTPase/eEF2-like factor involved in ribosomal biogenesis [ <i>Saccharomyces boulardii</i> ] | 27.9  | 162.24 | 21.60 | 1 | 3 | 4 | 4 | 250  | 5.55 |
| KQC43355.1 | 3-ketoacyl-CoA thiolase with broad chain length specificity [ <i>Saccharomyces boulardii</i> ]          | 44.7  | 162.16 | 15.83 | 1 | 4 | 4 | 4 | 417  | 7.61 |
| KQC45469.1 | hypothetical protein AB282_00231 [ <i>Saccharomyces boulardii</i> ]                                     | 57.8  | 161.36 | 6.99  | 1 | 3 | 3 | 4 | 501  | 6.46 |
| KQC42449.1 | Elongase [ <i>Saccharomyces boulardii</i> ]                                                             | 39.5  | 161.20 | 5.22  | 1 | 1 | 1 | 2 | 345  | 9.31 |
| KQC41264.1 | mRNA cap binding protein and translation initiation factor eIF4E [ <i>Saccharomyces boulardii</i> ]     | 24.2  | 161.05 | 28.64 | 1 | 6 | 6 | 7 | 213  | 5.49 |
| KQC41363.1 | hypothetical protein AB282_04224 [ <i>Saccharomyces boulardii</i> ]                                     | 27.5  | 160.18 | 14.11 | 1 | 4 | 4 | 5 | 241  | 5.45 |
| KQC44799.1 | Membrane anchor subunit of succinate dehydrogenase (SDH) [ <i>Saccharomyces boulardii</i> ]             | 20.2  | 160.13 | 14.92 | 1 | 2 | 2 | 2 | 181  | 8.90 |
| KQC44533.1 | hypothetical protein AB282_01274 [ <i>Saccharomyces boulardii</i> ]                                     | 25.2  | 159.74 | 17.86 | 1 | 3 | 3 | 3 | 224  | 6.54 |
| KQC43862.1 | hypothetical protein AB282_02118 [ <i>Saccharomyces boulardii</i> ]                                     | 52.9  | 159.62 | 17.83 | 9 | 6 | 7 | 7 | 471  | 6.90 |
| KQC42639.1 | MRT4p involved in mRNA turnover and ribosome assembly [ <i>Saccharomyces boulardii</i> ]                | 27.0  | 159.40 | 25.85 | 1 | 5 | 5 | 5 | 236  | 8.56 |
| KOH52146.1 | RGD1p GTPase-activating protein (RhoGAP) for Rho3p and Rho4p [ <i>Saccharomyces boulardii</i> ]         | 69.2  | 159.30 | 7.11  | 2 | 4 | 4 | 5 | 619  | 8.75 |
| KQC41689.1 | D-Arabinono-1,4-lactone oxidase [ <i>Saccharomyces boulardii</i> ]                                      | 59.5  | 158.59 | 9.13  | 1 | 4 | 4 | 4 | 526  | 6.80 |
| KQC43269.1 | hypothetical protein AB282_01345 [ <i>Saccharomyces boulardii</i> ]                                     | 36.0  | 158.18 | 4.89  | 1 | 1 | 1 | 2 | 327  | 6.29 |
| KQC42361.1 | Non-essential hydrolase involved in mRNA decapping [ <i>Saccharomyces boulardii</i> ]                   | 40.7  | 157.90 | 13.71 | 1 | 4 | 4 | 4 | 350  | 6.25 |
| KQC41699.1 | HMG-CoA reductase [ <i>Saccharomyces boulardii</i> ]                                                    | 115.6 | 157.81 | 6.55  | 1 | 5 | 5 | 6 | 1054 | 8.00 |
| KQC43126.1 | Vacuolar carboxypeptidase S [ <i>Saccharomyces boulardii</i> ]                                          | 64.5  | 157.38 | 10.42 | 1 | 6 | 6 | 6 | 576  | 5.53 |
| KQC43280.1 | 3-phosphoglycerate dehydrogenase [ <i>Saccharomyces boulardii</i> ]                                     | 51.2  | 157.18 | 13.86 | 2 | 5 | 5 | 5 | 469  | 6.54 |
| KOH51417.1 | BRE1p E3 ubiquitin ligase [ <i>Saccharomyces boulardii</i> ]                                            | 80.6  | 156.56 | 6.57  | 2 | 3 | 3 | 3 | 700  | 6.43 |
| KQC45451.1 | Pyridoxine (pyridoxamine) phosphate oxidase [ <i>Saccharomyces boulardii</i> ]                          | 26.9  | 156.53 | 16.23 | 1 | 3 | 3 | 4 | 228  | 7.49 |
| KQC45271.1 | RER1p involved in retention of membrane protein [ <i>Saccharomyces boulardii</i> ]                      | 20.1  | 156.48 | 20.24 | 2 | 3 | 3 | 4 | 168  | 8.97 |
| KQC43314.1 | Non-essential small GTPase of the Rho/Rac family of Ras-like protein [ <i>Saccharomyces boulardii</i> ] | 25.3  | 155.49 | 19.91 | 2 | 4 | 4 | 4 | 231  | 5.00 |
| KQC40545.1 | Subunit of Elongator complex [ <i>Saccharomyces boulardii</i> ]                                         | 63.6  | 155.15 | 6.46  | 1 | 3 | 3 | 5 | 557  | 9.00 |
| KQC45339.1 | Methionine aminopeptidase [ <i>Saccharomyces boulardii</i> ]                                            | 47.5  | 155.14 | 5.23  | 1 | 2 | 2 | 3 | 421  | 6.24 |
| KQC42059.1 | Alpha 6 subunit of the 20S proteasome [ <i>Saccharomyces boulardii</i> ]                                | 25.6  | 155.04 | 23.50 | 1 | 4 | 5 | 5 | 234  | 7.39 |
| KQC43460.1 | Ubiquitin-protein ligase (E3) [ <i>Saccharomyces boulardii</i> ]                                        | 46.1  | 154.11 | 2.64  | 2 | 1 | 1 | 2 | 416  | 6.79 |
| KQC40772.1 | GTPase-activating protein, stimulates the GTPase activity of Sar1p [ <i>Saccharomyces boulardii</i> ]   | 85.3  | 154.01 | 6.64  | 1 | 4 | 4 | 4 | 768  | 5.66 |
| KQC44514.1 | Pumilio domain protein [ <i>Saccharomyces boulardii</i> ]                                               | 75.0  | 153.89 | 4.42  | 1 | 3 | 3 | 4 | 656  | 6.89 |
| KQC41477.1 | Subunit of the THO complex [ <i>Saccharomyces boulardii</i> ]                                           | 183.8 | 153.79 | 1.63  | 1 | 2 | 2 | 3 | 1597 | 7.59 |
| KQC43177.1 | Saccharopine dehydrogenase (NAD <sup>+</sup> , L-lysine-forming) [ <i>Saccharomyces boulardii</i> ]     | 41.4  | 152.09 | 11.26 | 1 | 3 | 4 | 4 | 373  | 9.10 |
| KQC41504.1 | Plasma membrane protein [ <i>Saccharomyces boulardii</i> ]                                              | 40.3  | 151.96 | 8.20  | 1 | 2 | 2 | 4 | 366  | 5.80 |
| KQC42286.1 | hypothetical protein AB282_03467 [ <i>Saccharomyces boulardii</i> ]                                     | 22.1  | 151.20 | 19.90 | 1 | 3 | 3 | 3 | 201  | 5.15 |

|            |                                                                                                        |       |        |       |   |   |   |   |      |       |
|------------|--------------------------------------------------------------------------------------------------------|-------|--------|-------|---|---|---|---|------|-------|
| KOH49830.1 | ESS1p Peptidylprolyl-cis/trans-isomerase (PPIase) [ <i>Saccharomyces boulardii</i> ]                   | 19.2  | 151.07 | 22.35 | 2 | 3 | 3 | 3 | 170  | 8.72  |
| KOH52405.1 | NCL1p S-adenosyl-L-methionine-dependent tRNA: m5C-methyltransferase [ <i>Saccharomyces boulardii</i> ] | 77.5  | 150.26 | 5.28  | 2 | 2 | 2 | 2 | 682  | 7.23  |
| KQC43574.1 | Oxysterol-binding protein [ <i>Saccharomyces boulardii</i> ]                                           | 49.8  | 149.93 | 5.26  | 2 | 2 | 2 | 5 | 437  | 7.23  |
| KQC45501.1 | Subunit of heteropentameric Replication factor C (RF-C) [ <i>Saccharomyces boulardii</i> ]             | 39.9  | 148.73 | 9.89  | 1 | 3 | 3 | 3 | 354  | 8.05  |
| KQC43530.1 | NADP-cytochrome P450 reductase [ <i>Saccharomyces boulardii</i> ]                                      | 76.7  | 148.58 | 5.93  | 1 | 4 | 4 | 4 | 691  | 5.19  |
| KQC40418.1 | Hydrophilin essential in desiccation-rehydration process [ <i>Saccharomyces boulardii</i> ]            | 18.9  | 148.47 | 31.74 | 1 | 3 | 3 | 4 | 167  | 4.82  |
| KQC41400.1 | Subunit Va of cytochrome c oxidase [ <i>Saccharomyces boulardii</i> ]                                  | 17.1  | 148.07 | 26.14 | 1 | 3 | 3 | 3 | 153  | 9.82  |
| KQC42981.1 | Essential subunit of U3-containing 90S preribosome [ <i>Saccharomyces boulardii</i> ]                  | 77.7  | 147.58 | 5.26  | 1 | 3 | 3 | 3 | 666  | 8.15  |
| KQC44552.1 | Guanylate kinase [ <i>Saccharomyces boulardii</i> ]                                                    | 20.6  | 146.84 | 21.39 | 1 | 4 | 4 | 4 | 187  | 7.18  |
| KOH49799.1 | BBC1p Protein [ <i>Saccharomyces boulardii</i> ]                                                       | 126.1 | 146.76 | 4.05  | 2 | 4 | 4 | 5 | 1136 | 5.26  |
| KQC40692.1 | Transcription factor TFIIB [ <i>Saccharomyces boulardii</i> ]                                          | 38.1  | 146.43 | 9.86  | 1 | 2 | 2 | 2 | 345  | 8.60  |
| KQC42109.1 | hypothetical protein AB282_03289 [ <i>Saccharomyces boulardii</i> ]                                    | 32.2  | 146.37 | 15.05 | 2 | 4 | 4 | 6 | 279  | 9.96  |
| KQC40991.1 | RPS28Ap component of the small (40S) ribosomal subunit [ <i>Saccharomyces boulardii</i> ]              | 7.6   | 146.23 | 31.34 | 2 | 2 | 2 | 4 | 67   | 10.78 |
| KQC42116.1 | ABC type transmembrane transporter of MRP/CFTR family [ <i>Saccharomyces boulardii</i> ]               | 176.9 | 146.18 | 2.57  | 1 | 3 | 3 | 3 | 1559 | 7.65  |
| KQC42848.1 | Homoserine dehydrogenase (L-homoserine:NADP oxidoreductase) [ <i>Saccharomyces boulardii</i> ]         | 38.5  | 146.09 | 12.26 | 1 | 4 | 4 | 4 | 359  | 7.44  |
| KQC44878.1 | Essential evolutionarily conserved nucleolar protein [ <i>Saccharomyces boulardii</i> ]                | 33.2  | 145.01 | 8.63  | 1 | 2 | 2 | 7 | 278  | 5.29  |
| KQC43583.1 | 5-phospho-ribosyl-1(alpha)-pyrophosphate synthetase [ <i>Saccharomyces boulardii</i> ]                 | 35.1  | 144.59 | 8.44  | 1 | 2 | 2 | 3 | 320  | 8.29  |
| KQC42570.1 | Constituent of the TIM23 complex [ <i>Saccharomyces boulardii</i> ]                                    | 21.9  | 144.10 | 16.24 | 1 | 2 | 2 | 2 | 197  | 9.67  |
| KQC41780.1 | C-22 sterol desaturase [ <i>Saccharomyces boulardii</i> ]                                              | 61.3  | 143.93 | 10.22 | 1 | 5 | 5 | 6 | 538  | 7.91  |
| KQC40693.1 | Signal recognition particle (SRP) subunit [ <i>Saccharomyces boulardii</i> ]                           | 59.6  | 143.43 | 10.72 | 1 | 5 | 5 | 5 | 541  | 8.60  |
| KQC44216.1 | hypothetical protein AB282_01738 [ <i>Saccharomyces boulardii</i> ]                                    | 27.7  | 143.18 | 9.84  | 1 | 2 | 2 | 3 | 244  | 9.70  |
| KQC45660.1 | Mitochondrial serine hydroxymethyltransferase [ <i>Saccharomyces boulardii</i> ]                       | 53.7  | 142.08 | 10.61 | 1 | 4 | 5 | 5 | 490  | 8.72  |
| KQC41087.1 | Alpha' catalytic subunit of casein kinase 2 (CK2) [ <i>Saccharomyces boulardii</i> ]                   | 39.4  | 142.03 | 10.03 | 1 | 2 | 2 | 3 | 339  | 8.53  |
| KQC43925.1 | COPII-coated vesicle protein [ <i>Saccharomyces boulardii</i> ]                                        | 15.9  | 141.92 | 7.97  | 1 | 1 | 1 | 4 | 138  | 6.92  |
| KQC40900.1 | Constituent of 66S pre-ribosomal particle [ <i>Saccharomyces boulardii</i> ]                           | 51.3  | 141.91 | 5.87  | 1 | 2 | 2 | 3 | 460  | 7.14  |
| KQC42750.1 | clathrin Adaptor Protein complex Large chain [ <i>Saccharomyces boulardii</i> ]                        | 81.8  | 141.77 | 11.16 | 1 | 8 | 8 | 9 | 726  | 5.24  |
| KQC42628.1 | Poly(A) polymerase [ <i>Saccharomyces boulardii</i> ]                                                  | 59.9  | 141.72 | 7.02  | 2 | 3 | 3 | 3 | 527  | 8.03  |
| KQC44690.1 | Peptidyl-prolyl cis-trans isomerase (cyclophilin) of the ER [ <i>Saccharomyces boulardii</i> ]         | 25.3  | 141.55 | 22.67 | 1 | 4 | 4 | 4 | 225  | 5.60  |
| KQC41952.1 | C-8 sterol isomerase [ <i>Saccharomyces boulardii</i> ]                                                | 24.9  | 141.44 | 17.12 | 1 | 3 | 3 | 5 | 222  | 5.91  |
| KQC42360.1 | v-SNARE protein involved in Golgi transport [ <i>Saccharomyces boulardii</i> ]                         | 25.0  | 141.27 | 11.21 | 1 | 2 | 2 | 2 | 214  | 7.27  |

|            |                                                                                                          |       |        |       |   |   |   |   |      |       |
|------------|----------------------------------------------------------------------------------------------------------|-------|--------|-------|---|---|---|---|------|-------|
| KQC41707.1 | ERV46p [ <i>Saccharomyces boulardii</i> ]                                                                | 40.7  | 141.26 | 4.55  | 1 | 1 | 1 | 1 | 352  | 4.89  |
| KQC40592.1 | hypothetical protein AB282_05227 [ <i>Saccharomyces boulardii</i> ]                                      | 92.5  | 141.10 | 5.55  | 1 | 4 | 4 | 4 | 829  | 8.72  |
| KQC44116.1 | Cys-Gly metallo-di-peptidase [ <i>Saccharomyces boulardii</i> ]                                          | 52.9  | 140.06 | 4.57  | 1 | 2 | 2 | 4 | 481  | 5.67  |
| KQC44767.1 | Co-chaperone that binds Hsp82p and activates its ATPase activity [ <i>Saccharomyces boulardii</i> ]      | 39.4  | 139.81 | 7.43  | 1 | 2 | 2 | 4 | 350  | 7.47  |
| KQC43214.1 | ER protein with chaperone and co-chaperone activity [ <i>Saccharomyces boulardii</i> ]                   | 72.7  | 138.95 | 10.85 | 2 | 4 | 5 | 5 | 627  | 6.20  |
| KQC44750.1 | Homoaconitase [ <i>Saccharomyces boulardii</i> ]                                                         | 75.1  | 138.77 | 6.93  | 1 | 3 | 3 | 3 | 693  | 7.37  |
| KQC40409.1 | TSR1p required for processing of 20S pre-rRNA in the cytoplasm [ <i>Saccharomyces boulardii</i> ]        | 33.1  | 138.33 | 7.93  | 1 | 1 | 2 | 2 | 290  | 5.24  |
| KQC44335.1 | Delta 1-pyrroline-5-carboxylate reductase [ <i>Saccharomyces boulardii</i> ]                             | 30.1  | 137.77 | 11.89 | 1 | 3 | 3 | 3 | 286  | 5.64  |
| KQC43602.1 | Scaffold protein [ <i>Saccharomyces boulardii</i> ]                                                      | 210.3 | 137.49 | 2.57  | 1 | 4 | 4 | 4 | 1868 | 6.55  |
| KQC40505.1 | Histone H1, linker histone with roles in meiosis and sporulation [ <i>Saccharomyces boulardii</i> ]      | 27.8  | 137.48 | 10.08 | 1 | 3 | 3 | 3 | 258  | 10.21 |
| KQC43308.1 | Component of the Sec23p-Sec24p heterodimer of the COPII vesicle coat [ <i>Saccharomyces boulardii</i> ]  | 103.6 | 137.39 | 3.89  | 1 | 3 | 3 | 3 | 926  | 6.23  |
| KQC42514.1 | Subunit d of the V0 integral membrane domain of V-ATPase [ <i>Saccharomyces boulardii</i> ]              | 39.8  | 137.34 | 12.17 | 1 | 3 | 3 | 4 | 345  | 4.60  |
| KQC40835.1 | Transcription factor IIIA (TFIIIA) [ <i>Saccharomyces boulardii</i> ]                                    | 55.2  | 137.12 | 5.34  | 1 | 1 | 2 | 3 | 506  | 7.09  |
| KQC42081.1 | hypothetical protein AB282_03261 [ <i>Saccharomyces boulardii</i> ]                                      | 32.1  | 136.83 | 17.45 | 2 | 5 | 5 | 5 | 298  | 7.15  |
| KQC42393.1 | IMH1p involved in vesicular transport [ <i>Saccharomyces boulardii</i> ]                                 | 105.3 | 135.89 | 2.41  | 4 | 1 | 3 | 4 | 911  | 5.63  |
| KQC45599.1 | Subunit (90 kDa) of TFIID and SAGA complex [ <i>Saccharomyces boulardii</i> ]                            | 88.9  | 135.79 | 3.63  | 1 | 2 | 2 | 3 | 798  | 7.40  |
| KQC43703.1 | SNG1p involved in resistance to nitrosoguanidine and 6-azauracil [ <i>Saccharomyces boulardii</i> ]      | 61.3  | 135.64 | 4.75  | 1 | 2 | 2 | 3 | 547  | 8.73  |
| KQC41723.1 | Plasma membrane protein [ <i>Saccharomyces boulardii</i> ]                                               | 33.8  | 135.28 | 22.85 | 1 | 4 | 4 | 4 | 302  | 7.47  |
| KQC44050.1 | Component of the p24 complex [ <i>Saccharomyces boulardii</i> ]                                          | 23.3  | 134.77 | 15.27 | 1 | 3 | 3 | 4 | 203  | 6.79  |
| KQC42869.1 | zinc metalloprotease [ <i>Saccharomyces boulardii</i> ]                                                  | 52.3  | 134.60 | 8.83  | 1 | 4 | 4 | 5 | 453  | 7.91  |
| KQC43879.1 | C-3 sterol dehydrogenase [ <i>Saccharomyces boulardii</i> ]                                              | 38.7  | 134.02 | 8.60  | 1 | 3 | 3 | 4 | 349  | 6.68  |
| KQC44784.1 | Mitochondrial transcription elongation factor [ <i>Saccharomyces boulardii</i> ]                         | 76.2  | 133.75 | 6.93  | 1 | 4 | 5 | 5 | 664  | 8.98  |
| KQC40950.1 | hypothetical protein AB282_04880 [ <i>Saccharomyces boulardii</i> ]                                      | 21.2  | 133.47 | 15.68 | 1 | 3 | 3 | 3 | 185  | 9.60  |
| KQC42398.1 | 3-phosphoserine aminotransferase [ <i>Saccharomyces boulardii</i> ]                                      | 60.0  | 133.47 | 7.12  | 1 | 3 | 3 | 3 | 520  | 5.48  |
| KQC43575.1 | Ribosomal 60S subunit protein L14B [ <i>Saccharomyces boulardii</i> ]                                    | 15.1  | 133.41 | 25.36 | 1 | 4 | 4 | 5 | 138  | 10.93 |
| KQC40993.1 | Dynamin-like GTPase that mediates homotypic ER fusion [ <i>Saccharomyces boulardii</i> ]                 | 89.4  | 133.33 | 4.64  | 1 | 3 | 3 | 3 | 776  | 5.29  |
| KQC44170.1 | Plasma membrane protein involved in maintaining membrane organization [ <i>Saccharomyces boulardii</i> ] | 11.6  | 132.91 | 24.77 | 1 | 2 | 2 | 2 | 109  | 5.60  |
| KQC43468.1 | Component of the septin ring that is required for cytokinesis [ <i>Saccharomyces boulardii</i> ]         | 46.6  | 132.17 | 11.79 | 1 | 4 | 4 | 4 | 407  | 7.99  |
| KQC41883.1 | Glycoprotein subunit of transmembrane ring of nuclear pore complex [ <i>Saccharomyces boulardii</i> ]    | 151.5 | 131.98 | 3.52  | 1 | 3 | 3 | 3 | 1337 | 6.74  |
| KQC44435.1 | ADP-ribosylation factor GTPase activating protein (ARF GAP) [ <i>Saccharomyces boulardii</i> ]           | 55.0  | 131.97 | 6.69  | 1 | 3 | 4 | 4 | 493  | 8.05  |

|            |                                                                                                                                  |       |        |       |   |   |   |   |      |       |
|------------|----------------------------------------------------------------------------------------------------------------------------------|-------|--------|-------|---|---|---|---|------|-------|
| KQC44850.1 | Serine/threonine protein kinase involved in regulation of exocytosis [ <i>Saccharomyces boulardii</i> ]                          | 120.0 | 131.68 | 3.48  | 1 | 3 | 3 | 3 | 1064 | 8.66  |
| KQC44757.1 | Adenylate kinase, required for purine metabolism [ <i>Saccharomyces boulardii</i> ]                                              | 24.2  | 131.57 | 15.77 | 1 | 3 | 4 | 4 | 222  | 6.70  |
| KQC40904.1 | HRK1p kinase [ <i>Saccharomyces boulardii</i> ]                                                                                  | 85.0  | 131.14 | 8.36  | 1 | 4 | 4 | 4 | 754  | 7.37  |
| KQC43483.1 | GAR1p component of the H/ACA snoRNP pseudouridylylase complex [ <i>Saccharomyces boulardii</i> ]                                 | 21.4  | 130.87 | 19.02 | 1 | 4 | 4 | 4 | 205  | 11.46 |
| KQC41130.1 | Glutamine-rich cytoplasmic cochaperone [ <i>Saccharomyces boulardii</i> ]                                                        | 37.2  | 130.21 | 15.03 | 1 | 4 | 4 | 4 | 346  | 4.79  |
| KQC45641.1 | ATPase subunit [ <i>Saccharomyces boulardii</i> ]                                                                                | 123.8 | 130.11 | 4.68  | 5 | 4 | 5 | 5 | 1069 | 6.33  |
| KQC42472.1 | Ski complex component and putative RNA helicase [ <i>Saccharomyces boulardii</i> ]                                               | 145.8 | 129.99 | 2.49  | 1 | 2 | 2 | 2 | 1287 | 6.87  |
| KQC43555.1 | Argininosuccinate lyase [ <i>Saccharomyces boulardii</i> ]                                                                       | 52.0  | 129.89 | 7.34  | 1 | 3 | 3 | 3 | 463  | 5.73  |
| KQC42676.1 | Plasma membrane protein that may act to generate normal levels of PI4P [ <i>Saccharomyces boulardii</i> ]                        | 40.5  | 128.60 | 3.97  | 1 | 1 | 1 | 2 | 353  | 7.27  |
| KQC45277.1 | Poly(A+) RNA-binding protein [ <i>Saccharomyces boulardii</i> ]                                                                  | 59.4  | 127.93 | 9.98  | 1 | 4 | 4 | 4 | 521  | 5.94  |
| KQC44674.1 | Mitochondrial ribosomal protein of the large subunit' [ <i>Saccharomyces boulardii</i> ]                                         | 42.8  | 127.11 | 7.63  | 1 | 2 | 2 | 4 | 367  | 9.60  |
| KQC44808.1 | Guanine nucleotide exchange factor (GEF) for ADP ribosylation factor [ <i>Saccharomyces boulardii</i> ]                          | 227.0 | 127.02 | 2.14  | 2 | 4 | 5 | 5 | 2011 | 4.79  |
| KQC45722.1 | Member of the DRG family of GTP-binding protein [ <i>Saccharomyces boulardii</i> ]                                               | 40.7  | 126.70 | 18.97 | 1 | 5 | 6 | 6 | 369  | 8.34  |
| KQC42644.1 | URB1p [ <i>Saccharomyces boulardii</i> ]                                                                                         | 203.3 | 126.36 | 2.44  | 1 | 3 | 3 | 4 | 1764 | 7.40  |
| KQC45431.1 | hypothetical protein AB282_00193 [ <i>Saccharomyces boulardii</i> ]                                                              | 22.5  | 126.15 | 11.82 | 1 | 2 | 2 | 2 | 203  | 6.15  |
| KQC45374.1 | Scaffold protein [ <i>Saccharomyces boulardii</i> ]                                                                              | 150.6 | 126.13 | 3.04  | 1 | 3 | 3 | 3 | 1381 | 4.70  |
| KQC43904.1 | Glucosidase II catalytic subunit [ <i>Saccharomyces boulardii</i> ]                                                              | 86.5  | 126.12 | 4.41  | 2 | 3 | 3 | 3 | 748  | 5.06  |
| KQC41553.1 | Phosphatidylinositol/phosphatidylcholine transfer protein [ <i>Saccharomyces boulardii</i> ]                                     | 40.7  | 125.95 | 10.26 | 1 | 3 | 3 | 3 | 351  | 7.96  |
| KQC42803.1 | Mitochondrial oxidoreductase [ <i>Saccharomyces boulardii</i> ]                                                                  | 40.8  | 125.93 | 6.99  | 1 | 2 | 2 | 2 | 372  | 4.39  |
| KQC44323.1 | Beta 4 subunit of the 20S proteasome [ <i>Saccharomyces boulardii</i> ]                                                          | 22.5  | 125.91 | 19.19 | 1 | 4 | 4 | 4 | 198  | 6.23  |
| KQC41928.1 | hypothetical protein AB282_03992 [ <i>Saccharomyces boulardii</i> ]                                                              | 31.1  | 125.42 | 6.20  | 1 | 1 | 1 | 1 | 274  | 6.05  |
| KQC42159.1 | Component of the RSC chromatin remodeling complex [ <i>Saccharomyces boulardii</i> ]                                             | 57.8  | 125.24 | 9.96  | 1 | 4 | 4 | 4 | 502  | 8.16  |
| KQC41668.1 | 2-hexaprenyl-6-methoxy-1,4-benzoquinone methyltransferase [ <i>Saccharomyces boulardii</i> ]                                     | 34.7  | 125.24 | 11.07 | 1 | 2 | 2 | 3 | 307  | 6.57  |
| KQC41848.1 | Nucleolar protein [ <i>Saccharomyces boulardii</i> ]                                                                             | 57.7  | 125.07 | 7.80  | 1 | 3 | 3 | 3 | 513  | 9.31  |
| KQC43977.1 | AMP-activated serine/threonine protein kinase [ <i>Saccharomyces boulardii</i> ]                                                 | 36.4  | 125.06 | 10.87 | 1 | 3 | 3 | 3 | 322  | 5.78  |
| KOH52513.1 | CCR4p Component of the CCR4-NOT transcriptional complex [ <i>Saccharomyces boulardii</i> ]                                       | 94.6  | 124.65 | 4.18  | 2 | 3 | 3 | 3 | 837  | 7.01  |
| KQC44498.1 | hypothetical protein AB282_00889 [ <i>Saccharomyces boulardii</i> ]                                                              | 55.9  | 123.30 | 9.20  | 1 | 5 | 5 | 5 | 500  | 6.16  |
| KQC43294.1 | Mitochondrial ribosomal protein of the small subunit [ <i>Saccharomyces boulardii</i> ]                                          | 30.5  | 123.11 | 4.92  | 1 | 1 | 1 | 2 | 264  | 6.25  |
| KQC40961.1 | Imidazoleglycerol-phosphate dehydratase [ <i>Saccharomyces boulardii</i> ]                                                       | 23.8  | 122.80 | 13.18 | 1 | 2 | 2 | 2 | 220  | 6.39  |
| KOH50681.1 | PMC1p Vacuolar Ca <sup>2+</sup> ATPase involved in depleting cytosol of Ca <sup>2+</sup> ions [ <i>Saccharomyces boulardii</i> ] | 130.7 | 122.80 | 3.07  | 2 | 3 | 3 | 3 | 1173 | 7.65  |

|            |                                                                                                               |       |        |       |    |   |   |   |      |       |
|------------|---------------------------------------------------------------------------------------------------------------|-------|--------|-------|----|---|---|---|------|-------|
| KQC44611.1 | Actin-associated protein [ <i>Saccharomyces boulardii</i> ]                                                   | 52.7  | 122.59 | 7.47  | 1  | 3 | 3 | 3 | 482  | 6.01  |
| KQC42505.1 | L-ornithine transaminase (OTase) [ <i>Saccharomyces boulardii</i> ]                                           | 46.1  | 122.32 | 5.19  | 1  | 2 | 2 | 2 | 424  | 6.95  |
| KQC45017.1 | Transport adaptor or symportin [ <i>Saccharomyces boulardii</i> ]                                             | 78.2  | 122.30 | 2.62  | 1  | 2 | 2 | 3 | 688  | 5.88  |
| KQC45678.1 | Subunit of the Ssh1 translocon complex [ <i>Saccharomyces boulardii</i> ]                                     | 53.3  | 122.22 | 4.69  | 1  | 2 | 2 | 3 | 490  | 8.09  |
| KQC43700.1 | hypothetical protein AB282_01956 [ <i>Saccharomyces boulardii</i> ]                                           | 26.3  | 121.78 | 10.22 | 1  | 2 | 2 | 2 | 225  | 5.55  |
| KQC43533.1 | Subunit G of the V1 peripheral membrane domain of V-ATPase [ <i>Saccharomyces boulardii</i> ]                 | 12.7  | 121.49 | 21.05 | 1  | 2 | 2 | 2 | 114  | 8.98  |
| KQC43304.1 | Phosphoinositide PI4,5P(2) binding protein, forms a complex with Slm2p [ <i>Saccharomyces boulardii</i> ]     | 77.9  | 121.39 | 4.37  | 1  | 3 | 3 | 4 | 686  | 7.94  |
| KQC43412.1 | Component of U4/U6-U5 snRNP complex [ <i>Saccharomyces boulardii</i> ]                                        | 279.3 | 120.95 | 1.41  | 1  | 3 | 3 | 4 | 2413 | 7.46  |
| KQC45818.1 | Nuclear thiol peroxidase [ <i>Saccharomyces boulardii</i> ]                                                   | 16.3  | 120.72 | 21.38 | 2  | 3 | 3 | 3 | 145  | 9.94  |
| KQC45141.1 | Mitochondrial GTP/GDP transporter [ <i>Saccharomyces boulardii</i> ]                                          | 33.2  | 120.63 | 16.67 | 1  | 5 | 5 | 5 | 300  | 10.02 |
| KQC45429.1 | hypothetical protein AB282_00191 [ <i>Saccharomyces boulardii</i> ]                                           | 15.3  | 120.46 | 11.76 | 1  | 2 | 2 | 4 | 136  | 11.43 |
| KQC43077.1 | NCA3p involved in mitochondrion organization [ <i>Saccharomyces boulardii</i> ]                               | 35.4  | 119.82 | 8.61  | 1  | 2 | 2 | 2 | 337  | 4.46  |
| KQC43736.1 | Nucleolar protein [ <i>Saccharomyces boulardii</i> ]                                                          | 44.7  | 119.78 | 9.86  | 1  | 3 | 3 | 3 | 416  | 4.93  |
| KQC41355.1 | Nucleolar protein [ <i>Saccharomyces boulardii</i> ]                                                          | 36.5  | 119.70 | 15.22 | 4  | 5 | 5 | 5 | 322  | 9.45  |
| KQC41640.1 | Histone deacetylase, component of both the Rpd3S and Rpd3L complex [ <i>Saccharomyces boulardii</i> ]         | 48.9  | 119.60 | 7.39  | 1  | 2 | 2 | 2 | 433  | 5.52  |
| KQC43639.1 | YTA7p that localizes to chromatin [ <i>Saccharomyces boulardii</i> ]                                          | 157.4 | 119.51 | 3.26  | 1  | 4 | 4 | 4 | 1379 | 5.19  |
| KQC43491.1 | Nuclear exosome-associated nucleic acid binding protein [ <i>Saccharomyces boulardii</i> ]                    | 21.0  | 119.49 | 10.33 | 1  | 2 | 2 | 3 | 184  | 9.58  |
| KQC44836.1 | Subunit of THO/TREX complex [ <i>Saccharomyces boulardii</i> ]                                                | 87.8  | 119.25 | 3.86  | 1  | 2 | 2 | 2 | 752  | 5.22  |
| KQC42060.1 | hypothetical protein AB282_04124 [ <i>Saccharomyces boulardii</i> ]                                           | 38.2  | 119.20 | 4.30  | 1  | 1 | 1 | 1 | 349  | 6.70  |
| KQC44397.1 | Nucleolar protein [ <i>Saccharomyces boulardii</i> ]                                                          | 62.3  | 118.49 | 4.87  | 1  | 2 | 2 | 2 | 554  | 9.45  |
| KQC41475.1 | Mitochondrial ribosomal component of the small subunit [ <i>Saccharomyces boulardii</i> ]                     | 56.3  | 118.44 | 9.26  | 1  | 4 | 4 | 4 | 486  | 9.64  |
| KQC43135.1 | Subunit of a Golgi mannosyltransferase complex [ <i>Saccharomyces boulardii</i> ]                             | 47.8  | 118.27 | 9.95  | 1  | 4 | 4 | 4 | 422  | 8.53  |
| KQC42497.1 | Coronin [ <i>Saccharomyces boulardii</i> ]                                                                    | 72.5  | 118.03 | 5.53  | 1  | 3 | 3 | 3 | 651  | 5.73  |
| KQC41718.1 | Calcineurin A [ <i>Saccharomyces boulardii</i> ]                                                              | 68.5  | 117.93 | 4.14  | 1  | 2 | 2 | 3 | 604  | 6.43  |
| KQC42407.1 | hypothetical protein AB282_03589 [ <i>Saccharomyces boulardii</i> ]                                           | 27.4  | 117.46 | 9.58  | 1  | 2 | 2 | 3 | 240  | 9.36  |
| KQC41770.1 | foot domain of RNA polymerase II [ <i>Saccharomyces boulardii</i> ]                                           | 59.6  | 117.02 | 4.89  | 1  | 2 | 2 | 3 | 511  | 5.50  |
| KQC41738.1 | RAD52p that stimulates strand exchange [ <i>Saccharomyces boulardii</i> ]                                     | 54.5  | 116.89 | 3.26  | 1  | 1 | 1 | 2 | 491  | 8.78  |
| KQC45036.1 | Mitochondrial external NADH dehydrogenase [ <i>Saccharomyces boulardii</i> ]                                  | 61.6  | 116.87 | 4.59  | 1  | 3 | 3 | 3 | 545  | 8.69  |
| KQC43760.1 | Subunit of the prohibitin complex (Phb1p-Phb2p) [ <i>Saccharomyces boulardii</i> ]                            | 31.4  | 116.51 | 7.67  | 1  | 2 | 2 | 2 | 287  | 8.25  |
| KQC45814.1 | fusion protein, partial [ <i>Saccharomyces boulardii</i> ]                                                    | 164.6 | 116.34 | 2.84  | 16 | 3 | 3 | 3 | 1446 | 7.87  |
| KQC44231.1 | Aminophospholipid translocase (flippase) [ <i>Saccharomyces boulardii</i> ]                                   | 177.7 | 116.19 | 1.91  | 1  | 2 | 2 | 2 | 1571 | 6.00  |
| KOH49794.1 | VPS53p Component of the GARP (Golgi-associated retrograde protein) complex [ <i>Saccharomyces boulardii</i> ] | 95.4  | 116.17 | 2.19  | 2  | 1 | 1 | 1 | 822  | 5.59  |
| KQC43292.1 | Nucleolar protein [ <i>Saccharomyces boulardii</i> ]                                                          | 84.0  | 116.07 | 4.16  | 1  | 2 | 2 | 2 | 721  | 6.11  |

|            |                                                                                                           |       |        |       |   |   |   |   |      |       |
|------------|-----------------------------------------------------------------------------------------------------------|-------|--------|-------|---|---|---|---|------|-------|
| KQC44702.1 | Signal recognition particle (SRP) receptor alpha subunit [ <i>Saccharomyces boulardii</i> ]               | 69.1  | 114.93 | 3.54  | 1 | 1 | 1 | 3 | 621  | 7.17  |
| KQC44038.1 | hydroxyacid dehydrogenase [ <i>Saccharomyces boulardii</i> ]                                              | 43.0  | 114.85 | 5.01  | 6 | 1 | 2 | 3 | 379  | 7.99  |
| KQC41825.1 | UBX domain-containing protein that interacts with Cdc48p [ <i>Saccharomyces boulardii</i> ]               | 47.0  | 114.75 | 10.10 | 1 | 3 | 3 | 3 | 416  | 8.84  |
| KOH47961.1 | TOP1p Topoisomerase 1 [ <i>Saccharomyces boulardii</i> ]                                                  | 89.9  | 114.69 | 6.24  | 2 | 5 | 5 | 6 | 769  | 8.73  |
| KQC43579.1 | Cdc42p-activated signal transducing kinase [ <i>Saccharomyces boulardii</i> ]                             | 102.4 | 114.33 | 2.45  | 1 | 2 | 2 | 3 | 939  | 7.33  |
| KQC44376.1 | hypothetical protein AB282_01632 [ <i>Saccharomyces boulardii</i> ]                                       | 27.8  | 114.11 | 14.40 | 1 | 2 | 3 | 3 | 250  | 6.16  |
| KQC41225.1 | Subunit of heteropentameric Replication factor C (RF-C) [ <i>Saccharomyces boulardii</i> ]                | 36.1  | 114.10 | 8.36  | 1 | 2 | 2 | 2 | 323  | 9.10  |
| KQC40875.1 | Transcriptional coactivator [ <i>Saccharomyces boulardii</i> ]                                            | 16.4  | 114.07 | 31.79 | 1 | 4 | 4 | 4 | 151  | 10.61 |
| KQC44615.1 | Plasma membrane protein, putative ammonium transporter [ <i>Saccharomyces boulardii</i> ]                 | 30.0  | 113.84 | 6.55  | 1 | 2 | 2 | 3 | 275  | 4.77  |
| KQC42381.1 | ATP synthase [ <i>Saccharomyces boulardii</i> ]                                                           | 14.1  | 113.84 | 11.29 | 1 | 1 | 1 | 2 | 124  | 4.68  |
| KQC45108.1 | Cytoplasmic DExD/H-box helicase, stimulates mRNA decapping [ <i>Saccharomyces boulardii</i> ]             | 57.5  | 112.82 | 8.30  | 1 | 3 | 3 | 3 | 506  | 7.97  |
| KQC45302.1 | hypothetical protein AB282_00574 [ <i>Saccharomyces boulardii</i> ]                                       | 87.1  | 112.53 | 3.55  | 1 | 3 | 3 | 4 | 760  | 5.35  |
| KQC44087.1 | Subunit of RNAPII-associated chromatin remodeling Paf1 complex [ <i>Saccharomyces boulardii</i> ]         | 65.8  | 112.40 | 6.81  | 1 | 4 | 4 | 4 | 558  | 5.39  |
| KQC41193.1 | 5-phospho-ribosyl-1(alpha)-pyrophosphate synthetase [ <i>Saccharomyces boulardii</i> ]                    | 53.5  | 111.86 | 3.63  | 1 | 1 | 1 | 1 | 496  | 7.28  |
| KQC43653.1 | Alpha 5 subunit of the 20S proteasome [ <i>Saccharomyces boulardii</i> ]                                  | 28.6  | 111.83 | 14.23 | 1 | 3 | 3 | 3 | 260  | 4.73  |
| KQC43320.1 | Bifunctional triacylglycerol lipase and 1-acyl DHAP reductase [ <i>Saccharomyces boulardii</i> ]          | 32.8  | 111.80 | 9.43  | 1 | 2 | 2 | 2 | 297  | 9.16  |
| KQC40997.1 | hypothetical protein AB282_04927 [ <i>Saccharomyces boulardii</i> ]                                       | 60.2  | 111.42 | 6.49  | 1 | 3 | 3 | 4 | 539  | 8.29  |
| KQC40370.1 | NAD(+)-dependent formate dehydrogenase [ <i>Saccharomyces boulardii</i> ]                                 | 38.4  | 111.33 | 17.63 | 3 | 4 | 4 | 5 | 346  | 7.20  |
| KOH52083.1 | PAT1p Deadenylation-dependent mRNA-decapping factor [ <i>Saccharomyces boulardii</i> ]                    | 88.5  | 111.26 | 5.90  | 2 | 4 | 5 | 5 | 796  | 7.39  |
| KQC42819.1 | 5-oxoprolinase [ <i>Saccharomyces boulardii</i> ]                                                         | 140.4 | 111.22 | 3.03  | 1 | 3 | 3 | 3 | 1286 | 6.77  |
| KQC41123.1 | Member of the p24 family involved in ER to Golgi transport [ <i>Saccharomyces boulardii</i> ]             | 23.5  | 111.17 | 12.08 | 1 | 2 | 2 | 2 | 207  | 6.79  |
| KQC45705.1 | Peroxisomal integral membrane protein [ <i>Saccharomyces boulardii</i> ]                                  | 19.9  | 111.05 | 10.56 | 1 | 1 | 1 | 1 | 180  | 8.05  |
| KQC43944.1 | RNA-Dependent ATPase, member of DExD/H-box family [ <i>Saccharomyces boulardii</i> ]                      | 58.8  | 110.80 | 5.16  | 3 | 2 | 3 | 3 | 523  | 9.13  |
| KQC42617.1 | Endosomal Rab family GTPase [ <i>Saccharomyces boulardii</i> ]                                            | 26.1  | 110.73 | 13.25 | 2 | 2 | 3 | 3 | 234  | 4.82  |
| KQC41165.1 | 1,3-beta-glucanosyltransferase [ <i>Saccharomyces boulardii</i> ]                                         | 51.9  | 110.64 | 8.68  | 1 | 3 | 3 | 4 | 484  | 4.64  |
| KQC41470.1 | KRE33p required for biogenesis of the small ribosomal subunit [ <i>Saccharomyces boulardii</i> ]          | 119.3 | 110.61 | 3.79  | 1 | 3 | 4 | 5 | 1056 | 7.94  |
| KQC45157.1 | rRNA-binding protein required for 40S ribosomal subunit biogenesis [ <i>Saccharomyces boulardii</i> ]     | 25.2  | 110.55 | 16.00 | 1 | 2 | 2 | 3 | 225  | 10.08 |
| KQC42997.1 | DEAD box RNA helicase [ <i>Saccharomyces boulardii</i> ]                                                  | 87.1  | 110.47 | 6.88  | 1 | 4 | 4 | 4 | 770  | 7.42  |
| KQC44260.1 | Vacuolar proteinase B (yscB) with H3 N-terminal endopeptidase activity [ <i>Saccharomyces boulardii</i> ] | 69.6  | 110.23 | 3.31  | 1 | 2 | 2 | 3 | 635  | 6.46  |

|            |                                                                                                         |       |        |       |   |   |   |   |      |      |
|------------|---------------------------------------------------------------------------------------------------------|-------|--------|-------|---|---|---|---|------|------|
| KQC42454.1 | Conserved ER protein translocation channel [ <i>Saccharomyces boulardii</i> ]                           | 52.9  | 109.33 | 7.08  | 1 | 4 | 4 | 4 | 480  | 9.35 |
| KQC42984.1 | Vacuolar membrane polyphosphate polymerase [ <i>Saccharomyces boulardii</i> ]                           | 38.2  | 108.99 | 10.88 | 1 | 3 | 3 | 3 | 340  | 5.60 |
| KQC42804.1 | Vesicle membrane protein (v-SNARE) with acyltransferase activity [ <i>Saccharomyces boulardii</i> ]     | 22.7  | 108.33 | 17.50 | 1 | 3 | 3 | 4 | 200  | 5.69 |
| KQC45458.1 | Multidrug transporter of the major facilitator superfamily [ <i>Saccharomyces boulardii</i> ]           | 181.6 | 107.89 | 2.42  | 2 | 3 | 3 | 4 | 1613 | 8.65 |
| KQC42722.1 | hypothetical protein AB282_03150 [ <i>Saccharomyces boulardii</i> ]                                     | 67.6  | 107.66 | 3.75  | 1 | 2 | 2 | 2 | 587  | 5.57 |
| KOH50683.1 | LEU1p Isopropylmalate isomerase [ <i>Saccharomyces boulardii</i> ]                                      | 85.8  | 107.58 | 4.11  | 2 | 4 | 4 | 5 | 779  | 5.90 |
| KQC40633.1 | Constituent of 66S pre-ribosomal particle [ <i>Saccharomyces boulardii</i> ]                            | 26.4  | 107.45 | 12.65 | 1 | 2 | 2 | 2 | 245  | 4.64 |
| KQC43475.1 | Subunit of SAGA and NuA4 histone acetyltransferase complex [ <i>Saccharomyces boulardii</i> ]           | 432.9 | 107.38 | 1.10  | 1 | 3 | 4 | 4 | 3744 | 6.57 |
| KQC40913.1 | Calcium-binding component of the spindle pole body (SPB) half-bridge [ <i>Saccharomyces boulardii</i> ] | 18.7  | 107.06 | 26.71 | 1 | 3 | 3 | 3 | 161  | 4.56 |
| KOH51392.1 | GET3p Guanine nucleotide exchange factor for Gpa1p [ <i>Saccharomyces boulardii</i> ]                   | 39.3  | 106.98 | 10.73 | 2 | 3 | 3 | 3 | 354  | 5.03 |
| KQC41736.1 | AMP deaminase [ <i>Saccharomyces boulardii</i> ]                                                        | 93.2  | 106.88 | 6.42  | 1 | 4 | 4 | 5 | 810  | 6.61 |
| KQC42516.1 | Peptidyl-prolyl cis-trans isomerase (PPIase) [ <i>Saccharomyces boulardii</i> ]                         | 43.9  | 106.76 | 10.20 | 1 | 1 | 3 | 3 | 392  | 4.65 |
| KQC40640.1 | hypothetical protein AB282_05275 [ <i>Saccharomyces boulardii</i> ]                                     | 45.1  | 106.48 | 9.98  | 1 | 3 | 3 | 3 | 401  | 8.31 |
| KQC42744.1 | Phosphoglucomutase, minor isoform [ <i>Saccharomyces boulardii</i> ]                                    | 63.0  | 106.36 | 3.68  | 2 | 2 | 2 | 3 | 570  | 7.03 |
| KQC42983.1 | Subunit of vacuolar transporter chaperone (VTC) complex [ <i>Saccharomyces boulardii</i> ]              | 41.3  | 106.18 | 3.14  | 1 | 1 | 1 | 2 | 350  | 7.33 |
| KQC41933.1 | Plasma membrane t-SNARE [ <i>Saccharomyces boulardii</i> ]                                              | 33.7  | 106.16 | 9.15  | 1 | 1 | 2 | 2 | 295  | 4.91 |
| KQC45645.1 | 3-deoxy-D-arabino-heptulosonate-7-phosphate (DAHP) synthase [ <i>Saccharomyces boulardii</i> ]          | 39.7  | 106.12 | 6.76  | 1 | 2 | 2 | 2 | 370  | 6.95 |
| KQC44802.1 | Mitochondrial ribosomal protein of the small subunit [ <i>Saccharomyces boulardii</i> ]                 | 37.4  | 105.94 | 12.54 | 1 | 3 | 3 | 3 | 319  | 9.23 |
| KQC44361.1 | Fe(II)/2-oxoglutarate-dependent dioxygenase family member [ <i>Saccharomyces boulardii</i> ]            | 74.0  | 105.88 | 4.50  | 1 | 2 | 2 | 2 | 644  | 5.43 |
| KQC41953.1 | Component of the TOM (translocase of outer membrane) complex [ <i>Saccharomyces boulardii</i> ]         | 42.0  | 105.76 | 6.98  | 1 | 2 | 2 | 2 | 387  | 5.54 |
| KQC40948.1 | Subunit of heteropentameric Replication factor C (RF-C) [ <i>Saccharomyces boulardii</i> ]              | 94.8  | 105.47 | 3.83  | 1 | 3 | 3 | 3 | 861  | 9.22 |
| KQC44661.1 | Karyopherin [ <i>Saccharomyces boulardii</i> ]                                                          | 142.1 | 105.47 | 1.47  | 1 | 1 | 1 | 1 | 1224 | 5.35 |
| KQC40441.1 | hypothetical protein AB282_05075 [ <i>Saccharomyces boulardii</i> ]                                     | 26.7  | 105.23 | 10.42 | 1 | 3 | 3 | 3 | 240  | 6.79 |
| KQC40566.1 | Essential component of the TIM23 complex [ <i>Saccharomyces boulardii</i> ]                             | 55.1  | 105.14 | 5.67  | 7 | 2 | 3 | 3 | 476  | 7.24 |
| KOH52314.1 | ECM33p GPI-anchored protein [ <i>Saccharomyces boulardii</i> ]                                          | 43.8  | 105.03 | 5.83  | 2 | 2 | 2 | 2 | 429  | 4.98 |
| KQC43008.1 | Flavoprotein subunit of succinate dehydrogenase [ <i>Saccharomyces boulardii</i> ]                      | 66.0  | 104.79 | 8.32  | 2 | 2 | 4 | 4 | 601  | 7.36 |
| KQC43961.1 | Nucleotide exchange factor for Gsp1p [ <i>Saccharomyces boulardii</i> ]                                 | 53.0  | 104.78 | 7.68  | 1 | 4 | 4 | 4 | 482  | 6.10 |
| KQC41420.1 | Component of the SSU processome [ <i>Saccharomyces boulardii</i> ]                                      | 33.5  | 104.50 | 11.03 | 1 | 3 | 3 | 3 | 290  | 9.06 |
| KQC43295.1 | Homo-isocitrate dehydrogenase [ <i>Saccharomyces boulardii</i> ]                                        | 40.0  | 104.14 | 9.43  | 1 | 3 | 3 | 3 | 371  | 8.02 |

|            |                                                                                                           |       |        |       |   |   |   |   |      |      |
|------------|-----------------------------------------------------------------------------------------------------------|-------|--------|-------|---|---|---|---|------|------|
| KQC42462.1 | Cytoplasmic 60S subunit biogenesis factor [ <i>Saccharomyces boulardii</i> ]                              | 49.7  | 103.80 | 12.96 | 1 | 3 | 3 | 3 | 432  | 7.66 |
| KQC43379.1 | hypothetical protein AB282_02375 [ <i>Saccharomyces boulardii</i> ]                                       | 34.1  | 103.71 | 7.74  | 1 | 2 | 2 | 3 | 310  | 9.06 |
| KQC42310.1 | Structural component of 3 distinct complex [ <i>Saccharomyces boulardii</i> ]                             | 33.0  | 103.65 | 13.47 | 1 | 5 | 5 | 5 | 297  | 5.73 |
| KQC41272.1 | Peroxisomal protein required for medium-chain fatty acid oxidation [ <i>Saccharomyces boulardii</i> ]     | 26.9  | 103.51 | 14.83 | 1 | 3 | 3 | 4 | 236  | 9.83 |
| KQC44992.1 | putative ATP-dependent RNA helicase of the DEAD-box protein family [ <i>Saccharomyces boulardii</i> ]     | 112.9 | 103.18 | 2.71  | 1 | 3 | 3 | 3 | 995  | 9.09 |
| KQC42117.1 | PUF3p of the mitochondrial outer surface [ <i>Saccharomyces boulardii</i> ]                               | 98.0  | 103.12 | 5.01  | 1 | 4 | 4 | 4 | 879  | 7.08 |
| KQC45492.1 | Subunit of the SAGA transcriptional regulatory complex [ <i>Saccharomyces boulardii</i> ]                 | 152.4 | 102.92 | 1.43  | 7 | 1 | 2 | 2 | 1332 | 4.87 |
| KOH48186.1 | SIN4p Subunit of the RNA polymerase II mediator complex [ <i>Saccharomyces boulardii</i> ]                | 284.6 | 102.77 | 1.94  | 3 | 4 | 4 | 4 | 2527 | 6.37 |
| KOH52648.1 | OSH2p Member of an oxysterol-binding protein family with seven members [ <i>Saccharomyces boulardii</i> ] | 126.7 | 102.07 | 3.57  | 3 | 3 | 3 | 3 | 1121 | 6.65 |
| KQC42704.1 | Subunit C of the V1 peripheral membrane domain of V-ATPase [ <i>Saccharomyces boulardii</i> ]             | 44.2  | 101.93 | 6.38  | 1 | 2 | 2 | 2 | 392  | 6.67 |
| KQC41228.1 | Cytoplasmic tryptophanyl-tRNA synthetase [ <i>Saccharomyces boulardii</i> ]                               | 49.3  | 101.91 | 10.42 | 1 | 4 | 4 | 4 | 432  | 6.81 |
| KQC45546.1 | serine type carboxypeptidase [ <i>Saccharomyces boulardii</i> ]                                           | 57.7  | 101.90 | 6.30  | 1 | 3 | 3 | 4 | 508  | 5.45 |
| KQC44422.1 | RNA export factor associated with the nuclear pore complex (NPC) [ <i>Saccharomyces boulardii</i> ]       | 40.5  | 101.85 | 3.29  | 1 | 1 | 1 | 2 | 365  | 8.48 |
| KQC44314.1 | hypothetical protein AB282_01570 [ <i>Saccharomyces boulardii</i> ]                                       | 25.1  | 101.83 | 18.61 | 1 | 4 | 4 | 4 | 231  | 9.25 |
| KQC43333.1 | hypothetical protein AB282_01410 [ <i>Saccharomyces boulardii</i> ]                                       | 107.6 | 101.60 | 3.07  | 1 | 2 | 2 | 2 | 946  | 6.48 |
| KQC45755.1 | Translation elongation factor 1 beta [ <i>Saccharomyces boulardii</i> ]                                   | 22.7  | 101.35 | 17.39 | 1 | 2 | 2 | 2 | 207  | 4.42 |
| KQC43205.1 | Cytosolic J-domain-containing protein [ <i>Saccharomyces boulardii</i> ]                                  | 48.5  | 100.94 | 8.33  | 1 | 2 | 2 | 3 | 432  | 5.16 |
| KQC45792.1 | hypothetical protein AB282_05488 [ <i>Saccharomyces boulardii</i> ]                                       | 21.0  | 100.92 | 11.40 | 1 | 2 | 2 | 3 | 193  | 6.95 |
| KQC44295.1 | putative indolepyruvate decarboxylase family protein [ <i>Saccharomyces boulardii</i> ]                   | 61.2  | 100.77 | 4.82  | 1 | 2 | 2 | 2 | 560  | 7.66 |
| KQC43235.1 | RNA polymerase II third largest subunit B44 [ <i>Saccharomyces boulardii</i> ]                            | 35.3  | 100.62 | 5.66  | 1 | 1 | 1 | 3 | 318  | 4.67 |
| KOH51395.1 | RPN6p, non-ATPase regulatory subunit of the 26S proteasome lid [ <i>Saccharomyces boulardii</i> ]         | 49.7  | 100.30 | 6.22  | 2 | 2 | 2 | 2 | 434  | 6.28 |
| KQC42455.1 | Phosphatidylinositol transfer protein [ <i>Saccharomyces boulardii</i> ]                                  | 47.4  | 99.96  | 3.43  | 1 | 1 | 1 | 2 | 408  | 6.62 |
| KQC43593.1 | hypothetical protein AB282_02589 [ <i>Saccharomyces boulardii</i> ]                                       | 53.0  | 99.77  | 5.59  | 1 | 2 | 2 | 2 | 465  | 7.55 |
| KQC41406.1 | Nuclear actin-related protein involved in chromatin remodeling [ <i>Saccharomyces boulardii</i> ]         | 87.4  | 99.39  | 4.37  | 1 | 2 | 2 | 2 | 755  | 5.59 |
| KQC40857.1 | N-acetylglucosaminyltransferase [ <i>Saccharomyces boulardii</i> ]                                        | 57.5  | 99.11  | 6.72  | 1 | 3 | 3 | 3 | 491  | 8.37 |
| KQC40985.1 | Broad-specificity lysophospholipid acyltransferase [ <i>Saccharomyces boulardii</i> ]                     | 72.2  | 98.90  | 5.33  | 2 | 2 | 3 | 4 | 619  | 9.48 |
| KQC42137.1 | Essential protein required for ribosomal large subunit biogenesis [ <i>Saccharomyces boulardii</i> ]      | 21.8  | 98.79  | 10.00 | 1 | 2 | 2 | 2 | 180  | 9.74 |
| KQC41067.1 | hypothetical protein AB282_04509 [ <i>Saccharomyces boulardii</i> ]                                       | 43.7  | 98.57  | 3.62  | 1 | 1 | 1 | 1 | 387  | 8.18 |
| KOH49430.1 | RSC1p Component of the RSC chromatin remodeling complex [ <i>Saccharomyces boulardii</i> ]                | 72.2  | 98.48  | 3.68  | 2 | 2 | 2 | 3 | 625  | 5.24 |
| KQC44895.1 | Polyamine acetyltransferase [ <i>Saccharomyces boulardii</i> ]                                            | 21.9  | 98.21  | 11.52 | 1 | 2 | 2 | 2 | 191  | 5.82 |



|            |                                                                                                            |       |       |       |   |   |   |   |      |       |
|------------|------------------------------------------------------------------------------------------------------------|-------|-------|-------|---|---|---|---|------|-------|
| KQC45073.1 | Ubiquitin-specific protease [ <i>Saccharomyces boulardii</i> ]                                             | 84.9  | 98.15 | 6.59  | 1 | 4 | 4 | 4 | 743  | 4.83  |
| KQC44483.1 | Methylglyoxalase that converts methylglyoxal to D-lactate [ <i>Saccharomyces boulardii</i> ]               | 25.6  | 98.01 | 10.55 | 1 | 2 | 2 | 2 | 237  | 5.50  |
| KQC41046.1 | Polyphosphatidylinositol phosphatase [ <i>Saccharomyces boulardii</i> ]                                    | 124.5 | 97.29 | 2.17  | 1 | 2 | 2 | 3 | 1107 | 7.20  |
| KQC42897.1 | hypothetical protein AB282_02682 [ <i>Saccharomyces boulardii</i> ]                                        | 33.9  | 97.22 | 14.73 | 1 | 3 | 3 | 3 | 292  | 5.91  |
| KQC40454.1 | Component of the Rpd3L histone deacetylase complex [ <i>Saccharomyces boulardii</i> ]                      | 57.0  | 97.13 | 2.57  | 1 | 1 | 1 | 2 | 506  | 4.92  |
| KQC40909.1 | Essential non-ATPase regulatory subunit of the 26S proteasome [ <i>Saccharomyces boulardii</i> ]           | 38.3  | 97.09 | 7.99  | 1 | 3 | 3 | 3 | 338  | 5.64  |
| KQC45715.1 | Subunit of holo-CPF [ <i>Saccharomyces boulardii</i> ]                                                     | 88.4  | 96.95 | 3.18  | 1 | 2 | 2 | 2 | 785  | 6.15  |
| KQC45074.1 | hypothetical protein AB282_01157 [ <i>Saccharomyces boulardii</i> ]                                        | 35.6  | 96.76 | 4.49  | 1 | 1 | 1 | 1 | 312  | 5.95  |
| KQC41472.1 | hypothetical protein AB282_04333 [ <i>Saccharomyces boulardii</i> ]                                        | 41.1  | 96.74 | 5.59  | 1 | 2 | 2 | 2 | 376  | 6.21  |
| KQC41428.1 | EH domain-containing protein involved in endocytosis [ <i>Saccharomyces boulardii</i> ]                    | 40.3  | 96.59 | 6.30  | 1 | 2 | 2 | 2 | 349  | 5.47  |
| KQC40942.1 | RNA polymerase subunit ABC14.5 [ <i>Saccharomyces boulardii</i> ]                                          | 16.5  | 96.49 | 10.96 | 1 | 1 | 1 | 1 | 146  | 4.70  |
| KQC44881.1 | Integral membrane protein [ <i>Saccharomyces boulardii</i> ]                                               | 23.1  | 96.41 | 12.06 | 1 | 2 | 2 | 2 | 199  | 8.68  |
| KQC45121.1 | RNA-binding subunit of the TRAMP nuclear RNA surveillance complex [ <i>Saccharomyces boulardii</i> ]       | 33.6  | 96.20 | 5.78  | 2 | 1 | 1 | 1 | 294  | 8.56  |
| KQC44753.1 | Mitochondrial inner membrane protein [ <i>Saccharomyces boulardii</i> ]                                    | 23.6  | 96.06 | 9.76  | 1 | 2 | 2 | 2 | 205  | 9.23  |
| KQC45253.1 | Negative regulator of the H(+)-ATPase Pma1p [ <i>Saccharomyces boulardii</i> ]                             | 37.0  | 95.97 | 11.45 | 2 | 3 | 3 | 3 | 332  | 5.21  |
| KQC41563.1 | translation initiation factor eIF1 [ <i>Saccharomyces boulardii</i> ]                                      | 12.3  | 95.88 | 27.78 | 1 | 2 | 2 | 2 | 108  | 7.97  |
| KQC40987.1 | m(7)GpppX pyrophosphatase regulator [ <i>Saccharomyces boulardii</i> ]                                     | 41.0  | 95.65 | 5.93  | 1 | 2 | 2 | 3 | 354  | 6.64  |
| KQC41967.1 | GMP synthase [ <i>Saccharomyces boulardii</i> ]                                                            | 58.4  | 94.94 | 7.24  | 1 | 4 | 4 | 4 | 525  | 6.49  |
| KQC42691.1 | Nucleoside diphosphate kinase [ <i>Saccharomyces boulardii</i> ]                                           | 17.2  | 94.40 | 18.95 | 1 | 2 | 2 | 2 | 153  | 8.60  |
| KQC42688.1 | hypothetical protein AB282_03116 [ <i>Saccharomyces boulardii</i> ]                                        | 19.0  | 94.40 | 11.38 | 2 | 2 | 2 | 3 | 167  | 9.39  |
| KQC40426.1 | Mitochondrial protein required for assembly of cytochrome bc1 complex [ <i>Saccharomyces boulardii</i> ]   | 39.1  | 94.05 | 7.46  | 1 | 2 | 2 | 2 | 335  | 9.35  |
| KQC45752.1 | Mitochondrial protein [ <i>Saccharomyces boulardii</i> ]                                                   | 22.1  | 93.94 | 9.60  | 1 | 1 | 1 | 1 | 198  | 10.37 |
| KQC40489.1 | oxysterol binding protein family [ <i>Saccharomyces boulardii</i> ]                                        | 49.4  | 93.91 | 6.91  | 1 | 3 | 3 | 3 | 434  | 6.02  |
| KQC41519.1 | Chitin synthase I [ <i>Saccharomyces boulardii</i> ]                                                       | 167.2 | 93.72 | 1.43  | 2 | 2 | 2 | 3 | 1466 | 6.35  |
| KQC45315.1 | Nucleolar protein required for rRNA synthesis and ribosomal assembly [ <i>Saccharomyces boulardii</i> ]    | 37.1  | 93.59 | 10.13 | 1 | 3 | 3 | 3 | 316  | 9.39  |
| KQC44907.1 | hypothetical protein AB282_00973 [ <i>Saccharomyces boulardii</i> ]                                        | 131.9 | 93.55 | 2.24  | 2 | 2 | 2 | 2 | 1204 | 6.32  |
| KQC41163.1 | Mitochondrial protein [ <i>Saccharomyces boulardii</i> ]                                                   | 65.0  | 93.54 | 4.54  | 1 | 2 | 2 | 2 | 573  | 7.77  |
| KOH47373.1 | AIM45p protein [ <i>Saccharomyces boulardii</i> ]                                                          | 36.8  | 93.18 | 9.30  | 4 | 2 | 3 | 3 | 344  | 8.51  |
| KQC41580.1 | Integral membrane protein [ <i>Saccharomyces boulardii</i> ]                                               | 35.5  | 93.08 | 4.46  | 1 | 1 | 1 | 1 | 314  | 8.87  |
| KOH47277.1 | ELP4p Subunit of hexameric RecA-like ATPase Elp456 Elongator subcomplex [ <i>Saccharomyces boulardii</i> ] | 51.1  | 93.07 | 5.26  | 2 | 2 | 2 | 2 | 456  | 9.45  |
| KQC43496.1 | NMD2p involved in the nonsense-mediated mRNA decay (NMD) pathway [ <i>Saccharomyces boulardii</i> ]        | 126.5 | 93.04 | 3.12  | 2 | 1 | 3 | 3 | 1089 | 5.11  |
| KQC43853.1 | Highly-conserved N-terminally anchored AAA-ATPase [ <i>Saccharomyces boulardii</i> ]                       | 40.3  | 92.99 | 8.01  | 1 | 2 | 2 | 2 | 362  | 5.72  |

|            |                                                                                                           |       |       |       |   |   |   |   |      |       |
|------------|-----------------------------------------------------------------------------------------------------------|-------|-------|-------|---|---|---|---|------|-------|
| KQC40436.1 | HRR25p kinase [ <i>Saccharomyces boulardii</i> ]                                                          | 57.3  | 92.62 | 4.66  | 1 | 3 | 3 | 3 | 494  | 9.26  |
| KQC41265.1 | Acetylmornithine aminotransferase [ <i>Saccharomyces boulardii</i> ]                                      | 46.7  | 91.85 | 2.60  | 1 | 1 | 1 | 2 | 423  | 7.78  |
| KQC43565.1 | Mitochondrial manganese superoxide dismutase [ <i>Saccharomyces boulardii</i> ]                           | 25.8  | 91.84 | 9.87  | 1 | 2 | 2 | 2 | 233  | 8.48  |
| KQC45217.1 | Peptidyl-prolyl cis-trans isomerase (cyclophilin) [ <i>Saccharomyces boulardii</i> ]                      | 35.7  | 91.63 | 12.26 | 1 | 3 | 3 | 4 | 318  | 7.09  |
| KQC44145.1 | hypothetical protein AB282_01809 [ <i>Saccharomyces boulardii</i> ]                                       | 90.9  | 91.56 | 2.92  | 8 | 1 | 3 | 3 | 787  | 7.61  |
| KQC43721.1 | Squalene epoxidase [ <i>Saccharomyces boulardii</i> ]                                                     | 55.1  | 91.50 | 6.65  | 1 | 3 | 3 | 3 | 496  | 6.48  |
| KQC43874.1 | TFIIF (Transcription Factor II) middle subunit [ <i>Saccharomyces boulardii</i> ]                         | 46.6  | 91.31 | 5.50  | 1 | 2 | 2 | 2 | 400  | 7.17  |
| KQC45630.1 | Subunit of the ARP2/3 complex [ <i>Saccharomyces boulardii</i> ]                                          | 42.4  | 91.25 | 5.99  | 1 | 2 | 2 | 2 | 384  | 7.05  |
| KQC41065.1 | hypothetical protein AB282_04995 [ <i>Saccharomyces boulardii</i> ]                                       | 133.4 | 91.01 | 4.30  | 1 | 3 | 3 | 3 | 1186 | 7.31  |
| KQC41509.1 | Non-essential small GTPase of the Rho/Rac family of Ras-like protein [ <i>Saccharomyces boulardii</i> ]   | 36.8  | 90.94 | 4.23  | 1 | 1 | 1 | 1 | 331  | 8.48  |
| KQC42289.1 | Transcription cofactor [ <i>Saccharomyces boulardii</i> ]                                                 | 90.5  | 90.82 | 4.36  | 1 | 2 | 2 | 2 | 803  | 4.88  |
| KOH52297.1 | PBY1p putative tubulin tyrosine ligase associated with P-bodies [ <i>Saccharomyces boulardii</i> ]        | 52.7  | 90.81 | 3.74  | 2 | 1 | 1 | 1 | 454  | 4.75  |
| KQC44731.1 | Component of GID Complex that confers ubiquitin ligase (U3) activity [ <i>Saccharomyces boulardii</i> ]   | 49.1  | 90.77 | 4.51  | 1 | 1 | 2 | 3 | 421  | 8.24  |
| KQC43370.1 | Mitochondrial branched-chain amino acid (BCAA) aminotransferase [ <i>Saccharomyces boulardii</i> ]        | 43.6  | 90.62 | 7.12  | 2 | 2 | 2 | 2 | 393  | 8.91  |
| KQC43261.1 | Ribosomal 60S subunit protein L34B [ <i>Saccharomyces boulardii</i> ]                                     | 13.6  | 90.47 | 26.45 | 2 | 3 | 3 | 4 | 121  | 10.83 |
| KQC44695.1 | SSU and 90S preribosome component [ <i>Saccharomyces boulardii</i> ]                                      | 62.2  | 90.34 | 6.45  | 1 | 3 | 3 | 3 | 543  | 4.68  |
| KQC44281.1 | Subunit of the alpha-1,6 mannosyltransferase complex [ <i>Saccharomyces boulardii</i> ]                   | 58.0  | 89.75 | 7.01  | 1 | 3 | 3 | 3 | 499  | 5.33  |
| KQC41187.1 | Trifunctional enzyme of thiamine biosynthesis, degradation and salvage [ <i>Saccharomyces boulardii</i> ] | 61.2  | 89.58 | 3.81  | 1 | 2 | 2 | 2 | 551  | 6.16  |
| KQC41053.1 | Prephenate dehydrogenase involved in tyrosine biosynthesis [ <i>Saccharomyces boulardii</i> ]             | 46.0  | 89.58 | 8.14  | 1 | 3 | 3 | 3 | 393  | 6.62  |
| KQC45568.1 | Covalently-bound cell wall protein [ <i>Saccharomyces boulardii</i> ]                                     | 47.9  | 89.50 | 5.27  | 1 | 2 | 2 | 2 | 455  | 4.69  |
| KOH50951.1 | LOC1p Nuclear protein involved in asymmetric localization of ASH1 mRNA [ <i>Saccharomyces boulardii</i> ] | 23.6  | 89.41 | 9.80  | 2 | 2 | 2 | 2 | 204  | 10.26 |
| KQC40989.1 | Sphingoid long-chain base kinase [ <i>Saccharomyces boulardii</i> ]                                       | 69.7  | 89.40 | 3.04  | 1 | 1 | 1 | 1 | 624  | 6.44  |
| KQC41803.1 | Copper chaperone for superoxide dismutase Sod1p [ <i>Saccharomyces boulardii</i> ]                        | 27.3  | 89.00 | 5.22  | 1 | 1 | 1 | 2 | 249  | 6.67  |
| KQC42202.1 | hypothetical protein AB282_03382 [ <i>Saccharomyces boulardii</i> ]                                       | 50.9  | 88.73 | 9.46  | 1 | 3 | 3 | 3 | 444  | 9.17  |
| KQC44708.1 | Diacylglycerol pyrophosphate (DGPP) phosphatase [ <i>Saccharomyces boulardii</i> ]                        | 33.5  | 88.49 | 22.15 | 1 | 5 | 5 | 5 | 289  | 6.44  |
| KQC43245.1 | Alpha catalytic subunit of casein kinase 2 (CK2) [ <i>Saccharomyces boulardii</i> ]                       | 44.6  | 88.45 | 7.80  | 1 | 3 | 3 | 4 | 372  | 8.59  |
| KQC41649.1 | hypothetical protein AB282_03712 [ <i>Saccharomyces boulardii</i> ]                                       | 40.0  | 88.40 | 6.30  | 4 | 1 | 2 | 3 | 365  | 8.13  |
| KQC41814.1 | Subunit a of the vacuolar-ATPase V0 domain [ <i>Saccharomyces boulardii</i> ]                             | 101.6 | 87.92 | 4.16  | 1 | 3 | 3 | 3 | 890  | 5.38  |
| KQC43727.1 | hypothetical protein AB282_01983 [ <i>Saccharomyces boulardii</i> ]                                       | 10.5  | 87.27 | 14.13 | 1 | 1 | 1 | 2 | 92   | 9.99  |
| KQC43926.1 | Delta(9) fatty acid desaturase [ <i>Saccharomyces boulardii</i> ]                                         | 58.4  | 87.15 | 6.27  | 1 | 2 | 2 | 2 | 510  | 9.01  |

|            |                                                                                                           |       |       |       |   |   |   |   |      |      |
|------------|-----------------------------------------------------------------------------------------------------------|-------|-------|-------|---|---|---|---|------|------|
| KQC41092.1 | NOB1p involved in proteasomal and 40S ribosomal subunit biogenesis [ <i>Saccharomyces boulardii</i> ]     | 51.7  | 87.02 | 5.01  | 1 | 2 | 2 | 3 | 459  | 8.46 |
| KQC43240.1 | Subunit of a kinetochore-microtubule binding complex [ <i>Saccharomyces boulardii</i> ]                   | 15.9  | 86.82 | 9.22  | 1 | 1 | 1 | 1 | 141  | 8.12 |
| KQC44043.1 | Subunit VIa of cytochrome c oxidase [ <i>Saccharomyces boulardii</i> ]                                    | 15.0  | 86.77 | 21.71 | 1 | 3 | 3 | 4 | 129  | 8.18 |
| KQC41837.1 | ATP-dependent RNA helicase of the SFI superfamily [ <i>Saccharomyces boulardii</i> ]                      | 109.4 | 86.67 | 2.27  | 1 | 1 | 1 | 1 | 971  | 6.48 |
| KQC45331.1 | ECM21p involved in regulating endocytosis of plasma membrane protein [ <i>Saccharomyces boulardii</i> ]   | 123.5 | 86.63 | 3.22  | 1 | 3 | 3 | 3 | 1117 | 6.89 |
| KQC45373.1 | AAA ATPase and SNARE disassembly chaperone [ <i>Saccharomyces boulardii</i> ]                             | 32.0  | 86.44 | 7.34  | 1 | 2 | 2 | 2 | 286  | 5.02 |
| KQC41219.1 | Member of the protein disulfide isomerase (PDI) family [ <i>Saccharomyces boulardii</i> ]                 | 32.3  | 86.39 | 11.19 | 1 | 2 | 3 | 3 | 277  | 6.33 |
| KQC41101.1 | Ubiquitin-binding protein [ <i>Saccharomyces boulardii</i> ]                                              | 46.8  | 85.81 | 5.35  | 1 | 2 | 2 | 2 | 411  | 4.78 |
| KQC44140.1 | hypothetical protein AB282_01804 [ <i>Saccharomyces boulardii</i> ]                                       | 41.1  | 85.56 | 4.41  | 1 | 2 | 2 | 2 | 363  | 5.27 |
| KQC44309.1 | Beta subunit of the oligosaccharyl transferase glycoprotein complex [ <i>Saccharomyces boulardii</i> ]    | 49.4  | 85.44 | 6.05  | 1 | 2 | 2 | 2 | 430  | 5.90 |
| KQC42405.1 | hypothetical protein AB282_03587 [ <i>Saccharomyces boulardii</i> ]                                       | 59.4  | 85.16 | 2.87  | 1 | 1 | 1 | 1 | 523  | 5.68 |
| KQC42978.1 | Adenylate cyclase [ <i>Saccharomyces boulardii</i> ]                                                      | 228.7 | 85.01 | 1.18  | 3 | 2 | 3 | 3 | 2034 | 7.55 |
| KQC43561.1 | Target membrane receptor (t-SNARE) [ <i>Saccharomyces boulardii</i> ]                                     | 31.0  | 84.92 | 9.22  | 1 | 2 | 2 | 3 | 282  | 4.65 |
| KQC43789.1 | Cytoplasmic GTPase-activating protein [ <i>Saccharomyces boulardii</i> ]                                  | 109.2 | 84.38 | 2.53  | 1 | 2 | 2 | 2 | 950  | 5.39 |
| KQC41673.1 | Subunit of the signal recognition particle (SRP) [ <i>Saccharomyces boulardii</i> ]                       | 31.2  | 84.22 | 16.12 | 1 | 4 | 4 | 4 | 273  | 9.07 |
| KQC44332.1 | Nucleotide binding alpha subunit of the heterotrimeric G protein [ <i>Saccharomyces boulardii</i> ]       | 50.3  | 84.14 | 4.01  | 1 | 1 | 1 | 1 | 449  | 6.71 |
| KQC43260.1 | Mitochondrial protein required for transamination of isoleucine [ <i>Saccharomyces boulardii</i> ]        | 15.9  | 84.10 | 10.34 | 1 | 1 | 1 | 1 | 145  | 9.28 |
| KQC45176.1 | hypothetical protein AB282_01269 [ <i>Saccharomyces boulardii</i> ]                                       | 44.3  | 84.09 | 3.59  | 1 | 1 | 1 | 2 | 390  | 5.71 |
| KQC43897.1 | Subunit of the GET complex [ <i>Saccharomyces boulardii</i> ]                                             | 27.1  | 83.79 | 11.06 | 1 | 2 | 2 | 2 | 235  | 9.16 |
| KQC40570.1 | Plasma membrane ATP-binding cassette (ABC) transporter [ <i>Saccharomyces boulardii</i> ]                 | 170.9 | 83.75 | 2.05  | 1 | 3 | 3 | 3 | 1511 | 6.87 |
| KQC42169.1 | Microtubule-associated protein (MAP) of the XMAP215/Dis1 family [ <i>Saccharomyces boulardii</i> ]        | 100.9 | 83.71 | 3.38  | 1 | 2 | 2 | 2 | 888  | 8.57 |
| KQC41985.1 | GTPase activating protein (GAP) for Gsp1p [ <i>Saccharomyces boulardii</i> ]                              | 45.8  | 83.64 | 4.42  | 1 | 1 | 1 | 1 | 407  | 4.67 |
| KQC41544.1 | Adenylosuccinate synthase [ <i>Saccharomyces boulardii</i> ]                                              | 48.2  | 83.23 | 4.39  | 1 | 2 | 2 | 2 | 433  | 8.35 |
| KQC40917.1 | Subunit of protein N-terminal acetyltransferase NatA [ <i>Saccharomyces boulardii</i> ]                   | 19.7  | 82.98 | 17.61 | 1 | 2 | 2 | 2 | 176  | 7.91 |
| KQC43258.1 | putative aminophospholipid translocase (flippase) [ <i>Saccharomyces boulardii</i> ]                      | 130.1 | 82.62 | 0.96  | 1 | 1 | 1 | 2 | 1151 | 6.47 |
| KQC41514.1 | Ubiquitin-specific protease involved in transport and osmotic response [ <i>Saccharomyces boulardii</i> ] | 88.1  | 82.07 | 1.78  | 1 | 1 | 1 | 1 | 788  | 5.58 |
| KQC45518.1 | AIM3p that inhibits barbed-end actin filament elongation [ <i>Saccharomyces boulardii</i> ]               | 103.4 | 81.86 | 1.38  | 1 | 1 | 1 | 2 | 942  | 9.25 |
| KQC45716.1 | ERV29p [ <i>Saccharomyces boulardii</i> ]                                                                 | 46.2  | 81.82 | 5.78  | 1 | 2 | 2 | 2 | 415  | 6.83 |
| KQC42907.1 | Alpha-1,6-mannosyltransferase [ <i>Saccharomyces boulardii</i> ]                                          | 46.3  | 81.74 | 4.55  | 1 | 2 | 2 | 2 | 396  | 8.10 |

|            |                                                                                                           |       |       |       |   |   |   |   |      |      |
|------------|-----------------------------------------------------------------------------------------------------------|-------|-------|-------|---|---|---|---|------|------|
| KQC42132.1 | putative plasma membrane permease [ <i>Saccharomyces boulardii</i> ]                                      | 91.6  | 81.66 | 2.58  | 1 | 2 | 2 | 2 | 813  | 8.25 |
| KQC43899.1 | Subunit of the oligosaccharyltransferase complex of the ER lumen [ <i>Saccharomyces boulardii</i> ]       | 81.4  | 81.33 | 4.60  | 1 | 3 | 3 | 3 | 718  | 8.18 |
| KQC43399.1 | Conserved NADPH oxidoreductase containing flavin mononucleotide (FMN) [ <i>Saccharomyces boulardii</i> ]  | 45.0  | 81.31 | 2.25  | 1 | 1 | 1 | 2 | 400  | 6.39 |
| KQC40994.1 | GET4p [ <i>Saccharomyces boulardii</i> ]                                                                  | 36.2  | 81.25 | 8.33  | 1 | 2 | 2 | 2 | 312  | 5.20 |
| KQC42913.1 | Subunit of heteropentameric Replication factor C (RF-C) [ <i>Saccharomyces boulardii</i> ]                | 39.8  | 81.13 | 6.80  | 1 | 2 | 2 | 2 | 353  | 8.59 |
| KQC45040.1 | FG-nucleoporin component of central core of nuclear pore complex (NPC) [ <i>Saccharomyces boulardii</i> ] | 58.8  | 80.90 | 3.41  | 1 | 1 | 1 | 1 | 528  | 7.68 |
| KQC44981.1 | ERP3p with similarity to Emp24p and Erv25p [ <i>Saccharomyces boulardii</i> ]                             | 20.7  | 80.78 | 9.66  | 1 | 1 | 1 | 1 | 176  | 7.47 |
| KQC43916.1 | Aminolevulinate dehydratase [ <i>Saccharomyces boulardii</i> ]                                            | 37.7  | 80.69 | 5.56  | 1 | 1 | 1 | 1 | 342  | 6.14 |
| KQC41833.1 | Cohesion maintenance factor [ <i>Saccharomyces boulardii</i> ]                                            | 142.3 | 80.61 | 2.10  | 2 | 2 | 2 | 2 | 1237 | 6.39 |
| AGT20490.1 | alkaline phosphatase [ <i>Saccharomyces boulardii</i> ]                                                   | 63.0  | 80.50 | 2.65  | 1 | 1 | 1 | 3 | 566  | 5.59 |
| KQC41976.1 | NADP(+)-dependent serine dehydrogenase and carbonyl reductase [ <i>Saccharomyces boulardii</i> ]          | 29.2  | 80.44 | 5.24  | 1 | 1 | 1 | 1 | 267  | 6.81 |
| KQC45699.1 | NADP(+)-dependent glutamate dehydrogenase [ <i>Saccharomyces boulardii</i> ]                              | 49.6  | 79.58 | 8.97  | 1 | 1 | 4 | 4 | 457  | 5.47 |
| KOH50954.1 | RPN11p Metalloprotease subunit of 19S regulatory particle [ <i>Saccharomyces boulardii</i> ]              | 28.5  | 79.42 | 11.02 | 2 | 3 | 3 | 3 | 254  | 6.65 |
| KQC44963.1 | Ran GTPase binding protein [ <i>Saccharomyces boulardii</i> ]                                             | 23.9  | 79.20 | 5.26  | 1 | 1 | 1 | 2 | 209  | 6.43 |
| KQC44152.1 | hypothetical protein AB282_01816 [ <i>Saccharomyces boulardii</i> ]                                       | 55.4  | 79.13 | 3.73  | 1 | 1 | 1 | 1 | 482  | 5.88 |
| KQC40764.1 | hypothetical protein AB282_05399 [ <i>Saccharomyces boulardii</i> ]                                       | 22.5  | 79.12 | 12.50 | 9 | 2 | 3 | 3 | 200  | 6.55 |
| KQC41104.1 | Subunit of HIR nucleosome assembly complex [ <i>Saccharomyces boulardii</i> ]                             | 98.4  | 78.90 | 3.20  | 1 | 2 | 2 | 2 | 875  | 8.46 |
| KQC42923.1 | putative serine/threonine protein kinase [ <i>Saccharomyces boulardii</i> ]                               | 91.4  | 78.71 | 4.40  | 1 | 3 | 3 | 3 | 818  | 8.97 |
| KQC43517.1 | Component of the RSC chromatin remodeling complex [ <i>Saccharomyces boulardii</i> ]                      | 101.4 | 78.67 | 2.49  | 3 | 2 | 3 | 3 | 883  | 8.03 |
| KQC43043.1 | Nuclear actin-related protein involved in chromatin remodeling [ <i>Saccharomyces boulardii</i> ]         | 54.8  | 78.63 | 5.93  | 1 | 3 | 3 | 3 | 489  | 5.45 |
| KQC41119.1 | Mitochondrial matrix co-chaperonin [ <i>Saccharomyces boulardii</i> ]                                     | 11.4  | 78.30 | 19.81 | 1 | 2 | 2 | 2 | 106  | 9.00 |
| KQC43503.1 | tRNA(m(1)G37)methyltransferase [ <i>Saccharomyces boulardii</i> ]                                         | 54.3  | 78.29 | 3.13  | 1 | 1 | 1 | 1 | 480  | 8.54 |
| KOH49746.1 | IML2p protein [ <i>Saccharomyces boulardii</i> ]                                                          | 82.5  | 78.07 | 3.15  | 2 | 1 | 3 | 3 | 731  | 6.64 |
| KQC42542.1 | Integral membrane peptide transporter [ <i>Saccharomyces boulardii</i> ]                                  | 67.9  | 77.70 | 6.32  | 1 | 3 | 3 | 3 | 601  | 5.39 |
| KQC43189.1 | 18kDa catalytic subunit of the Signal Peptidase Complex (SPC) [ <i>Saccharomyces boulardii</i> ]          | 18.7  | 77.69 | 14.37 | 1 | 2 | 2 | 2 | 167  | 9.16 |
| KQC43253.1 | Microsomal cytochrome b reductase [ <i>Saccharomyces boulardii</i> ]                                      | 31.4  | 77.65 | 9.86  | 1 | 3 | 3 | 3 | 284  | 8.78 |
| KQC44460.1 | Coiled-coil 12S polarisome subunit [ <i>Saccharomyces boulardii</i> ]                                     | 48.2  | 77.58 | 2.38  | 1 | 1 | 1 | 2 | 420  | 5.59 |
| KQC43986.1 | Major isozyme of methylenetetrahydrofolate reductase [ <i>Saccharomyces boulardii</i> ]                   | 68.5  | 77.55 | 4.50  | 1 | 2 | 2 | 2 | 600  | 5.80 |
| KQC42354.1 | Rab family GTPase [ <i>Saccharomyces boulardii</i> ]                                                      | 29.1  | 77.53 | 9.27  | 1 | 1 | 2 | 2 | 259  | 8.60 |
| KQC41301.1 | putative GTPase [ <i>Saccharomyces boulardii</i> ]                                                        | 55.5  | 77.38 | 4.94  | 1 | 2 | 2 | 2 | 486  | 9.50 |
| KQC40509.1 | Vacuolar RNase of the T(2) family [ <i>Saccharomyces boulardii</i> ]                                      | 50.1  | 77.33 | 6.45  | 1 | 2 | 2 | 2 | 434  | 8.05 |

|            |                                                                                                       |       |       |       |   |   |   |   |      |      |
|------------|-------------------------------------------------------------------------------------------------------|-------|-------|-------|---|---|---|---|------|------|
| KQC42714.1 | GTPase activating factor for Rsr1p/Bud1p [ <i>Saccharomyces boulardii</i> ]                           | 126.6 | 77.30 | 1.63  | 5 | 1 | 2 | 2 | 1104 | 8.82 |
| KQC45080.1 | Ribosomal Protein P1 Beta [ <i>Saccharomyces boulardii</i> ]                                          | 10.7  | 77.14 | 15.09 | 1 | 1 | 1 | 1 | 106  | 4.01 |
| KQC44814.1 | Sm-like protein [ <i>Saccharomyces boulardii</i> ]                                                    | 83.4  | 76.99 | 3.31  | 1 | 2 | 2 | 2 | 724  | 7.30 |
| KQC43110.1 | Fructose-2,6-bisphosphatase, required for glucose metabolism [ <i>Saccharomyces boulardii</i> ]       | 52.6  | 76.99 | 3.98  | 1 | 2 | 2 | 2 | 452  | 6.81 |
| KQC44377.1 | Conserved nuclear RNA-binding protein [ <i>Saccharomyces boulardii</i> ]                              | 24.1  | 76.86 | 9.17  | 1 | 2 | 2 | 2 | 218  | 7.25 |
| KQC42596.1 | Essential subunit of the Dam1 complex (aka DASH complex) [ <i>Saccharomyces boulardii</i> ]           | 34.1  | 76.85 | 8.14  | 1 | 2 | 2 | 3 | 295  | 8.29 |
| KQC41971.1 | Found in Mitochondrial Proteome [ <i>Saccharomyces boulardii</i> ]                                    | 56.2  | 76.78 | 2.18  | 1 | 1 | 1 | 1 | 504  | 7.08 |
| KQC43702.1 | Cargo-transport protein involved in endocytosis [ <i>Saccharomyces boulardii</i> ]                    | 182.3 | 75.93 | 1.78  | 1 | 2 | 2 | 2 | 1570 | 6.16 |
| KOH52414.1 | RIB1p GTP cyclohydrolase II [ <i>Saccharomyces boulardii</i> ]                                        | 38.3  | 75.65 | 5.22  | 1 | 1 | 1 | 1 | 345  | 6.34 |
| KQC42211.1 | Alanine transaminase (glutamic pyruvic transaminase) [ <i>Saccharomyces boulardii</i> ]               | 62.6  | 75.63 | 7.71  | 1 | 3 | 3 | 3 | 558  | 6.60 |
| KQC43286.1 | Subunit of the CoA-Synthesizing Protein Complex (CoA-SPC) [ <i>Saccharomyces boulardii</i> ]          | 41.8  | 75.29 | 7.95  | 1 | 2 | 2 | 2 | 365  | 8.27 |
| KQC40497.1 | Conserved protein of the mitochondrial matrix [ <i>Saccharomyces boulardii</i> ]                      | 17.9  | 75.13 | 12.73 | 1 | 2 | 2 | 2 | 165  | 9.58 |
| KQC44649.1 | putative GPI-anchored aspartic protease [ <i>Saccharomyces boulardii</i> ]                            | 64.5  | 75.08 | 2.85  | 1 | 1 | 1 | 2 | 596  | 4.92 |
| KQC45557.1 | hypothetical protein AB282_00319 [ <i>Saccharomyces boulardii</i> ]                                   | 35.7  | 74.90 | 6.96  | 1 | 2 | 2 | 2 | 316  | 7.18 |
| KQC44125.1 | Subunit 6 of the ubiquinol cytochrome-c reductase complex [ <i>Saccharomyces boulardii</i> ]          | 17.2  | 74.90 | 9.52  | 1 | 1 | 1 | 1 | 147  | 4.09 |
| KQC44932.1 | ENA5p [ <i>Saccharomyces boulardii</i> ]                                                              | 120.1 | 74.90 | 2.20  | 1 | 2 | 2 | 2 | 1091 | 5.54 |
| KQC43127.1 | Subunit of heterotrimeric Replication Protein A (RPA) [ <i>Saccharomyces boulardii</i> ]              | 13.8  | 74.86 | 12.30 | 1 | 1 | 1 | 1 | 122  | 4.79 |
| KQC43282.1 | Epsilon-COP subunit of the coatomer [ <i>Saccharomyces boulardii</i> ]                                | 33.8  | 74.69 | 8.78  | 1 | 2 | 2 | 2 | 296  | 4.55 |
| KQC43792.1 | Component of RNA polymerase II holoenzyme [ <i>Saccharomyces boulardii</i> ]                          | 126.8 | 74.49 | 1.92  | 1 | 1 | 1 | 1 | 1146 | 9.29 |
| KQC44225.1 | RNA-dependent ATPase RNA helicase (DEIH box) [ <i>Saccharomyces boulardii</i> ]                       | 245.8 | 74.34 | 0.65  | 1 | 1 | 2 | 2 | 2162 | 5.53 |
| KQC43628.1 | Plasma membrane ATP-binding cassette (ABC) transporter [ <i>Saccharomyces boulardii</i> ]             | 166.6 | 74.22 | 0.95  | 1 | 1 | 1 | 1 | 1477 | 7.68 |
| KQC41223.1 | putative vacuolar membrane transporter [ <i>Saccharomyces boulardii</i> ]                             | 34.9  | 74.08 | 6.49  | 1 | 1 | 1 | 1 | 308  | 4.92 |
| KQC43382.1 | Nucleolar protein [ <i>Saccharomyces boulardii</i> ]                                                  | 65.2  | 73.95 | 4.87  | 1 | 2 | 2 | 3 | 575  | 4.86 |
| KQC43914.1 | Mannosyltransferase of the cis-Golgi apparatus [ <i>Saccharomyces boulardii</i> ]                     | 55.1  | 73.86 | 2.08  | 1 | 1 | 1 | 1 | 480  | 7.68 |
| KQC42322.1 | Nucleolar protein [ <i>Saccharomyces boulardii</i> ]                                                  | 91.0  | 73.81 | 1.59  | 1 | 1 | 1 | 1 | 817  | 5.43 |
| KQC40577.1 | Subunit of Golgi mannosyltransferase complex [ <i>Saccharomyces boulardii</i> ]                       | 37.6  | 73.69 | 6.13  | 1 | 2 | 2 | 2 | 326  | 6.09 |
| KQC45219.1 | Integral ER membrane protein that stimulates Sar1p GTPase activity [ <i>Saccharomyces boulardii</i> ] | 114.0 | 73.65 | 1.60  | 1 | 1 | 2 | 2 | 1065 | 4.73 |
| KQC43361.1 | hypothetical protein AB282_01438 [ <i>Saccharomyces boulardii</i> ]                                   | 85.0  | 73.55 | 0.93  | 4 | 1 | 1 | 2 | 864  | 4.45 |
| KQC41259.1 | RING-H2 domain core subunit of multiple ubiquitin ligase complex [ <i>Saccharomyces boulardii</i> ]   | 13.9  | 73.42 | 11.57 | 1 | 1 | 1 | 1 | 121  | 5.81 |
| KQC44313.1 | Mannose-6-phosphate isomerase [ <i>Saccharomyces boulardii</i> ]                                      | 48.2  | 73.40 | 4.20  | 1 | 2 | 2 | 2 | 429  | 5.99 |

|            |                                                                                                                  |       |       |       |   |   |   |   |      |       |
|------------|------------------------------------------------------------------------------------------------------------------|-------|-------|-------|---|---|---|---|------|-------|
| KQC42909.1 | Methylene-fatty-acyl-phospholipid synthase [ <i>Saccharomyces boulardii</i> ]                                    | 23.1  | 73.38 | 13.59 | 1 | 2 | 2 | 2 | 206  | 8.98  |
| KQC42099.1 | putative ATPase of the AAA family [ <i>Saccharomyces boulardii</i> ]                                             | 93.0  | 73.33 | 2.03  | 4 | 2 | 3 | 4 | 837  | 5.48  |
| KQC41066.1 | Gamma subunit of the oligosaccharyltransferase complex of the ER lumen [ <i>Saccharomyces boulardii</i> ]        | 39.4  | 73.32 | 5.43  | 1 | 2 | 2 | 2 | 350  | 8.48  |
| KQC43669.1 | SPG1p required for high temperature survival during stationary phase [ <i>Saccharomyces boulardii</i> ]          | 10.5  | 73.17 | 11.58 | 1 | 1 | 1 | 1 | 95   | 8.46  |
| KQC45837.1 | Arginase, catabolizes arginine to ornithine and urea [ <i>Saccharomyces boulardii</i> ]                          | 35.6  | 73.01 | 4.80  | 1 | 2 | 2 | 2 | 333  | 5.64  |
| KQC45758.1 | FG-nucleoporin component of central core of the nuclear pore complex [ <i>Saccharomyces boulardii</i> ]          | 56.4  | 72.96 | 5.68  | 1 | 2 | 2 | 2 | 511  | 9.41  |
| KQC41035.1 | Glycerol dehydrogenase [ <i>Saccharomyces boulardii</i> ]                                                        | 35.1  | 72.93 | 7.69  | 1 | 2 | 2 | 2 | 312  | 7.99  |
| KQC42643.1 | Subunit of the ARP2/3 complex [ <i>Saccharomyces boulardii</i> ]                                                 | 19.9  | 72.84 | 9.36  | 1 | 1 | 1 | 1 | 171  | 5.40  |
| KQC43501.1 | Lanosterol synthase [ <i>Saccharomyces boulardii</i> ]                                                           | 83.4  | 72.84 | 3.01  | 2 | 2 | 2 | 2 | 731  | 6.61  |
| KQC40549.1 | Essential protein involved in regulation of transcription [ <i>Saccharomyces boulardii</i> ]                     | 209.8 | 72.81 | 1.02  | 1 | 2 | 2 | 2 | 1867 | 6.57  |
| KOH52291.1 | EXO84p Exocyst subunit with dual roles in exocytosis and spliceosome assembly [ <i>Saccharomyces boulardii</i> ] | 85.5  | 72.67 | 1.46  | 2 | 1 | 1 | 1 | 753  | 7.94  |
| KQC41024.1 | Subunit of the membrane-associated retromer complex [ <i>Saccharomyces boulardii</i> ]                           | 63.0  | 72.66 | 3.81  | 1 | 3 | 3 | 3 | 551  | 7.58  |
| KQC40935.1 | Mitochondrial matrix cochaperone [ <i>Saccharomyces boulardii</i> ]                                              | 26.1  | 72.41 | 9.65  | 1 | 2 | 2 | 2 | 228  | 8.24  |
| KQC44185.1 | Alanine:glyoxylate aminotransferase (AGT) [ <i>Saccharomyces boulardii</i> ]                                     | 41.9  | 72.35 | 7.01  | 1 | 2 | 2 | 3 | 385  | 8.00  |
| KQC41939.1 | P subunit of the mitochondrial glycine decarboxylase complex [ <i>Saccharomyces boulardii</i> ]                  | 114.4 | 71.86 | 0.97  | 1 | 1 | 1 | 2 | 1034 | 7.25  |
| KQC40429.1 | tRNA:pseudouridine synthase [ <i>Saccharomyces boulardii</i> ]                                                   | 62.1  | 71.85 | 3.68  | 1 | 1 | 2 | 3 | 544  | 8.13  |
| KQC41776.1 | High-affinity glucose transporter of the major facilitator superfamily [ <i>Saccharomyces boulardii</i> ]        | 59.8  | 71.57 | 3.14  | 4 | 1 | 2 | 2 | 541  | 8.32  |
| KQC44312.1 | Constituent of 66S pre-ribosomal particle [ <i>Saccharomyces boulardii</i> ]                                     | 27.0  | 71.56 | 5.19  | 1 | 1 | 1 | 1 | 231  | 9.17  |
| KQC45296.1 | Cytoplasmic RNA-binding protein [ <i>Saccharomyces boulardii</i> ]                                               | 51.8  | 71.55 | 7.08  | 1 | 2 | 2 | 2 | 466  | 8.72  |
| KQC42843.1 | hypothetical protein AB282_02628 [ <i>Saccharomyces boulardii</i> ]                                              | 30.1  | 71.53 | 8.55  | 1 | 2 | 2 | 2 | 269  | 9.32  |
| KQC44416.1 | Lipid raft associated protein [ <i>Saccharomyces boulardii</i> ]                                                 | 48.3  | 71.49 | 4.19  | 1 | 2 | 2 | 2 | 430  | 8.95  |
| KQC42223.1 | 3-keto sterol reductase [ <i>Saccharomyces boulardii</i> ]                                                       | 39.7  | 71.30 | 7.49  | 1 | 3 | 3 | 3 | 347  | 8.73  |
| KQC44089.1 | Nuclear protein with decapping endonuclease activity [ <i>Saccharomyces boulardii</i> ]                          | 44.5  | 70.75 | 6.20  | 1 | 2 | 2 | 2 | 387  | 6.57  |
| KQC44159.1 | putative ATP-dependent RNA helicase [ <i>Saccharomyces boulardii</i> ]                                           | 69.4  | 70.28 | 1.98  | 1 | 1 | 1 | 1 | 606  | 9.04  |
| KQC45570.1 | Soluble GTPase with a role in regulation of membrane traffic [ <i>Saccharomyces boulardii</i> ]                  | 20.4  | 70.12 | 6.01  | 1 | 1 | 1 | 1 | 183  | 4.92  |
| KQC41050.1 | Exomer-dependent cargo protein [ <i>Saccharomyces boulardii</i> ]                                                | 32.1  | 70.10 | 4.26  | 1 | 1 | 1 | 1 | 282  | 5.77  |
| KQC44589.1 | Component of the pre-60S pre-ribosomal particle [ <i>Saccharomyces boulardii</i> ]                               | 28.0  | 70.03 | 3.83  | 1 | 1 | 1 | 1 | 235  | 9.38  |
| KQC44439.1 | NSA2p constituent of 66S pre-ribosomal particle [ <i>Saccharomyces boulardii</i> ]                               | 29.7  | 70.00 | 14.18 | 1 | 3 | 3 | 4 | 261  | 10.24 |
| KQC43373.1 | AGC family protein kinase [ <i>Saccharomyces boulardii</i> ]                                                     | 91.8  | 69.64 | 2.43  | 1 | 2 | 2 | 3 | 824  | 6.06  |
| KQC41148.1 | Histone variant H2AZ [ <i>Saccharomyces boulardii</i> ]                                                          | 14.3  | 69.61 | 14.18 | 1 | 2 | 2 | 2 | 134  | 10.65 |

|            |                                                                                                          |       |       |       |   |   |   |   |      |       |
|------------|----------------------------------------------------------------------------------------------------------|-------|-------|-------|---|---|---|---|------|-------|
| KQC42675.1 | hypothetical protein AB282_03103 [ <i>Saccharomyces boulardii</i> ]                                      | 103.2 | 69.57 | 1.74  | 1 | 1 | 2 | 2 | 922  | 6.10  |
| KQC43764.1 | Component of the small-subunit (SSU) processome [ <i>Saccharomyces boulardii</i> ]                       | 80.1  | 69.53 | 2.52  | 1 | 1 | 1 | 1 | 713  | 5.17  |
| KQC43324.1 | Component of cytosolic iron-sulfur protein assembly (CIA) machinery [ <i>Saccharomyces boulardii</i> ]   | 117.8 | 69.52 | 1.94  | 1 | 1 | 1 | 1 | 1032 | 5.90  |
| KQC45233.1 | Mitochondrial ribosomal protein of the large subunit [ <i>Saccharomyces boulardii</i> ]                  | 19.4  | 69.38 | 6.51  | 1 | 1 | 1 | 1 | 169  | 10.39 |
| KQC41765.1 | Monomeric glyoxalase I [ <i>Saccharomyces boulardii</i> ]                                                | 37.2  | 69.38 | 8.59  | 1 | 2 | 2 | 3 | 326  | 6.65  |
| KQC43418.1 | KEL1p required for proper cell fusion and cell morphology [ <i>Saccharomyces boulardii</i> ]             | 131.1 | 69.29 | 2.66  | 1 | 2 | 2 | 2 | 1164 | 5.35  |
| KQC40396.1 | hypothetical protein AB282_05030 [ <i>Saccharomyces boulardii</i> ]                                      | 29.5  | 69.14 | 6.11  | 1 | 2 | 2 | 2 | 262  | 7.49  |
| KQC43430.1 | CRP1p [ <i>Saccharomyces boulardii</i> ]                                                                 | 51.1  | 69.01 | 4.95  | 1 | 2 | 2 | 2 | 465  | 7.34  |
| KQC43739.1 | Essential component of CPF (cleavage and polyadenylation factor) [ <i>Saccharomyces boulardii</i> ]      | 47.0  | 68.97 | 2.35  | 1 | 1 | 1 | 1 | 425  | 6.27  |
| KQC43306.1 | 6-phosphofructo-2-kinase [ <i>Saccharomyces boulardii</i> ]                                              | 93.5  | 68.89 | 3.02  | 1 | 2 | 2 | 2 | 827  | 8.46  |
| KQC44007.1 | Bifunctional chorismate synthase and flavin reductase [ <i>Saccharomyces boulardii</i> ]                 | 40.8  | 68.51 | 5.85  | 1 | 2 | 2 | 2 | 376  | 7.80  |
| KQC42300.1 | N-myristoyl transferase [ <i>Saccharomyces boulardii</i> ]                                               | 52.7  | 68.46 | 2.42  | 1 | 1 | 1 | 1 | 455  | 7.69  |
| KQC44914.1 | Component of serine palmitoyltransferase [ <i>Saccharomyces boulardii</i> ]                              | 63.1  | 68.26 | 3.03  | 1 | 2 | 2 | 2 | 561  | 8.10  |
| KQC41543.1 | Mannosyltransferase, involved in N-linked glycosylation [ <i>Saccharomyces boulardii</i> ]               | 51.6  | 68.17 | 2.65  | 1 | 1 | 1 | 1 | 453  | 8.98  |
| KQC40745.1 | Peroxisomal adenine nucleotide transporter [ <i>Saccharomyces boulardii</i> ]                            | 36.3  | 68.16 | 3.35  | 1 | 1 | 1 | 1 | 328  | 9.77  |
| KOH47943.1 | RTS1p B-type regulatory subunit of protein phosphatase 2A (PP2A) [ <i>Saccharomyces boulardii</i> ]      | 85.3  | 68.04 | 2.91  | 2 | 2 | 2 | 3 | 757  | 6.32  |
| KQC41061.1 | hypothetical protein AB282_04991 [ <i>Saccharomyces boulardii</i> ]                                      | 39.5  | 68.04 | 3.77  | 1 | 1 | 1 | 1 | 345  | 9.33  |
| KQC45327.1 | PKC1p serine/threonine kinase [ <i>Saccharomyces boulardii</i> ]                                         | 131.4 | 67.99 | 1.82  | 1 | 2 | 2 | 3 | 1151 | 7.11  |
| KQC44462.1 | Ubiquitin-specific protease [ <i>Saccharomyces boulardii</i> ]                                           | 101.8 | 67.69 | 1.64  | 1 | 1 | 1 | 1 | 912  | 7.84  |
| KQC43692.1 | Cytoplasmic thioredoxin isoenzyme [ <i>Saccharomyces boulardii</i> ]                                     | 11.2  | 67.60 | 23.08 | 1 | 2 | 2 | 2 | 104  | 4.93  |
| KQC40583.1 | Nucleolar protein [ <i>Saccharomyces boulardii</i> ]                                                     | 77.7  | 67.57 | 2.77  | 1 | 2 | 2 | 2 | 685  | 9.03  |
| KQC44724.1 | hypothetical protein AB282_00772 [ <i>Saccharomyces boulardii</i> ]                                      | 30.6  | 67.51 | 9.56  | 1 | 2 | 2 | 2 | 272  | 5.41  |
| KQC45757.1 | Subunit of RNA polymerase III transcription initiation factor complex [ <i>Saccharomyces boulardii</i> ] | 132.1 | 67.40 | 1.03  | 1 | 1 | 1 | 2 | 1160 | 9.32  |
| KQC44366.1 | putative regulatory subunit of protein phosphatase Glc7p [ <i>Saccharomyces boulardii</i> ]              | 62.1  | 67.37 | 2.37  | 1 | 1 | 1 | 1 | 548  | 8.78  |
| KQC44327.1 | Microtubule plus end-tracking protein [ <i>Saccharomyces boulardii</i> ]                                 | 34.1  | 67.36 | 5.25  | 1 | 1 | 1 | 1 | 305  | 5.44  |
| KQC43504.1 | Exosome non-catalytic core component [ <i>Saccharomyces boulardii</i> ]                                  | 39.4  | 67.30 | 3.34  | 1 | 1 | 1 | 1 | 359  | 6.25  |
| KQC44645.1 | Cytoplasmic thioredoxin reductase [ <i>Saccharomyces boulardii</i> ]                                     | 34.2  | 67.26 | 15.36 | 2 | 2 | 2 | 2 | 319  | 5.94  |
| KQC45488.1 | hypothetical protein AB282_00250 [ <i>Saccharomyces boulardii</i> ]                                      | 18.3  | 66.95 | 13.58 | 1 | 2 | 2 | 2 | 162  | 5.05  |
| KQC42931.1 | Fumarate reductase, catalyzes the reduction of fumarate to succinate [ <i>Saccharomyces boulardii</i> ]  | 53.9  | 66.86 | 6.21  | 1 | 2 | 2 | 2 | 483  | 9.16  |
| KQC41753.1 | Asn rich cytoplasmic protein [ <i>Saccharomyces boulardii</i> ]                                          | 63.7  | 66.74 | 3.47  | 1 | 1 | 1 | 1 | 576  | 8.40  |
| KQC43408.1 | ATPase, putative RNA helicase of the DEAD-box family [ <i>Saccharomyces boulardii</i> ]                  | 47.8  | 66.43 | 5.57  | 1 | 2 | 2 | 2 | 431  | 9.61  |

|            |                                                                                                                      |       |       |       |   |   |   |   |      |       |
|------------|----------------------------------------------------------------------------------------------------------------------|-------|-------|-------|---|---|---|---|------|-------|
| KQC45838.1 | Peripheral peroxisomal membrane peroxin [ <i>Saccharomyces boulardii</i> ]                                           | 44.9  | 66.32 | 5.58  | 1 | 1 | 2 | 2 | 394  | 9.03  |
| KQC42755.1 | Subunit of succinate dehydrogenase and of TIM22 translocase [ <i>Saccharomyces boulardii</i> ]                       | 22.1  | 66.26 | 5.56  | 1 | 1 | 1 | 1 | 198  | 10.23 |
| KOH47919.1 | WHI2p Protein required for full activation of the general stress response [ <i>Saccharomyces boulardii</i> ]         | 52.6  | 66.21 | 4.35  | 2 | 2 | 2 | 2 | 460  | 6.07  |
| KQC40781.1 | RNA polymerase III subunit C82 [ <i>Saccharomyces boulardii</i> ]                                                    | 74.0  | 66.20 | 3.06  | 1 | 2 | 2 | 2 | 654  | 6.67  |
| KQC45707.1 | hypothetical protein AB282_00012 [ <i>Saccharomyces boulardii</i> ]                                                  | 87.4  | 65.85 | 2.30  | 1 | 2 | 2 | 2 | 783  | 7.94  |
| KQC42424.1 | hypothetical protein AB282_03606 [ <i>Saccharomyces boulardii</i> ]                                                  | 58.4  | 65.78 | 2.55  | 1 | 1 | 1 | 1 | 509  | 6.44  |
| KOH49762.1 | MRPL8p Mitochondrial ribosomal protein of the large subunit [ <i>Saccharomyces boulardii</i> ]                       | 26.9  | 65.67 | 10.92 | 2 | 1 | 1 | 2 | 238  | 9.73  |
| KQC43806.1 | Delta subunit of the translation initiation factor eIF2B [ <i>Saccharomyces boulardii</i> ]                          | 70.8  | 65.41 | 4.76  | 1 | 2 | 2 | 2 | 651  | 9.42  |
| KQC43960.1 | Homeodomain-containing protein and putative transcription factor [ <i>Saccharomyces boulardii</i> ]                  | 31.2  | 65.38 | 3.99  | 1 | 1 | 1 | 2 | 276  | 10.23 |
| KQC44861.1 | TMN2p with a role in cellular adhesion and filamentous growth [ <i>Saccharomyces boulardii</i> ]                     | 76.3  | 65.26 | 3.13  | 1 | 1 | 2 | 2 | 672  | 7.49  |
| KQC44381.1 | hypothetical protein AB282_01637 [ <i>Saccharomyces boulardii</i> ]                                                  | 19.0  | 65.11 | 13.04 | 1 | 2 | 2 | 2 | 161  | 6.18  |
| KQC42698.1 | Molecular chaperone of the endoplasmic reticulum lumen [ <i>Saccharomyces boulardii</i> ]                            | 99.6  | 65.01 | 2.38  | 1 | 2 | 2 | 2 | 881  | 5.31  |
| KQC45416.1 | Nucleolar protein required for export of tRNAs from the nucleus [ <i>Saccharomyces boulardii</i> ]                   | 287.4 | 64.90 | 1.24  | 1 | 3 | 4 | 4 | 2493 | 6.96  |
| KQC40498.1 | Mitochondrial inner membrane transporter [ <i>Saccharomyces boulardii</i> ]                                          | 34.2  | 64.85 | 6.77  | 1 | 2 | 2 | 2 | 310  | 9.86  |
| KQC41030.1 | Isoamyl acetate-hydrolyzing esterase [ <i>Saccharomyces boulardii</i> ]                                              | 27.3  | 64.79 | 5.88  | 1 | 1 | 1 | 1 | 238  | 5.50  |
| KQC43545.1 | Dipeptidyl aminopeptidase [ <i>Saccharomyces boulardii</i> ]                                                         | 93.4  | 64.74 | 1.83  | 1 | 1 | 1 | 1 | 818  | 5.52  |
| KOH47374.1 | HAL1p Cytoplasmic protein involved in halotolerance [ <i>Saccharomyces boulardii</i> ]                               | 33.0  | 64.51 | 6.12  | 2 | 1 | 1 | 1 | 294  | 8.79  |
| KQC40702.1 | Beta 5 subunit of the 20S proteasome [ <i>Saccharomyces boulardii</i> ]                                              | 31.6  | 64.32 | 12.89 | 1 | 3 | 3 | 3 | 287  | 6.23  |
| KQC44806.1 | Small heat shock protein (sHSP) with chaperone activity [ <i>Saccharomyces boulardii</i> ]                           | 42.8  | 64.26 | 4.53  | 1 | 2 | 2 | 3 | 375  | 5.08  |
| KQC42238.1 | Component of commitment complex [ <i>Saccharomyces boulardii</i> ]                                                   | 46.7  | 64.26 | 2.88  | 2 | 1 | 1 | 1 | 416  | 9.55  |
| KQC43861.1 | Subunit F of the V1 peripheral membrane domain of V-ATPase [ <i>Saccharomyces boulardii</i> ]                        | 13.5  | 64.18 | 28.81 | 1 | 3 | 3 | 3 | 118  | 5.05  |
| KQC41620.1 | Essential nucleolar protein required for 40S ribosome biogenesis [ <i>Saccharomyces boulardii</i> ]                  | 68.6  | 63.98 | 2.37  | 1 | 1 | 1 | 1 | 591  | 5.10  |
| KQC41771.1 | TFIID subunit (48 kDa) [ <i>Saccharomyces boulardii</i> ]                                                            | 42.2  | 63.91 | 2.84  | 1 | 1 | 1 | 1 | 388  | 9.66  |
| KQC44078.1 | Essential 113 kDa subunit of the exocyst complex [ <i>Saccharomyces boulardii</i> ]                                  | 133.0 | 63.40 | 1.74  | 1 | 2 | 2 | 2 | 1150 | 5.12  |
| KQC41632.1 | Calcium/H <sup>+</sup> antiporter localized to the endoplasmic reticulum membrane [ <i>Saccharomyces boulardii</i> ] | 102.4 | 63.31 | 2.42  | 1 | 2 | 2 | 2 | 908  | 7.15  |
| KOH51147.1 | MEI4p Meiosis-specific protein involved in forming DSBs [ <i>Saccharomyces boulardii</i> ]                           | 51.9  | 63.30 | 2.48  | 2 | 1 | 1 | 2 | 444  | 9.42  |
| KQC45226.1 | Conserved 90S pre-ribosomal component [ <i>Saccharomyces boulardii</i> ]                                             | 103.9 | 63.19 | 1.08  | 1 | 1 | 1 | 1 | 923  | 5.10  |
| KOH52197.1 | FTH1p putative high affinity iron transporter [ <i>Saccharomyces boulardii</i> ]                                     | 51.4  | 63.16 | 3.87  | 2 | 2 | 2 | 2 | 465  | 5.76  |
| KQC40613.1 | Zeta subunit of the coatomer complex (COPI) [ <i>Saccharomyces boulardii</i> ]                                       | 21.7  | 63.13 | 13.76 | 1 | 2 | 2 | 2 | 189  | 5.16  |



|            |                                                                                                      |       |       |       |   |   |   |   |      |       |
|------------|------------------------------------------------------------------------------------------------------|-------|-------|-------|---|---|---|---|------|-------|
| KQC41052.1 | Mitochondrial inner membrane carnitine transporter [ <i>Saccharomyces boulardii</i> ]                | 34.8  | 63.10 | 7.34  | 1 | 2 | 2 | 2 | 327  | 9.88  |
| KQC43834.1 | Mitochondrial outer membrane protein [ <i>Saccharomyces boulardii</i> ]                              | 20.1  | 63.07 | 6.42  | 1 | 2 | 2 | 3 | 187  | 8.53  |
| KQC41327.1 | Peptidyl-prolyl cis-trans isomerase (cyclophilin) [ <i>Saccharomyces boulardii</i> ]                 | 33.4  | 63.05 | 8.78  | 2 | 1 | 1 | 1 | 296  | 6.81  |
| KQC43521.1 | Subunit VI of cytochrome c oxidase (Complex IV) [ <i>Saccharomyces boulardii</i> ]                   | 17.3  | 62.83 | 18.24 | 1 | 3 | 3 | 3 | 148  | 6.05  |
| KQC44108.1 | Subunit of the 19S regulatory particle of the 26S proteasome lid [ <i>Saccharomyces boulardii</i> ]  | 31.9  | 62.60 | 5.11  | 5 | 1 | 2 | 2 | 274  | 4.92  |
| KQC44298.1 | GTT3p involved in glutathione metabolism [ <i>Saccharomyces boulardii</i> ]                          | 38.2  | 62.48 | 6.53  | 1 | 1 | 1 | 1 | 337  | 5.03  |
| KQC45538.1 | SHE3p adaptor between Myo4p and the She2p-mRNA complex [ <i>Saccharomyces boulardii</i> ]            | 47.5  | 62.41 | 2.82  | 1 | 1 | 1 | 1 | 425  | 8.87  |
| KOH52645.1 | TSC13p Enoyl reductase [ <i>Saccharomyces boulardii</i> ]                                            | 36.8  | 62.40 | 5.81  | 2 | 2 | 2 | 2 | 310  | 9.54  |
| KQC45725.1 | hypothetical protein AB282_00030 [ <i>Saccharomyces boulardii</i> ]                                  | 47.0  | 62.24 | 2.91  | 1 | 1 | 1 | 1 | 413  | 9.86  |
| KQC44643.1 | Inner plaque spindle pole body (SPB) component [ <i>Saccharomyces boulardii</i> ]                    | 111.7 | 62.15 | 1.59  | 1 | 1 | 1 | 1 | 944  | 7.08  |
| KQC45009.1 | glucose deprivation induced stress granule component [ <i>Saccharomyces boulardii</i> ]              | 19.8  | 62.11 | 7.57  | 1 | 1 | 1 | 1 | 185  | 10.35 |
| KQC42815.1 | Indole-3-glycerol-phosphate synthase [ <i>Saccharomyces boulardii</i> ]                              | 53.5  | 61.83 | 4.96  | 1 | 2 | 2 | 2 | 484  | 6.92  |
| KQC44852.1 | tRNA methyltransferase [ <i>Saccharomyces boulardii</i> ]                                            | 62.2  | 61.47 | 4.15  | 1 | 2 | 2 | 2 | 554  | 9.09  |
| KQC42305.1 | COQ9p required for ubiquinone biosynthesis and respiratory growth [ <i>Saccharomyces boulardii</i> ] | 29.9  | 61.43 | 5.38  | 1 | 1 | 1 | 1 | 260  | 8.79  |
| KQC40589.1 | Subunit beta1 of the nascent polypeptide-associated complex (NAC) [ <i>Saccharomyces boulardii</i> ] | 17.0  | 61.38 | 12.10 | 1 | 2 | 2 | 2 | 157  | 6.55  |
| KQC40722.1 | Polyamine transporter of the major facilitator superfamily [ <i>Saccharomyces boulardii</i> ]        | 68.1  | 61.22 | 2.09  | 1 | 1 | 1 | 1 | 622  | 7.06  |
| KQC41839.1 | Mitochondrial alcohol dehydrogenase isozyme III [ <i>Saccharomyces boulardii</i> ]                   | 40.3  | 61.09 | 4.80  | 1 | 2 | 2 | 2 | 375  | 8.43  |
| KQC41221.1 | MSH2p [ <i>Saccharomyces boulardii</i> ]                                                             | 108.8 | 60.88 | 2.59  | 1 | 2 | 2 | 2 | 964  | 6.15  |
| KQC43715.1 | E3 ubiquitin ligase (N-recognin) [ <i>Saccharomyces boulardii</i> ]                                  | 224.6 | 60.84 | 1.08  | 1 | 1 | 1 | 1 | 1950 | 5.57  |
| KQC43319.1 | SIM1p of the SUN family (Sim1p, Uth1p, Nca3p, Sun4p) [ <i>Saccharomyces boulardii</i> ]              | 48.0  | 60.82 | 3.80  | 1 | 2 | 2 | 2 | 474  | 4.60  |
| KQC41451.1 | Constituent of 66S pre-ribosomal particle [ <i>Saccharomyces boulardii</i> ]                         | 25.4  | 60.77 | 9.55  | 1 | 2 | 2 | 2 | 220  | 9.28  |
| KQC44328.1 | Mitochondrial inner membrane m-AAA protease component [ <i>Saccharomyces boulardii</i> ]             | 84.5  | 60.67 | 2.63  | 2 | 2 | 2 | 2 | 761  | 9.16  |
| KQC43738.1 | Phosphatidylethanolamine methyltransferase (PEMT) [ <i>Saccharomyces boulardii</i> ]                 | 101.2 | 60.65 | 1.73  | 1 | 1 | 2 | 2 | 869  | 8.51  |
| KQC44700.1 | Dihydrosphingosine phosphate lyase [ <i>Saccharomyces boulardii</i> ]                                | 65.5  | 60.43 | 3.57  | 1 | 3 | 3 | 3 | 589  | 8.03  |
| KQC43552.1 | RPS27Bp component of the small (40S) ribosomal subunit [ <i>Saccharomyces boulardii</i> ]            | 9.9   | 60.25 | 16.48 | 1 | 2 | 2 | 2 | 91   | 8.50  |
| KQC42144.1 | Methylthioadenosine phosphorylase (MTAP) [ <i>Saccharomyces boulardii</i> ]                          | 35.6  | 60.16 | 6.92  | 1 | 2 | 2 | 2 | 318  | 6.60  |
| KQC42577.1 | Glycogenin glucosyltransferase [ <i>Saccharomyces boulardii</i> ]                                    | 69.7  | 60.11 | 3.25  | 1 | 2 | 2 | 2 | 616  | 4.36  |
| KQC43122.1 | Subunit 8 of ubiquinol cytochrome-c reductase (Complex III) [ <i>Saccharomyces boulardii</i> ]       | 11.0  | 59.95 | 12.77 | 1 | 1 | 1 | 1 | 94   | 9.70  |

|            |                                                                                                                |       |       |       |   |   |   |   |      |       |
|------------|----------------------------------------------------------------------------------------------------------------|-------|-------|-------|---|---|---|---|------|-------|
| KQC44740.1 | Subunit of a Golgi mannosyltransferase complex [ <i>Saccharomyces boulardii</i> ]                              | 46.7  | 59.91 | 7.63  | 1 | 3 | 3 | 3 | 393  | 6.89  |
| KQC42006.1 | Translation initiation factor eIF1A [ <i>Saccharomyces boulardii</i> ]                                         | 17.5  | 59.88 | 7.19  | 1 | 1 | 1 | 1 | 153  | 4.83  |
| KQC45565.1 | GPI-anchored aspartyl protease [ <i>Saccharomyces boulardii</i> ]                                              | 38.7  | 59.83 | 3.17  | 1 | 1 | 1 | 1 | 347  | 9.42  |
| KQC45008.1 | 1-acyl-sn-glycerol-3-phosphate acyltransferase [ <i>Saccharomyces boulardii</i> ]                              | 33.8  | 59.83 | 2.97  | 1 | 1 | 1 | 1 | 303  | 9.54  |
| KQC40488.1 | Nucleolar protein [ <i>Saccharomyces boulardii</i> ]                                                           | 52.7  | 59.62 | 2.19  | 1 | 1 | 1 | 1 | 456  | 9.31  |
| KOH49710.1 | MTC1p protein [ <i>Saccharomyces boulardii</i> ]                                                               | 50.5  | 59.60 | 2.86  | 2 | 1 | 1 | 1 | 454  | 4.93  |
| KQC43723.1 | RBG2p with a role in translation [ <i>Saccharomyces boulardii</i> ]                                            | 41.0  | 59.42 | 5.43  | 1 | 2 | 2 | 2 | 368  | 8.56  |
| KQC44671.1 | Subunit of U3-containing 90S preribosome and SSU processome complex [ <i>Saccharomyces boulardii</i> ]         | 87.7  | 59.41 | 2.32  | 1 | 1 | 2 | 2 | 776  | 6.57  |
| KOH52035.1 | CWH43p putative sensor/transporter protein involved in cell wall biogenesis [ <i>Saccharomyces boulardii</i> ] | 107.8 | 59.40 | 1.26  | 1 | 1 | 1 | 1 | 953  | 6.25  |
| KQC44097.1 | High-affinity zinc transporter of the plasma membrane [ <i>Saccharomyces boulardii</i> ]                       | 41.3  | 59.25 | 3.48  | 1 | 1 | 1 | 2 | 374  | 5.60  |
| KQC44365.1 | Mitochondrial copper and phosphate carrier [ <i>Saccharomyces boulardii</i> ]                                  | 33.5  | 59.24 | 3.33  | 1 | 1 | 1 | 1 | 300  | 9.39  |
| KQC44318.1 | hypothetical protein AB282_01574 [ <i>Saccharomyces boulardii</i> ]                                            | 20.2  | 59.24 | 11.05 | 1 | 2 | 2 | 2 | 181  | 7.03  |
| KQC43429.1 | Mitochondrial ribosomal protein of the large subunit [ <i>Saccharomyces boulardii</i> ]                        | 23.8  | 59.17 | 6.54  | 1 | 1 | 1 | 1 | 214  | 9.96  |
| KQC42595.1 | ATPase of HSP70/DnaK family [ <i>Saccharomyces boulardii</i> ]                                                 | 46.6  | 59.12 | 3.80  | 1 | 1 | 1 | 1 | 421  | 7.42  |
| KQC43458.1 | Mitochondrial outer membrane protein [ <i>Saccharomyces boulardii</i> ]                                        | 71.8  | 58.90 | 1.56  | 1 | 1 | 1 | 2 | 639  | 6.14  |
| KQC45294.1 | Glutathione-dependent disulfide oxidoreductase [ <i>Saccharomyces boulardii</i> ]                              | 12.4  | 58.78 | 14.55 | 1 | 1 | 1 | 1 | 110  | 5.06  |
| KQC42862.1 | ENT3p containing an N-terminal epsin-like domain [ <i>Saccharomyces boulardii</i> ]                            | 45.1  | 58.75 | 5.64  | 1 | 2 | 2 | 2 | 408  | 4.84  |
| KQC42776.1 | cAMP-dependent protein kinase catalytic subunit [ <i>Saccharomyces boulardii</i> ]                             | 45.9  | 58.74 | 3.02  | 1 | 1 | 1 | 1 | 398  | 6.34  |
| KQC43613.1 | Transcription factor involved in iron utilization and homeostasis [ <i>Saccharomyces boulardii</i> ]           | 70.8  | 58.59 | 1.75  | 1 | 1 | 1 | 1 | 627  | 8.34  |
| KQC40617.1 | Vacuolar membrane protein [ <i>Saccharomyces boulardii</i> ]                                                   | 125.7 | 58.40 | 2.25  | 2 | 2 | 2 | 2 | 1110 | 5.19  |
| KQC45330.1 | Tetra-spanning membrane protein found mostly in the late Golgi [ <i>Saccharomyces boulardii</i> ]              | 24.3  | 58.38 | 5.58  | 1 | 1 | 1 | 1 | 215  | 8.84  |
| KQC43476.1 | hypothetical protein AB282_02472 [ <i>Saccharomyces boulardii</i> ]                                            | 103.9 | 58.38 | 2.26  | 1 | 2 | 2 | 2 | 929  | 6.29  |
| KQC42554.1 | hypothetical protein AB282_02982 [ <i>Saccharomyces boulardii</i> ]                                            | 39.6  | 58.36 | 2.62  | 1 | 1 | 1 | 1 | 344  | 9.09  |
| KQC43499.1 | Glutamine-dependent NAD(+) synthetase [ <i>Saccharomyces boulardii</i> ]                                       | 80.7  | 58.36 | 2.10  | 1 | 1 | 1 | 1 | 714  | 6.54  |
| KQC41583.1 | Phosphatidylinositol 4-kinase [ <i>Saccharomyces boulardii</i> ]                                               | 119.9 | 58.15 | 1.50  | 1 | 1 | 1 | 1 | 1066 | 6.40  |
| KQC42180.1 | C-5 sterol desaturase [ <i>Saccharomyces boulardii</i> ]                                                       | 42.7  | 57.95 | 4.66  | 1 | 2 | 2 | 3 | 365  | 7.69  |
| KQC40680.1 | Subunit of CCR4-NOT global transcriptional regulator [ <i>Saccharomyces boulardii</i> ]                        | 65.8  | 57.94 | 6.07  | 1 | 2 | 2 | 2 | 560  | 5.43  |
| KQC43449.1 | hypothetical protein AB282_02445 [ <i>Saccharomyces boulardii</i> ]                                            | 27.0  | 57.43 | 8.23  | 1 | 2 | 2 | 2 | 243  | 10.54 |
| KQC44008.1 | ATPase and nucleosome spacing factor [ <i>Saccharomyces boulardii</i> ]                                        | 171.3 | 57.26 | 2.35  | 1 | 3 | 3 | 3 | 1489 | 5.78  |
| KQC41389.1 | hypothetical protein AB282_04250 [ <i>Saccharomyces boulardii</i> ]                                            | 50.9  | 57.25 | 2.85  | 1 | 1 | 1 | 1 | 456  | 6.55  |
| KQC44353.1 | Methionine-S-sulfoxide reductase [ <i>Saccharomyces boulardii</i> ]                                            | 18.3  | 57.24 | 5.00  | 1 | 1 | 1 | 2 | 160  | 7.39  |

|            |                                                                                                        |       |       |       |   |   |   |   |      |       |
|------------|--------------------------------------------------------------------------------------------------------|-------|-------|-------|---|---|---|---|------|-------|
| KQC43244.1 | Beta subunit of the capping protein heterodimer (Cap1p and Cap2p) [ <i>Saccharomyces boulardii</i> ]   | 32.6  | 57.23 | 4.53  | 1 | 1 | 1 | 1 | 287  | 4.72  |
| KQC41816.1 | Mitochondrial inner membrane ADP/ATP translocator [ <i>Saccharomyces boulardii</i> ]                   | 34.1  | 57.10 | 8.74  | 1 | 2 | 3 | 3 | 309  | 9.70  |
| KQC43435.1 | Ribosomal 60S subunit protein L41A [ <i>Saccharomyces boulardii</i> ]                                  | 12.2  | 57.10 | 7.55  | 1 | 1 | 1 | 2 | 106  | 10.59 |
| KQC41157.1 | Exosome core complex catalytic subunit [ <i>Saccharomyces boulardii</i> ]                              | 113.6 | 56.91 | 1.40  | 1 | 1 | 2 | 2 | 1001 | 6.67  |
| KQC40920.1 | Component of the cleavage and polyadenylation factor I (CF I) [ <i>Saccharomyces boulardii</i> ]       | 50.2  | 56.68 | 2.70  | 1 | 1 | 1 | 1 | 445  | 5.87  |
| KQC41908.1 | hypothetical protein AB282_03972 [ <i>Saccharomyces boulardii</i> ]                                    | 29.0  | 56.43 | 6.27  | 1 | 1 | 1 | 1 | 255  | 9.32  |
| KQC41357.1 | Poly(A <sup>+</sup> ) RNA-binding protein [ <i>Saccharomyces boulardii</i> ]                           | 49.1  | 56.42 | 4.90  | 2 | 2 | 2 | 2 | 429  | 6.77  |
| KQC42237.1 | Subunit of the mRNA cleavage and polyadenylation factor (CPF) [ <i>Saccharomyces boulardii</i> ]       | 29.0  | 56.35 | 8.08  | 2 | 2 | 2 | 2 | 260  | 9.76  |
| KQC40910.1 | Gamma subunit of the translation initiation factor eIF2B [ <i>Saccharomyces boulardii</i> ]            | 65.7  | 56.24 | 4.84  | 1 | 2 | 2 | 2 | 578  | 4.96  |
| KQC43432.1 | RNA polymerase II second largest subunit B150 [ <i>Saccharomyces boulardii</i> ]                       | 7.7   | 56.18 | 28.57 | 1 | 1 | 1 | 1 | 70   | 9.76  |
| KQC44554.1 | Vacuolar endopolyphosphatase with a role in phosphate metabolism [ <i>Saccharomyces boulardii</i> ]    | 76.9  | 55.94 | 2.27  | 1 | 1 | 1 | 1 | 661  | 6.74  |
| KQC45643.1 | ENP1p [ <i>Saccharomyces boulardii</i> ]                                                               | 55.1  | 55.87 | 4.97  | 1 | 2 | 2 | 2 | 483  | 4.94  |
| KQC42378.1 | Beta subunit of the translation initiation factor eIF2B [ <i>Saccharomyces boulardii</i> ]             | 42.5  | 55.66 | 4.72  | 1 | 2 | 2 | 2 | 381  | 7.93  |
| KQC45508.1 | hypothetical protein AB282_00270 [ <i>Saccharomyces boulardii</i> ]                                    | 27.1  | 55.59 | 5.22  | 1 | 1 | 1 | 1 | 230  | 8.44  |
| KOH52030.1 | ADP1p putative ATP-dependent permease of the ABC transporter family [ <i>Saccharomyces boulardii</i> ] | 117.2 | 55.53 | 2.00  | 2 | 2 | 2 | 2 | 1049 | 5.16  |
| KOH52292.1 | FES1p Hsp70 (Ssa1p) nucleotide exchange factor [ <i>Saccharomyces boulardii</i> ]                      | 32.6  | 55.47 | 5.52  | 2 | 2 | 2 | 2 | 290  | 5.06  |
| KQC41748.1 | Adenine phosphoribosyltransferase [ <i>Saccharomyces boulardii</i> ]                                   | 20.5  | 55.16 | 12.83 | 1 | 2 | 2 | 2 | 187  | 5.21  |
| KQC42956.1 | Peroxisomal acyl-CoA thioesterase [ <i>Saccharomyces boulardii</i> ]                                   | 40.2  | 54.98 | 7.16  | 1 | 2 | 2 | 2 | 349  | 8.79  |
| KQC41720.1 | Subunit of signal peptidase complex [ <i>Saccharomyces boulardii</i> ]                                 | 20.8  | 54.73 | 8.43  | 1 | 1 | 1 | 1 | 178  | 9.23  |
| KQC43276.1 | Acidic protein of the mitochondrial matrix [ <i>Saccharomyces boulardii</i> ]                          | 30.1  | 54.65 | 10.53 | 1 | 2 | 2 | 2 | 266  | 4.58  |
| KQC45659.1 | Component of the MICOS complex [ <i>Saccharomyces boulardii</i> ]                                      | 12.4  | 54.55 | 11.32 | 1 | 1 | 1 | 1 | 106  | 8.40  |
| KQC42097.1 | Splicing factor associated with the spliceosome [ <i>Saccharomyces boulardii</i> ]                     | 56.5  | 54.44 | 2.19  | 1 | 1 | 1 | 1 | 503  | 5.17  |
| KQC45840.1 | Rho GTPase activating protein (RhoGAP) [ <i>Saccharomyces boulardii</i> ]                              | 124.8 | 54.39 | 1.68  | 1 | 1 | 1 | 1 | 1128 | 6.84  |
| KQC44794.1 | putative lipid phosphatase of the endoplasmic reticulum [ <i>Saccharomyces boulardii</i> ]             | 57.1  | 54.37 | 1.63  | 1 | 1 | 1 | 2 | 491  | 9.44  |
| KQC44079.1 | Enzyme of the 'de novo' purine nucleotide biosynthetic pathway [ <i>Saccharomyces boulardii</i> ]      | 86.0  | 54.12 | 2.99  | 1 | 2 | 2 | 2 | 802  | 5.27  |
| KQC41017.1 | Nuclear actin-related protein involved in chromatin remodeling [ <i>Saccharomyces boulardii</i> ]      | 100.3 | 54.08 | 0.91  | 1 | 1 | 1 | 1 | 881  | 4.82  |
| KQC40964.1 | hypothetical protein AB282_04894 [ <i>Saccharomyces boulardii</i> ]                                    | 48.0  | 54.06 | 4.17  | 1 | 1 | 1 | 1 | 432  | 5.43  |
| KQC44667.1 | Peroxisomal membrane protein (PMP) [ <i>Saccharomyces boulardii</i> ]                                  | 50.7  | 53.92 | 1.81  | 1 | 1 | 1 | 1 | 441  | 6.35  |
| KQC43670.1 | Component of the MICOS complex [ <i>Saccharomyces boulardii</i> ]                                      | 26.9  | 53.89 | 6.44  | 1 | 1 | 1 | 1 | 233  | 9.26  |
| KQC42189.1 | Subunit of signal peptidase complex [ <i>Saccharomyces boulardii</i> ]                                 | 21.3  | 53.72 | 11.41 | 1 | 2 | 2 | 2 | 184  | 8.70  |

|            |                                                                                                           |       |       |       |   |   |   |   |      |      |
|------------|-----------------------------------------------------------------------------------------------------------|-------|-------|-------|---|---|---|---|------|------|
| KQC42598.1 | Class E protein of the vacuolar protein-sorting (Vps) pathway [ <i>Saccharomyces boulardii</i> ]          | 23.1  | 53.67 | 6.37  | 4 | 1 | 2 | 2 | 204  | 6.87 |
| KQC43300.1 | Intracellular sporulation-specific glucoamylase [ <i>Saccharomyces boulardii</i> ]                        | 61.4  | 53.53 | 3.46  | 1 | 2 | 2 | 2 | 549  | 5.07 |
| KQC43385.1 | Alpha subunit of the nascent polypeptide-associated complex (NAC) [ <i>Saccharomyces boulardii</i> ]      | 18.7  | 53.47 | 12.07 | 1 | 2 | 2 | 2 | 174  | 4.94 |
| KQC40623.1 | Dual specificity mitochondrial citrate and methylcitrate synthase [ <i>Saccharomyces boulardii</i> ]      | 53.8  | 53.38 | 4.12  | 2 | 2 | 2 | 2 | 486  | 8.59 |
| KQC42624.1 | hypothetical protein AB282_03052 [ <i>Saccharomyces boulardii</i> ]                                       | 31.5  | 53.34 | 6.18  | 1 | 1 | 1 | 1 | 275  | 9.29 |
| KQC41268.1 | Lumazine synthase (DMRL synthase) [ <i>Saccharomyces boulardii</i> ]                                      | 18.5  | 53.32 | 4.14  | 1 | 1 | 1 | 1 | 169  | 6.80 |
| KQC43989.1 | Mitochondrial ribosomal protein of the small subunit [ <i>Saccharomyces boulardii</i> ]                   | 50.8  | 52.92 | 4.44  | 1 | 2 | 2 | 2 | 450  | 9.73 |
| KQC41894.1 | hypothetical protein AB282_03958 [ <i>Saccharomyces boulardii</i> ]                                       | 55.8  | 52.89 | 5.32  | 1 | 2 | 2 | 2 | 489  | 7.84 |
| KQC40636.1 | Essential helicase component of heterohexameric MCM2-7 complex [ <i>Saccharomyces boulardii</i> ]         | 105.0 | 52.86 | 0.96  | 1 | 1 | 1 | 1 | 933  | 6.21 |
| KQC42291.1 | Methyltransferase for rRNA [ <i>Saccharomyces boulardii</i> ]                                             | 27.8  | 52.74 | 4.37  | 1 | 1 | 1 | 1 | 252  | 8.41 |
| KQC41032.1 | Ubiquitin-specific protease [ <i>Saccharomyces boulardii</i> ]                                            | 146.3 | 52.62 | 0.86  | 1 | 1 | 1 | 1 | 1272 | 5.21 |
| KQC44448.1 | GDP dissociation inhibitor [ <i>Saccharomyces boulardii</i> ]                                             | 51.2  | 52.45 | 7.32  | 1 | 2 | 2 | 2 | 451  | 5.99 |
| KOH52096.1 | CDC39p Component of the CCR4-NOT1 core complex [ <i>Saccharomyces boulardii</i> ]                         | 240.2 | 52.27 | 0.90  | 2 | 2 | 2 | 2 | 2108 | 6.44 |
| KQC41136.1 | Nuclear exosome exonuclease component [ <i>Saccharomyces boulardii</i> ]                                  | 84.0  | 52.25 | 1.77  | 1 | 1 | 1 | 1 | 733  | 7.14 |
| KQC42731.1 | Fe(II)/2-oxoglutarate-dependent dioxygenase family member [ <i>Saccharomyces boulardii</i> ]              | 35.3  | 52.02 | 5.11  | 1 | 2 | 2 | 2 | 313  | 7.99 |
| KQC40649.1 | Effector of Rab GTPase Sec4p [ <i>Saccharomyces boulardii</i> ]                                           | 114.4 | 51.97 | 1.84  | 1 | 1 | 1 | 2 | 1033 | 8.43 |
| KQC44810.1 | Essential Hsp90p co-chaperone [ <i>Saccharomyces boulardii</i> ]                                          | 58.3  | 51.86 | 3.56  | 1 | 1 | 1 | 1 | 506  | 5.06 |
| KQC44722.1 | Palmitoyl transferase involved in protein palmitoylation [ <i>Saccharomyces boulardii</i> ]               | 85.8  | 51.84 | 1.18  | 1 | 1 | 1 | 1 | 764  | 5.72 |
| KQC40462.1 | Mitochondrial ribosomal protein of the large subunit [ <i>Saccharomyces boulardii</i> ]                   | 33.7  | 51.84 | 6.40  | 1 | 2 | 2 | 2 | 297  | 9.45 |
| KQC43203.1 | hypothetical protein AB282_01474 [ <i>Saccharomyces boulardii</i> ]                                       | 158.2 | 51.83 | 1.37  | 2 | 2 | 2 | 2 | 1461 | 5.26 |
| KQC44164.1 | Subunit of the multiprotein cohesin complex [ <i>Saccharomyces boulardii</i> ]                            | 141.1 | 51.55 | 1.39  | 1 | 1 | 1 | 1 | 1225 | 6.33 |
| KQC43641.1 | GTP-cyclohydrolase I [ <i>Saccharomyces boulardii</i> ]                                                   | 27.8  | 51.52 | 8.64  | 1 | 2 | 2 | 2 | 243  | 7.23 |
| KQC42122.1 | Nucleolar DEAD-box protein required for ribosome assembly and function [ <i>Saccharomyces boulardii</i> ] | 85.0  | 51.48 | 1.59  | 1 | 1 | 1 | 1 | 754  | 5.54 |
| KQC41178.1 | PAS-domain containing serine/threonine protein kinase [ <i>Saccharomyces boulardii</i> ]                  | 109.0 | 51.34 | 1.04  | 4 | 1 | 1 | 1 | 960  | 5.54 |
| KOH49814.1 | MPP10p Component of the SSU processome and 90S preribosome [ <i>Saccharomyces boulardii</i> ]             | 66.9  | 51.31 | 4.38  | 2 | 2 | 2 | 2 | 593  | 4.68 |
| KQC42706.1 | Essential protein, constituent of 66S pre-ribosomal particle [ <i>Saccharomyces boulardii</i> ]           | 50.5  | 51.14 | 5.53  | 1 | 2 | 2 | 2 | 434  | 9.57 |
| KQC41804.1 | Transcriptional coactivator [ <i>Saccharomyces boulardii</i> ]                                            | 33.1  | 51.04 | 7.88  | 1 | 2 | 2 | 2 | 292  | 5.63 |
| KQC43522.1 | Divalent metal ion transporter involved in manganese homeostasis [ <i>Saccharomyces boulardii</i> ]       | 59.7  | 51.03 | 1.82  | 1 | 1 | 1 | 1 | 549  | 5.71 |
| KQC45054.1 | UDP-N-acetylglucosamine pyrophosphorylase [ <i>Saccharomyces boulardii</i> ]                              | 53.4  | 50.96 | 3.35  | 2 | 1 | 2 | 2 | 477  | 7.42 |

|            |                                                                                                          |       |       |       |   |   |   |   |      |      |
|------------|----------------------------------------------------------------------------------------------------------|-------|-------|-------|---|---|---|---|------|------|
| KQC41248.1 | Divalent metal ion transporter [ <i>Saccharomyces boulardii</i> ]                                        | 63.1  | 50.89 | 3.65  | 1 | 1 | 1 | 2 | 575  | 6.73 |
| KQC44427.1 | hypothetical protein AB282_01683 [ <i>Saccharomyces boulardii</i> ]                                      | 81.5  | 50.88 | 1.42  | 1 | 1 | 1 | 1 | 706  | 7.43 |
| KQC41275.1 | hypothetical protein AB282_04717 [ <i>Saccharomyces boulardii</i> ]                                      | 38.1  | 50.73 | 2.05  | 1 | 1 | 1 | 1 | 342  | 6.00 |
| KQC42607.1 | putative ATP-dependent RNA helicase of the DEAD-box family [ <i>Saccharomyces boulardii</i> ]            | 83.3  | 50.68 | 2.02  | 1 | 1 | 1 | 1 | 742  | 9.28 |
| KQC40443.1 | Delta adaptin-like subunit of the clathrin associated protein complex [ <i>Saccharomyces boulardii</i> ] | 106.8 | 50.65 | 1.61  | 1 | 1 | 1 | 1 | 932  | 5.08 |
| KQC42918.1 | Subunit of the cytosolic chaperonin Cct ring complex [ <i>Saccharomyces boulardii</i> ]                  | 61.9  | 50.59 | 5.34  | 1 | 3 | 3 | 3 | 562  | 5.53 |
| KQC43699.1 | Cholinephosphate cytidyltransferase [ <i>Saccharomyces boulardii</i> ]                                   | 49.3  | 50.57 | 4.48  | 1 | 2 | 2 | 2 | 424  | 8.57 |
| KQC42428.1 | ORM2p that mediates sphingolipid homeostasis [ <i>Saccharomyces boulardii</i> ]                          | 24.8  | 50.50 | 8.33  | 2 | 2 | 2 | 2 | 216  | 8.40 |
| KQC44644.1 | Anthranilate phosphoribosyl transferase [ <i>Saccharomyces boulardii</i> ]                               | 41.3  | 50.47 | 3.16  | 1 | 1 | 1 | 2 | 380  | 6.67 |
| KQC42879.1 | Adenosine kinase [ <i>Saccharomyces boulardii</i> ]                                                      | 36.3  | 50.43 | 4.12  | 1 | 1 | 1 | 1 | 340  | 5.16 |
| KQC40447.1 | RNA-binding protein, subunit of Nrd1 complex (Nrd1p-Nab3p-Sen1p) [ <i>Saccharomyces boulardii</i> ]      | 90.6  | 50.37 | 3.11  | 1 | 2 | 2 | 2 | 804  | 4.51 |
| KQC44651.1 | Mitochondrial ribosomal protein of the small subunit [ <i>Saccharomyces boulardii</i> ]                  | 36.7  | 50.15 | 4.36  | 1 | 1 | 1 | 1 | 321  | 9.06 |
| KQC40687.1 | Glycine-tRNA synthetase [ <i>Saccharomyces boulardii</i> ]                                               | 71.0  | 50.05 | 2.27  | 1 | 1 | 1 | 1 | 618  | 7.52 |
| KQC42133.1 | Subunit of the core form of RNA polymerase transcription factor TFIIF [ <i>Saccharomyces boulardii</i> ] | 52.3  | 50.00 | 6.29  | 1 | 2 | 2 | 2 | 461  | 7.80 |
| KQC41152.1 | Calmodulin-dependent protein kinase [ <i>Saccharomyces boulardii</i> ]                                   | 50.4  | 49.97 | 2.46  | 1 | 1 | 1 | 1 | 447  | 6.04 |
| KQC42233.1 | Mitogen-activated protein kinase involved in osmoregulation [ <i>Saccharomyces boulardii</i> ]           | 48.9  | 49.81 | 2.76  | 1 | 1 | 1 | 1 | 435  | 5.55 |
| KQC40494.1 | Component of both the Rpd3S and Rpd3L histone deacetylase complex [ <i>Saccharomyces boulardii</i> ]     | 51.0  | 49.72 | 5.65  | 1 | 2 | 2 | 2 | 460  | 5.25 |
| KQC42215.1 | v-SNARE component of the vacuolar SNARE complex [ <i>Saccharomyces boulardii</i> ]                       | 28.9  | 49.63 | 2.77  | 1 | 1 | 1 | 1 | 253  | 5.66 |
| KOH51396.1 | PMT1p Protein O-mannosyltransferase of the ER membrane [ <i>Saccharomyces boulardii</i> ]                | 92.6  | 49.46 | 1.35  | 2 | 1 | 1 | 1 | 817  | 6.68 |
| KQC40655.1 | Flavin-linked sulfhydryl oxidase localized to the ER lumen [ <i>Saccharomyces boulardii</i> ]            | 22.1  | 49.27 | 6.63  | 1 | 1 | 1 | 1 | 196  | 7.43 |
| KOH52362.1 | CHS3p Chitin synthase III [ <i>Saccharomyces boulardii</i> ]                                             | 131.5 | 49.16 | 2.32  | 3 | 2 | 2 | 2 | 1165 | 6.71 |
| KQC42253.1 | Choline kinase [ <i>Saccharomyces boulardii</i> ]                                                        | 66.3  | 49.07 | 1.89  | 1 | 1 | 1 | 1 | 582  | 5.58 |
| KQC43083.1 | Subunit of tRNA (1-methyladenosine) methyltransferase with Gcd14p [ <i>Saccharomyces boulardii</i> ]     | 43.9  | 49.04 | 2.87  | 1 | 1 | 1 | 1 | 383  | 7.59 |
| KQC44049.1 | YIP4p that interacts with Rab GTPase [ <i>Saccharomyces boulardii</i> ]                                  | 26.0  | 48.89 | 5.11  | 1 | 1 | 1 | 1 | 235  | 7.01 |
| KQC43271.1 | FIS1p involved in mitochondrial fission and peroxisome abundance [ <i>Saccharomyces boulardii</i> ]      | 17.7  | 48.86 | 11.61 | 1 | 2 | 2 | 2 | 155  | 9.10 |
| KQC44414.1 | 5-phospho-ribosyl-1(alpha)-pyrophosphate synthetase, synthesizes PRPP [ <i>Saccharomyces boulardii</i> ] | 34.7  | 48.68 | 2.83  | 2 | 1 | 1 | 1 | 318  | 6.46 |
| KQC41324.1 | MAP kinase kinase kinase of HOG1 mitogen-activated signaling pathway [ <i>Saccharomyces boulardii</i> ]  | 180.3 | 48.63 | 0.89  | 1 | 1 | 1 | 1 | 1579 | 5.78 |
| KQC45444.1 | 2-enoyl thioester reductase [ <i>Saccharomyces boulardii</i> ]                                           | 42.0  | 48.34 | 2.63  | 1 | 1 | 1 | 1 | 380  | 9.00 |
| KQC43694.1 | Mitochondrial protein that interacts with frataxin (Yfh1p) [ <i>Saccharomyces boulardii</i> ]            | 28.7  | 48.20 | 8.43  | 1 | 2 | 2 | 2 | 261  | 8.44 |

|            |                                                                                                         |       |       |       |    |   |   |   |      |       |
|------------|---------------------------------------------------------------------------------------------------------|-------|-------|-------|----|---|---|---|------|-------|
| KQC44570.1 | Transmembrane protein [ <i>Saccharomyces boulardii</i> ]                                                | 60.8  | 48.08 | 2.25  | 1  | 1 | 1 | 1 | 534  | 4.79  |
| KQC42119.1 | SOF1p required for biogenesis of 40S (small) ribosomal subunit [ <i>Saccharomyces boulardii</i> ]       | 56.8  | 48.07 | 3.27  | 1  | 1 | 1 | 1 | 489  | 9.41  |
| KQC44826.1 | NUM1p required for nuclear migration [ <i>Saccharomyces boulardii</i> ]                                 | 290.6 | 47.89 | 5.02  | 1  | 1 | 1 | 1 | 2549 | 5.35  |
| KQC41333.1 | hypothetical protein AB282_04194 [ <i>Saccharomyces boulardii</i> ]                                     | 47.1  | 47.84 | 5.45  | 1  | 2 | 2 | 2 | 404  | 9.39  |
| KQC45016.1 | TSR1p required for processing of 20S pre-rRNA in the cytoplasm [ <i>Saccharomyces boulardii</i> ]       | 90.8  | 47.80 | 4.06  | 4  | 2 | 3 | 3 | 788  | 5.69  |
| KQC42946.1 | RAD26p involved in transcription-coupled nucleotide excision repair [ <i>Saccharomyces boulardii</i> ]  | 124.5 | 47.78 | 1.38  | 2  | 1 | 2 | 2 | 1085 | 7.47  |
| KQC43249.1 | hypothetical protein AB282_01325 [ <i>Saccharomyces boulardii</i> ]                                     | 54.9  | 47.70 | 3.38  | 1  | 2 | 2 | 2 | 473  | 5.73  |
| KQC44337.1 | Phosphatidylserine synthase [ <i>Saccharomyces boulardii</i> ]                                          | 30.9  | 47.69 | 7.97  | 1  | 1 | 1 | 1 | 276  | 6.27  |
| KQC40974.1 | hypothetical protein AB282_04904 [ <i>Saccharomyces boulardii</i> ]                                     | 129.6 | 47.64 | 2.03  | 1  | 1 | 2 | 2 | 1134 | 9.10  |
| KQC41531.1 | Essential serine kinase involved in the processing of 20S pre-rRNA [ <i>Saccharomyces boulardii</i> ]   | 49.1  | 47.58 | 2.35  | 1  | 1 | 1 | 1 | 425  | 5.29  |
| KQC44855.1 | hypothetical protein AB282_00916 [ <i>Saccharomyces boulardii</i> ]                                     | 88.7  | 47.39 | 2.89  | 1  | 2 | 2 | 2 | 796  | 9.20  |
| KQC42192.1 | Mitochondrial elongation factor involved in translational elongation [ <i>Saccharomyces boulardii</i> ] | 84.6  | 47.38 | 2.63  | 1  | 1 | 2 | 2 | 761  | 6.86  |
| KQC41532.1 | hypothetical protein AB282_04393 [ <i>Saccharomyces boulardii</i> ]                                     | 20.8  | 47.34 | 11.11 | 1  | 1 | 1 | 1 | 207  | 7.64  |
| KQC42309.1 | ER membrane protein that plays a central role in ERAD [ <i>Saccharomyces boulardii</i> ]                | 94.1  | 47.26 | 1.34  | 1  | 1 | 1 | 1 | 820  | 6.51  |
| KQC40893.1 | putative serine hydrolase [ <i>Saccharomyces boulardii</i> ]                                            | 30.4  | 47.14 | 4.14  | 1  | 1 | 1 | 1 | 266  | 6.32  |
| KQC42349.1 | Zinc finger transcription factor [ <i>Saccharomyces boulardii</i> ]                                     | 164.1 | 47.04 | 0.88  | 1  | 1 | 2 | 2 | 1483 | 7.44  |
| KQC40637.1 | Subunit g of the mitochondrial F1F0 ATP synthase [ <i>Saccharomyces boulardii</i> ]                     | 12.9  | 46.96 | 16.52 | 1  | 2 | 2 | 2 | 115  | 9.82  |
| KQC45552.1 | Mitochondrial ribosomal protein of the small subunit [ <i>Saccharomyces boulardii</i> ]                 | 31.9  | 46.95 | 7.91  | 1  | 1 | 1 | 1 | 278  | 10.29 |
| KQC43376.1 | hypothetical protein AB282_02372 [ <i>Saccharomyces boulardii</i> ]                                     | 69.0  | 46.91 | 1.99  | 1  | 1 | 1 | 1 | 602  | 6.23  |
| KQC45845.1 | Non-essential INO80 chromatin remodeling complex subunit [ <i>Saccharomyces boulardii</i> ]             | 22.6  | 46.84 | 8.25  | 2  | 1 | 1 | 1 | 194  | 5.45  |
| KQC41249.1 | Component of the cleavage and polyadenylation factor I (CF I) [ <i>Saccharomyces boulardii</i> ]        | 59.7  | 46.70 | 2.81  | 1  | 1 | 1 | 1 | 534  | 5.66  |
| KQC41829.1 | Mitochondrial DNA-binding protein [ <i>Saccharomyces boulardii</i> ]                                    | 21.5  | 46.67 | 6.56  | 1  | 1 | 1 | 1 | 183  | 9.69  |
| KQC42569.1 | Mitochondrial cytochrome-c peroxidase [ <i>Saccharomyces boulardii</i> ]                                | 40.4  | 46.57 | 6.63  | 1  | 2 | 2 | 2 | 362  | 6.64  |
| KQC44446.1 | Type 1 serine/threonine protein phosphatase catalytic subunit [ <i>Saccharomyces boulardii</i> ]        | 35.9  | 46.50 | 4.49  | 3  | 1 | 2 | 2 | 312  | 5.49  |
| KQC41325.1 | Alpha-1,6-mannosyltransferase localized to the ER [ <i>Saccharomyces boulardii</i> ]                    | 62.6  | 46.15 | 1.45  | 1  | 1 | 1 | 1 | 551  | 7.09  |
| KQC42194.1 | Subunit of the RNA polymerase II mediator complex [ <i>Saccharomyces boulardii</i> ]                    | 122.4 | 46.06 | 1.12  | 1  | 1 | 1 | 1 | 1073 | 8.81  |
| KQC44432.1 | Vacuolar aspartate and glutamate exporter [ <i>Saccharomyces boulardii</i> ]                            | 48.8  | 45.93 | 4.24  | 1  | 1 | 1 | 1 | 448  | 8.66  |
| KQC42440.1 | Signal transducing MEK kinase [ <i>Saccharomyces boulardii</i> ]                                        | 83.1  | 45.90 | 1.49  | 1  | 1 | 1 | 1 | 738  | 7.23  |
| KQC45446.1 | Phosphatidate cytidyltransferase (CDP-diglyceride synthetase) [ <i>Saccharomyces boulardii</i> ]        | 51.8  | 45.88 | 3.28  | 1  | 1 | 2 | 2 | 457  | 8.57  |
| KOH49753.1 | SMC3p Subunit of the multiprotein cohesin complex [ <i>Saccharomyces boulardii</i> ]                    | 48.3  | 45.84 | 3.85  | 10 | 1 | 2 | 2 | 416  | 8.59  |

|            |                                                                                                           |       |       |      |   |   |   |   |      |      |
|------------|-----------------------------------------------------------------------------------------------------------|-------|-------|------|---|---|---|---|------|------|
| KQC41359.1 | LST8p required for the transport of Gap1p [ <i>Saccharomyces boulardii</i> ]                              | 34.0  | 45.81 | 3.63 | 1 | 1 | 1 | 1 | 303  | 6.52 |
| KQC45213.1 | SOL2p with a possible role in tRNA export [ <i>Saccharomyces boulardii</i> ]                              | 34.5  | 45.78 | 9.84 | 1 | 1 | 2 | 2 | 315  | 6.70 |
| KQC42337.1 | Calcium permeable gated cation channel [ <i>Saccharomyces boulardii</i> ]                                 | 89.3  | 45.76 | 1.15 | 1 | 1 | 1 | 1 | 782  | 8.12 |
| KQC42435.1 | Component of the RSC chromatin remodeling complex [ <i>Saccharomyces boulardii</i> ]                      | 102.2 | 45.68 | 2.92 | 1 | 2 | 2 | 2 | 889  | 8.91 |
| KQC42818.1 | Member of the REF (RNA and export factor binding protein) family [ <i>Saccharomyces boulardii</i> ]       | 23.8  | 45.60 | 9.85 | 1 | 2 | 2 | 2 | 203  | 9.41 |
| KQC44602.1 | Subunit of U3-containing Small Subunit (SSU) processome complex [ <i>Saccharomyces boulardii</i> ]        | 71.9  | 45.56 | 1.71 | 1 | 1 | 1 | 1 | 643  | 4.94 |
| KOH49752.1 | SMC3p Subunit of the multiprotein cohesin complex [ <i>Saccharomyces boulardii</i> ]                      | 82.0  | 45.53 | 3.47 | 2 | 1 | 1 | 1 | 720  | 5.80 |
| KQC43437.1 | hypothetical protein AB282_02433 [ <i>Saccharomyces boulardii</i> ]                                       | 34.2  | 45.49 | 6.44 | 1 | 1 | 1 | 3 | 326  | 5.41 |
| KQC43735.1 | hypothetical protein AB282_01991 [ <i>Saccharomyces boulardii</i> ]                                       | 29.2  | 45.47 | 3.80 | 1 | 1 | 1 | 1 | 263  | 9.98 |
| KQC43534.1 | hypothetical protein AB282_02530 [ <i>Saccharomyces boulardii</i> ]                                       | 71.3  | 45.31 | 1.55 | 1 | 1 | 1 | 1 | 644  | 7.69 |
| KQC41320.1 | SOL1p with a possible role in tRNA export [ <i>Saccharomyces boulardii</i> ]                              | 35.6  | 45.28 | 7.17 | 1 | 1 | 2 | 2 | 321  | 7.55 |
| KQC43743.1 | Nuclear 5' to 3' single-stranded RNA exonuclease [ <i>Saccharomyces boulardii</i> ]                       | 30.4  | 45.27 | 3.31 | 1 | 1 | 1 | 1 | 272  | 9.17 |
| KQC40645.1 | Membrane protein that interacts with Yip1p to mediate membrane traffic [ <i>Saccharomyces boulardii</i> ] | 22.8  | 45.19 | 3.96 | 1 | 1 | 1 | 1 | 202  | 9.03 |
| KQC43046.1 | Alpha arrestin [ <i>Saccharomyces boulardii</i> ]                                                         | 114.8 | 45.07 | 1.17 | 2 | 1 | 1 | 1 | 1023 | 7.15 |
| KQC45151.1 | NHP2p [ <i>Saccharomyces boulardii</i> ]                                                                  | 17.1  | 45.05 | 5.13 | 1 | 1 | 1 | 1 | 156  | 9.72 |
| KQC45729.1 | Vesicle membrane receptor protein (v-SNARE) [ <i>Saccharomyces boulardii</i> ]                            | 14.0  | 45.03 | 9.68 | 1 | 1 | 1 | 1 | 124  | 8.18 |
| KQC43471.1 | Aldose reductase [ <i>Saccharomyces boulardii</i> ]                                                       | 37.1  | 45.02 | 4.89 | 1 | 2 | 2 | 2 | 327  | 7.08 |
| KQC41712.1 | Subunit of the THO complex [ <i>Saccharomyces boulardii</i> ]                                             | 45.0  | 44.85 | 3.06 | 4 | 1 | 2 | 2 | 392  | 4.54 |
| KQC44947.1 | FAF1p required for pre-rRNA processing [ <i>Saccharomyces boulardii</i> ]                                 | 45.2  | 44.83 | 2.76 | 1 | 1 | 1 | 1 | 399  | 9.00 |
| KQC41001.1 | Beta 2 subunit of the 20S proteasome [ <i>Saccharomyces boulardii</i> ]                                   | 28.2  | 44.73 | 8.05 | 1 | 2 | 2 | 2 | 261  | 6.79 |
| KQC43883.1 | Component of the conserved oligomeric Golgi complex [ <i>Saccharomyces boulardii</i> ]                    | 31.8  | 44.56 | 6.09 | 1 | 1 | 1 | 1 | 279  | 4.68 |
| KQC44271.1 | Soluble fumarate reductase [ <i>Saccharomyces boulardii</i> ]                                             | 67.7  | 44.08 | 1.62 | 1 | 1 | 1 | 1 | 618  | 5.44 |
| KQC41610.1 | MON2p with a role in endocytosis and vacuole integrity [ <i>Saccharomyces boulardii</i> ]                 | 186.7 | 44.02 | 0.98 | 1 | 1 | 2 | 2 | 1636 | 5.73 |
| KOH52340.1 | REB1p RNA polymerase I enhancer binding protein [ <i>Saccharomyces boulardii</i> ]                        | 91.8  | 43.96 | 2.35 | 2 | 2 | 2 | 2 | 810  | 5.16 |
| KQC43113.1 | Mannose-containing glycoprotein constituent of the cell wall [ <i>Saccharomyces boulardii</i> ]           | 23.0  | 43.65 | 3.56 | 5 | 1 | 1 | 1 | 225  | 4.68 |
| KQC40780.1 | Ski complex component and TPR protein [ <i>Saccharomyces boulardii</i> ]                                  | 163.7 | 43.59 | 1.12 | 1 | 1 | 1 | 1 | 1432 | 5.38 |
| KOH50127.1 | PR11p Subunit of DNA primase [ <i>Saccharomyces boulardii</i> ]                                           | 24.1  | 43.52 | 5.39 | 2 | 1 | 1 | 1 | 204  | 9.22 |
| KQC45425.1 | Succinate semialdehyde dehydrogenase [ <i>Saccharomyces boulardii</i> ]                                   | 54.2  | 43.47 | 3.82 | 1 | 1 | 1 | 1 | 497  | 6.65 |
| KQC43004.1 | Microtubule-associated protein involved in microtubule organization [ <i>Saccharomyces boulardii</i> ]    | 194.5 | 43.44 | 1.17 | 2 | 2 | 2 | 2 | 1796 | 5.94 |
| KQC45290.1 | Essential protein involved in rRNA processing and ribosome biogenesis [ <i>Saccharomyces boulardii</i> ]  | 34.4  | 43.20 | 3.03 | 1 | 1 | 1 | 1 | 297  | 8.87 |

|            |                                                                                                       |       |       |       |   |   |   |   |      |       |
|------------|-------------------------------------------------------------------------------------------------------|-------|-------|-------|---|---|---|---|------|-------|
| KQC42278.1 | Mitochondrial intermembrane space protein [ <i>Saccharomyces boulardii</i> ]                          | 42.2  | 43.11 | 2.45  | 1 | 1 | 1 | 1 | 367  | 7.93  |
| KQC45229.1 | Component of the RSC chromatin remodeling complex [ <i>Saccharomyces boulardii</i> ]                  | 54.2  | 42.97 | 4.14  | 1 | 1 | 1 | 2 | 483  | 4.86  |
| KQC41058.1 | Glucose-repressible ADP-ribosylation factor [ <i>Saccharomyces boulardii</i> ]                        | 20.7  | 42.96 | 5.46  | 1 | 1 | 1 | 1 | 183  | 9.41  |
| KQC40896.1 | Phosphoprotein of the mRNA cap-binding complex [ <i>Saccharomyces boulardii</i> ]                     | 18.2  | 42.81 | 8.70  | 1 | 1 | 1 | 1 | 161  | 5.96  |
| KQC41526.1 | epimerase [ <i>Saccharomyces boulardii</i> ]                                                          | 27.5  | 42.37 | 6.50  | 1 | 1 | 1 | 1 | 246  | 8.29  |
| KQC43312.1 | Histidinol-phosphate aminotransferase [ <i>Saccharomyces boulardii</i> ]                              | 42.6  | 42.20 | 3.64  | 1 | 1 | 1 | 1 | 385  | 6.43  |
| KQC44576.1 | Sorting nexin [ <i>Saccharomyces boulardii</i> ]                                                      | 70.7  | 42.06 | 5.28  | 1 | 2 | 2 | 2 | 625  | 6.83  |
| KQC41702.1 | Component of the conserved oligomeric Golgi complex [ <i>Saccharomyces boulardii</i> ]                | 31.1  | 41.94 | 5.22  | 2 | 1 | 1 | 1 | 268  | 4.70  |
| KQC43129.1 | Subunit of the SWI/SNF chromatin remodeling complex [ <i>Saccharomyces boulardii</i> ]                | 92.9  | 41.83 | 1.09  | 1 | 1 | 1 | 1 | 825  | 4.86  |
| KQC40419.1 | hypothetical protein AB282_05053 [ <i>Saccharomyces boulardii</i> ]                                   | 78.3  | 41.79 | 2.33  | 1 | 1 | 1 | 1 | 688  | 5.44  |
| KQC43577.1 | Ceramide synthase component [ <i>Saccharomyces boulardii</i> ]                                        | 48.4  | 41.69 | 4.87  | 1 | 1 | 1 | 1 | 411  | 8.79  |
| KQC45150.1 | Cytoplasmic nucleoporin required for polyadenylated mRNA export [ <i>Saccharomyces boulardii</i> ]    | 62.1  | 41.65 | 2.04  | 1 | 1 | 1 | 1 | 538  | 8.92  |
| KQC41947.1 | VTI1p involved in cis-Golgi membrane traffic [ <i>Saccharomyces boulardii</i> ]                       | 24.7  | 41.50 | 6.45  | 1 | 1 | 1 | 1 | 217  | 6.62  |
| KQC44522.1 | 3,4-dihydroxy-2-butanone-4-phosphate synthase (DHBP synthase) [ <i>Saccharomyces boulardii</i> ]      | 22.6  | 40.87 | 3.37  | 1 | 1 | 1 | 1 | 208  | 5.78  |
| KQC43625.1 | Constituent of 66S pre-ribosomal particle [ <i>Saccharomyces boulardii</i> ]                          | 35.0  | 40.66 | 3.87  | 1 | 1 | 1 | 1 | 310  | 9.63  |
| KQC43000.1 | Sorting nexin [ <i>Saccharomyces boulardii</i> ]                                                      | 49.0  | 40.56 | 2.60  | 1 | 1 | 1 | 1 | 423  | 6.49  |
| KQC44301.1 | Phosphorylated and palmitoylated vacuolar membrane protein [ <i>Saccharomyces boulardii</i> ]         | 63.2  | 40.54 | 4.15  | 1 | 1 | 2 | 2 | 578  | 5.14  |
| KQC42807.1 | putative positive regulator of mannosylphosphate transferase Mnn6p [ <i>Saccharomyces boulardii</i> ] | 138.5 | 40.51 | 1.71  | 1 | 2 | 2 | 2 | 1171 | 6.61  |
| KQC40978.1 | 3-phosphoserine aminotransferase [ <i>Saccharomyces boulardii</i> ]                                   | 43.4  | 40.43 | 5.06  | 1 | 1 | 1 | 1 | 395  | 6.54  |
| KQC44758.1 | Histone H2A [ <i>Saccharomyces boulardii</i> ]                                                        | 14.0  | 40.37 | 6.82  | 2 | 1 | 1 | 1 | 132  | 10.67 |
| KQC40926.1 | Pseudouridine synthase [ <i>Saccharomyces boulardii</i> ]                                             | 77.0  | 40.31 | 3.40  | 1 | 1 | 1 | 1 | 676  | 7.80  |
| KQC44179.1 | Small subunit of the heterodimeric cap binding complex with Sto1p [ <i>Saccharomyces boulardii</i> ]  | 93.3  | 40.30 | 1.37  | 2 | 1 | 1 | 1 | 802  | 8.95  |
| KQC45166.1 | Component of the septin ring that is required for cytokinesis [ <i>Saccharomyces boulardii</i> ]      | 62.6  | 40.25 | 4.72  | 1 | 2 | 2 | 2 | 551  | 5.53  |
| KQC40744.1 | Repressor of translation initiation [ <i>Saccharomyces boulardii</i> ]                                | 39.2  | 40.13 | 4.58  | 1 | 1 | 1 | 1 | 349  | 8.43  |
| KQC42301.1 | PWP1p with WD-40 repeats involved in rRNA processing [ <i>Saccharomyces boulardii</i> ]               | 63.8  | 40.06 | 2.26  | 1 | 1 | 1 | 1 | 576  | 4.60  |
| KQC44991.1 | U1 snRNP protein involved in splicing [ <i>Saccharomyces boulardii</i> ]                              | 63.0  | 39.92 | 1.89  | 1 | 1 | 1 | 1 | 530  | 6.57  |
| KQC40416.1 | hypothetical protein AB282_05050 [ <i>Saccharomyces boulardii</i> ]                                   | 17.4  | 39.86 | 15.75 | 1 | 2 | 2 | 2 | 146  | 5.30  |
| KQC43927.1 | SDS23p involved in cell separation during budding [ <i>Saccharomyces boulardii</i> ]                  | 56.7  | 39.86 | 2.33  | 1 | 1 | 1 | 1 | 515  | 9.04  |
| KQC44698.1 | MHR1p [ <i>Saccharomyces boulardii</i> ]                                                              | 26.9  | 39.75 | 6.19  | 1 | 1 | 1 | 1 | 226  | 9.50  |
| KQC44519.1 | Serine/threonine protein kinase [ <i>Saccharomyces boulardii</i> ]                                    | 86.1  | 39.74 | 1.44  | 1 | 1 | 1 | 1 | 766  | 9.23  |



|            |                                                                                                          |       |       |       |   |   |   |   |      |       |
|------------|----------------------------------------------------------------------------------------------------------|-------|-------|-------|---|---|---|---|------|-------|
| KQC45063.1 | Exosome non-catalytic core component [ <i>Saccharomyces boulardii</i> ]                                  | 29.0  | 39.61 | 5.28  | 1 | 1 | 1 | 1 | 265  | 5.33  |
| KQC41964.1 | SCJ1p [ <i>Saccharomyces boulardii</i> ]                                                                 | 41.5  | 39.60 | 4.24  | 1 | 1 | 1 | 1 | 377  | 7.43  |
| KQC43889.1 | C-24(28) sterol reductase [ <i>Saccharomyces boulardii</i> ]                                             | 56.0  | 39.48 | 3.81  | 1 | 2 | 2 | 2 | 473  | 8.60  |
| KQC42306.1 | Specific translational activator for the mitochondrial COX1 mRNA [ <i>Saccharomyces boulardii</i> ]      | 50.8  | 39.40 | 2.06  | 1 | 1 | 1 | 1 | 436  | 8.73  |
| KQC41335.1 | Acyl-CoA:sterol acyltransferase [ <i>Saccharomyces boulardii</i> ]                                       | 74.0  | 39.27 | 2.65  | 1 | 2 | 2 | 2 | 642  | 7.72  |
| KQC41358.1 | Mitochondrial ribosomal protein of the large subunit [ <i>Saccharomyces boulardii</i> ]                  | 43.2  | 39.16 | 3.50  | 1 | 1 | 1 | 1 | 371  | 9.82  |
| KQC40876.1 | hypothetical protein AB282_04806 [ <i>Saccharomyces boulardii</i> ]                                      | 57.2  | 39.13 | 2.51  | 4 | 1 | 2 | 2 | 479  | 9.17  |
| KQC42716.1 | Monoglyceride lipase (MGL) [ <i>Saccharomyces boulardii</i> ]                                            | 35.5  | 39.08 | 5.43  | 1 | 1 | 1 | 1 | 313  | 7.87  |
| KQC43878.1 | hypothetical protein AB282_02134 [ <i>Saccharomyces boulardii</i> ]                                      | 28.3  | 39.04 | 6.10  | 1 | 1 | 1 | 1 | 246  | 4.88  |
| KQC42553.1 | Subunit of Nup84p subcomplex of nuclear pore complex (NPC) [ <i>Saccharomyces boulardii</i> ]            | 133.2 | 38.57 | 0.86  | 1 | 1 | 1 | 1 | 1157 | 5.11  |
| KQC43656.1 | hypothetical protein AB282_01912 [ <i>Saccharomyces boulardii</i> ]                                      | 89.5  | 38.52 | 2.18  | 1 | 2 | 2 | 2 | 781  | 5.40  |
| KQC45230.1 | hypothetical protein AB282_00502 [ <i>Saccharomyces boulardii</i> ]                                      | 24.7  | 38.45 | 4.05  | 1 | 1 | 1 | 1 | 222  | 4.63  |
| KQC40515.1 | Isopentenyl diphosphate:dimethylallyl diphosphate isomerase [ <i>Saccharomyces boulardii</i> ]           | 33.3  | 38.44 | 10.42 | 3 | 2 | 2 | 2 | 288  | 4.98  |
| KQC44360.1 | Cysteine desulfurase (Nfs1p) activator [ <i>Saccharomyces boulardii</i> ]                                | 11.2  | 38.25 | 8.51  | 1 | 1 | 1 | 1 | 94   | 10.27 |
| KQC40884.1 | ATPase component of the RSC chromatin remodeling complex [ <i>Saccharomyces boulardii</i> ]              | 194.3 | 38.01 | 0.70  | 1 | 1 | 2 | 2 | 1706 | 6.93  |
| KQC43731.1 | Mitochondrial ribosomal protein of the small subunit [ <i>Saccharomyces boulardii</i> ]                  | 39.6  | 37.96 | 3.77  | 1 | 1 | 1 | 1 | 345  | 9.88  |
| KQC44340.1 | Core Sm protein Sm B [ <i>Saccharomyces boulardii</i> ]                                                  | 22.4  | 37.92 | 12.76 | 1 | 2 | 2 | 2 | 196  | 10.36 |
| KQC45313.1 | Conserved component of the MICOS complex [ <i>Saccharomyces boulardii</i> ]                              | 10.4  | 37.91 | 10.31 | 1 | 1 | 1 | 1 | 97   | 10.20 |
| KQC44141.1 | Cytoplasmic protein that inhibits Gdb1p glycogen debranching activity [ <i>Saccharomyces boulardii</i> ] | 21.8  | 37.73 | 7.69  | 1 | 2 | 2 | 2 | 195  | 7.18  |
| KQC40678.1 | Spermidine synthase [ <i>Saccharomyces boulardii</i> ]                                                   | 33.3  | 37.72 | 7.17  | 1 | 2 | 2 | 2 | 293  | 5.53  |
| KQC42507.1 | Mitochondrial ribosomal protein of the large subunit [ <i>Saccharomyces boulardii</i> ]                  | 36.9  | 37.70 | 4.08  | 1 | 1 | 1 | 1 | 319  | 8.25  |
| KQC45394.1 | Lsm (Like Sm) protein [ <i>Saccharomyces boulardii</i> ]                                                 | 11.2  | 37.55 | 13.68 | 1 | 1 | 1 | 1 | 95   | 8.13  |
| KQC40395.1 | hypothetical protein AB282_05029 [ <i>Saccharomyces boulardii</i> ]                                      | 57.3  | 37.49 | 2.49  | 1 | 1 | 1 | 2 | 523  | 5.81  |
| KQC43145.1 | Elongase I, medium-chain acyl elongase [ <i>Saccharomyces boulardii</i> ]                                | 36.3  | 37.48 | 5.48  | 1 | 2 | 2 | 2 | 310  | 9.39  |
| KQC40378.1 | Essential 18S rRNA dimethylase (dimethyladenosine transferase) [ <i>Saccharomyces boulardii</i> ]        | 35.9  | 37.42 | 3.14  | 1 | 1 | 1 | 1 | 318  | 9.55  |
| KQC43573.1 | ubiquinol--cytochrome-c reductase subunit 10 [ <i>Saccharomyces boulardii</i> ]                          | 8.6   | 37.39 | 9.09  | 1 | 1 | 1 | 1 | 77   | 8.53  |
| KQC40759.1 | Mitochondrial ribosomal protein of the small subunit [ <i>Saccharomyces boulardii</i> ]                  | 13.5  | 37.19 | 6.09  | 1 | 1 | 1 | 1 | 115  | 11.03 |
| KQC42690.1 | Endoplasmic reticulum transmembrane protein [ <i>Saccharomyces boulardii</i> ]                           | 23.4  | 37.18 | 4.85  | 1 | 1 | 1 | 1 | 206  | 9.77  |
| KQC45099.1 | Nucleolar protein [ <i>Saccharomyces boulardii</i> ]                                                     | 94.3  | 37.10 | 1.98  | 1 | 1 | 1 | 1 | 810  | 7.18  |
| KQC41043.1 | Component of nuclear aminoacylation-dependent tRNA export pathway [ <i>Saccharomyces boulardii</i> ]     | 84.7  | 36.91 | 1.31  | 1 | 1 | 1 | 2 | 761  | 5.41  |

|            |                                                                                                         |       |       |       |   |   |   |   |      |       |
|------------|---------------------------------------------------------------------------------------------------------|-------|-------|-------|---|---|---|---|------|-------|
| KQC42821.1 | Monocarboxylate/proton symporter of the plasma membrane [ <i>Saccharomyces boulardii</i> ]              | 69.4  | 36.83 | 4.22  | 1 | 1 | 1 | 1 | 616  | 5.80  |
| KQC41196.1 | Bisphosphate-3'-nucleotidase [ <i>Saccharomyces boulardii</i> ]                                         | 39.1  | 36.82 | 3.64  | 1 | 1 | 1 | 1 | 357  | 6.20  |
| KQC44268.1 | Subunit D of the V1 peripheral membrane domain of V-ATPase [ <i>Saccharomyces boulardii</i> ]           | 29.2  | 36.80 | 11.33 | 1 | 1 | 1 | 1 | 256  | 5.92  |
| KQC41861.1 | SPG4p required for high temperature survival during stationary phase [ <i>Saccharomyces boulardii</i> ] | 13.2  | 36.66 | 9.57  | 1 | 1 | 1 | 1 | 115  | 6.80  |
| KQC41172.1 | Ribosomal protein P2 alpha [ <i>Saccharomyces boulardii</i> ]                                           | 10.7  | 36.56 | 11.32 | 1 | 1 | 1 | 1 | 106  | 4.04  |
| KQC44330.1 | Inositol phosphosphingolipid phospholipase C [ <i>Saccharomyces boulardii</i> ]                         | 53.9  | 36.54 | 3.77  | 1 | 1 | 1 | 1 | 477  | 7.53  |
| KQC45301.1 | Subunit of the mitochondrial (mt) i-AAA protease supercomplex [ <i>Saccharomyces boulardii</i> ]        | 47.1  | 36.44 | 2.40  | 1 | 1 | 1 | 1 | 417  | 9.32  |
| KOH51847.1 | RPB7p RNA polymerase II subunit B16 [ <i>Saccharomyces boulardii</i> ]                                  | 16.6  | 36.33 | 8.67  | 2 | 1 | 1 | 1 | 150  | 7.30  |
| KQC43338.1 | Component of RNA polymerase transcription factor TFIIH holoenzyme [ <i>Saccharomyces boulardii</i> ]    | 95.3  | 36.30 | 1.07  | 1 | 1 | 1 | 1 | 843  | 6.05  |
| KQC44386.1 | Subunit of the vacuolar transporter chaperone (VTC) complex [ <i>Saccharomyces boulardii</i> ]          | 14.4  | 36.29 | 4.65  | 1 | 1 | 1 | 1 | 129  | 10.52 |
| KQC41489.1 | hypothetical protein AB282_04350 [ <i>Saccharomyces boulardii</i> ]                                     | 33.6  | 36.28 | 8.03  | 1 | 1 | 2 | 2 | 299  | 6.79  |
| KQC45764.1 | N-succinyl-5-aminoimidazole-4-carboxamide ribotide synthetase [ <i>Saccharomyces boulardii</i> ]        | 34.6  | 36.12 | 8.17  | 1 | 1 | 1 | 1 | 306  | 5.95  |
| KQC42883.1 | Mitochondrial ribosomal protein of the small subunit [ <i>Saccharomyces boulardii</i> ]                 | 30.2  | 36.02 | 4.51  | 1 | 1 | 1 | 1 | 266  | 8.59  |
| KOH49410.1 | SET3p Defining member of the SET3 histone deacetylase complex [ <i>Saccharomyces boulardii</i> ]        | 85.4  | 35.91 | 2.13  | 2 | 1 | 1 | 1 | 751  | 8.73  |
| KQC41452.1 | Cytochrome b5 [ <i>Saccharomyces boulardii</i> ]                                                        | 13.3  | 35.70 | 14.17 | 1 | 2 | 2 | 2 | 120  | 4.49  |
| KQC44693.1 | RNA-binding subunit of the mRNA cleavage and polyadenylation factor [ <i>Saccharomyces boulardii</i> ]  | 153.3 | 35.67 | 0.59  | 1 | 1 | 1 | 1 | 1357 | 5.91  |
| KQC43891.1 | Member of the PUF protein family [ <i>Saccharomyces boulardii</i> ]                                     | 98.3  | 35.60 | 3.36  | 1 | 1 | 2 | 2 | 893  | 6.55  |
| KQC45344.1 | hypothetical protein AB282_00106 [ <i>Saccharomyces boulardii</i> ]                                     | 52.0  | 35.58 | 4.29  | 1 | 1 | 2 | 2 | 466  | 9.06  |
| KQC42844.1 | PMT4p O-mannosyltransferase [ <i>Saccharomyces boulardii</i> ]                                          | 87.9  | 35.57 | 1.44  | 1 | 1 | 1 | 1 | 762  | 6.93  |
| KQC40828.1 | hypothetical protein AB282_04758 [ <i>Saccharomyces boulardii</i> ]                                     | 79.9  | 35.49 | 3.61  | 1 | 1 | 1 | 1 | 692  | 8.15  |
| KQC41408.1 | Subunit of tRNA (1-methyladenosine) methyltransferase [ <i>Saccharomyces boulardii</i> ]                | 54.3  | 35.35 | 2.09  | 1 | 1 | 1 | 1 | 478  | 7.61  |
| KQC44074.1 | Central component of GID Complex, involved in FBPase degradation [ <i>Saccharomyces boulardii</i> ]     | 108.1 | 35.34 | 1.15  | 1 | 1 | 1 | 1 | 958  | 4.65  |
| KQC42550.1 | Mitochondrial ribosomal protein of the large subunit [ <i>Saccharomyces boulardii</i> ]                 | 22.4  | 35.32 | 4.62  | 1 | 1 | 1 | 1 | 195  | 10.11 |
| KQC44879.1 | Subunit of the Sec61p translocation complex (Sec61p-Sss1p-Sbh1p) [ <i>Saccharomyces boulardii</i> ]     | 8.9   | 35.11 | 12.50 | 1 | 1 | 1 | 1 | 80   | 9.45  |
| KQC40594.1 | tRNA(Ser) Um(44) 2'-O-methyltransferase [ <i>Saccharomyces boulardii</i> ]                              | 64.9  | 35.03 | 1.76  | 1 | 1 | 1 | 2 | 567  | 8.56  |
| KQC42630.1 | Adenylylsulfate kinase [ <i>Saccharomyces boulardii</i> ]                                               | 23.0  | 35.01 | 6.44  | 1 | 1 | 1 | 1 | 202  | 8.13  |
| KQC43486.1 | RNA binding protein, component of the U1 snRNP protein [ <i>Saccharomyces boulardii</i> ]               | 56.9  | 34.86 | 2.10  | 1 | 1 | 1 | 1 | 523  | 8.37  |
| KQC44640.1 | Component of the NuA4 histone acetyltransferase complex [ <i>Saccharomyces boulardii</i> ]              | 112.4 | 34.83 | 1.22  | 1 | 1 | 1 | 1 | 982  | 9.04  |
| KQC44144.1 | Calmodulin-dependent protein kinase [ <i>Saccharomyces boulardii</i> ]                                  | 50.3  | 34.80 | 2.24  | 1 | 1 | 1 | 1 | 446  | 6.27  |

|            |                                                                                                        |       |       |       |   |   |   |   |      |       |
|------------|--------------------------------------------------------------------------------------------------------|-------|-------|-------|---|---|---|---|------|-------|
| KQC41458.1 | Catalytic subunit of the Dcp1p-Dcp2p decapping enzyme complex [ <i>Saccharomyces boulardii</i> ]       | 108.5 | 34.79 | 0.72  | 1 | 1 | 1 | 1 | 969  | 5.88  |
| KQC41832.1 | Essential component of the Rpd3S histone deacetylase complex [ <i>Saccharomyces boulardii</i> ]        | 78.8  | 34.77 | 1.90  | 1 | 1 | 1 | 1 | 684  | 8.78  |
| KQC44867.1 | Integral membrane protein [ <i>Saccharomyces boulardii</i> ]                                           | 15.9  | 34.50 | 18.88 | 1 | 2 | 2 | 2 | 143  | 4.56  |
| KQC40925.1 | Catalytic subunit of the histone acetyltransferase complex (NuA4) [ <i>Saccharomyces boulardii</i> ]   | 52.6  | 34.44 | 3.15  | 1 | 1 | 1 | 1 | 445  | 7.71  |
| KQC42941.1 | Subunit of the Nup84p subcomplex of the nuclear pore complex (NPC) [ <i>Saccharomyces boulardii</i> ]  | 84.8  | 34.41 | 1.61  | 1 | 1 | 1 | 1 | 744  | 4.65  |
| KQC41042.1 | Zinc-finger transcription factor [ <i>Saccharomyces boulardii</i> ]                                    | 100.7 | 33.88 | 1.21  | 1 | 1 | 1 | 1 | 910  | 7.36  |
| KQC41871.1 | Component of the kinetochore-associated Ndc80 complex [ <i>Saccharomyces boulardii</i> ]               | 24.6  | 33.82 | 5.63  | 1 | 1 | 1 | 1 | 213  | 4.96  |
| KQC42451.1 | Zinc-finger protein [ <i>Saccharomyces boulardii</i> ]                                                 | 36.9  | 33.78 | 3.58  | 1 | 1 | 1 | 1 | 335  | 9.25  |
| KQC43500.1 | Member of an oxysterol-binding protein family [ <i>Saccharomyces boulardii</i> ]                       | 113.7 | 33.76 | 1.61  | 1 | 1 | 1 | 1 | 996  | 8.57  |
| KQC42943.1 | Voltage-gated chloride channel [ <i>Saccharomyces boulardii</i> ]                                      | 72.1  | 33.60 | 2.79  | 2 | 1 | 1 | 1 | 646  | 5.41  |
| KQC43548.1 | homoserine kinase [ <i>Saccharomyces boulardii</i> ]                                                   | 38.7  | 33.47 | 2.52  | 1 | 1 | 1 | 1 | 357  | 5.41  |
| KQC40424.1 | GTPase required for ribosomal subunit synthesis and rRNA processing [ <i>Saccharomyces boulardii</i> ] | 135.5 | 33.42 | 0.85  | 1 | 1 | 1 | 1 | 1183 | 6.81  |
| KQC44389.1 | Integral membrane protein required for ER to Golgi transport [ <i>Saccharomyces boulardii</i> ]        | 9.4   | 33.29 | 18.82 | 1 | 1 | 1 | 1 | 85   | 9.52  |
| KQC43661.1 | SDA1p required for actin organization and passage through Start [ <i>Saccharomyces boulardii</i> ]     | 86.6  | 33.27 | 1.04  | 1 | 1 | 1 | 1 | 767  | 6.93  |
| KQC43696.1 | ATP-binding protein [ <i>Saccharomyces boulardii</i> ]                                                 | 33.3  | 33.26 | 3.10  | 1 | 1 | 1 | 1 | 290  | 5.41  |
| KOH51140.1 | RSM18p Mitochondrial ribosomal protein of the small subunit [ <i>Saccharomyces boulardii</i> ]         | 17.4  | 32.86 | 8.50  | 2 | 1 | 1 | 1 | 153  | 10.83 |
| KQC41594.1 | C-14 sterol reductase [ <i>Saccharomyces boulardii</i> ]                                               | 50.6  | 32.79 | 1.60  | 1 | 1 | 1 | 1 | 438  | 8.85  |
| KQC45235.1 | PER1p of the endoplasmic reticulum [ <i>Saccharomyces boulardii</i> ]                                  | 57.8  | 32.76 | 2.45  | 1 | 1 | 1 | 1 | 490  | 6.27  |
| KQC41773.1 | Phospholipase B (lysophospholipase) involved in lipid metabolism [ <i>Saccharomyces boulardii</i> ]    | 71.1  | 32.76 | 1.67  | 1 | 1 | 1 | 1 | 658  | 4.75  |
| KQC45637.1 | hypothetical protein AB282_00399 [ <i>Saccharomyces boulardii</i> ]                                    | 53.6  | 32.73 | 1.64  | 1 | 1 | 1 | 1 | 488  | 7.20  |
| KQC41517.1 | Karyopherin alpha [ <i>Saccharomyces boulardii</i> ]                                                   | 60.4  | 32.72 | 1.29  | 1 | 1 | 1 | 1 | 542  | 4.91  |
| KQC45632.1 | Methyltransferase [ <i>Saccharomyces boulardii</i> ]                                                   | 50.4  | 32.71 | 2.29  | 1 | 1 | 1 | 1 | 436  | 7.72  |
| KQC42033.1 | 3'-5' exoribonuclease [ <i>Saccharomyces boulardii</i> ]                                               | 110.7 | 32.56 | 1.03  | 1 | 1 | 1 | 1 | 969  | 9.04  |
| KQC42911.1 | Deoxyhypusine hydroxylase [ <i>Saccharomyces boulardii</i> ]                                           | 36.1  | 32.46 | 2.77  | 1 | 1 | 1 | 1 | 325  | 4.87  |
| KQC40627.1 | 2-methylisocitrate lyase of the mitochondrial matrix [ <i>Saccharomyces boulardii</i> ]                | 64.9  | 32.38 | 1.57  | 1 | 1 | 1 | 1 | 575  | 7.56  |
| KQC44684.1 | Subunit of TFIIH and nucleotide excision repair factor 3 complex [ <i>Saccharomyces boulardii</i> ]    | 72.8  | 32.26 | 2.34  | 1 | 1 | 1 | 1 | 642  | 6.90  |
| KQC40754.1 | Cyclin (Bur2p)-dependent protein kinase [ <i>Saccharomyces boulardii</i> ]                             | 74.2  | 32.10 | 3.04  | 1 | 2 | 2 | 2 | 657  | 9.52  |
| KQC42768.1 | Aminopeptidase yscII [ <i>Saccharomyces boulardii</i> ]                                                | 97.4  | 31.92 | 1.86  | 1 | 1 | 1 | 1 | 861  | 5.99  |
| KQC44709.1 | GCN2p kinase [ <i>Saccharomyces boulardii</i> ]                                                        | 187.0 | 31.90 | 0.37  | 1 | 1 | 1 | 1 | 1633 | 6.48  |
| KQC43039.1 | Core subunit of the RENT complex [ <i>Saccharomyces boulardii</i> ]                                    | 126.7 | 31.90 | 0.85  | 1 | 1 | 1 | 1 | 1173 | 7.55  |

|            |                                                                                                                |       |       |       |   |   |   |   |      |      |
|------------|----------------------------------------------------------------------------------------------------------------|-------|-------|-------|---|---|---|---|------|------|
| KQC44496.1 | EUG1p disulfide isomerase of the endoplasmic reticulum lumen [ <i>Saccharomyces boulardii</i> ]                | 59.0  | 31.61 | 2.51  | 1 | 1 | 1 | 1 | 517  | 4.96 |
| KQC40405.1 | hypothetical protein AB282_05039 [ <i>Saccharomyces boulardii</i> ]                                            | 40.7  | 31.49 | 2.75  | 1 | 1 | 1 | 1 | 364  | 5.16 |
| KQC43463.1 | cystathionine beta-lyase [ <i>Saccharomyces boulardii</i> ]                                                    | 42.4  | 31.42 | 3.17  | 1 | 1 | 1 | 1 | 378  | 5.91 |
| KQC43691.1 | hypothetical protein AB282_01947 [ <i>Saccharomyces boulardii</i> ]                                            | 45.2  | 31.41 | 1.46  | 1 | 1 | 1 | 1 | 411  | 8.03 |
| KQC40667.1 | Essential 121 kDa subunit of the exocyst complex [ <i>Saccharomyces boulardii</i> ]                            | 160.9 | 31.32 | 1.20  | 1 | 1 | 1 | 1 | 1412 | 7.28 |
| KQC44917.1 | Ubiquitin-conjugating enzyme [ <i>Saccharomyces boulardii</i> ]                                                | 16.3  | 31.29 | 7.43  | 2 | 1 | 1 | 1 | 148  | 6.77 |
| KQC45312.1 | Zinc metalloendopeptidase [ <i>Saccharomyces boulardii</i> ]                                                   | 78.8  | 31.14 | 1.31  | 1 | 1 | 1 | 1 | 686  | 5.72 |
| KQC43289.1 | hypothetical protein AB282_01365 [ <i>Saccharomyces boulardii</i> ]                                            | 16.9  | 31.13 | 5.10  | 1 | 1 | 1 | 1 | 157  | 9.99 |
| KQC42489.1 | Dihydroorotase [ <i>Saccharomyces boulardii</i> ]                                                              | 40.4  | 31.12 | 2.20  | 1 | 1 | 1 | 1 | 364  | 6.54 |
| KQC40840.1 | RNA polymerase I subunit A43 [ <i>Saccharomyces boulardii</i> ]                                                | 36.2  | 31.12 | 3.68  | 1 | 1 | 1 | 1 | 326  | 4.89 |
| KQC44036.1 | GTS1p involved in Arf3p regulation and in transcription regulation [ <i>Saccharomyces boulardii</i> ]          | 44.3  | 31.08 | 3.30  | 1 | 1 | 1 | 1 | 394  | 7.78 |
| KQC40846.1 | Mitochondrial inner membrane Mg(2+) channel [ <i>Saccharomyces boulardii</i> ]                                 | 54.2  | 30.87 | 1.06  | 1 | 1 | 1 | 1 | 470  | 9.38 |
| KQC43027.1 | Mitochondrial protein required for cytochrome c oxidase assembly [ <i>Saccharomyces boulardii</i> ]            | 9.9   | 30.81 | 24.71 | 1 | 1 | 1 | 1 | 85   | 9.36 |
| KQC44783.1 | RNA-binding protein [ <i>Saccharomyces boulardii</i> ]                                                         | 59.8  | 30.80 | 1.88  | 1 | 1 | 1 | 1 | 533  | 9.63 |
| KQC42339.1 | Methionine aminopeptidase [ <i>Saccharomyces boulardii</i> ]                                                   | 43.3  | 30.75 | 6.20  | 1 | 2 | 2 | 2 | 387  | 7.88 |
| KQC44796.1 | Subunit of cohesin loading factor (Scc2p-Scc4p) [ <i>Saccharomyces boulardii</i> ]                             | 171.0 | 30.74 | 0.40  | 1 | 1 | 1 | 1 | 1493 | 6.90 |
| KQC45049.1 | Cis-golgi localized protein involved in ER to Golgi transport [ <i>Saccharomyces boulardii</i> ]               | 38.2  | 30.73 | 4.40  | 1 | 1 | 1 | 1 | 341  | 4.58 |
| KQC43390.1 | Subunit of the glycosylphosphatidylinositol transamidase complex [ <i>Saccharomyces boulardii</i> ]            | 68.7  | 30.58 | 1.97  | 1 | 1 | 1 | 1 | 610  | 5.31 |
| KQC41459.1 | Ubiquitin-binding protein [ <i>Saccharomyces boulardii</i> ]                                                   | 56.4  | 30.50 | 1.62  | 1 | 1 | 1 | 1 | 493  | 6.13 |
| KQC41207.1 | Non-catalytic subunit of the NatB N-terminal acetyltransferase [ <i>Saccharomyces boulardii</i> ]              | 92.7  | 30.50 | 1.13  | 1 | 1 | 1 | 1 | 796  | 7.84 |
| KQC41536.1 | Cytoplasmic protein [ <i>Saccharomyces boulardii</i> ]                                                         | 88.8  | 30.42 | 1.15  | 1 | 1 | 1 | 1 | 782  | 5.10 |
| KQC45419.1 | hypothetical protein AB282_00181 [ <i>Saccharomyces boulardii</i> ]                                            | 11.5  | 30.26 | 5.77  | 1 | 1 | 1 | 1 | 104  | 6.68 |
| KQC41986.1 | Subunit (17 kDa) of TFIID and SAGA complex [ <i>Saccharomyces boulardii</i> ]                                  | 17.3  | 30.22 | 15.92 | 1 | 1 | 1 | 1 | 157  | 6.32 |
| KOH47293.1 | SEC16p COPII vesicle coat protein required for ER transport vesicle budding [ <i>Saccharomyces boulardii</i> ] | 241.5 | 30.09 | 0.46  | 2 | 1 | 1 | 1 | 2195 | 5.38 |
| KQC43272.1 | Minor isoform of large subunit of ribonucleotide-diphosphate reductase [ <i>Saccharomyces boulardii</i> ]      | 99.2  | 30.01 | 0.90  | 2 | 1 | 1 | 1 | 885  | 6.21 |
| KQC42086.1 | Cofilin, involved in pH-dependent actin filament depolarization [ <i>Saccharomyces boulardii</i> ]             | 17.6  | 29.98 | 8.97  | 1 | 1 | 1 | 1 | 156  | 5.68 |
| KQC42575.1 | hypothetical protein AB282_03003 [ <i>Saccharomyces boulardii</i> ]                                            | 31.6  | 29.79 | 3.28  | 1 | 1 | 1 | 1 | 274  | 9.57 |
| KQC44134.1 | LSB3p containing a C-terminal SH3 domain [ <i>Saccharomyces boulardii</i> ]                                    | 48.5  | 29.68 | 1.77  | 2 | 1 | 1 | 1 | 451  | 6.05 |
| KQC44131.1 | Plasma membrane associated protein phosphatase [ <i>Saccharomyces boulardii</i> ]                              | 61.9  | 29.68 | 2.36  | 1 | 1 | 1 | 1 | 551  | 7.97 |
| KQC44221.1 | DNA dependent ATPase/DNA helicase [ <i>Saccharomyces boulardii</i> ]                                           | 126.9 | 29.64 | 0.80  | 1 | 1 | 1 | 1 | 1121 | 9.42 |

|            |                                                                                                        |       |       |       |   |   |   |   |      |      |
|------------|--------------------------------------------------------------------------------------------------------|-------|-------|-------|---|---|---|---|------|------|
| KQC40855.1 | Alpha-arrestin involved in ubiquitin-dependent endocytosis [ <i>Saccharomyces boulardii</i> ]          | 89.8  | 29.60 | 1.83  | 1 | 1 | 1 | 1 | 818  | 8.54 |
| KQC41604.1 | Subunit of heteropentameric Replication factor C (RF-C) [ <i>Saccharomyces boulardii</i> ]             | 38.2  | 29.52 | 1.76  | 1 | 1 | 1 | 1 | 340  | 6.44 |
| KQC40453.1 | WD40 domain-containing protein involved in endosomal recycling [ <i>Saccharomyces boulardii</i> ]      | 114.4 | 29.46 | 0.79  | 1 | 1 | 1 | 1 | 1013 | 6.18 |
| KQC43674.1 | Subunit of the prohibitin complex (Phb1p-Phb2p) [ <i>Saccharomyces boulardii</i> ]                     | 34.4  | 29.44 | 8.39  | 1 | 2 | 2 | 2 | 310  | 9.92 |
| KQC44525.1 | Component of the GARP (Golgi-associated retrograde protein) complex [ <i>Saccharomyces boulardii</i> ] | 74.3  | 29.40 | 1.87  | 1 | 1 | 1 | 1 | 641  | 5.76 |
| KQC42795.1 | FATty acid transporter [ <i>Saccharomyces boulardii</i> ]                                              | 81.0  | 29.22 | 2.00  | 1 | 1 | 2 | 2 | 750  | 5.05 |
| KQC45480.1 | High-affinity leucine permease [ <i>Saccharomyces boulardii</i> ]                                      | 67.7  | 29.17 | 1.64  | 1 | 1 | 1 | 1 | 609  | 8.24 |
| KQC44834.1 | Golgi-localized, leucine-zipper domain containing protein [ <i>Saccharomyces boulardii</i> ]           | 194.6 | 29.09 | 0.41  | 1 | 1 | 1 | 1 | 1698 | 5.69 |
| KQC44057.1 | One of three beta subunits of the Snf1 kinase complex [ <i>Saccharomyces boulardii</i> ]               | 46.5  | 29.06 | 1.93  | 2 | 1 | 1 | 1 | 415  | 6.23 |
| KQC40537.1 | Essential subunit of Sec63 complex [ <i>Saccharomyces boulardii</i> ]                                  | 31.3  | 28.98 | 3.65  | 1 | 1 | 1 | 1 | 274  | 9.72 |
| KQC40506.1 | U3 snoRNP protein [ <i>Saccharomyces boulardii</i> ]                                                   | 101.1 | 28.92 | 1.12  | 1 | 1 | 1 | 1 | 896  | 6.32 |
| KQC41997.1 | RING domain E3 ubiquitin ligase [ <i>Saccharomyces boulardii</i> ]                                     | 180.1 | 28.85 | 0.70  | 1 | 1 | 1 | 1 | 1562 | 5.53 |
| KOH48992.1 | REX2p 3'-5' RNA exonuclease [ <i>Saccharomyces boulardii</i> ]                                         | 30.9  | 28.72 | 4.46  | 2 | 1 | 1 | 1 | 269  | 6.86 |
| KQC42362.1 | hypothetical protein AB282_03544 [ <i>Saccharomyces boulardii</i> ]                                    | 31.9  | 28.66 | 2.55  | 1 | 1 | 1 | 1 | 274  | 6.81 |
| KQC42461.1 | Enzyme regulator [ <i>Saccharomyces boulardii</i> ]                                                    | 99.7  | 28.58 | 0.91  | 1 | 1 | 1 | 1 | 880  | 5.50 |
| KQC42285.1 | Inhibitor of carboxypeptidase Y (Prc1p), and Ras GAP (Ira2p) [ <i>Saccharomyces boulardii</i> ]        | 24.3  | 28.57 | 6.85  | 1 | 1 | 1 | 1 | 219  | 6.42 |
| KQC41659.1 | hypothetical protein AB282_03723 [ <i>Saccharomyces boulardii</i> ]                                    | 40.1  | 28.54 | 5.60  | 1 | 1 | 1 | 1 | 357  | 9.64 |
| KQC45719.1 | Cytochrome c heme lyase (holocytochrome c synthase) [ <i>Saccharomyces boulardii</i> ]                 | 30.1  | 28.53 | 3.35  | 1 | 1 | 1 | 1 | 269  | 5.50 |
| KQC43815.1 | Component of the nonsense-mediated mRNA decay (NMD) pathway [ <i>Saccharomyces boulardii</i> ]         | 45.0  | 28.47 | 2.84  | 1 | 1 | 1 | 1 | 387  | 9.85 |
| KQC44535.1 | Splicing factor [ <i>Saccharomyces boulardii</i> ]                                                     | 55.8  | 28.37 | 1.92  | 1 | 1 | 1 | 1 | 469  | 8.57 |
| KOH48286.1 | RPC19p RNA polymerase subunit AC19 [ <i>Saccharomyces boulardii</i> ]                                  | 11.5  | 28.33 | 11.00 | 2 | 1 | 1 | 1 | 100  | 4.35 |
| KQC42888.1 | reductase superfamily protein [ <i>Saccharomyces boulardii</i> ]                                       | 32.3  | 28.00 | 3.55  | 1 | 1 | 1 | 1 | 282  | 6.93 |
| KQC41988.1 | putative mannosidase [ <i>Saccharomyces boulardii</i> ]                                                | 50.5  | 27.91 | 1.75  | 1 | 1 | 1 | 1 | 458  | 4.75 |
| KQC40747.1 | Mitochondrial inner membrane protein [ <i>Saccharomyces boulardii</i> ]                                | 52.1  | 27.89 | 2.86  | 1 | 1 | 1 | 1 | 454  | 9.33 |
| KQC44009.1 | Component of the RNA polymerase II mediator complex [ <i>Saccharomyces boulardii</i> ]                 | 128.7 | 27.84 | 1.06  | 1 | 1 | 1 | 1 | 1132 | 5.10 |
| KQC44949.1 | T subunit of the mitochondrial glycine decarboxylase complex [ <i>Saccharomyces boulardii</i> ]        | 44.4  | 27.69 | 2.25  | 1 | 1 | 1 | 1 | 400  | 8.84 |
| KQC41307.1 | Ser/Thr protein kinase [ <i>Saccharomyces boulardii</i> ]                                              | 100.5 | 27.57 | 2.13  | 1 | 1 | 1 | 1 | 893  | 8.09 |
| KQC44481.1 | Glycerol proton symporter of the plasma membrane [ <i>Saccharomyces boulardii</i> ]                    | 63.6  | 27.52 | 1.76  | 1 | 1 | 1 | 1 | 569  | 6.55 |
| KQC41473.1 | Peptidyl-prolyl cis-trans isomerase (PPIase) [ <i>Saccharomyces boulardii</i> ]                        | 12.2  | 27.50 | 7.02  | 1 | 1 | 1 | 1 | 114  | 6.04 |
| KQC41300.1 | Essential nucleolar protein involved in pre-18S rRNA processing [ <i>Saccharomyces boulardii</i> ]     | 36.4  | 27.46 | 3.16  | 1 | 1 | 1 | 1 | 316  | 7.97 |

|            |                                                                                                                                                            |       |       |      |   |   |   |   |      |      |
|------------|------------------------------------------------------------------------------------------------------------------------------------------------------------|-------|-------|------|---|---|---|---|------|------|
| KQC42903.1 | AIM24p with a role in determining mitochondrial architecture [ <i>Saccharomyces boulardii</i> ]                                                            | 44.4  | 27.40 | 1.78 | 1 | 1 | 1 | 1 | 394  | 9.80 |
| KQC43089.1 | Mitochondrial translation initiation factor 3 (IF3, mIF3) [ <i>Saccharomyces boulardii</i> ]                                                               | 36.3  | 27.38 | 3.85 | 1 | 1 | 1 | 1 | 312  | 9.89 |
| KQC43299.1 | Mitochondrial matrix protein [ <i>Saccharomyces boulardii</i> ]                                                                                            | 18.4  | 27.37 | 5.16 | 1 | 1 | 1 | 1 | 155  | 9.67 |
| KQC41569.1 | RNA-binding subunit of Nrd1 complex [ <i>Saccharomyces boulardii</i> ]                                                                                     | 63.8  | 27.37 | 1.22 | 1 | 1 | 1 | 1 | 575  | 9.17 |
| KQC44190.1 | Activator of Cbk1p kinase [ <i>Saccharomyces boulardii</i> ]                                                                                               | 33.2  | 27.33 | 4.88 | 1 | 1 | 1 | 1 | 287  | 9.60 |
| KQC42043.1 | Ceramide synthase component [ <i>Saccharomyces boulardii</i> ]                                                                                             | 17.2  | 27.32 | 6.67 | 1 | 1 | 1 | 1 | 150  | 6.67 |
| KQC43824.1 | Formylglycinamide-ribonucleotide (FGAM)-synthetase [ <i>Saccharomyces boulardii</i> ]                                                                      | 148.8 | 27.30 | 0.66 | 1 | 1 | 1 | 1 | 1358 | 5.27 |
| KQC40651.1 | Component of both the SWI/SNF and RSC chromatin remodeling complex [ <i>Saccharomyces boulardii</i> ]                                                      | 53.8  | 27.24 | 1.47 | 1 | 1 | 1 | 1 | 477  | 5.48 |
| KQC41794.1 | FAR8p involved in recovery from arrest in response to pheromone [ <i>Saccharomyces boulardii</i> ]                                                         | 59.2  | 27.22 | 2.10 | 1 | 1 | 1 | 1 | 523  | 5.24 |
| KQC42266.1 | Core Sm protein Sm D3 [ <i>Saccharomyces boulardii</i> ]                                                                                                   | 11.2  | 27.20 | 8.91 | 1 | 1 | 1 | 1 | 101  | 9.99 |
| KQC41255.1 | Vacuolar membrane protein [ <i>Saccharomyces boulardii</i> ]                                                                                               | 20.1  | 27.20 | 2.72 | 1 | 1 | 1 | 1 | 184  | 5.45 |
| KQC40466.1 | Poly(A)RNA binding protein involved in nuclear mRNA export [ <i>Saccharomyces boulardii</i> ]                                                              | 67.3  | 27.17 | 2.67 | 1 | 1 | 1 | 1 | 599  | 9.20 |
| KQC41319.1 | hypothetical protein AB282_04180 [ <i>Saccharomyces boulardii</i> ]                                                                                        | 10.8  | 27.14 | 8.16 | 1 | 1 | 1 | 1 | 98   | 8.97 |
| KQC45173.1 | GTPase-activating protein [ <i>Saccharomyces boulardii</i> ]                                                                                               | 87.3  | 27.14 | 1.34 | 1 | 1 | 1 | 1 | 746  | 5.16 |
| KQC44524.1 | Htz1p-binding component of the SWR1 complex [ <i>Saccharomyces boulardii</i> ]                                                                             | 90.4  | 27.12 | 1.01 | 2 | 1 | 1 | 1 | 795  | 5.24 |
| KQC45424.1 | RCR1p of the ER membrane involved in cell wall chitin deposition [ <i>Saccharomyces boulardii</i> ]                                                        | 23.9  | 27.09 | 6.10 | 1 | 1 | 1 | 1 | 213  | 7.05 |
| KQC44404.1 | Type 2C protein phosphatase (PP2C) [ <i>Saccharomyces boulardii</i> ]                                                                                      | 47.8  | 27.05 | 1.81 | 2 | 1 | 1 | 1 | 442  | 4.98 |
| KQC41606.1 | Pseudouridine synthase [ <i>Saccharomyces boulardii</i> ]                                                                                                  | 45.2  | 27.03 | 2.73 | 1 | 1 | 1 | 1 | 403  | 6.58 |
| KQC41097.1 | 5'-3' exonuclease and flap-endonuclease [ <i>Saccharomyces boulardii</i> ]                                                                                 | 115.8 | 26.94 | 0.99 | 1 | 1 | 1 | 1 | 1006 | 6.81 |
| KQC40420.1 | putative FAD transporter [ <i>Saccharomyces boulardii</i> ]                                                                                                | 89.2  | 26.81 | 1.39 | 1 | 1 | 1 | 1 | 793  | 7.93 |
| KQC41194.1 | Cargo-binding mu subunit of AP-2 [ <i>Saccharomyces boulardii</i> ]                                                                                        | 55.5  | 26.70 | 1.63 | 1 | 1 | 1 | 1 | 491  | 8.27 |
| KQC44027.1 | RNA-dependent ATPase [ <i>Saccharomyces boulardii</i> ]                                                                                                    | 63.6  | 26.65 | 1.06 | 1 | 1 | 1 | 1 | 564  | 9.20 |
| KQC45844.1 | Cytoplasmic protein required for sporulation [ <i>Saccharomyces boulardii</i> ]                                                                            | 33.8  | 26.54 | 2.06 | 1 | 1 | 1 | 1 | 291  | 5.07 |
| KQC44729.1 | Ribosomal lysine methyltransferase [ <i>Saccharomyces boulardii</i> ]                                                                                      | 57.3  | 26.52 | 2.43 | 1 | 1 | 1 | 1 | 494  | 5.05 |
| KQC43454.1 | LSM12p function in RNA processing [ <i>Saccharomyces boulardii</i> ]                                                                                       | 21.3  | 26.30 | 4.81 | 1 | 1 | 1 | 1 | 187  | 9.39 |
| KQC45027.1 | Component of the Rpd3L histone deacetylase complex [ <i>Saccharomyces boulardii</i> ]                                                                      | 33.8  | 26.28 | 3.74 | 1 | 1 | 1 | 1 | 294  | 6.54 |
| KQC40695.1 | Lipid-binding ER protein, enriched at nucleus-vacuolar junctions (NVJ) [ <i>Saccharomyces boulardii</i> ]                                                  | 87.2  | 26.23 | 1.56 | 1 | 1 | 1 | 1 | 770  | 7.44 |
| KQC41393.1 | hypothetical protein AB282_04254 [ <i>Saccharomyces boulardii</i> ]                                                                                        | 72.8  | 26.15 | 1.27 | 1 | 1 | 1 | 1 | 632  | 5.99 |
| KQC45078.1 | Vacuolar membrane antiporter with Ca <sup>2+</sup> /H <sup>+</sup> and K <sup>+</sup> /H <sup>+</sup> exchange activity [ <i>Saccharomyces boulardii</i> ] | 44.7  | 26.00 | 2.68 | 1 | 1 | 1 | 1 | 411  | 5.40 |
| KQC41938.1 | Mitochondrial ribosomal protein of the large subunit [ <i>Saccharomyces boulardii</i> ]                                                                    | 26.0  | 26.00 | 4.05 | 2 | 1 | 1 | 1 | 222  | 9.44 |

|            |                                                                                                        |       |       |       |   |   |   |   |      |       |
|------------|--------------------------------------------------------------------------------------------------------|-------|-------|-------|---|---|---|---|------|-------|
| KQC41557.1 | Kexin, a subtilisin-like protease (proprotein convertase) [ <i>Saccharomyces boulardii</i> ]           | 89.9  | 25.84 | 1.23  | 1 | 1 | 1 | 1 | 814  | 4.98  |
| KQC41882.1 | Essential DEAH-box ATP-dependent RNA helicase specific to U3 snoRNP [ <i>Saccharomyces boulardii</i> ] | 144.9 | 25.81 | 1.42  | 1 | 2 | 2 | 2 | 1267 | 6.39  |
| KQC44562.1 | Subunit of the RNA polymerase II mediator complex [ <i>Saccharomyces boulardii</i> ]                   | 159.8 | 25.81 | 0.70  | 1 | 1 | 1 | 1 | 1420 | 5.66  |
| KQC40918.1 | hypothetical protein AB282_04848 [ <i>Saccharomyces boulardii</i> ]                                    | 20.8  | 25.76 | 6.18  | 1 | 1 | 1 | 1 | 178  | 10.07 |
| KQC45236.1 | TFIID subunit (150 kDa) [ <i>Saccharomyces boulardii</i> ]                                             | 159.1 | 25.68 | 1.15  | 3 | 1 | 2 | 2 | 1387 | 5.90  |
| KQC43542.1 | DNA helicase and DNA-dependent ATPase [ <i>Saccharomyces boulardii</i> ]                               | 81.6  | 25.63 | 1.24  | 1 | 1 | 1 | 1 | 723  | 9.72  |
| KOH50996.1 | RMD8p Cytosolic protein required for sporulation [ <i>Saccharomyces boulardii</i> ]                    | 75.8  | 25.54 | 1.66  | 1 | 1 | 1 | 1 | 662  | 7.28  |
| KQC43099.1 | Serine-threonine protein kinase [ <i>Saccharomyces boulardii</i> ]                                     | 91.2  | 25.46 | 0.74  | 1 | 1 | 1 | 1 | 807  | 8.38  |
| KQC41739.1 | Subunit of the transmembrane ring of the nuclear pore complex (NPC) [ <i>Saccharomyces boulardii</i> ] | 74.1  | 25.40 | 1.53  | 1 | 1 | 1 | 1 | 655  | 8.34  |
| KQC43352.1 | Mitochondrial inner membrane protein [ <i>Saccharomyces boulardii</i> ]                                | 22.1  | 25.32 | 4.59  | 1 | 1 | 1 | 1 | 196  | 9.58  |
| KQC43080.1 | Shuttling pre-60S factor [ <i>Saccharomyces boulardii</i> ]                                            | 19.4  | 25.30 | 4.57  | 1 | 1 | 1 | 1 | 175  | 10.10 |
| KQC45335.1 | hypothetical protein AB282_00097 [ <i>Saccharomyces boulardii</i> ]                                    | 30.5  | 25.29 | 3.33  | 1 | 1 | 1 | 1 | 270  | 7.90  |
| KQC45684.1 | Subunit of the SWI/SNF chromatin remodeling complex [ <i>Saccharomyces boulardii</i> ]                 | 102.6 | 25.28 | 1.10  | 1 | 1 | 1 | 1 | 906  | 8.28  |
| KQC42396.1 | Mitochondrial ribosomal protein of the large subunit [ <i>Saccharomyces boulardii</i> ]                | 28.1  | 25.25 | 4.74  | 1 | 1 | 1 | 1 | 253  | 9.35  |
| KQC42372.1 | S-adenosylmethionine-dependent methyltransferase [ <i>Saccharomyces boulardii</i> ]                    | 29.6  | 25.23 | 3.45  | 1 | 1 | 1 | 1 | 261  | 5.20  |
| KQC44042.1 | Non-essential regulatory subunit B of protein phosphatase 2A (PP2A) [ <i>Saccharomyces boulardii</i> ] | 59.6  | 25.18 | 1.71  | 1 | 1 | 1 | 1 | 526  | 6.49  |
| KQC41367.1 | Cytosolic inhibitor of vacuolar proteinase B (PRB1) [ <i>Saccharomyces boulardii</i> ]                 | 8.6   | 25.11 | 12.00 | 1 | 1 | 1 | 1 | 75   | 6.80  |
| KQC45134.1 | Ubiquitin chain assembly factor (E4) [ <i>Saccharomyces boulardii</i> ]                                | 109.8 | 25.10 | 1.14  | 1 | 1 | 1 | 1 | 961  | 5.86  |
| KQC44061.1 | Vacuolar SNARE protein [ <i>Saccharomyces boulardii</i> ]                                              | 36.7  | 25.05 | 2.85  | 1 | 1 | 1 | 1 | 316  | 8.05  |
| KQC42034.1 | U2-snRNP associated splicing factor [ <i>Saccharomyces boulardii</i> ]                                 | 109.9 | 24.99 | 0.93  | 1 | 1 | 1 | 1 | 971  | 7.20  |
| KQC41341.1 | Low-affinity vacuolar phosphate transporter [ <i>Saccharomyces boulardii</i> ]                         | 99.5  | 24.61 | 1.34  | 1 | 1 | 1 | 1 | 894  | 8.02  |
| KQC42958.1 | Dihydroxyacid dehydratase [ <i>Saccharomyces boulardii</i> ]                                           | 62.8  | 24.43 | 2.22  | 1 | 1 | 1 | 1 | 585  | 7.83  |
| KQC44191.1 | Mitochondrial RNA polymerase [ <i>Saccharomyces boulardii</i> ]                                        | 153.0 | 24.42 | 0.81  | 1 | 1 | 1 | 1 | 1351 | 8.85  |
| KQC44716.1 | Mitochondrial glyoxalase II [ <i>Saccharomyces boulardii</i> ]                                         | 31.3  | 24.21 | 4.74  | 1 | 1 | 1 | 1 | 274  | 6.19  |
| KQC44610.1 | GTPase activating protein (GAP) for Rho1p [ <i>Saccharomyces boulardii</i> ]                           | 73.6  | 24.02 | 2.14  | 1 | 1 | 1 | 1 | 654  | 9.51  |
| KQC42314.1 | putative glycoside hydrolase of the spore wall envelope [ <i>Saccharomyces boulardii</i> ]             | 47.3  | 23.91 | 1.42  | 1 | 1 | 1 | 1 | 422  | 7.80  |
| KQC41368.1 | Poly (A)+ RNA-binding protein [ <i>Saccharomyces boulardii</i> ]                                       | 50.7  | 23.83 | 1.77  | 1 | 1 | 1 | 1 | 453  | 5.11  |
| KQC44691.1 | Component of the RSC chromatin remodeling complex [ <i>Saccharomyces boulardii</i> ]                   | 101.7 | 23.80 | 1.24  | 1 | 1 | 1 | 1 | 885  | 8.03  |
| KQC40604.1 | Subunit of vacuolar transporter chaperone (VTC) complex [ <i>Saccharomyces boulardii</i> ]             | 96.4  | 23.78 | 1.56  | 1 | 1 | 1 | 1 | 835  | 7.64  |

|            |                                                                                                          |       |       |      |   |   |   |   |      |       |
|------------|----------------------------------------------------------------------------------------------------------|-------|-------|------|---|---|---|---|------|-------|
| KOH48001.1 | GAL11p Subunit of the RNA polymerase II mediator complex [ <i>Saccharomyces boulardii</i> ]              | 121.2 | 23.65 | 0.64 | 2 | 1 | 1 | 1 | 1088 | 9.79  |
| KOH47275.1 | MSD1p Mitochondrial aspartyl-tRNA synthetase [ <i>Saccharomyces boulardii</i> ]                          | 75.4  | 23.62 | 1.37 | 2 | 1 | 1 | 1 | 658  | 8.72  |
| KQC43507.1 | Constituent of 66S pre-ribosomal particle [ <i>Saccharomyces boulardii</i> ]                             | 51.7  | 23.59 | 2.21 | 2 | 1 | 1 | 1 | 453  | 9.26  |
| KQC41987.1 | Member of the ChAPs family (Chs5p-Arf1p-binding protein) [ <i>Saccharomyces boulardii</i> ]              | 82.0  | 23.42 | 2.35 | 1 | 1 | 1 | 1 | 724  | 5.36  |
| KQC43247.1 | Basic leucine zipper (bZIP) transcription factor, in ATF/CREB family [ <i>Saccharomyces boulardii</i> ]  | 47.2  | 23.42 | 3.01 | 2 | 1 | 1 | 1 | 432  | 7.39  |
| KQC43403.1 | putative low-affinity copper transporter of the vacuolar membrane [ <i>Saccharomyces boulardii</i> ]     | 21.6  | 23.41 | 3.17 | 1 | 1 | 1 | 1 | 189  | 7.42  |
| KQC43464.1 | E1-like protein that activates Urm1p before urmylation [ <i>Saccharomyces boulardii</i> ]                | 49.3  | 23.16 | 2.50 | 1 | 1 | 1 | 1 | 440  | 6.54  |
| KQC43511.1 | Subunit of both RNase MRP and nuclear RNase P [ <i>Saccharomyces boulardii</i> ]                         | 32.2  | 23.10 | 4.10 | 1 | 1 | 1 | 1 | 293  | 9.66  |
| KQC44931.1 | Mitochondrial ribosomal protein of the small subunit [ <i>Saccharomyces boulardii</i> ]                  | 23.4  | 23.07 | 5.42 | 1 | 1 | 1 | 1 | 203  | 9.28  |
| KQC43397.1 | Integral membrane protein of the early Golgi apparatus and ER [ <i>Saccharomyces boulardii</i> ]         | 26.3  | 22.78 | 5.26 | 1 | 1 | 1 | 1 | 228  | 8.40  |
| KQC42721.1 | Subunit of U3-containing Small Subunit (SSU) processome complex [ <i>Saccharomyces boulardii</i> ]       | 29.6  | 22.72 | 4.80 | 1 | 1 | 1 | 1 | 250  | 10.18 |
| KQC41095.1 | Nuclear protein that inhibits replication of Brome mosaic virus [ <i>Saccharomyces boulardii</i> ]       | 47.4  | 22.57 | 2.91 | 1 | 1 | 1 | 1 | 412  | 4.83  |
| KQC43151.1 | Subunit of the SF3a splicing factor complex [ <i>Saccharomyces boulardii</i> ]                           | 33.0  | 22.46 | 6.79 | 1 | 1 | 1 | 1 | 280  | 8.24  |
| KOH47250.1 | TAF14p Subunit of TFIID, TFIIF, INO80, SWI/SNF, and NuA3 complexes [ <i>Saccharomyces boulardii</i> ]    | 50.7  | 22.42 | 1.55 | 2 | 1 | 1 | 1 | 452  | 4.61  |
| KQC45068.1 | Subunit of the Nup84p subcomplex of the nuclear pore complex (NPC) [ <i>Saccharomyces boulardii</i> ]    | 83.6  | 22.29 | 0.96 | 1 | 1 | 1 | 1 | 726  | 4.86  |
| KQC43722.1 | Mitochondrial protein required for assembly of cytochrome bc1 complex [ <i>Saccharomyces boulardii</i> ] | 17.5  | 22.22 | 6.80 | 1 | 1 | 1 | 1 | 147  | 9.17  |
| KQC40770.1 | Subunit of the HDA1 histone deacetylase complex [ <i>Saccharomyces boulardii</i> ]                       | 75.4  | 22.18 | 1.07 | 1 | 1 | 1 | 1 | 655  | 6.27  |
| KOH51390.1 | POL3p Catalytic subunit of DNA polymerase delta [ <i>Saccharomyces boulardii</i> ]                       | 124.6 | 22.14 | 0.82 | 2 | 1 | 1 | 1 | 1097 | 8.07  |
| KQC45675.1 | F-Box protein involved in proteasome-dependent degradation of Aah1p [ <i>Saccharomyces boulardii</i> ]   | 70.5  | 21.99 | 1.26 | 1 | 1 | 1 | 1 | 637  | 6.28  |
| KQC40433.1 | RIF1p that binds to the Rap1p C-terminus [ <i>Saccharomyces boulardii</i> ]                              | 67.1  | 21.29 | 2.92 | 1 | 1 | 1 | 1 | 583  | 5.14  |
| KQC42701.1 | hypothetical protein AB282_03129 [ <i>Saccharomyces boulardii</i> ]                                      | 46.0  | 20.93 | 2.55 | 1 | 1 | 1 | 1 | 392  | 8.91  |
| KQC41064.1 | Vacuolar cation channel [ <i>Saccharomyces boulardii</i> ]                                               | 77.9  | 20.82 | 1.48 | 1 | 1 | 1 | 1 | 675  | 5.38  |
| KQC45734.1 | Essential nuclear protein [ <i>Saccharomyces boulardii</i> ]                                             | 35.7  | 20.71 | 3.59 | 1 | 1 | 1 | 1 | 306  | 5.25  |
| KQC44788.1 | Hydrophilic protein involved in ER/Golgi vesicle trafficking [ <i>Saccharomyces boulardii</i> ]          | 74.6  | 20.37 | 4.05 | 1 | 1 | 1 | 1 | 666  | 5.22  |
| KQC43856.1 | tRNAHis guanylyltransferase [ <i>Saccharomyces boulardii</i> ]                                           | 27.8  | 20.25 | 2.53 | 1 | 1 | 1 | 1 | 237  | 8.19  |
| KQC43946.1 | hypothetical protein AB282_02202 [ <i>Saccharomyces boulardii</i> ]                                      | 15.0  | 20.10 | 7.69 | 1 | 1 | 1 | 1 | 130  | 9.44  |
| KQC40600.1 | MET12p with MTHFR activity in vitro [ <i>Saccharomyces boulardii</i> ]                                   | 73.9  | 20.08 | 0.91 | 1 | 1 | 1 | 1 | 657  | 5.36  |



|            |                                                                                |       |       |      |   |   |   |   |     |      |
|------------|--------------------------------------------------------------------------------|-------|-------|------|---|---|---|---|-----|------|
| KQC45468.1 | Subunit of the SF3a splicing factor complex [ <i>Saccharomyces boulandii</i> ] | 104.2 | 19.59 | 0.78 | 1 | 1 | 1 | 1 | 899 | 8.13 |
|------------|--------------------------------------------------------------------------------|-------|-------|------|---|---|---|---|-----|------|
