# Supplementary material for: Isolation and Characteristics of Extracellular Vesicles Produced by Probiotics: Yeast Saccharomyces boulardii CNCM I-745 and Bacterium Streptococcus salivarius K12
Source: PubMed Central journal article supplement (PMC11126510; doi:10.1007/s12602-023-10085-3), 2023-05-20
Supplement: 12602_2023_10085_MOESM2_ESM.pdf [file 12602_2023_10085_MOESM2_ESM.pdf]

# **Isolation and characteristics of extracellular vesicles produced by probiotics: yeast *Saccharomyces boulardii* CNCM I-745 and bacterium *Streptococcus salivarius* K12**

Kamila Kulig<sup>1</sup>, Katarzyna Kowalik<sup>1</sup>, Magdalena Surowiec<sup>1,2</sup>, Elzbieta Karnas<sup>3</sup>, Olga Barczyk-Woznicka<sup>4</sup>, Ewa Zuba-Surma<sup>3</sup>, Elzbieta Pyza<sup>4</sup>, Andrzej Kozik<sup>5</sup>, Maria Rapala-Kozik<sup>1</sup>, Justyna Karkowska-Kuleta<sup>1\*</sup>

<sup>1</sup> Department of Comparative Biochemistry and Bioanalytics, Faculty of Biochemistry, Biophysics and Biotechnology, Jagiellonian University, Kraków, Poland

<sup>2</sup> Doctoral School of Exact and Natural Sciences, Jagiellonian University, Kraków, Poland

<sup>3</sup> Department of Cell Biology, Faculty of Biochemistry, Biophysics and Biotechnology, Jagiellonian University, Kraków, Poland

<sup>4</sup> Department of Cell Biology and Imaging, Institute of Zoology and Biomedical Research, Jagiellonian University, Kraków, Poland

<sup>5</sup> Department of Analytical Biochemistry, Faculty of Biochemistry, Biophysics and Biotechnology, Jagiellonian University, Kraków, Poland

\*Corresponding author: justyna.karkowska@uj.edu.pl

**Supplementary Table 2. Mass spectrometry identification of *Streptococcus salivarius* proteins in EVs.** The proteomic analysis of extracellular vesicles was performed with samples prepared with a total amount of proteins equal to 11 µg. After digestion with Trypsin/Lys-C Mix the resulting peptides were analyzed using UltiMate 3000 RSLCnano System coupled with Q-Exactive mass spectrometer with DPV-550 Digital PicoView nanospray source. The obtained lists of peaks were searched against the NCBI protein database with the locally installed MASCOT search engine using the taxonomy restrictions: *Streptococcus salivarius*. The Target Decoy PSM Validator was applied with the maximum false discovery rate (FDR) for peptides set to 0.01. Proteins identified with a score > 20 and a number of identified peptides ≥ 1 are only listed.

| Accession number | Description                                                                                 | Molecular mass [kDa] | Score   | Coverage | # Proteins | # Unique Peptides | # Peptides | # PSMs | # AAs | calc. pI |
|------------------|---------------------------------------------------------------------------------------------|----------------------|---------|----------|------------|-------------------|------------|--------|-------|----------|
| WP_002891301.1   | KxYKxGKxW signal peptide domain-containing protein [ <i>Streptococcus salivarius</i> ]      | 133.1                | 8000.85 | 72.98    | 72         | 26                | 71         | 257    | 1166  | 5.35     |
| WP_002890946.1   | extracellular solute-binding protein [ <i>Streptococcus salivarius</i> ]                    | 44.9                 | 5925.35 | 75.18    | 51         | 6                 | 23         | 131    | 415   | 5.34     |
| WP_002891210.1   | GH32 C-terminal domain-containing protein [ <i>Streptococcus salivarius</i> ]               | 144.8                | 5889.31 | 53.24    | 17         | 10                | 53         | 168    | 1298  | 4.98     |
| WP_002891316.1   | hypothetical protein [ <i>Streptococcus salivarius</i> ]                                    | 118.8                | 5307.92 | 53.30    | 22         | 48                | 48         | 157    | 1060  | 5.29     |
| WP_037597470.1   | SH3 domain-containing protein [ <i>Streptococcus salivarius</i> ]                           | 92.8                 | 4738.35 | 62.75    | 97         | 1                 | 36         | 111    | 851   | 6.00     |
| WP_084914426.1   | GH32 C-terminal domain-containing protein [ <i>Streptococcus salivarius</i> ]               | 145.2                | 4599.09 | 37.22    | 2          | 1                 | 38         | 125    | 1303  | 4.93     |
| WP_201552173.1   | GH32 C-terminal domain-containing protein [ <i>Streptococcus salivarius</i> ]               | 145.1                | 4491.93 | 37.15    | 3          | 1                 | 39         | 131    | 1303  | 4.97     |
| WP_181670414.1   | GH32 C-terminal domain-containing protein [ <i>Streptococcus salivarius</i> ]               | 145.6                | 4436.89 | 36.84    | 2          | 1                 | 38         | 118    | 1303  | 4.94     |
| HBJ22654.1       | hypothetical protein [ <i>Streptococcus salivarius</i> ]                                    | 92.7                 | 4413.30 | 53.47    | 54         | 0                 | 33         | 102    | 851   | 6.00     |
| WP_002891318.1   | KxYKxGKxW signal peptide domain-containing protein [ <i>Streptococcus salivarius</i> ]      | 95.5                 | 4334.82 | 52.85    | 60         | 9                 | 44         | 156    | 842   | 5.53     |
| WP_061652463.1   | extracellular solute-binding protein [ <i>Streptococcus</i> ]                               | 44.8                 | 3889.79 | 51.08    | 4          | 1                 | 18         | 90     | 415   | 5.34     |
| WP_201711931.1   | SH3 domain-containing protein [ <i>Streptococcus salivarius</i> ]                           | 92.7                 | 3667.86 | 46.06    | 34         | 1                 | 27         | 87     | 851   | 5.78     |
| WP_156209578.1   | KxYKxGKxW signal peptide domain-containing protein [ <i>Streptococcus salivarius</i> ]      | 132.7                | 3350.40 | 35.06    | 2          | 1                 | 39         | 121    | 1161  | 5.45     |
| WP_037597887.1   | BMP family protein [ <i>Streptococcus</i> ]                                                 | 37.3                 | 2977.04 | 62.36    | 24         | 4                 | 16         | 78     | 356   | 5.41     |
| WP_195187351.1   | phosphopyruvate hydratase, partial [ <i>Streptococcus salivarius</i> ]                      | 46.2                 | 2626.00 | 68.93    | 33         | 4                 | 20         | 51     | 428   | 4.75     |
| WP_037597995.1   | KxYKxGKxW signal peptide domain-containing protein [ <i>Streptococcus</i> ]                 | 122.9                | 2623.83 | 52.25    | 61         | 43                | 46         | 70     | 1089  | 5.31     |
| WP_197092241.1   | Ig-like domain-containing protein [ <i>Streptococcus salivarius</i> ]                       | 436.1                | 2500.31 | 50.68    | 39         | 10                | 42         | 58     | 4416  | 4.44     |
| MBS6885968.1     | SH3 domain-containing protein [ <i>Streptococcus salivarius</i> ]                           | 45.3                 | 2483.58 | 46.17    | 10         | 1                 | 12         | 42     | 418   | 8.44     |
| WP_002884208.1   | peptide ABC transporter substrate-binding protein [ <i>Streptococcus salivarius</i> ]       | 71.9                 | 2417.05 | 57.93    | 61         | 2                 | 29         | 58     | 656   | 5.24     |
| WP_002890213.1   | elongation factor Tu [ <i>Streptococcus</i> ]                                               | 43.8                 | 2301.09 | 62.06    | 15         | 6                 | 20         | 56     | 398   | 4.93     |
| WP_037598293.1   | peptide ABC transporter substrate-binding protein [ <i>Streptococcus salivarius</i> ]       | 72.9                 | 2056.28 | 51.83    | 10         | 1                 | 28         | 64     | 656   | 5.47     |
| MBZ5837697.1     | YSIRK signal domain/LPXTG anchor domain surface protein [ <i>Streptococcus salivarius</i> ] | 233.7                | 1863.24 | 33.74    | 81         | 3                 | 41         | 48     | 2107  | 5.00     |
| WP_002884461.1   | type I glyceraldehyde-3-phosphate dehydrogenase [ <i>Streptococcus</i> ]                    | 36.0                 | 1858.91 | 70.24    | 26         | 19                | 19         | 50     | 336   | 5.58     |
| WP_224111213.1   | glucosyl transferase, partial [ <i>Streptococcus salivarius</i> ]                           | 81.6                 | 1840.05 | 52.47    | 18         | 24                | 29         | 47     | 730   | 5.16     |
| WP_002886978.1   | peptide ABC transporter substrate-binding protein [ <i>Streptococcus salivarius</i> ]       | 72.9                 | 1839.44 | 56.25    | 39         | 25                | 27         | 49     | 656   | 5.36     |
| WP_002889856.1   | penicillin-binding protein PBP1A [ <i>Streptococcus salivarius</i> ]                        | 83.9                 | 1837.78 | 45.03    | 78         | 27                | 27         | 47     | 764   | 5.54     |
| WP_002891330.1   | glucosyl transferase [ <i>Streptococcus salivarius</i> ]                                    | 107.7                | 1834.86 | 46.18    | 24         | 27                | 36         | 53     | 955   | 5.39     |

|                |                                                                                             |       |         |       |     |    |    |    |      |      |
|----------------|---------------------------------------------------------------------------------------------|-------|---------|-------|-----|----|----|----|------|------|
| WP_002892041.1 | DNA-directed RNA polymerase subunit beta [ <i>Streptococcus</i> ]                           | 133.1 | 1809.39 | 43.12 | 36  | 41 | 41 | 66 | 1192 | 5.12 |
| EJO16087.1     | alpha-C protein [ <i>Streptococcus salivarius</i> K12]                                      | 166.7 | 1800.18 | 37.97 | 120 | 32 | 37 | 47 | 1633 | 4.88 |
| WP_037598248.1 | YSIRK-type signal peptide-containing protein, partial [ <i>Streptococcus salivarius</i> ]   | 180.3 | 1645.70 | 26.12 | 31  | 2  | 35 | 42 | 1654 | 4.98 |
| WP_155212158.1 | G5 domain-containing protein [ <i>Streptococcus salivarius</i> ]                            | 216.9 | 1593.06 | 26.69 | 146 | 41 | 43 | 46 | 1967 | 5.25 |
| WP_247922735.1 | transporter substrate-binding domain-containing protein [ <i>Streptococcus salivarius</i> ] | 28.3  | 1546.13 | 52.65 | 12  | 1  | 11 | 30 | 264  | 5.36 |
| WP_002890008.1 | glycoside hydrolase family 68 protein [ <i>Streptococcus salivarius</i> ]                   | 104.2 | 1514.82 | 34.71 | 88  | 23 | 23 | 41 | 971  | 4.96 |
| WP_002891317.1 | KxYKxGKxW signal peptide domain-containing protein [ <i>Streptococcus salivarius</i> ]      | 68.7  | 1513.09 | 44.44 | 80  | 25 | 26 | 44 | 621  | 5.24 |
| WP_002887576.1 | elongation factor Tu [ <i>Streptococcus</i> ]                                               | 43.8  | 1422.02 | 44.97 | 1   | 1  | 13 | 38 | 398  | 5.05 |
| MBS6319243.1   | DNA-directed RNA polymerase subunit alpha [ <i>Streptococcus salivarius</i> ]               | 34.3  | 1395.30 | 50.32 | 17  | 19 | 19 | 39 | 312  | 4.94 |
| WP_224111202.1 | GBS Bsp-like repeat-containing protein, partial [ <i>Streptococcus salivarius</i> ]         | 128.3 | 1332.93 | 37.55 | 71  | 8  | 29 | 40 | 1177 | 6.61 |
| WP_038675638.1 | N4-gp56 family major capsid protein [ <i>Streptococcus salivarius</i> ]                     | 30.2  | 1323.81 | 50.89 | 4   | 5  | 14 | 39 | 281  | 4.96 |
| WP_002890936.1 | EfeM/EfeO family lipoprotein [ <i>Streptococcus</i> ]                                       | 32.4  | 1295.52 | 60.69 | 54  | 14 | 14 | 32 | 290  | 4.97 |
| MBS5094002.1   | NADP-dependent glyceraldehyde-3-phosphate dehydrogenase [ <i>Streptococcus salivarius</i> ] | 50.9  | 1294.23 | 55.77 | 27  | 20 | 20 | 32 | 477  | 4.98 |
| WP_037597787.1 | GBS Bsp-like repeat-containing protein [ <i>Streptococcus salivarius</i> ]                  | 128.5 | 1274.69 | 28.74 | 104 | 3  | 30 | 36 | 1183 | 6.61 |
| WP_002889937.1 | amino acid ABC transporter substrate-binding protein [ <i>Streptococcus</i> ]               | 31.4  | 1244.09 | 52.84 | 22  | 3  | 11 | 31 | 282  | 8.31 |
| WP_002886342.1 | 30S ribosomal protein S2 [ <i>Streptococcus</i> ]                                           | 28.3  | 1233.33 | 56.47 | 10  | 13 | 13 | 40 | 255  | 5.16 |
| WP_002890793.1 | pyruvate kinase [ <i>Streptococcus</i> ]                                                    | 54.4  | 1226.03 | 54.60 | 26  | 8  | 22 | 36 | 500  | 5.06 |
| WP_002891326.1 | glucosyl transferase [ <i>Streptococcus salivarius</i> ]                                    | 83.9  | 1208.82 | 35.55 | 12  | 17 | 21 | 29 | 751  | 5.40 |
| MBS7215133.1   | DUF1080 domain-containing protein [ <i>Streptococcus salivarius</i> ]                       | 61.0  | 1134.69 | 22.55 | 1   | 1  | 10 | 34 | 550  | 4.97 |
| WP_014633924.1 | ABC transporter substrate-binding protein [ <i>Streptococcus</i> ]                          | 41.7  | 1130.76 | 57.29 | 42  | 19 | 19 | 33 | 391  | 6.65 |
| WP_195187315.1 | F0F1 ATP synthase subunit beta, partial [ <i>Streptococcus salivarius</i> ]                 | 50.3  | 1121.68 | 52.05 | 21  | 16 | 17 | 29 | 463  | 4.81 |
| WP_155123969.1 | GBS Bsp-like repeat-containing protein [ <i>Streptococcus salivarius</i> ]                  | 142.7 | 1109.35 | 23.35 | 151 | 0  | 28 | 32 | 1319 | 6.70 |
| WP_049545960.1 | metal ABC transporter substrate-binding protein [ <i>Streptococcus salivarius</i> ]         | 34.4  | 1105.68 | 55.05 | 48  | 14 | 14 | 41 | 307  | 7.85 |
| MBS6973642.1   | ABC transporter substrate-binding protein [ <i>Streptococcus salivarius</i> ]               | 37.4  | 1094.43 | 52.07 | 60  | 4  | 15 | 31 | 338  | 5.43 |
| WP_002890136.1 | peptidyl-prolyl cis-trans isomerase [ <i>Streptococcus</i> ]                                | 40.8  | 1059.69 | 50.79 | 31  | 15 | 15 | 22 | 380  | 5.25 |
| WP_004182359.1 | L-lactate dehydrogenase [ <i>Streptococcus</i> ]                                            | 35.3  | 1048.91 | 49.70 | 20  | 8  | 14 | 26 | 328  | 5.16 |
| WP_002891141.1 | phospho-sugar mutase [ <i>Streptococcus salivarius</i> ]                                    | 62.8  | 1040.00 | 42.31 | 44  | 17 | 17 | 23 | 572  | 4.88 |
| WP_002885626.1 | 30S ribosomal protein S5 [ <i>Streptococcus</i> ]                                           | 17.1  | 1006.18 | 60.98 | 7   | 10 | 10 | 31 | 164  | 9.85 |
| WP_037597997.1 | KxYKxGKxW signal peptide domain-containing protein [ <i>Streptococcus salivarius</i> ]      | 72.3  | 997.06  | 40.56 | 65  | 19 | 22 | 26 | 646  | 5.21 |
| MBS7214128.1   | class B sortase [ <i>Streptococcus salivarius</i> ]                                         | 24.0  | 976.64  | 68.27 | 16  | 12 | 12 | 23 | 208  | 5.01 |
| MBS4822640.1   | DUF5105 domain-containing protein [ <i>Streptococcus salivarius</i> ]                       | 42.5  | 857.85  | 51.85 | 52  | 16 | 16 | 19 | 378  | 5.01 |
| WP_002885642.1 | 30S ribosomal protein S8 [ <i>Streptococcus</i> ]                                           | 14.8  | 822.42  | 58.33 | 8   | 12 | 12 | 32 | 132  | 9.52 |
| WP_002891098.1 | ZinT/AdcA family metal-binding protein [ <i>Streptococcus</i> ]                             | 57.9  | 807.96  | 37.35 | 59  | 18 | 18 | 24 | 514  | 5.91 |
| WP_037598508.1 | 50S ribosomal protein L1 [ <i>Streptococcus</i> ]                                           | 24.4  | 805.61  | 50.66 | 10  | 11 | 11 | 27 | 229  | 9.23 |

|                |                                                                                                      |       |        |       |     |    |    |    |      |       |
|----------------|------------------------------------------------------------------------------------------------------|-------|--------|-------|-----|----|----|----|------|-------|
| ACN23005.1     | mannose-specific phosphotransferase system component IIAB high [ <i>Streptococcus salivarius</i> ]   | 36.3  | 805.29 | 51.34 | 29  | 11 | 13 | 24 | 335  | 5.49  |
| WP_002884710.1 | glucose-1-phosphate adenyltransferase subunit GlgD [ <i>Streptococcus</i> ]                          | 42.3  | 790.48 | 44.71 | 47  | 16 | 16 | 18 | 378  | 5.59  |
| WP_002890247.1 | peptidylprolyl isomerase [ <i>Streptococcus salivarius</i> ]                                         | 27.8  | 785.14 | 59.13 | 41  | 13 | 13 | 22 | 252  | 9.20  |
| WP_073922277.1 | ABC transporter ATP-binding protein, partial [ <i>Streptococcus salivarius</i> ]                     | 55.2  | 764.17 | 34.91 | 59  | 15 | 15 | 19 | 507  | 5.62  |
| EIC81674.1     | Hypothetical protein [ <i>Streptococcus salivarius</i> PS4]                                          | 31.7  | 760.18 | 50.35 | 12  | 14 | 14 | 18 | 282  | 5.80  |
| WP_003095623.1 | 50S ribosomal protein L10 [ <i>Streptococcus</i> ]                                                   | 17.6  | 759.42 | 80.24 | 14  | 12 | 12 | 17 | 167  | 4.84  |
| WP_155123927.1 | trypsin-like peptidase domain-containing protein [ <i>Streptococcus</i> ]                            | 41.3  | 758.16 | 45.34 | 32  | 12 | 12 | 17 | 397  | 4.84  |
| HBJ22627.1     | F0F1 ATP synthase subunit alpha [ <i>Streptococcus salivarius</i> ]                                  | 54.6  | 755.15 | 43.11 | 27  | 16 | 16 | 24 | 501  | 5.08  |
| WP_002889939.1 | MetQ/NlpA family ABC transporter substrate-binding protein [ <i>Streptococcus</i> ]                  | 32.7  | 753.84 | 46.33 | 23  | 10 | 10 | 24 | 300  | 5.14  |
| WP_002887066.1 | 50S ribosomal protein L23 [ <i>Streptococcus</i> ]                                                   | 10.8  | 738.48 | 60.20 | 6   | 8  | 8  | 29 | 98   | 9.63  |
| WP_021151430.1 | amino acid ABC transporter substrate-binding protein [ <i>Streptococcus</i> ]                        | 31.9  | 735.80 | 41.81 | 3   | 1  | 9  | 22 | 287  | 8.54  |
| WP_253183498.1 | substrate-binding domain-containing protein, partial [ <i>Streptococcus salivarius</i> ]             | 33.4  | 735.54 | 66.24 | 43  | 1  | 14 | 18 | 314  | 6.40  |
| WP_037597698.1 | KxYKxGKxW signal peptide domain-containing protein [ <i>Streptococcus salivarius</i> ]               | 176.3 | 725.08 | 16.89 | 118 | 21 | 21 | 23 | 1599 | 5.68  |
| RGW04557.1     | glucosyltransferase [ <i>Streptococcus salivarius</i> ]                                              | 167.7 | 716.86 | 18.51 | 103 | 23 | 24 | 24 | 1518 | 5.48  |
| WP_002884537.1 | elongation factor G [ <i>Streptococcus</i> ]                                                         | 76.6  | 714.51 | 34.05 | 11  | 16 | 16 | 20 | 693  | 4.92  |
| WP_143567035.1 | N4-gp56 family major capsid protein [ <i>Streptococcus salivarius</i> ]                              | 30.1  | 711.71 | 28.11 | 2   | 1  | 10 | 25 | 281  | 5.01  |
| WP_211180922.1 | ABC transporter substrate-binding protein [ <i>Streptococcus salivarius</i> ]                        | 35.6  | 707.94 | 61.56 | 10  | 1  | 14 | 18 | 333  | 8.47  |
| MBS6319482.1   | phenylalanine--tRNA ligase subunit beta [ <i>Streptococcus salivarius</i> ]                          | 86.9  | 693.20 | 25.53 | 89  | 16 | 16 | 18 | 799  | 4.84  |
| WP_156246919.1 | YSIRK-type signal peptide-containing protein [ <i>Streptococcus salivarius</i> ]                     | 558.5 | 687.53 | 9.58  | 145 | 1  | 19 | 20 | 5092 | 5.08  |
| MBS5181122.1   | PTS transporter subunit IIBC [ <i>Streptococcus salivarius</i> ]                                     | 77.7  | 680.62 | 24.79 | 76  | 16 | 16 | 19 | 726  | 6.68  |
| WP_002889982.1 | PTS sugar transporter subunit IIB [ <i>Streptococcus salivarius</i> ]                                | 35.5  | 667.50 | 56.97 | 19  | 15 | 16 | 24 | 330  | 5.15  |
| WP_002884746.1 | 30S ribosomal protein S7 [ <i>Streptococcus</i> ]                                                    | 17.7  | 658.75 | 66.67 | 6   | 11 | 11 | 22 | 156  | 10.17 |
| MBS4923661.1   | signal recognition particle protein [ <i>Streptococcus salivarius</i> ]                              | 57.8  | 650.77 | 32.12 | 42  | 14 | 14 | 17 | 520  | 6.51  |
| WP_253184019.1 | transporter substrate-binding domain-containing protein [ <i>Streptococcus salivarius</i> ]          | 29.3  | 648.08 | 59.62 | 29  | 15 | 15 | 18 | 265  | 6.18  |
| MBS5181476.1   | alpha-ketoacid dehydrogenase subunit beta [ <i>Streptococcus salivarius</i> ]                        | 35.8  | 647.57 | 40.36 | 34  | 15 | 15 | 18 | 332  | 5.02  |
| WP_002884322.1 | type I glutamate--ammonia ligase [ <i>Streptococcus</i> ]                                            | 50.1  | 640.07 | 34.45 | 14  | 13 | 13 | 17 | 447  | 4.96  |
| WP_037597506.1 | SH3 domain-containing protein [ <i>Streptococcus salivarius</i> ]                                    | 37.4  | 636.73 | 36.87 | 76  | 10 | 10 | 13 | 358  | 8.00  |
| MBS6732218.1   | sucrose-specific PTS transporter subunit IIBC [ <i>Streptococcus salivarius</i> ]                    | 66.9  | 631.37 | 15.96 | 41  | 6  | 6  | 14 | 633  | 5.24  |
| MBS5180052.1   | sn-glycerol-3-phosphate ABC transporter ATP-binding protein UgpC [ <i>Streptococcus salivarius</i> ] | 42.0  | 616.00 | 41.27 | 43  | 12 | 12 | 16 | 378  | 6.02  |
| WP_110980828.1 | DAK2 domain-containing protein [ <i>Streptococcus</i> ]                                              | 58.0  | 607.24 | 28.31 | 61  | 11 | 11 | 13 | 544  | 4.48  |
| MBS6120854.1   | DUF1002 domain-containing protein [ <i>Streptococcus salivarius</i> ]                                | 32.4  | 596.21 | 40.73 | 49  | 10 | 10 | 16 | 302  | 4.94  |
| WP_002885816.1 | fructose-bisphosphate aldolase [ <i>Streptococcus</i> ]                                              | 31.5  | 594.49 | 43.00 | 13  | 9  | 9  | 15 | 293  | 4.91  |
| WP_002883819.1 | uracil phosphoribosyltransferase [ <i>Streptococcus</i> ]                                            | 23.0  | 588.04 | 57.42 | 8   | 9  | 9  | 17 | 209  | 5.67  |
| WP_002886397.1 | molecular chaperone DnaK [ <i>Streptococcus</i> ]                                                    | 64.7  | 578.04 | 29.98 | 32  | 15 | 15 | 15 | 607  | 4.75  |

|                |                                                                                                               |       |        |       |     |    |    |    |     |       |
|----------------|---------------------------------------------------------------------------------------------------------------|-------|--------|-------|-----|----|----|----|-----|-------|
| MBS6761793.1   | D-alanyl-lipoteichoic acid biosynthesis protein DltD [ <i>Streptococcus salivarius</i> ]                      | 48.4  | 571.94 | 32.70 | 66  | 11 | 11 | 13 | 422 | 9.14  |
| WP_247924669.1 | phage portal protein [ <i>Streptococcus salivarius</i> ]                                                      | 57.0  | 568.05 | 39.64 | 10  | 15 | 15 | 16 | 502 | 4.88  |
| WP_073689733.1 | ABC transporter substrate-binding protein/permease, partial [ <i>Streptococcus salivarius</i> ]               | 53.8  | 544.21 | 29.80 | 54  | 9  | 12 | 13 | 490 | 7.43  |
| WP_002890932.1 | dihydrolipoyl dehydrogenase [ <i>Streptococcus salivarius</i> ]                                               | 62.0  | 539.97 | 30.43 | 113 | 13 | 15 | 15 | 585 | 4.93  |
| WP_002890636.1 | LemA family protein [ <i>Streptococcus</i> ]                                                                  | 20.7  | 535.03 | 52.15 | 22  | 7  | 8  | 14 | 186 | 5.71  |
| MBS6760418.1   | PTS mannose/fructose/sorbose transporter family subunit IID [ <i>Streptococcus salivarius</i> ]               | 33.2  | 533.19 | 29.28 | 31  | 7  | 7  | 15 | 304 | 9.39  |
| MBS6760798.1   | hypothetical protein [ <i>Streptococcus salivarius</i> ]                                                      | 62.6  | 527.34 | 28.52 | 78  | 13 | 13 | 14 | 575 | 4.91  |
| WP_002890555.1 | hypothetical protein [ <i>Streptococcus salivarius</i> ]                                                      | 22.1  | 526.42 | 41.18 | 47  | 5  | 5  | 8  | 204 | 5.31  |
| WP_002890004.1 | cation-transporting P-type ATPase [ <i>Streptococcus salivarius</i> ]                                         | 101.8 | 525.19 | 17.93 | 83  | 11 | 11 | 11 | 926 | 5.50  |
| WP_002887056.1 | 50S ribosomal protein L6 [ <i>Streptococcus</i> ]                                                             | 19.5  | 525.11 | 58.99 | 14  | 8  | 8  | 13 | 178 | 9.57  |
| MBF1719103.1   | ABC transporter ATP-binding protein [ <i>Streptococcus salivarius</i> ]                                       | 34.9  | 521.10 | 39.94 | 39  | 10 | 10 | 13 | 308 | 6.48  |
| HBJ24143.1     | septation ring formation regulator EzrA [ <i>Streptococcus salivarius</i> ]                                   | 66.4  | 520.96 | 21.08 | 54  | 12 | 12 | 14 | 574 | 4.77  |
| WP_002890299.1 | alanine dehydrogenase [ <i>Streptococcus salivarius</i> ]                                                     | 38.7  | 520.37 | 40.54 | 63  | 12 | 12 | 15 | 370 | 5.96  |
| MBS5421566.1   | ABC transporter ATP-binding protein [ <i>Streptococcus salivarius</i> ]                                       | 39.9  | 519.33 | 36.57 | 43  | 11 | 11 | 16 | 361 | 5.03  |
| WP_002891327.1 | glucosyl transferase [ <i>Streptococcus salivarius</i> ]                                                      | 107.4 | 512.22 | 16.39 | 100 | 6  | 13 | 14 | 958 | 5.08  |
| MBS6531561.1   | thiamine pyrophosphate-dependent dehydrogenase E1 component subunit alpha [ <i>Streptococcus salivarius</i> ] | 39.3  | 503.47 | 31.93 | 21  | 9  | 9  | 13 | 357 | 5.20  |
| MBS7214411.1   | triose-phosphate isomerase [ <i>Streptococcus salivarius</i> ]                                                | 26.5  | 501.57 | 39.68 | 16  | 3  | 7  | 12 | 252 | 4.75  |
| MBS6530050.1   | penicillin-binding protein PBP2A [ <i>Streptococcus salivarius</i> ]                                          | 84.8  | 496.66 | 19.61 | 68  | 14 | 14 | 16 | 775 | 5.33  |
| AEJ54136.1     | urease alpha subunit [ <i>Streptococcus salivarius</i> 57.I]                                                  | 61.3  | 490.02 | 24.12 | 19  | 11 | 11 | 13 | 568 | 5.15  |
| MBF1718705.1   | D-alanyl-D-alanine carboxypeptidase family protein [ <i>Streptococcus salivarius</i> ]                        | 29.4  | 486.28 | 50.94 | 51  | 7  | 7  | 11 | 265 | 5.96  |
| WP_002890381.1 | ATP-dependent Clp protease ATP-binding subunit [ <i>Streptococcus salivarius</i> ]                            | 83.9  | 478.62 | 19.97 | 66  | 12 | 12 | 13 | 756 | 5.47  |
| WP_002884739.1 | phosphoglycerate kinase [ <i>Streptococcus</i> ]                                                              | 42.0  | 473.55 | 34.34 | 23  | 11 | 11 | 14 | 399 | 5.05  |
| WP_002889802.1 | RIP metalloprotease RseP [ <i>Streptococcus salivarius</i> ]                                                  | 45.7  | 470.29 | 26.67 | 48  | 12 | 12 | 14 | 420 | 6.29  |
| WP_002891535.1 | matrixin family metalloprotease [ <i>Streptococcus salivarius</i> ]                                           | 48.0  | 469.58 | 24.55 | 79  | 8  | 8  | 13 | 440 | 9.17  |
| WP_002885755.1 | 50S ribosomal protein L3 [ <i>Streptococcus</i> ]                                                             | 22.4  | 468.98 | 28.85 | 3   | 5  | 5  | 11 | 208 | 10.07 |
| WP_002884784.1 | GTP-sensing pleiotropic transcriptional regulator CodY [ <i>Streptococcus</i> ]                               | 28.8  | 468.04 | 46.36 | 7   | 9  | 9  | 12 | 261 | 4.75  |
| WP_002885709.1 | 50S ribosomal protein L17 [ <i>Streptococcus</i> ]                                                            | 14.4  | 465.83 | 43.75 | 6   | 5  | 5  | 9  | 128 | 9.86  |
| MBS6890365.1   | large conductance mechanosensitive channel protein MscL [ <i>Streptococcus salivarius</i> ]                   | 13.3  | 464.16 | 22.22 | 20  | 2  | 3  | 7  | 126 | 5.15  |
| WP_155123925.1 | 30S ribosomal protein S3 [ <i>Streptococcus</i> ]                                                             | 23.2  | 461.40 | 51.92 | 9   | 9  | 9  | 13 | 208 | 9.64  |
| WP_002885833.1 | 30S ribosomal protein S4 [ <i>Streptococcus</i> ]                                                             | 23.0  | 459.36 | 47.78 | 6   | 13 | 13 | 16 | 203 | 10.07 |
| WP_002885764.1 | ketol-acid reductoisomerase [ <i>Streptococcus</i> ]                                                          | 37.3  | 455.93 | 30.29 | 19  | 6  | 9  | 12 | 340 | 4.87  |
| WP_002883761.1 | ABC transporter ATP-binding protein [ <i>Streptococcus</i> ]                                                  | 25.5  | 451.86 | 38.56 | 15  | 10 | 10 | 12 | 236 | 5.71  |
| WP_084913400.1 | ATP-dependent Clp protease ATP-binding subunit ClpX, partial [ <i>Streptococcus salivarius</i> ]              | 38.8  | 451.19 | 27.35 | 22  | 9  | 9  | 10 | 351 | 4.68  |

|                |                                                                                             |      |        |       |    |    |    |    |     |       |
|----------------|---------------------------------------------------------------------------------------------|------|--------|-------|----|----|----|----|-----|-------|
| WP_002890666.1 | cell division protein FtsA [ <i>Streptococcus</i> ]                                         | 49.9 | 445.39 | 36.90 | 23 | 12 | 12 | 16 | 458 | 4.75  |
| WP_002889882.1 | endolytic transglycosylase MltG [ <i>Streptococcus salivarius</i> ]                         | 72.9 | 444.40 | 20.52 | 77 | 12 | 12 | 14 | 658 | 5.90  |
| WP_002890886.1 | LCP family protein [ <i>Streptococcus salivarius</i> ]                                      | 53.6 | 443.65 | 26.13 | 64 | 10 | 10 | 11 | 486 | 8.62  |
| WP_002890667.1 | cell division protein FtsZ [ <i>Streptococcus salivarius</i> ]                              | 46.3 | 443.24 | 30.00 | 28 | 10 | 10 | 12 | 440 | 4.65  |
| WP_002891304.1 | M13 family metalloproteinase [ <i>Streptococcus salivarius</i> ]                            | 76.0 | 440.67 | 27.87 | 78 | 16 | 16 | 16 | 671 | 5.54  |
| MBS6733013.1   | LTA synthase family protein [ <i>Streptococcus salivarius</i> ]                             | 66.9 | 438.80 | 23.70 | 68 | 14 | 14 | 15 | 595 | 6.00  |
| MBS6732046.1   | glucose-1-phosphate adenyltransferase [ <i>Streptococcus salivarius</i> ]                   | 41.6 | 435.47 | 25.53 | 40 | 8  | 8  | 9  | 380 | 4.92  |
| WP_247914992.1 | ABC transporter permease, partial [ <i>Streptococcus salivarius</i> ]                       | 60.7 | 434.65 | 22.38 | 65 | 11 | 11 | 12 | 572 | 7.06  |
| WP_002891489.1 | amino acid ABC transporter ATP-binding protein [ <i>Streptococcus</i> ]                     | 27.1 | 431.28 | 28.46 | 23 | 5  | 6  | 14 | 246 | 4.86  |
| WP_002886286.1 | ribose-phosphate diphosphokinase [ <i>Streptococcus</i> ]                                   | 35.1 | 429.38 | 24.92 | 15 | 6  | 6  | 10 | 321 | 5.67  |
| WP_002884894.1 | capsular polysaccharide biosynthesis protein [ <i>Streptococcus</i> ]                       | 25.5 | 428.62 | 37.39 | 19 | 8  | 8  | 10 | 230 | 5.36  |
| MBS5247515.1   | cell division protein FtsZ [ <i>Streptococcus salivarius</i> ]                              | 35.9 | 414.83 | 46.36 | 1  | 10 | 10 | 10 | 343 | 4.74  |
| WP_002890189.1 | aminoacyltransferase [ <i>Streptococcus salivarius</i> ]                                    | 45.2 | 407.90 | 27.62 | 57 | 11 | 11 | 12 | 391 | 8.84  |
| WP_002886374.1 | 50S ribosomal protein L13 [ <i>Streptococcus</i> ]                                          | 16.2 | 407.28 | 52.03 | 10 | 6  | 6  | 13 | 148 | 9.91  |
| WP_002889851.1 | aminopeptidase C [ <i>Streptococcus</i> ]                                                   | 50.3 | 405.85 | 37.75 | 69 | 15 | 15 | 16 | 445 | 5.03  |
| WP_002890570.1 | YtxH domain-containing protein [ <i>Streptococcus</i> ]                                     | 16.1 | 404.69 | 60.27 | 24 | 2  | 9  | 14 | 146 | 4.60  |
| MBS5246263.1   | metal ABC transporter ATP-binding protein [ <i>Streptococcus salivarius</i> ]               | 27.1 | 400.77 | 33.88 | 36 | 7  | 7  | 10 | 242 | 8.66  |
| WP_002891173.1 | class A sortase [ <i>Streptococcus salivarius</i> ]                                         | 28.0 | 390.24 | 25.30 | 37 | 5  | 5  | 7  | 253 | 8.68  |
| WP_257214045.1 | hypothetical protein [ <i>Streptococcus salivarius</i> ]                                    | 22.4 | 390.06 | 39.00 | 10 | 7  | 7  | 8  | 200 | 9.03  |
| WP_002886343.1 | translation elongation factor Ts [ <i>Streptococcus</i> ]                                   | 37.3 | 386.80 | 31.79 | 12 | 9  | 9  | 10 | 346 | 4.86  |
| WP_155124383.1 | PDZ domain-containing protein [ <i>Streptococcus salivarius</i> ]                           | 36.6 | 385.62 | 31.07 | 78 | 9  | 9  | 11 | 338 | 7.21  |
| MBS6731602.1   | 30S ribosome-binding factor RbfA [ <i>Streptococcus salivarius</i> ]                        | 13.5 | 384.58 | 41.03 | 10 | 6  | 6  | 11 | 117 | 8.85  |
| WP_037597852.1 | (S)-acetoin forming diacetyl reductase [ <i>Streptococcus salivarius</i> ]                  | 26.4 | 378.01 | 34.65 | 29 | 8  | 8  | 9  | 254 | 5.15  |
| MBS6890062.1   | tyrosine-protein kinase [ <i>Streptococcus salivarius</i> ]                                 | 26.8 | 377.64 | 36.99 | 33 | 8  | 8  | 10 | 246 | 8.98  |
| MBS4923624.1   | glucose-6-phosphate isomerase [ <i>Streptococcus salivarius</i> ]                           | 49.9 | 377.12 | 23.83 | 29 | 10 | 10 | 11 | 449 | 4.98  |
| MCB6443278.1   | 50S ribosomal protein L5 [ <i>Streptococcus salivarius</i> ]                                | 9.5  | 375.47 | 23.17 | 1  | 1  | 2  | 11 | 82  | 5.52  |
| WP_002885711.1 | 50S ribosomal protein L14 [ <i>Streptococcus</i> ]                                          | 13.1 | 375.43 | 38.52 | 43 | 6  | 6  | 11 | 122 | 10.27 |
| MBS6732724.1   | DUF3862 domain-containing protein [ <i>Streptococcus salivarius</i> ]                       | 22.3 | 375.05 | 47.57 | 28 | 9  | 9  | 9  | 206 | 8.98  |
| WP_002892304.1 | hypothetical protein [ <i>Streptococcus salivarius</i> ]                                    | 19.6 | 374.17 | 37.23 | 62 | 2  | 5  | 6  | 188 | 6.00  |
| WP_002883717.1 | PTS system mannose/fructose/sorbose family transporter subunit IID [ <i>Streptococcus</i> ] | 33.4 | 373.11 | 20.13 | 20 | 7  | 7  | 12 | 303 | 9.22  |
| MBS6890701.1   | 6-phosphofructokinase [ <i>Streptococcus salivarius</i> ]                                   | 35.7 | 373.10 | 29.79 | 32 | 9  | 9  | 10 | 339 | 5.14  |
| WP_002883786.1 | ribosome-associated translation inhibitor RaiA [ <i>Streptococcus</i> ]                     | 21.0 | 370.81 | 43.96 | 9  | 7  | 7  | 8  | 182 | 5.19  |
| MBS4922978.1   | phenylalanine--tRNA ligase subunit alpha [ <i>Streptococcus salivarius</i> ]                | 39.2 | 367.95 | 30.26 | 45 | 10 | 10 | 11 | 347 | 5.74  |
| WP_037597789.1 | FTR1 family iron permease [ <i>Streptococcus salivarius</i> ]                               | 61.7 | 365.23 | 16.76 | 96 | 9  | 9  | 10 | 561 | 7.66  |
| WP_002891100.1 | C69 family dipeptidase [ <i>Streptococcus</i> ]                                             | 52.7 | 359.39 | 21.29 | 56 | 1  | 10 | 11 | 465 | 5.03  |
| WP_002890539.1 | alpha-ketoacid dehydrogenase subunit beta [ <i>Streptococcus</i> ]                          | 37.3 | 353.68 | 39.07 | 21 | 12 | 12 | 12 | 343 | 4.98  |
| WP_037597419.1 | methionine ABC transporter ATP-binding protein [ <i>Streptococcus salivarius</i> ]          | 38.6 | 352.90 | 31.27 | 46 | 9  | 9  | 10 | 355 | 5.83  |

|                |                                                                                                                                                         |       |        |       |     |    |    |    |      |       |
|----------------|---------------------------------------------------------------------------------------------------------------------------------------------------------|-------|--------|-------|-----|----|----|----|------|-------|
| WP_073922275.1 | phosphate signaling complex protein PhoU, partial [ <i>Streptococcus salivarius</i> ]                                                                   | 24.7  | 346.97 | 39.35 | 27  | 8  | 8  | 9  | 216  | 5.22  |
| MBF1717846.1   | catabolite control protein A [ <i>Streptococcus salivarius</i> ]                                                                                        | 36.7  | 342.86 | 26.73 | 32  | 8  | 8  | 8  | 333  | 5.77  |
| WP_002887063.1 | 50S ribosomal protein L22 [ <i>Streptococcus</i> ]                                                                                                      | 12.4  | 342.13 | 40.35 | 5   | 5  | 5  | 8  | 114  | 11.02 |
| CCB96062.1     | penicillin-binding protein 2X [ <i>Streptococcus salivarius</i> JIM8777]                                                                                | 78.4  | 341.86 | 15.10 | 79  | 11 | 11 | 12 | 722  | 5.43  |
| MBS7053832.1   | 1,4-alpha-glucan branching protein GlgB [ <i>Streptococcus salivarius</i> ]                                                                             | 73.3  | 340.48 | 15.18 | 50  | 10 | 10 | 12 | 626  | 5.44  |
| WP_214252643.1 | GBS Bsp-like repeat-containing protein [ <i>Streptococcus salivarius</i> ]                                                                              | 130.6 | 338.63 | 7.89  | 181 | 0  | 10 | 10 | 1204 | 7.01  |
| MBS4823153.1   | hypothetical protein [ <i>Streptococcus salivarius</i> ]                                                                                                | 41.2  | 337.40 | 25.14 | 45  | 8  | 8  | 8  | 358  | 5.30  |
| WP_231605992.1 | Ig-like domain-containing protein [ <i>Streptococcus salivarius</i> ]                                                                                   | 129.4 | 336.56 | 53.20 | 53  | 1  | 8  | 10 | 1312 | 4.54  |
| HBJ24369.1     | UDP-N-acetylglucosamine--N-acetylmuramyl-(pentapeptide) pyrophosphoryl-undecaprenol N-acetylglucosamine transferase [ <i>Streptococcus salivarius</i> ] | 39.6  | 331.75 | 26.69 | 55  | 7  | 7  | 9  | 356  | 8.16  |
| MBS4924066.1   | homoserine dehydrogenase [ <i>Streptococcus salivarius</i> ]                                                                                            | 40.5  | 328.58 | 25.47 | 28  | 7  | 7  | 8  | 373  | 4.89  |
| WP_195917845.1 | hypothetical protein [ <i>Streptococcus salivarius</i> ]                                                                                                | 20.1  | 325.18 | 42.70 | 8   | 6  | 6  | 9  | 185  | 4.94  |
| WP_002889557.1 | rod shape-determining protein MreC [ <i>Streptococcus salivarius</i> ]                                                                                  | 30.3  | 324.59 | 25.00 | 40  | 5  | 5  | 6  | 276  | 7.24  |
| WP_008535049.1 | hypothetical protein [ <i>Streptococcus</i> ]                                                                                                           | 21.9  | 311.99 | 34.95 | 6   | 5  | 5  | 7  | 186  | 6.11  |
| MBS4924105.1   | 3-oxoacyl-[acyl-carrier-protein] reductase [ <i>Streptococcus salivarius</i> ]                                                                          | 25.8  | 310.90 | 33.20 | 22  | 7  | 7  | 8  | 244  | 5.48  |
| WP_002890254.1 | bifunctional pyr operon transcriptional regulator/uracil phosphoribosyltransferase PyrR [ <i>Streptococcus</i> ]                                        | 19.5  | 309.20 | 35.26 | 10  | 6  | 6  | 7  | 173  | 5.24  |
| AIY21692.1     | dihydroxy-acid dehydratase [ <i>Streptococcus salivarius</i> ]                                                                                          | 59.8  | 307.06 | 15.17 | 54  | 8  | 8  | 8  | 567  | 5.12  |
| WP_002883723.1 | ABC transporter ATP-binding protein [ <i>Streptococcus</i> ]                                                                                            | 27.8  | 306.00 | 33.46 | 23  | 9  | 9  | 12 | 254  | 5.14  |
| WP_095559509.1 | amino acid ABC transporter permease [ <i>Streptococcus</i> ]                                                                                            | 27.0  | 305.99 | 22.98 | 38  | 5  | 5  | 6  | 248  | 8.29  |
| WP_002887505.1 | 50S ribosomal protein L4 [ <i>Streptococcus</i> ]                                                                                                       | 22.2  | 303.79 | 39.13 | 5   | 1  | 7  | 9  | 207  | 9.85  |
| MBS7215085.1   | hypothetical protein [ <i>Streptococcus salivarius</i> ]                                                                                                | 18.0  | 302.81 | 45.91 | 14  | 8  | 8  | 11 | 159  | 8.98  |
| HBJ22629.1     | ATP synthase F0 subunit B [ <i>Streptococcus salivarius</i> ]                                                                                           | 18.0  | 302.48 | 43.03 | 13  | 7  | 7  | 8  | 165  | 5.05  |
| WP_037598539.1 | PTS system trehalose-specific EIIBC component [ <i>Streptococcus salivarius</i> ]                                                                       | 70.5  | 300.11 | 14.87 | 58  | 9  | 9  | 12 | 659  | 5.29  |
| WP_247914929.1 | DUF421 domain-containing protein, partial [ <i>Streptococcus salivarius</i> ]                                                                           | 18.4  | 298.15 | 43.29 | 41  | 5  | 5  | 6  | 164  | 5.30  |
| MBS6120303.1   | FAD-dependent oxidoreductase [ <i>Streptococcus salivarius</i> ]                                                                                        | 30.0  | 297.99 | 28.32 | 64  | 6  | 6  | 7  | 279  | 5.73  |
| WP_002892324.1 | SAP domain-containing protein [ <i>Streptococcus</i> ]                                                                                                  | 25.1  | 293.40 | 38.97 | 1   | 7  | 7  | 8  | 213  | 9.36  |
| WP_002890102.1 | ABC transporter ATP-binding protein/permease [ <i>Streptococcus salivarius</i> ]                                                                        | 67.0  | 293.18 | 18.21 | 80  | 8  | 8  | 9  | 604  | 6.10  |
| WP_004182597.1 | signal peptidase I [ <i>Streptococcus salivarius</i> ]                                                                                                  | 20.9  | 292.30 | 43.24 | 20  | 7  | 8  | 11 | 185  | 8.24  |
| WP_002889798.1 | preprotein translocase subunit YajC [ <i>Streptococcus</i> ]                                                                                            | 12.3  | 291.46 | 53.57 | 25  | 6  | 6  | 10 | 112  | 4.64  |
| WP_002892057.1 | hypothetical protein [ <i>Streptococcus salivarius</i> ]                                                                                                | 36.0  | 291.36 | 28.31 | 50  | 9  | 9  | 9  | 325  | 8.51  |
| WP_002890526.1 | DUF4300 family protein [ <i>Streptococcus salivarius</i> ]                                                                                              | 31.5  | 284.21 | 18.64 | 76  | 6  | 6  | 8  | 279  | 7.23  |
| MBS4822285.1   | signal peptidase I [ <i>Streptococcus salivarius</i> ]                                                                                                  | 24.1  | 284.04 | 31.88 | 35  | 8  | 8  | 10 | 207  | 9.06  |
| MBS4923069.1   | alcohol dehydrogenase AdhP [ <i>Streptococcus salivarius</i> ]                                                                                          | 35.7  | 280.33 | 22.71 | 50  | 6  | 6  | 7  | 339  | 5.12  |
| WP_002886110.1 | 50S ribosomal protein L7/L12 [ <i>Streptococcus</i> ]                                                                                                   | 12.3  | 278.78 | 79.51 | 19  | 8  | 8  | 9  | 122  | 4.53  |
| WP_201710952.1 | ribonuclease J, partial [ <i>Streptococcus salivarius</i> ]                                                                                             | 37.2  | 278.46 | 20.06 | 51  | 6  | 6  | 7  | 334  | 9.06  |

|                |                                                                                                 |      |        |       |    |    |    |    |     |       |
|----------------|-------------------------------------------------------------------------------------------------|------|--------|-------|----|----|----|----|-----|-------|
| MBS6530985.1   | class 1b ribonucleoside-diphosphate reductase subunit alpha [ <i>Streptococcus salivarius</i> ] | 81.5 | 273.38 | 14.46 | 33 | 10 | 10 | 11 | 719 | 5.49  |
| WP_002885597.1 | 50S ribosomal protein L21 [ <i>Streptococcus</i> ]                                              | 11.2 | 271.99 | 41.35 | 6  | 4  | 4  | 7  | 104 | 9.86  |
| WP_049544183.1 | 50S ribosomal protein L20, partial [ <i>Streptococcus salivarius</i> ]                          | 10.3 | 271.90 | 46.67 | 14 | 4  | 4  | 6  | 90  | 10.24 |
| WP_002889684.1 | LPKTxAVK-anchored surface protein [ <i>Streptococcus</i> ]                                      | 14.2 | 270.57 | 37.96 | 10 | 4  | 4  | 6  | 137 | 6.01  |
| WP_002895436.1 | L-lactate dehydrogenase [ <i>Streptococcus</i> ]                                                | 35.3 | 263.86 | 17.68 | 1  | 1  | 7  | 9  | 328 | 5.30  |
| WP_002891009.1 | iron-siderophore ABC transporter substrate-binding protein [ <i>Streptococcus salivarius</i> ]  | 36.8 | 260.32 | 21.74 | 75 | 5  | 5  | 6  | 322 | 5.00  |
| MBS7214219.1   | universal stress protein [ <i>Streptococcus salivarius</i> ]                                    | 16.5 | 260.06 | 40.82 | 6  | 6  | 6  | 6  | 147 | 5.60  |
| WP_002885849.1 | 50S ribosomal protein L15 [ <i>Streptococcus</i> ]                                              | 15.4 | 258.45 | 43.15 | 12 | 5  | 5  | 8  | 146 | 10.49 |
| MBS7055454.1   | hypothetical protein [ <i>Streptococcus salivarius</i> ]                                        | 7.6  | 257.85 | 21.13 | 39 | 2  | 2  | 6  | 71  | 4.88  |
| MBS7215169.1   | penicillin-binding protein PBP1B [ <i>Streptococcus salivarius</i> ]                            | 77.0 | 257.14 | 10.69 | 94 | 7  | 7  | 8  | 711 | 5.49  |
| WP_037597754.1 | ribose-5-phosphate isomerase RpiA [ <i>Streptococcus salivarius</i> ]                           | 24.3 | 248.59 | 38.05 | 31 | 8  | 8  | 9  | 226 | 5.07  |
| WP_002884509.1 | phosphate acetyltransferase [ <i>Streptococcus salivarius</i> ]                                 | 35.4 | 243.87 | 25.99 | 62 | 7  | 7  | 9  | 327 | 5.49  |
| MBS6973411.1   | ATP-grasp domain-containing protein [ <i>Streptococcus salivarius</i> ]                         | 44.7 | 237.74 | 19.12 | 39 | 6  | 6  | 7  | 387 | 4.97  |
| HBJ23453.1     | acetolactate synthase AlsS [ <i>Streptococcus salivarius</i> ]                                  | 61.1 | 236.95 | 20.25 | 52 | 10 | 10 | 10 | 558 | 5.05  |
| MBF1719222.1   | 30S ribosomal protein S9 [ <i>Streptococcus salivarius</i> ]                                    | 13.7 | 236.18 | 28.57 | 8  | 5  | 5  | 9  | 126 | 10.49 |
| MBS5422532.1   | acetate kinase [ <i>Streptococcus salivarius</i> ]                                              | 43.2 | 235.24 | 24.94 | 30 | 8  | 8  | 9  | 397 | 5.08  |
| WP_002890017.1 | CBS domain-containing protein [ <i>Streptococcus</i> ]                                          | 24.1 | 233.52 | 28.31 | 35 | 6  | 6  | 6  | 219 | 4.97  |
| WP_247914978.1 | FtsQ-type POTRA domain-containing protein, partial [ <i>Streptococcus salivarius</i> ]          | 28.9 | 231.62 | 19.84 | 72 | 5  | 6  | 8  | 257 | 9.73  |
| WP_073686523.1 | serine hydroxymethyltransferase, partial [ <i>Streptococcus salivarius</i> ]                    | 40.0 | 231.35 | 27.35 | 55 | 9  | 9  | 9  | 373 | 5.90  |
| MBS6760324.1   | redox-regulated ATPase YchF [ <i>Streptococcus salivarius</i> ]                                 | 41.2 | 230.99 | 22.10 | 17 | 7  | 7  | 7  | 371 | 4.82  |
| MBS6119832.1   | 30S ribosomal protein S12 [ <i>Streptococcus salivarius</i> ]                                   | 14.9 | 230.17 | 25.19 | 3  | 5  | 5  | 6  | 135 | 11.66 |
| MBS5422237.1   | PepSY domain-containing protein [ <i>Streptococcus salivarius</i> ]                             | 22.0 | 225.25 | 34.63 | 61 | 4  | 4  | 5  | 205 | 5.43  |
| WP_002886432.1 | amino acid ABC transporter ATP-binding protein [ <i>Streptococcus</i> ]                         | 27.5 | 224.91 | 32.93 | 16 | 7  | 7  | 8  | 246 | 5.44  |
| WP_002885820.1 | 30S ribosomal protein S13 [ <i>Streptococcus</i> ]                                              | 13.4 | 223.80 | 47.11 | 5  | 8  | 8  | 10 | 121 | 10.52 |
| WP_002887048.1 | adenylate kinase [ <i>Streptococcus</i> ]                                                       | 23.5 | 220.25 | 33.96 | 25 | 5  | 5  | 5  | 212 | 4.86  |
| WP_002890205.1 | F0F1 ATP synthase subunit delta [ <i>Streptococcus</i> ]                                        | 20.3 | 220.25 | 27.53 | 26 | 5  | 5  | 8  | 178 | 4.97  |
| WP_002885763.1 | UTP--glucose-1-phosphate uridylyltransferase GalU [ <i>Streptococcus salivarius</i> ]           | 33.7 | 219.10 | 34.87 | 22 | 7  | 7  | 7  | 304 | 5.48  |
| WP_002891752.1 | DUF6287 domain-containing protein [ <i>Streptococcus salivarius</i> ]                           | 37.2 | 218.47 | 14.86 | 65 | 4  | 4  | 4  | 350 | 4.91  |
| WP_002883618.1 | 30S ribosomal protein S15 [ <i>Streptococcus</i> ]                                              | 10.5 | 218.39 | 30.34 | 6  | 4  | 4  | 10 | 89  | 10.13 |
| WP_037597274.1 | phosphoribosylformylglycinamide cyclo-ligase [ <i>Streptococcus salivarius</i> ]                | 36.4 | 218.12 | 13.53 | 34 | 4  | 4  | 4  | 340 | 4.86  |
| WP_002885567.1 | ribosome recycling factor [ <i>Streptococcus</i> ]                                              | 20.5 | 217.55 | 29.73 | 10 | 5  | 5  | 6  | 185 | 5.80  |
| MBS7056032.1   | 30S ribosomal protein S19 [ <i>Streptococcus salivarius</i> ]                                   | 10.6 | 214.71 | 35.87 | 7  | 4  | 4  | 9  | 92  | 10.04 |
| WP_002885874.1 | 50S ribosomal protein L24 [ <i>Streptococcus</i> ]                                              | 10.8 | 214.38 | 47.52 | 4  | 4  | 4  | 6  | 101 | 9.91  |
| WP_002883489.1 | 50S ribosomal protein L19 [ <i>Streptococcus</i> ]                                              | 13.2 | 213.80 | 48.70 | 4  | 6  | 6  | 10 | 115 | 10.78 |
| WP_002885729.1 | 50S ribosomal protein L9 [ <i>Streptococcus</i> ]                                               | 17.0 | 211.84 | 36.84 | 7  | 6  | 6  | 7  | 152 | 9.54  |



|                |                                                                                                       |      |        |       |    |   |   |   |     |       |
|----------------|-------------------------------------------------------------------------------------------------------|------|--------|-------|----|---|---|---|-----|-------|
| MBS6973123.1   | trigger factor [ <i>Streptococcus salivarius</i> ]                                                    | 46.6 | 211.68 | 15.69 | 33 | 6 | 6 | 7 | 427 | 4.51  |
| MBS6119899.1   | ABC transporter ATP-binding protein [ <i>Streptococcus salivarius</i> ]                               | 44.9 | 210.87 | 18.20 | 21 | 6 | 6 | 7 | 401 | 5.01  |
| WP_247916114.1 | DUF5067 domain-containing protein, partial [ <i>Streptococcus salivarius</i> ]                        | 16.7 | 209.98 | 33.78 | 36 | 5 | 5 | 5 | 148 | 6.60  |
| WP_002891590.1 | ABC transporter ATP-binding protein [ <i>Streptococcus</i> ]                                          | 27.0 | 209.77 | 25.00 | 6  | 5 | 5 | 5 | 244 | 7.78  |
| MBS6973149.1   | Fe-S cluster assembly protein SufD [ <i>Streptococcus salivarius</i> ]                                | 45.9 | 209.21 | 25.00 | 39 | 9 | 9 | 9 | 420 | 5.02  |
| MBS6319368.1   | CapA family protein [ <i>Streptococcus salivarius</i> ]                                               | 45.6 | 208.86 | 17.28 | 59 | 6 | 6 | 6 | 405 | 5.63  |
| WP_002892198.1 | tryptophan--tRNA ligase [ <i>Streptococcus salivarius</i> ]                                           | 38.3 | 203.28 | 23.24 | 32 | 6 | 6 | 6 | 340 | 5.74  |
| MBS6530565.1   | hypothetical protein [ <i>Streptococcus salivarius</i> ]                                              | 14.5 | 202.34 | 31.78 | 6  | 4 | 4 | 4 | 129 | 4.94  |
| WP_247922426.1 | C69 family dipeptidase, partial [ <i>Streptococcus salivarius</i> ]                                   | 30.7 | 201.31 | 19.55 | 2  | 1 | 6 | 7 | 266 | 6.28  |
| AEJ52454.1     | signaling protein [ <i>Streptococcus salivarius</i> 57.I]                                             | 68.2 | 195.43 | 7.35  | 38 | 4 | 4 | 4 | 612 | 5.15  |
| MBS7054012.1   | DEAD/DEAH box helicase [ <i>Streptococcus salivarius</i> ]                                            | 58.5 | 195.11 | 11.30 | 48 | 6 | 6 | 6 | 522 | 9.60  |
| HBJ22662.1     | oligoendopeptidase F [ <i>Streptococcus salivarius</i> ]                                              | 69.0 | 194.97 | 7.65  | 49 | 3 | 3 | 3 | 601 | 4.91  |
| HBJ24030.1     | butanediol dehydrogenase [ <i>Streptococcus salivarius</i> ]                                          | 37.5 | 192.51 | 15.56 | 18 | 4 | 4 | 5 | 347 | 5.01  |
| WP_002885773.1 | 50S ribosomal protein L30 [ <i>Streptococcus</i> ]                                                    | 6.4  | 190.63 | 41.67 | 4  | 2 | 2 | 4 | 60  | 10.11 |
| WP_142236144.1 | Na/Pi cotransporter family protein, partial [ <i>Streptococcus salivarius</i> ]                       | 31.9 | 190.29 | 27.27 | 51 | 8 | 8 | 9 | 286 | 5.21  |
| MBS4923064.1   | amino acid ABC transporter ATP-binding protein [ <i>Streptococcus salivarius</i> ]                    | 23.3 | 186.98 | 22.49 | 31 | 4 | 4 | 4 | 209 | 5.59  |
| MBS7213534.1   | CHAP domain-containing protein [ <i>Streptococcus salivarius</i> ]                                    | 50.5 | 186.56 | 8.68  | 16 | 3 | 3 | 3 | 461 | 4.72  |
| WP_002885648.1 | 50S ribosomal protein L11 [ <i>Streptococcus</i> ]                                                    | 14.8 | 185.53 | 36.88 | 2  | 1 | 5 | 6 | 141 | 9.28  |
| WP_002884297.1 | DUF4230 domain-containing protein [ <i>Streptococcus</i> ]                                            | 22.4 | 185.15 | 35.64 | 14 | 6 | 6 | 6 | 202 | 8.97  |
| WP_002892302.1 | SH3 domain-containing protein [ <i>Streptococcus salivarius</i> ]                                     | 67.6 | 183.48 | 7.64  | 14 | 3 | 3 | 3 | 615 | 6.06  |
| WP_155214116.1 | dTDP-glucose 4,6-dehydratase, partial [ <i>Streptococcus salivarius</i> ]                             | 33.9 | 182.36 | 18.42 | 27 | 5 | 5 | 6 | 304 | 6.11  |
| WP_002885810.1 | 50S ribosomal protein L18 [ <i>Streptococcus</i> ]                                                    | 12.9 | 180.80 | 37.29 | 4  | 3 | 3 | 5 | 118 | 10.40 |
| AEJ52484.1     | aspartyl-tRNA synthetase [ <i>Streptococcus salivarius</i> 57.I]                                      | 65.3 | 180.71 | 11.23 | 58 | 5 | 5 | 5 | 579 | 4.97  |
| WP_230311018.1 | LPXTG cell wall anchor domain-containing protein, partial [ <i>Streptococcus salivarius</i> ]         | 80.9 | 180.17 | 4.25  | 7  | 1 | 2 | 2 | 776 | 4.58  |
| MBS4924007.1   | Asp-tRNA(Asn)/Glu-tRNA(Gln) amidotransferase subunit GatB [ <i>Streptococcus salivarius</i> ]         | 50.7 | 179.30 | 14.76 | 44 | 6 | 6 | 7 | 454 | 5.14  |
| WP_224111234.1 | accessory Sec-dependent serine-rich glycoprotein adhesin, partial [ <i>Streptococcus salivarius</i> ] | 65.5 | 177.55 | 6.36  | 19 | 3 | 3 | 4 | 629 | 8.06  |
| RGW04238.1     | Fe-S cluster assembly ATPase SufC [ <i>Streptococcus salivarius</i> ]                                 | 28.2 | 176.09 | 22.66 | 19 | 6 | 6 | 6 | 256 | 4.61  |
| MBS6732012.1   | M1 family metallopeptidase [ <i>Streptococcus salivarius</i> ]                                        | 96.1 | 172.44 | 7.92  | 93 | 6 | 6 | 6 | 846 | 4.72  |
| WP_247915120.1 | DeoD-type purine-nucleoside phosphorylase, partial [ <i>Streptococcus salivarius</i> ]                | 17.4 | 170.40 | 13.29 | 36 | 2 | 2 | 3 | 158 | 6.18  |
| MBS7055344.1   | hypothetical protein [ <i>Streptococcus salivarius</i> ]                                              | 42.5 | 164.83 | 18.80 | 85 | 8 | 8 | 8 | 367 | 6.90  |
| WP_247914609.1 | peptide chain release factor 3, partial [ <i>Streptococcus salivarius</i> ]                           | 57.2 | 163.63 | 11.09 | 27 | 4 | 4 | 4 | 505 | 5.07  |
| WP_002889980.1 | PTS mannose/fructose/sorbose transporter subunit IIC [ <i>Streptococcus</i> ]                         | 27.3 | 163.10 | 17.71 | 18 | 3 | 3 | 3 | 271 | 5.14  |
| CCB92703.1     | biotin carboxylase [ <i>Streptococcus salivarius</i> CCHSS3]                                          | 49.3 | 161.11 | 15.52 | 24 | 7 | 7 | 7 | 451 | 5.00  |
| WP_002885617.1 | NAD(P)H-dependent oxidoreductase [ <i>Streptococcus</i> ]                                             | 22.3 | 160.26 | 25.00 | 19 | 5 | 5 | 6 | 200 | 5.60  |
| MBS6530211.1   | ribosome assembly RNA-binding protein YhbY [ <i>Streptococcus salivarius</i> ]                        | 11.9 | 158.67 | 26.67 | 14 | 3 | 3 | 6 | 105 | 9.67  |

|                |                                                                                                               |      |        |       |    |   |   |   |     |       |
|----------------|---------------------------------------------------------------------------------------------------------------|------|--------|-------|----|---|---|---|-----|-------|
| MBS4922903.1   | GTPase Era [ <i>Streptococcus salivarius</i> ]                                                                | 34.2 | 157.05 | 13.71 | 23 | 4 | 4 | 5 | 299 | 6.47  |
| WP_002890971.1 | thiol peroxidase [ <i>Streptococcus salivarius</i> ]                                                          | 18.2 | 156.85 | 31.10 | 38 | 5 | 5 | 5 | 164 | 4.61  |
| AIY21333.1     | 50S ribosomal protein L31 type B [ <i>Streptococcus salivarius</i> ]                                          | 9.4  | 154.60 | 26.25 | 6  | 2 | 2 | 3 | 80  | 8.43  |
| MBS6733391.1   | 4-hydroxy-tetrahydronicotinate synthase [ <i>Streptococcus salivarius</i> ]                                   | 17.5 | 151.07 | 19.38 | 32 | 2 | 2 | 3 | 160 | 4.84  |
| MBS4822467.1   | asparagine--tRNA ligase [ <i>Streptococcus salivarius</i> ]                                                   | 50.9 | 149.68 | 10.04 | 32 | 5 | 5 | 5 | 448 | 5.06  |
| WP_037598512.1 | 2,3,4,5-tetrahydropyridine-2,6-dicarboxylate N-acetyltransferase [ <i>Streptococcus</i> ]                     | 24.1 | 149.30 | 16.81 | 22 | 4 | 4 | 5 | 232 | 4.89  |
| WP_002890242.1 | glycine--tRNA ligase subunit beta [ <i>Streptococcus salivarius</i> ]                                         | 74.4 | 148.13 | 8.41  | 88 | 5 | 5 | 5 | 678 | 4.77  |
| MBS6120684.1   | ATP-binding cassette domain-containing protein [ <i>Streptococcus salivarius</i> ]                            | 22.3 | 147.41 | 17.09 | 26 | 3 | 3 | 3 | 199 | 5.27  |
| MBS6531569.1   | lipocalin/fatty acid-binding family protein [ <i>Streptococcus salivarius</i> ]                               | 14.9 | 146.50 | 36.69 | 40 | 3 | 3 | 3 | 139 | 4.60  |
| WP_142236201.1 | 2,3-bisphosphoglycerate-dependent phosphoglycerate mutase, partial [ <i>Streptococcus salivarius</i> ]        | 10.2 | 146.47 | 55.56 | 7  | 1 | 5 | 6 | 90  | 4.78  |
| MBS4822949.1   | ABC transporter permease [ <i>Streptococcus salivarius</i> ]                                                  | 34.6 | 146.08 | 15.91 | 29 | 5 | 5 | 5 | 308 | 9.36  |
| WP_002890656.1 | DNA starvation/stationary phase protection protein [ <i>Streptococcus</i> ]                                   | 19.0 | 144.06 | 16.18 | 7  | 2 | 2 | 3 | 173 | 4.58  |
| WP_002889931.1 | cobalt transporter CbiM [ <i>Streptococcus salivarius</i> ]                                                   | 35.1 | 141.80 | 11.69 | 30 | 3 | 3 | 3 | 325 | 8.48  |
| WP_224111200.1 | hypothetical protein [ <i>Streptococcus salivarius</i> ]                                                      | 53.6 | 140.27 | 10.99 | 87 | 5 | 5 | 5 | 464 | 9.55  |
| WP_073690584.1 | DUF4300 family protein [ <i>Streptococcus salivarius</i> ]                                                    | 32.4 | 139.39 | 14.80 | 54 | 4 | 4 | 4 | 277 | 8.50  |
| KXU59230.1     | 30S ribosomal protein S11 [ <i>Streptococcus salivarius</i> ]                                                 | 12.3 | 137.63 | 29.66 | 6  | 3 | 3 | 3 | 118 | 10.42 |
| WP_173014721.1 | ABC transporter permease subunit, partial [ <i>Streptococcus salivarius</i> ]                                 | 20.6 | 137.33 | 32.28 | 77 | 3 | 3 | 4 | 189 | 7.12  |
| WP_247922559.1 | transcription termination factor NusA, partial [ <i>Streptococcus salivarius</i> ]                            | 28.7 | 137.28 | 20.88 | 30 | 5 | 5 | 5 | 249 | 5.08  |
| MBS6891385.1   | 16S rRNA (adenine(1518)-N(6)/adenine(1519)-N(6))-dimethyltransferase RsmA [ <i>Streptococcus salivarius</i> ] | 32.7 | 137.03 | 10.69 | 42 | 3 | 3 | 4 | 290 | 5.73  |
| WP_002886694.1 | MarR family transcriptional regulator [ <i>Streptococcus salivarius</i> ]                                     | 16.6 | 134.87 | 35.66 | 41 | 6 | 6 | 7 | 143 | 8.79  |
| WP_253184712.1 | LPXTG cell wall anchor domain-containing protein, partial [ <i>Streptococcus salivarius</i> ]                 | 67.6 | 134.87 | 6.43  | 22 | 2 | 2 | 2 | 638 | 4.74  |
| WP_002890025.1 | manganese-dependent inorganic pyrophosphatase [ <i>Streptococcus salivarius</i> ]                             | 33.7 | 134.84 | 16.45 | 51 | 4 | 4 | 4 | 310 | 4.51  |
| MBS5247019.1   | 2-oxo acid dehydrogenase subunit E2 [ <i>Streptococcus salivarius</i> ]                                       | 43.9 | 134.16 | 10.02 | 55 | 4 | 4 | 4 | 409 | 5.07  |
| HBJ23624.1     | zinc ABC transporter ATP-binding protein [ <i>Streptococcus salivarius</i> ]                                  | 22.9 | 134.07 | 9.95  | 15 | 3 | 3 | 3 | 201 | 9.52  |
| WP_247915004.1 | Fe-S cluster assembly protein SufB, partial [ <i>Streptococcus salivarius</i> ]                               | 45.1 | 131.76 | 10.67 | 17 | 4 | 4 | 4 | 403 | 5.07  |
| WP_000960950.1 | 50S ribosomal protein L16 [ <i>Streptococcus</i> ]                                                            | 15.4 | 129.63 | 18.98 | 6  | 3 | 3 | 5 | 137 | 10.65 |
| MBS6732077.1   | tRNA 2-thiouridine(34) synthase MnmA [ <i>Streptococcus salivarius</i> ]                                      | 41.7 | 129.53 | 9.92  | 36 | 3 | 3 | 3 | 373 | 5.43  |
| MBS7055411.1   | LysM domain-containing protein [ <i>Streptococcus salivarius</i> ]                                            | 30.4 | 128.32 | 9.93  | 70 | 3 | 3 | 3 | 282 | 4.97  |
| WP_155164685.1 | YpmS family protein [ <i>Streptococcus salivarius</i> ]                                                       | 19.6 | 127.63 | 18.54 | 50 | 3 | 3 | 3 | 178 | 9.50  |
| WP_002891651.1 | DUF536 domain-containing protein [ <i>Streptococcus salivarius</i> ]                                          | 20.5 | 127.26 | 19.10 | 5  | 3 | 3 | 3 | 178 | 4.89  |
| WP_002883695.1 | YneF family protein [ <i>Streptococcus</i> ]                                                                  | 9.4  | 125.94 | 34.94 | 6  | 3 | 3 | 5 | 83  | 10.13 |
| HBJ23662.1     | nicotinate phosphoribosyltransferase [ <i>Streptococcus salivarius</i> ]                                      | 54.4 | 125.60 | 10.54 | 59 | 4 | 4 | 4 | 484 | 5.25  |
| MBS7214966.1   | DEAD/DEAH box helicase [ <i>Streptococcus salivarius</i> ]                                                    | 36.8 | 124.16 | 6.79  | 16 | 1 | 1 | 1 | 324 | 6.90  |
| WP_004182179.1 | polyribonucleotide nucleotidyltransferase [ <i>Streptococcus salivarius</i> ]                                 | 80.9 | 122.96 | 6.21  | 67 | 4 | 4 | 4 | 741 | 5.07  |
| MBS5421813.1   | hypoxanthine phosphoribosyltransferase [ <i>Streptococcus salivarius</i> ]                                    | 20.5 | 120.62 | 12.22 | 12 | 2 | 2 | 2 | 180 | 4.89  |

|                |                                                                                                     |      |        |       |     |   |   |   |     |      |
|----------------|-----------------------------------------------------------------------------------------------------|------|--------|-------|-----|---|---|---|-----|------|
| WP_183137226.1 | DUF3290 family protein [ <i>Streptococcus salivarius</i> ]                                          | 16.9 | 120.42 | 16.78 | 38  | 2 | 2 | 2 | 149 | 8.76 |
| HBJ22714.1     | S-ribosylhomocysteine lyase [ <i>Streptococcus salivarius</i> ]                                     | 17.9 | 120.33 | 15.63 | 9   | 2 | 2 | 3 | 160 | 5.36 |
| WP_013990672.1 | cell division ATP-binding protein FtsE [ <i>Streptococcus</i> ]                                     | 26.0 | 120.22 | 21.30 | 11  | 5 | 5 | 5 | 230 | 8.97 |
| MBS6732344.1   | aquaporin family protein [ <i>Streptococcus salivarius</i> ]                                        | 30.9 | 119.85 | 7.64  | 26  | 2 | 2 | 2 | 288 | 6.32 |
| WP_002890047.1 | acetyl-CoA carboxylase, carboxyltransferase subunit beta [ <i>Streptococcus salivarius</i> ]        | 31.5 | 117.47 | 12.85 | 31  | 3 | 3 | 3 | 288 | 6.16 |
| WP_002890091.1 | 4-hydroxy-tetrahydrodipicolinate reductase [ <i>Streptococcus salivarius</i> ]                      | 27.7 | 116.25 | 14.51 | 30  | 3 | 3 | 4 | 255 | 5.12 |
| WP_226972865.1 | hypothetical protein [ <i>Streptococcus salivarius</i> ]                                            | 67.5 | 115.90 | 7.41  | 46  | 3 | 3 | 4 | 594 | 8.29 |
| MBS7215126.1   | histidine phosphatase family protein [ <i>Streptococcus salivarius</i> ]                            | 22.4 | 114.12 | 27.00 | 57  | 4 | 4 | 4 | 200 | 5.85 |
| WP_247914868.1 | UDP-N-acetylmuramate--L-alanine ligase, partial [ <i>Streptococcus salivarius</i> ]                 | 46.2 | 113.85 | 6.57  | 24  | 2 | 2 | 2 | 411 | 5.12 |
| MBS4823121.1   | superoxide dismutase SodA [ <i>Streptococcus salivarius</i> ]                                       | 14.6 | 111.55 | 26.72 | 24  | 3 | 3 | 3 | 131 | 5.02 |
| WP_037598735.1 | ParA family protein [ <i>Streptococcus</i> ]                                                        | 30.2 | 109.72 | 19.93 | 21  | 4 | 4 | 5 | 276 | 4.93 |
| WP_002889651.1 | DeoR/GlpR family DNA-binding transcription regulator [ <i>Streptococcus</i> ]                       | 28.5 | 109.29 | 10.59 | 4   | 2 | 2 | 2 | 255 | 6.27 |
| WP_002883757.1 | response regulator transcription factor [ <i>Streptococcus</i> ]                                    | 26.5 | 109.11 | 11.79 | 9   | 2 | 2 | 3 | 229 | 5.03 |
| MBS4823128.1   | GTP-binding protein [ <i>Streptococcus salivarius</i> ]                                             | 36.6 | 109.04 | 6.95  | 15  | 2 | 2 | 2 | 331 | 4.74 |
| RGW02771.1     | translation initiation factor IF-3 [ <i>Streptococcus salivarius</i> ]                              | 19.9 | 108.52 | 19.54 | 8   | 4 | 4 | 4 | 174 | 9.76 |
| MBS4822526.1   | Asp-tRNA(Asn)/Glu-tRNA(Gln) amidotransferase subunit GatA [ <i>Streptococcus salivarius</i> ]       | 52.0 | 107.48 | 8.40  | 68  | 3 | 3 | 3 | 488 | 4.93 |
| WP_002892202.1 | ATP-binding cassette domain-containing protein [ <i>Streptococcus salivarius</i> ]                  | 60.8 | 106.78 | 5.56  | 27  | 2 | 3 | 3 | 540 | 4.82 |
| MBS4821773.1   | carbamoyl phosphate synthase small subunit [ <i>Streptococcus salivarius</i> ]                      | 40.1 | 106.68 | 6.63  | 16  | 2 | 2 | 2 | 362 | 6.13 |
| WP_002884257.1 | ABC transporter ATP-binding protein [ <i>Streptococcus salivarius</i> ]                             | 27.5 | 105.93 | 13.99 | 30  | 3 | 3 | 3 | 243 | 5.11 |
| MBS7053853.1   | ATP-binding cassette domain-containing protein [ <i>Streptococcus salivarius</i> ]                  | 16.6 | 105.63 | 24.16 | 38  | 3 | 3 | 3 | 149 | 9.26 |
| MBS6885742.1   | CotH kinase family protein [ <i>Streptococcus salivarius</i> ]                                      | 56.0 | 104.60 | 8.09  | 59  | 4 | 4 | 4 | 482 | 5.68 |
| WP_002891470.1 | glucosyltransferase domain-containing protein [ <i>Streptococcus salivarius</i> ]                   | 56.0 | 104.45 | 8.35  | 1   | 4 | 4 | 4 | 491 | 9.22 |
| MBS5423292.1   | isoprenyl transferase [ <i>Streptococcus salivarius</i> ]                                           | 28.5 | 103.35 | 16.06 | 17  | 4 | 4 | 4 | 249 | 8.68 |
| MBS6891548.1   | DUF1129 domain-containing protein [ <i>Streptococcus salivarius</i> ]                               | 25.1 | 103.08 | 13.00 | 10  | 2 | 2 | 4 | 223 | 9.25 |
| WP_073688941.1 | membrane protein insertase YidC, partial [ <i>Streptococcus salivarius</i> ]                        | 24.3 | 102.88 | 10.14 | 49  | 2 | 2 | 2 | 217 | 9.54 |
| MBS5181398.1   | DUF1958 domain-containing protein [ <i>Streptococcus salivarius</i> ]                               | 31.0 | 101.89 | 14.23 | 103 | 3 | 3 | 3 | 274 | 9.54 |
| AEJ53725.1     | TIGR03943 family protein [ <i>Streptococcus salivarius</i> 57.I]                                    | 29.0 | 98.72  | 9.34  | 39  | 2 | 2 | 2 | 257 | 7.52 |
| MBS4822645.1   | nucleoside-triphosphate diphosphatase [ <i>Streptococcus salivarius</i> ]                           | 35.7 | 98.63  | 8.02  | 42  | 2 | 2 | 2 | 324 | 5.00 |
| WP_247915125.1 | YebC/PmpR family DNA-binding transcriptional regulator, partial [ <i>Streptococcus salivarius</i> ] | 23.7 | 98.41  | 11.01 | 12  | 2 | 2 | 2 | 218 | 4.40 |
| WP_247922917.1 | preprotein translocase subunit SecY, partial [ <i>Streptococcus salivarius</i> ]                    | 34.0 | 98.32  | 11.86 | 14  | 3 | 3 | 3 | 312 | 9.14 |
| MBS6319787.1   | IMP dehydrogenase [ <i>Streptococcus salivarius</i> ]                                               | 48.0 | 98.21  | 6.90  | 17  | 3 | 3 | 3 | 449 | 5.92 |
| AEJ52639.1     | pur operon repressor PurR [ <i>Streptococcus salivarius</i> 57.I]                                   | 28.5 | 98.20  | 7.60  | 14  | 2 | 2 | 2 | 263 | 5.10 |
| WP_002890707.1 | dTDP-4-dehydrorhamnose 3,5-epimerase family protein [ <i>Streptococcus salivarius</i> ]             | 22.4 | 97.19  | 18.27 | 32  | 3 | 3 | 3 | 197 | 5.03 |

|                |                                                                                               |       |       |       |     |   |   |   |      |       |
|----------------|-----------------------------------------------------------------------------------------------|-------|-------|-------|-----|---|---|---|------|-------|
| WP_247914782.1 | 50S ribosomal protein L35, partial [ <i>Streptococcus salivarius</i> ]                        | 6.7   | 96.89 | 32.14 | 2   | 3 | 3 | 5 | 56   | 12.60 |
| WP_002894312.1 | ATP-dependent zinc metalloprotease FtsH [ <i>Streptococcus</i> ]                              | 72.5  | 95.78 | 7.13  | 1   | 2 | 5 | 6 | 659  | 5.52  |
| WP_223896427.1 | hypothetical protein [ <i>Streptococcus salivarius</i> ]                                      | 32.8  | 94.62 | 9.22  | 115 | 2 | 2 | 2 | 282  | 4.96  |
| MBS6760764.1   | 30S ribosomal protein S18 [ <i>Streptococcus salivarius</i> ]                                 | 9.3   | 91.84 | 29.11 | 4   | 4 | 4 | 4 | 79   | 10.64 |
| MBS7213645.1   | acetyltransferase [ <i>Streptococcus salivarius</i> ]                                         | 20.4  | 91.39 | 14.36 | 49  | 2 | 2 | 2 | 188  | 8.21  |
| MBS7214491.1   | peptidase [ <i>Streptococcus salivarius</i> ]                                                 | 29.5  | 87.39 | 9.56  | 92  | 2 | 2 | 2 | 293  | 4.93  |
| WP_002883686.1 | rRNA pseudouridine synthase [ <i>Streptococcus</i> ]                                          | 27.3  | 86.96 | 5.39  | 9   | 1 | 1 | 1 | 241  | 9.91  |
| WP_002262412.1 | 50S ribosomal protein L33 [ <i>Streptococcus</i> ]                                            | 5.9   | 86.88 | 44.90 | 7   | 3 | 3 | 3 | 49   | 10.35 |
| MBS7054683.1   | phospho-N-acetylmuramoyl-pentapeptide-transferase [ <i>Streptococcus salivarius</i> ]         | 5.3   | 86.51 | 22.92 | 38  | 1 | 1 | 1 | 48   | 9.61  |
| WP_002885786.1 | 50S ribosomal protein L28 [ <i>Streptococcus</i> ]                                            | 6.9   | 86.31 | 30.65 | 3   | 3 | 3 | 3 | 62   | 11.21 |
| WP_201709461.1 | isoleucine--tRNA ligase [ <i>Streptococcus salivarius</i> ]                                   | 105.8 | 83.55 | 4.61  | 87  | 4 | 4 | 4 | 932  | 4.97  |
| WP_207185315.1 | membrane protein insertase YidC [ <i>Streptococcus salivarius</i> ]                           | 33.2  | 83.40 | 6.78  | 6   | 3 | 3 | 4 | 295  | 10.02 |
| MBS5180676.1   | DUF3042 family protein [ <i>Streptococcus salivarius</i> ]                                    | 3.8   | 82.55 | 28.13 | 5   | 2 | 2 | 4 | 32   | 10.61 |
| WP_002884235.1 | PH domain-containing protein [ <i>Streptococcus salivarius</i> ]                              | 14.1  | 81.84 | 34.92 | 19  | 4 | 4 | 4 | 126  | 5.55  |
| MBS7214878.1   | inositol monophosphatase family protein [ <i>Streptococcus salivarius</i> ]                   | 6.1   | 81.37 | 22.22 | 41  | 1 | 1 | 1 | 54   | 5.01  |
| WP_038676984.1 | phage holin [ <i>Streptococcus salivarius</i> ]                                               | 8.5   | 80.71 | 10.53 | 2   | 1 | 1 | 2 | 76   | 7.25  |
| WP_247914817.1 | ABC transporter permease subunit, partial [ <i>Streptococcus salivarius</i> ]                 | 20.2  | 80.71 | 12.23 | 9   | 2 | 2 | 2 | 188  | 9.31  |
| WP_002886340.1 | alkyl hydroperoxide reductase subunit C [ <i>Streptococcus</i> ]                              | 20.5  | 80.58 | 12.90 | 21  | 3 | 3 | 3 | 186  | 4.70  |
| WP_002891688.1 | hypothetical protein [ <i>Streptococcus</i> ]                                                 | 29.1  | 78.91 | 11.60 | 32  | 3 | 3 | 3 | 250  | 5.21  |
| WP_002883992.1 | glucose-1-phosphate thymidyltransferase RfbA [ <i>Streptococcus</i> ]                         | 32.0  | 77.87 | 11.07 | 13  | 3 | 3 | 3 | 289  | 4.78  |
| WP_073922228.1 | ABC transporter ATP-binding protein, partial [ <i>Streptococcus salivarius</i> ]              | 24.8  | 77.53 | 6.28  | 39  | 1 | 1 | 1 | 223  | 7.20  |
| WP_002889668.1 | tagatose-bisphosphate aldolase [ <i>Streptococcus</i> ]                                       | 36.5  | 76.70 | 7.06  | 4   | 2 | 2 | 2 | 326  | 4.84  |
| WP_002892326.1 | non-ribosomal peptide synthetase [ <i>Streptococcus salivarius</i> ]                          | 210.8 | 76.68 | 1.19  | 2   | 2 | 2 | 2 | 1856 | 5.17  |
| ARC49259.1     | UDP-N-acetylmuramate dehydrogenase [ <i>Streptococcus salivarius</i> ]                        | 33.1  | 75.79 | 7.00  | 54  | 2 | 2 | 2 | 300  | 6.57  |
| WP_073922347.1 | ABC transporter permease, partial [ <i>Streptococcus salivarius</i> ]                         | 34.8  | 74.06 | 4.85  | 32  | 2 | 2 | 3 | 330  | 8.69  |
| AEJ52905.1     | spermidine/putrescine import ATP-binding protein PotA [ <i>Streptococcus salivarius</i> 57.I] | 42.4  | 72.53 | 5.66  | 16  | 2 | 2 | 2 | 371  | 4.65  |
| WP_002892335.1 | ACP S-malonyltransferase [ <i>Streptococcus</i> ]                                             | 32.7  | 72.19 | 5.72  | 1   | 2 | 2 | 2 | 297  | 4.91  |
| WP_064524928.1 | transcriptional regulator NrdR [ <i>Streptococcus salivarius</i> ]                            | 18.3  | 71.83 | 13.92 | 10  | 2 | 2 | 2 | 158  | 6.79  |
| WP_064526629.1 | 3-hydroxyacyl-ACP dehydratase FabZ, partial [ <i>Streptococcus salivarius</i> ]               | 14.1  | 71.72 | 33.07 | 3   | 4 | 4 | 4 | 127  | 7.40  |
| MBS7214705.1   | YbbR-like domain-containing protein [ <i>Streptococcus salivarius</i> ]                       | 23.7  | 69.90 | 12.89 | 45  | 2 | 2 | 2 | 225  | 8.25  |
| WP_247922456.1 | Hsp70 family protein, partial [ <i>Streptococcus salivarius</i> ]                             | 37.3  | 69.81 | 10.45 | 27  | 3 | 3 | 3 | 335  | 5.25  |
| WP_195187947.1 | formate/nitrite transporter family protein, partial [ <i>Streptococcus salivarius</i> ]       | 27.5  | 68.79 | 8.06  | 51  | 2 | 2 | 2 | 248  | 8.25  |
| MBS5423388.1   | amino acid ABC transporter permease [ <i>Streptococcus salivarius</i> ]                       | 22.3  | 68.25 | 8.46  | 11  | 2 | 2 | 2 | 201  | 9.07  |
| HBJ22709.1     | glutathione-disulfide reductase [ <i>Streptococcus salivarius</i> ]                           | 48.7  | 67.58 | 4.22  | 66  | 2 | 2 | 3 | 450  | 5.62  |
| MBS7215167.1   | Rrf2 family transcriptional regulator [ <i>Streptococcus salivarius</i> ]                     | 16.0  | 67.55 | 8.05  | 12  | 1 | 1 | 1 | 149  | 9.01  |
| WP_155213791.1 | aldo/keto reductase, partial [ <i>Streptococcus salivarius</i> ]                              | 31.5  | 67.07 | 8.19  | 78  | 2 | 2 | 2 | 281  | 6.04  |

|                |                                                                                             |      |       |       |    |   |   |   |     |       |
|----------------|---------------------------------------------------------------------------------------------|------|-------|-------|----|---|---|---|-----|-------|
| WP_247922777.1 | GTP-binding protein, partial [ <i>Streptococcus salivarius</i> ]                            | 20.8 | 66.74 | 5.32  | 38 | 1 | 1 | 1 | 188 | 4.55  |
| MBS4923571.1   | DNA-directed RNA polymerase subunit omega [ <i>Streptococcus salivarius</i> ]               | 11.2 | 66.66 | 26.00 | 10 | 3 | 3 | 4 | 100 | 6.57  |
| MBS7213687.1   | PTS mannose/fructose/sorbose transporter subunit IIC [ <i>Streptococcus salivarius</i> ]    | 27.3 | 66.64 | 4.14  | 5  | 1 | 1 | 1 | 266 | 4.70  |
| MBS4823607.1   | BCCT family transporter [ <i>Streptococcus salivarius</i> ]                                 | 44.9 | 66.51 | 3.41  | 17 | 1 | 1 | 1 | 410 | 9.48  |
| WP_002883720.1 | branched-chain amino acid ABC transporter permease [ <i>Streptococcus</i> ]                 | 33.9 | 65.62 | 6.65  | 12 | 2 | 2 | 2 | 316 | 9.54  |
| MBS7214967.1   | carbamoyl-phosphate synthase large subunit [ <i>Streptococcus salivarius</i> ]              | 99.6 | 65.39 | 4.76  | 90 | 4 | 4 | 4 | 904 | 4.78  |
| MBS7214802.1   | YSIRK signal domain/LPXTG anchor domain surface protein [ <i>Streptococcus salivarius</i> ] | 54.9 | 65.08 | 2.53  | 84 | 1 | 1 | 1 | 514 | 6.06  |
| KJU94562.1     | heat shock protein GrpE [ <i>Streptococcus salivarius</i> ]                                 | 19.9 | 64.97 | 13.29 | 44 | 2 | 2 | 2 | 173 | 4.70  |
| MBS7214875.1   | esterase family protein [ <i>Streptococcus salivarius</i> ]                                 | 25.4 | 64.34 | 5.02  | 18 | 1 | 1 | 2 | 219 | 5.40  |
| AEJ54106.1     | conserved hypothetical protein [ <i>Streptococcus salivarius</i> 57.1]                      | 11.7 | 63.86 | 23.58 | 19 | 3 | 3 | 3 | 106 | 9.94  |
| WP_002884978.1 | response regulator YycF [ <i>Streptococcus</i> ]                                            | 27.0 | 63.82 | 8.94  | 11 | 2 | 2 | 2 | 235 | 5.19  |
| MBS6733527.1   | DUF948 domain-containing protein [ <i>Streptococcus salivarius</i> ]                        | 7.7  | 63.71 | 14.67 | 12 | 1 | 1 | 1 | 75  | 9.32  |
| WP_073690614.1 | glycerol-3-phosphate 1-O-acyltransferase PlsY, partial [ <i>Streptococcus salivarius</i> ]  | 21.8 | 63.66 | 7.00  | 39 | 1 | 1 | 1 | 200 | 9.64  |
| AAC43563.1     | urease gamma subunit [ <i>Streptococcus salivarius</i> ]                                    | 11.5 | 63.55 | 17.48 | 7  | 3 | 3 | 3 | 103 | 6.30  |
| WP_142236616.1 | transcriptional repressor, partial [ <i>Streptococcus salivarius</i> ]                      | 9.8  | 62.99 | 25.58 | 23 | 2 | 2 | 2 | 86  | 4.92  |
| MBS6120384.1   | aspartate kinase [ <i>Streptococcus salivarius</i> ]                                        | 41.9 | 62.70 | 9.52  | 33 | 3 | 3 | 3 | 378 | 4.94  |
| MBF1717945.1   | glutamine-hydrolyzing GMP synthase [ <i>Streptococcus salivarius</i> ]                      | 56.7 | 61.50 | 3.68  | 40 | 2 | 2 | 2 | 516 | 4.94  |
| WP_073690484.1 | hypothetical protein, partial [ <i>Streptococcus salivarius</i> ]                           | 42.0 | 61.09 | 3.12  | 79 | 1 | 1 | 1 | 385 | 5.22  |
| MBF1719041.1   | ABC transporter ATP-binding protein [ <i>Streptococcus salivarius</i> ]                     | 45.3 | 59.88 | 3.95  | 76 | 2 | 2 | 2 | 405 | 5.39  |
| MBS6886067.1   | ABC transporter ATP-binding protein [ <i>Streptococcus salivarius</i> ]                     | 22.8 | 59.83 | 14.71 | 16 | 3 | 3 | 3 | 204 | 7.05  |
| MBS6121086.1   | ABC transporter permease [ <i>Streptococcus salivarius</i> ]                                | 19.8 | 59.75 | 4.81  | 19 | 1 | 1 | 1 | 187 | 4.84  |
| WP_195413864.1 | CPBP family intramembrane metalloprotease [ <i>Streptococcus salivarius</i> ]               | 23.4 | 59.03 | 3.79  | 4  | 1 | 1 | 1 | 211 | 9.67  |
| WP_247922959.1 | lipoate--protein ligase family protein, partial [ <i>Streptococcus salivarius</i> ]         | 17.6 | 58.52 | 6.41  | 41 | 1 | 1 | 1 | 156 | 6.09  |
| MBS6761570.1   | acyl carrier protein [ <i>Streptococcus salivarius</i> ]                                    | 8.4  | 58.36 | 14.86 | 6  | 1 | 1 | 1 | 74  | 3.87  |
| WP_002885996.1 | ribosome biogenesis GTP-binding protein YihA/YsxC [ <i>Streptococcus</i> ]                  | 22.8 | 58.32 | 12.06 | 17 | 2 | 2 | 2 | 199 | 8.66  |
| WP_073922203.1 | urease accessory protein UreG, partial [ <i>Streptococcus salivarius</i> ]                  | 16.8 | 58.09 | 5.23  | 11 | 1 | 1 | 1 | 153 | 4.88  |
| MBS7214217.1   | pyruvate formate lyase-activating protein [ <i>Streptococcus salivarius</i> ]               | 30.5 | 57.66 | 10.90 | 9  | 2 | 2 | 2 | 266 | 6.04  |
| AEJ52680.1     | Mg <sup>2+</sup> and Co <sup>2+</sup> transporter [ <i>Streptococcus salivarius</i> 57.1]   | 35.9 | 56.31 | 3.22  | 27 | 1 | 1 | 1 | 311 | 4.86  |
| WP_155213573.1 | DUF1372 family protein [ <i>Streptococcus salivarius</i> ]                                  | 10.4 | 56.28 | 17.89 | 5  | 1 | 1 | 1 | 95  | 8.68  |
| RGW02733.1     | hypothetical protein [ <i>Streptococcus salivarius</i> ]                                    | 10.4 | 55.82 | 17.39 | 8  | 2 | 2 | 2 | 92  | 5.68  |
| WP_037597359.1 | tRNA dihydrouridine synthase DusB [ <i>Streptococcus salivarius</i> ]                       | 35.8 | 52.62 | 8.62  | 25 | 2 | 2 | 2 | 325 | 6.20  |
| WP_064526452.1 | acetolactate synthase small subunit, partial [ <i>Streptococcus salivarius</i> ]            | 13.8 | 51.64 | 12.80 | 13 | 2 | 2 | 2 | 125 | 7.27  |
| MBS6121021.1   | amino acid permease [ <i>Streptococcus salivarius</i> ]                                     | 47.3 | 51.04 | 2.12  | 47 | 1 | 1 | 2 | 424 | 9.36  |
| MBS7054875.1   | ATP-dependent Clp protease proteolytic subunit [ <i>Streptococcus salivarius</i> ]          | 20.4 | 50.76 | 12.90 | 11 | 2 | 2 | 2 | 186 | 4.96  |
| WP_014635141.1 | type Z 30S ribosomal protein S14 [ <i>Streptococcus salivarius</i> ]                        | 6.6  | 50.23 | 28.57 | 3  | 2 | 2 | 2 | 56  | 10.35 |

|                |                                                                                                                |      |       |       |    |   |   |   |     |       |
|----------------|----------------------------------------------------------------------------------------------------------------|------|-------|-------|----|---|---|---|-----|-------|
| WP_073689559.1 | rhodanese-related sulfurtransferase, partial [ <i>Streptococcus salivarius</i> ]                               | 27.2 | 47.56 | 5.93  | 50 | 1 | 1 | 1 | 236 | 5.01  |
| WP_002886207.1 | CsbD family protein [ <i>Streptococcus</i> ]                                                                   | 7.1  | 47.13 | 16.42 | 9  | 1 | 1 | 1 | 67  | 6.77  |
| WP_201710930.1 | CTP synthase, partial [ <i>Streptococcus salivarius</i> ]                                                      | 31.1 | 46.05 | 5.71  | 34 | 1 | 1 | 1 | 280 | 5.64  |
| WP_223896526.1 | cadmium resistance transporter, partial [ <i>Streptococcus salivarius</i> ]                                    | 5.6  | 45.60 | 26.53 | 32 | 1 | 1 | 1 | 49  | 6.51  |
| MBS6120897.1   | phosphotransferase family protein [ <i>Streptococcus salivarius</i> ]                                          | 24.3 | 45.20 | 3.79  | 7  | 1 | 1 | 1 | 211 | 6.87  |
| WP_096832747.1 | P-loop NTPase fold protein [ <i>Streptococcus salivarius</i> ]                                                 | 74.1 | 44.99 | 0.96  | 1  | 1 | 1 | 3 | 623 | 8.07  |
| MBS6119901.1   | glycosyltransferase family 2 protein [ <i>Streptococcus salivarius</i> ]                                       | 16.9 | 44.99 | 15.49 | 23 | 2 | 2 | 2 | 142 | 10.04 |
| MBS6732157.1   | CDP-diacylglycerol--glycerol-3-phosphate 3-phosphatidyltransferase [ <i>Streptococcus salivarius</i> ]         | 19.9 | 44.88 | 8.89  | 16 | 2 | 2 | 2 | 180 | 9.03  |
| MBS7054767.1   | DUF1846 family protein [ <i>Streptococcus salivarius</i> ]                                                     | 28.8 | 43.59 | 5.77  | 44 | 1 | 1 | 1 | 260 | 5.57  |
| MBS4922658.1   | DUF805 domain-containing protein [ <i>Streptococcus salivarius</i> ]                                           | 14.0 | 43.45 | 11.67 | 40 | 2 | 2 | 2 | 120 | 9.16  |
| AEJ52879.1     | ribonuclease BN [ <i>Streptococcus salivarius</i> 57.I]                                                        | 35.4 | 43.27 | 5.75  | 31 | 1 | 1 | 1 | 313 | 9.74  |
| WP_002892266.1 | ABC transporter ATP-binding protein [ <i>Streptococcus salivarius</i> ]                                        | 34.4 | 43.22 | 4.29  | 4  | 2 | 2 | 2 | 303 | 8.02  |
| MBS4823402.1   | phosphocarrier protein HPr [ <i>Streptococcus salivarius</i> ]                                                 | 8.9  | 43.14 | 11.49 | 3  | 1 | 1 | 1 | 87  | 5.05  |
| MBS6760419.1   | DUF956 family protein [ <i>Streptococcus salivarius</i> ]                                                      | 15.2 | 42.97 | 17.19 | 20 | 2 | 2 | 2 | 128 | 10.26 |
| WP_073690295.1 | tryptophan synthase subunit alpha, partial [ <i>Streptococcus salivarius</i> ]                                 | 18.5 | 42.73 | 10.65 | 49 | 1 | 1 | 1 | 169 | 5.01  |
| WP_002885967.1 | DUF1827 family protein [ <i>Streptococcus</i> ]                                                                | 11.7 | 42.64 | 8.00  | 2  | 1 | 1 | 1 | 100 | 6.95  |
| WP_084913461.1 | DUF87 domain-containing protein, partial [ <i>Streptococcus salivarius</i> ]                                   | 45.8 | 41.23 | 2.94  | 3  | 1 | 1 | 1 | 408 | 6.46  |
| MBS4822178.1   | CppA family protein [ <i>Streptococcus salivarius</i> ]                                                        | 28.8 | 40.45 | 5.18  | 19 | 1 | 1 | 1 | 251 | 4.53  |
| MBS6120594.1   | DegV family protein [ <i>Streptococcus salivarius</i> ]                                                        | 14.5 | 40.12 | 6.02  | 82 | 1 | 1 | 1 | 133 | 9.36  |
| MBS4822338.1   | TetR/AcrR family transcriptional regulator [ <i>Streptococcus salivarius</i> ]                                 | 22.5 | 40.03 | 5.05  | 25 | 1 | 1 | 1 | 198 | 6.68  |
| MBS6890550.1   | bacteriocin immunity protein [ <i>Streptococcus salivarius</i> ]                                               | 11.3 | 39.82 | 12.24 | 16 | 1 | 1 | 1 | 98  | 6.11  |
| MBS6732137.1   | acid-activated urea channel [ <i>Streptococcus salivarius</i> ]                                                | 7.0  | 39.73 | 10.61 | 12 | 1 | 1 | 1 | 66  | 5.72  |
| MBS6885736.1   | UDP-N-acetylglucosamine 1-carboxyvinyltransferase [ <i>Streptococcus salivarius</i> ]                          | 31.6 | 39.27 | 3.00  | 35 | 1 | 1 | 1 | 300 | 5.03  |
| MBS6531340.1   | NADPH-dependent 7-cyano-7-deazaguanine reductase QueF [ <i>Streptococcus salivarius</i> ]                      | 17.0 | 37.95 | 6.29  | 12 | 1 | 1 | 1 | 143 | 5.15  |
| MBF1718323.1   | site-specific integrase [ <i>Streptococcus salivarius</i> ]                                                    | 48.2 | 37.93 | 1.43  | 1  | 1 | 1 | 1 | 421 | 9.60  |
| CCB96178.1     | response regulator of the LytR/AlgR family [ <i>Streptococcus salivarius</i> JIM8777]                          | 27.3 | 37.92 | 3.80  | 19 | 1 | 1 | 1 | 237 | 7.97  |
| HBJ24245.1     | type I 3-dehydroquinate dehydratase [ <i>Streptococcus salivarius</i> ]                                        | 25.5 | 37.38 | 5.78  | 42 | 1 | 1 | 1 | 225 | 4.67  |
| WP_073922287.1 | pyrimidine-nucleoside phosphorylase, partial [ <i>Streptococcus salivarius</i> ]                               | 45.1 | 36.77 | 2.65  | 66 | 1 | 1 | 1 | 415 | 5.06  |
| WP_064523977.1 | hypothetical protein [ <i>Streptococcus salivarius</i> ]                                                       | 11.3 | 36.41 | 6.38  | 1  | 1 | 1 | 1 | 94  | 5.31  |
| WP_073687230.1 | ATP-binding cassette domain-containing protein [ <i>Streptococcus</i> ]                                        | 27.0 | 36.36 | 2.46  | 1  | 1 | 1 | 1 | 244 | 9.09  |
| WP_231593871.1 | hypothetical protein [ <i>Streptococcus salivarius</i> ]                                                       | 6.0  | 36.18 | 11.32 | 2  | 1 | 1 | 1 | 53  | 10.13 |
| WP_000598356.1 | DUF3173 domain-containing protein [ <i>Streptococcus</i> ]                                                     | 7.0  | 36.06 | 9.38  | 2  | 1 | 1 | 1 | 64  | 8.54  |
| WP_142236428.1 | tRNA uridine-5-carboxymethylaminomethyl(34) synthesis enzyme MnmG, partial [ <i>Streptococcus salivarius</i> ] | 27.8 | 36.02 | 3.13  | 48 | 1 | 1 | 1 | 256 | 5.52  |
| WP_247914645.1 | Asp23/Gls24 family envelope stress response protein, partial [ <i>Streptococcus salivarius</i> ]               | 8.0  | 35.97 | 11.69 | 5  | 1 | 1 | 1 | 77  | 4.96  |
| WP_195310560.1 | hypothetical protein [ <i>Streptococcus salivarius</i> ]                                                       | 55.6 | 35.75 | 1.30  | 3  | 1 | 1 | 1 | 462 | 7.84  |

|                |                                                                                                                                           |      |       |       |    |   |   |   |     |       |
|----------------|-------------------------------------------------------------------------------------------------------------------------------------------|------|-------|-------|----|---|---|---|-----|-------|
| WP_013990691.1 | UDP-N-acetylglucosamine 2-epimerase (non-hydrolyzing) [ <i>Streptococcus</i> ]                                                            | 43.1 | 35.19 | 1.57  | 2  | 1 | 1 | 1 | 383 | 5.90  |
| WP_225791458.1 | tape measure protein [ <i>Streptococcus salivarius</i> ]                                                                                  | 33.3 | 35.19 | 3.14  | 8  | 1 | 1 | 1 | 318 | 9.13  |
| AEJ52985.1     | organic phosphate binding cyth family protein [ <i>Streptococcus salivarius</i> 57.I]                                                     | 13.6 | 34.92 | 6.72  | 26 | 1 | 1 | 1 | 119 | 5.10  |
| MBS6531707.1   | acetyl-CoA carboxylase carboxyl transferase subunit alpha [ <i>Streptococcus salivarius</i> ]                                             | 16.0 | 34.34 | 5.44  | 23 | 1 | 1 | 1 | 147 | 7.43  |
| WP_179968688.1 | efflux RND transporter periplasmic adaptor subunit, partial [ <i>Streptococcus salivarius</i> ]                                           | 29.6 | 33.85 | 5.13  | 71 | 1 | 1 | 1 | 273 | 4.77  |
| MBS6731867.1   | ABC transporter permease [ <i>Streptococcus salivarius</i> ]                                                                              | 40.1 | 33.84 | 2.32  | 13 | 1 | 1 | 1 | 345 | 10.02 |
| MBS6885364.1   | 30S ribosomal protein S20 [ <i>Streptococcus salivarius</i> ]                                                                             | 7.6  | 33.65 | 17.14 | 7  | 1 | 1 | 1 | 70  | 10.29 |
| MBF1719263.1   | bifunctional UDP-N-acetylglucosamine diphosphorylase/glucosamine-1-phosphate N-acetyltransferase GlmU [ <i>Streptococcus salivarius</i> ] | 45.1 | 33.42 | 1.92  | 53 | 1 | 1 | 1 | 416 | 5.40  |
| WP_241672536.1 | cell wall-active antibiotics response protein [ <i>Streptococcus salivarius</i> ]                                                         | 15.3 | 33.35 | 5.11  | 70 | 1 | 1 | 1 | 137 | 8.97  |
| WP_002885550.1 | DUF1149 family protein [ <i>Streptococcus</i> ]                                                                                           | 14.4 | 31.86 | 20.97 | 5  | 2 | 2 | 2 | 124 | 4.75  |
| AMB83404.1     | hypothetical protein [ <i>Streptococcus salivarius</i> ]                                                                                  | 9.1  | 31.41 | 10.67 | 28 | 1 | 1 | 1 | 75  | 9.48  |
| WP_247915103.1 | aldo/keto reductase, partial [ <i>Streptococcus salivarius</i> ]                                                                          | 30.3 | 31.12 | 5.86  | 85 | 2 | 2 | 2 | 273 | 4.81  |
| MBS6761620.1   | ABC-F family ATP-binding cassette domain-containing protein [ <i>Streptococcus salivarius</i> ]                                           | 37.7 | 30.89 | 3.34  | 40 | 1 | 1 | 1 | 329 | 5.19  |
| WP_002883656.1 | preprotein translocase subunit SecE [ <i>Streptococcus</i> ]                                                                              | 7.0  | 30.02 | 12.07 | 2  | 1 | 1 | 1 | 58  | 8.62  |
| WP_195401316.1 | ImmA/IrrE family metallo-endopeptidase [ <i>Streptococcus salivarius</i> ]                                                                | 34.2 | 29.03 | 2.79  | 3  | 2 | 2 | 4 | 287 | 6.89  |
| BAE97498.1     | DNA gyrase subunit B, partial [ <i>Streptococcus salivarius</i> ]                                                                         | 33.4 | 28.97 | 6.67  | 39 | 2 | 2 | 2 | 300 | 7.43  |
| AEJ54319.1     | regulatory protein spx [ <i>Streptococcus salivarius</i> 57.I]                                                                            | 12.9 | 28.40 | 7.96  | 2  | 1 | 1 | 1 | 113 | 6.14  |
| MBS6273035.1   | ammonia-dependent NAD(+) synthetase [ <i>Streptococcus salivarius</i> ]                                                                   | 30.0 | 28.02 | 6.23  | 48 | 2 | 2 | 2 | 273 | 5.25  |
| AEJ53397.1     | regulatory protein spx [ <i>Streptococcus salivarius</i> 57.I]                                                                            | 13.9 | 27.95 | 9.32  | 12 | 1 | 1 | 1 | 118 | 5.05  |
| WP_073922337.1 | ketoacyl-ACP synthase III, partial [ <i>Streptococcus salivarius</i> ]                                                                    | 33.0 | 27.61 | 2.59  | 50 | 1 | 1 | 1 | 309 | 4.78  |
| WP_241525105.1 | alpha-amylase family glycosyl hydrolase, partial [ <i>Streptococcus salivarius</i> ]                                                      | 39.0 | 27.59 | 2.70  | 65 | 1 | 1 | 1 | 333 | 5.25  |
| MBS6119481.1   | DNA-dependent RNA polymerase auxiliary subunit epsilon family protein [ <i>Streptococcus salivarius</i> ]                                 | 9.1  | 27.35 | 9.21  | 10 | 1 | 1 | 1 | 76  | 4.68  |
| MBS5182041.1   | pyridoxal 5'-phosphate synthase lyase subunit PdxS [ <i>Streptococcus salivarius</i> ]                                                    | 19.7 | 25.61 | 5.52  | 27 | 1 | 1 | 1 | 181 | 6.13  |
